# Supplementary material for: Fracture risk reduction and safety by osteoporosis treatment compared with placebo or active comparator in postmenopausal women: systematic review, network meta-analysis, and meta-regression analysis of randomised clinical trials
Source: PubMed Central journal article supplement — BMJ. 2023 May 2;381:e068033. doi: 10.1136/bmj-2021-068033 (PMC10152340; doi:10.1136/bmj-2021-068033), 2023-05-02
Supplement: hanm068033.ww.pdf [file hanm068033.ww.pdf]

# Supplementary material

|                                                                                                                                       |     |
|---------------------------------------------------------------------------------------------------------------------------------------|-----|
| S1 Table. Search strategy .....                                                                                                       | 4   |
| Search strategy up to November 11 2019 in Medline, Embase and Cochrane Library .....                                                  | 4   |
| Search strategy from November 2019 to November 24 2021 in Medline, Embase and Cochrane Library...                                     | 7   |
| S2 Table. Example of contact to authors .....                                                                                         | 10  |
| S3 Table. List of excluded studies .....                                                                                              | 11  |
| S4 Table. Characteristics of included studies .....                                                                                   | 88  |
| General list.....                                                                                                                     | 88  |
| The ACTIVE (The Abaloparatide Comparator Trial In Vertebral Endpoints) study .....                                                    | 126 |
| The BONE study (oral iBandronate Osteoporosis Vertebral Fracture Trial in North America and Europe, BONE).....                        | 129 |
| FIT (The Fracture Intervention Trial).....                                                                                            | 131 |
| The FPT (The Fracture Prevention Trial).....                                                                                          | 135 |
| The FRAME (The FRActure study in postmenopausal woMen with ostEoporosis) Trial .....                                                  | 141 |
| The FREEDOM (Fracture Reduction Evaluation of Denosumab in Osteoporosis Every 6 Months) study..                                       | 144 |
| The HORIZON-PFT (Health Outcomes and Reduced Incidence with Zoledronic Acid Once Yearly (HORIZON) Pivotal Fracture Trial (PFT)) ..... | 150 |
| Lieberman.....                                                                                                                        | 152 |
| The MORE (Multiple Outcomes of Raloxifene Evaluation) study .....                                                                     | 154 |
| Silverman 2008.....                                                                                                                   | 160 |
| The VERO (The VERtebral fracture treatment comparisons in Osteoporotic women) Study .....                                             | 163 |
| The VERT (Vertebral Efficacy with Risedronate Therapy) Trials .....                                                                   | 166 |
| The ZEST (Zoledronic acid in frail Elders to STrengthen bone) study .....                                                             | 170 |
| S5 Table. Funding and conflict of interest statements of included studies .....                                                       | 171 |
| S1 Fig. Funnel Plots.....                                                                                                             | 189 |
| Funnel plot of comparison: Treatment vs. Placebo, outcome: Clinical fractures .....                                                   | 189 |
| Funnel plot of comparison: Treatment vs. Comparator, outcome: Clinical fractures .....                                                | 190 |
| Funnel plot of comparison: Treatment vs. Placebo, outcome: Vertebral fractures .....                                                  | 191 |
| Funnel plot of comparison: Treatment vs. Comparator, outcome: Vertebral fractures .....                                               | 192 |
| Funnel plot of comparison: Treatment vs. Placebo, outcome: Non-vertebral fractures .....                                              | 193 |
| Funnel plot of comparison: Treatment vs. Comparator, outcome: Non-vertebral fractures .....                                           | 194 |
| Funnel plot of comparison: Treatment vs. Placebo, outcome: Hip fractures .....                                                        | 195 |
| S6 Table. Estimates of effects and quality ratings for comparison of drugs .....                                                      | 196 |

|                                                                                                                                                                                                                                                                                                            |     |
|------------------------------------------------------------------------------------------------------------------------------------------------------------------------------------------------------------------------------------------------------------------------------------------------------------|-----|
| Estimates of effects and quality ratings for comparison of drugs to prevent vertebral fractures.....                                                                                                                                                                                                       | 196 |
| Estimates of effects and quality ratings for comparison of drugs to prevent non-vertebral fractures.....                                                                                                                                                                                                   | 197 |
| Estimates of effects and quality ratings for comparison of drugs to prevent hip fractures .....                                                                                                                                                                                                            | 198 |
| Estimates of effects and quality ratings for comparison of drugs to prevent major osteoporotic fractures .....                                                                                                                                                                                             | 199 |
| Estimates of effects and quality ratings for comparison of drugs in relation to all-cause mortality.....                                                                                                                                                                                                   | 200 |
| Estimates of effects and quality ratings for comparison of drugs in relation to adverse events.....                                                                                                                                                                                                        | 201 |
| Estimates of effects and quality ratings for comparison of drugs in relation to number of patients cardiovascular related serious adverse events .....                                                                                                                                                     | 202 |
| S7 Table. Cochrane Risk of Bias tool 2 .....                                                                                                                                                                                                                                                               | 203 |
| S2 Fig. Forest Plots.....                                                                                                                                                                                                                                                                                  | 207 |
| Forest plot of risk ratio on clinical fractures comparing treatment to placebo.....                                                                                                                                                                                                                        | 207 |
| Forest plot of risk ratio on clinical fractures comparing treatment to other treatments .....                                                                                                                                                                                                              | 208 |
| Forest plot of risk ratio on vertebral fractures comparing treatment to placebo .....                                                                                                                                                                                                                      | 209 |
| Forest plot of risk ratio on vertebral fractures comparing treatment to other treatments .....                                                                                                                                                                                                             | 210 |
| Forest plot of risk ratio on non-vertebral fractures comparing treatment to placebo .....                                                                                                                                                                                                                  | 211 |
| Forest plot of risk ratio on non-vertebral fractures comparing treatment to other treatments.....                                                                                                                                                                                                          | 212 |
| Forest plot of risk ratio on hip fractures comparing treatment to placebo .....                                                                                                                                                                                                                            | 213 |
| Abbreviations: Bisphosphonates [BP], denosumab [DMAB], parathyroid hormone receptor [PTHrP] agonists, placebo [PBO], romosozumab [Romo], selective oestrogen receptor modulators [SERM], confidence interval [CI].Forest plot of risk ratio on hip fractures comparing treatment to other treatments ..... | 214 |
| Forest plot of risk ratio on major osteoporotic fractures comparing treatment to placebo .....                                                                                                                                                                                                             | 215 |
| Forest plot of risk ratio on major osteoporotic fractures comparing treatment to other treatments.....                                                                                                                                                                                                     | 216 |
| Forest plot of risk ratio on all-cause mortality comparing treatment to placebo .....                                                                                                                                                                                                                      | 217 |
| Forest plot of risk ratio on all-cause mortality comparing treatment to other treatments.....                                                                                                                                                                                                              | 218 |
| Forest plot of risk ratio on number of patients with any adverse events comparing treatment to placebo .....                                                                                                                                                                                               | 219 |
| Forest plot of risk ratio on number of patients with any adverse events comparing treatment to other treatments.....                                                                                                                                                                                       | 220 |
| Forest plot of risk ratio on number of patients with cardiovascular related serious adverse events comparing treatment to placebo.....                                                                                                                                                                     | 221 |
| Forest plot of risk ratio on number of patients with cardiovascular related serious adverse events comparing treatment to other treatments .....                                                                                                                                                           | 222 |
| S3 Fig. Distribution of baseline risk indicators across the direct comparisons included in network meta-analysis.....                                                                                                                                                                                      | 223 |
| S8 Table. Network meta-analysis, sensitivity analyses .....                                                                                                                                                                                                                                                | 226 |

|                                                         |     |
|---------------------------------------------------------|-----|
| Sensitivity analyses, fractures outcomes .....          | 226 |
| Sensitivity analysis, safety outcomes .....             | 227 |
| S9 Table. Mean ranks on clinical fractures .....        | 228 |
| S10 Table. SUCRA on clinical fractures .....            | 228 |
| S4 Fig. Rankogram on clinical fractures.....            | 229 |
| S11 Table. Meta-regression analyses .....               | 230 |
| Meta-regression analyses on clinical fracture risk..... | 230 |
| Meta-regression on vertebral fracture risk.....         | 231 |
| Meta-regression on non-vertebral fracture risk .....    | 232 |
| Meta-regression on hip fracture risk.....               | 233 |

## S1 Table. Search strategy

### Search strategy up to November 11 2019 in Medline, Embase and Cochrane Library

Database: Ovid MEDLINE(R) Daily Update <November 11, 2019>, Ovid MEDLINE(R) and In-Process & Other Non-Indexed Citations <1946 to November 11, 2019>

Search Strategy:

|    |                                                                                                                                                                                                      |        |
|----|------------------------------------------------------------------------------------------------------------------------------------------------------------------------------------------------------|--------|
| 1  | (disphosphonate* or diphosphonate* or bisphosphonate* or biphosphonate*).mp                                                                                                                          | 26758  |
| 2  | (alendronate* or aledronic* or fosamax or binosto).mp                                                                                                                                                | 5237   |
| 3  | (risedronic* or risedronate* or risedron* or actonel* or atelvia* or benet*).mp                                                                                                                      | 2115   |
| 4  | (ibandronic* or ibandronate* or BM210955 or boniva or bonviva).mp                                                                                                                                    | 1135   |
| 5  | (zoledronic* or zoledronate* or aclasta*).mp                                                                                                                                                         | 5005   |
| 6  | (RANK ligand inhibitor* or rank ligand or denosumab or AMG 162 or prolia).mp                                                                                                                         | 9553   |
| 7  | (Selective Estrogen Receptor Modulators or raloxifene or evista or bazedoxifene or Conjugated Estrogens or duavee or lasofoxifene or SERM).mp                                                        | 8115   |
| 8  | (teriparatide or TPTD or forsteo or forteo or recombinant human parathyroid hormone or rhPTH or Abaloparatide or Parathyroid hormone or parathyroid hormone-related protein or PTHrP or PTH 1-84).mp | 43164  |
| 9  | (romosozumab or cdp 7851 or cdp7851 or AMG 785 or evenity*).mp                                                                                                                                       | 180    |
| 10 | 1 or 2 or 3 or 4 or 5 or 6 or 7 or 8 or 9                                                                                                                                                            | 85467  |
| 11 | (fracture* or osteoporosis).mp                                                                                                                                                                       | 344223 |
| 12 | 10 and 11                                                                                                                                                                                            | 21425  |
| 13 | ((random* or control?ed or crossover or cross-over or blind* or mask*) adj3 (trial*1 or study or studies or analy*)) or rct).ti,ab,kw                                                                | 622986 |
| 14 | 12 and 13                                                                                                                                                                                            | 2374   |
| 15 | limit 12 to (controlled clinical trial or randomized controlled trial)                                                                                                                               | 2004   |
| 16 | 14 or 15                                                                                                                                                                                             | 3276   |
| 17 | limit 16 to yr="1996 - 2020"                                                                                                                                                                         | 3124   |
| 18 | limit 17 to human                                                                                                                                                                                    | 2904   |
| 19 | limit 18 to english language                                                                                                                                                                         | 2770   |

Notes:

[mp=title, abstract, original title, name of substance word, subject heading word, floating sub-heading word, keyword heading word, organism supplementary concept word, protocol supplementary concept word, rare disease supplementary concept word, unique identifier, synonyms]

[ti=title]; [ab=abstract]; [kw=key word]; [adj3=finds terms in any order with two words (or fewer) between them.]

Database: Embase <1974 to 2019 November 11>

Search Strategy:

|    |                                                                                                                                                                                                      |        |
|----|------------------------------------------------------------------------------------------------------------------------------------------------------------------------------------------------------|--------|
| 1  | (disphosphonate* or diphosphonate* or bisphosphonate* or biphosphonate*).mp                                                                                                                          | 31776  |
| 2  | (alendronate* or aledronic* or fosamax or binosto).mp                                                                                                                                                | 8255   |
| 3  | (risedronic* or risedronate* or risedron* or actonel* or atelvia* or benet*).mp                                                                                                                      | 8281   |
| 4  | (ibandronic* or ibandronate* or BM210955 or boniva or bonviva).mp                                                                                                                                    | 5308   |
| 5  | (zoledronic* or zoledronate* or aclasta*).mp                                                                                                                                                         | 16170  |
| 6  | (RANK ligand inhibitor* or rank ligand or denosumab or AMG 162 or prolia).mp                                                                                                                         | 9613   |
| 7  | (Selective Estrogen Receptor Modulators or raloxifene or evista or bazedoxifene or Conjugated Estrogens or duavee or lasofoxifene or SERM).mp                                                        | 14967  |
| 8  | (teriparatide or TPTD or forsteo or forteo or recombinant human parathyroid hormone or rhPTH or Abaloparatide or Parathyroid hormone or parathyroid hormone-related protein or PTHrP or PTH 1-84).mp | 71807  |
| 9  | (romosozumab or cdp 7851 or cdp7851 or AMG 785 or evenity*).mp                                                                                                                                       | 492    |
| 10 | 1 or 2 or 3 or 4 or 5 or 6 or 7 or 8 or 9                                                                                                                                                            | 127856 |
| 11 | (fracture* or osteoporosis).mp                                                                                                                                                                       | 459021 |
| 12 | 10 and 11                                                                                                                                                                                            | 41327  |
| 13 | ((((random* or control?ed or crossover or cross-over or blind* or mask*) adj3 (trial*1 or study or studies or analy*)) or rct).ti,ab,kw                                                              | 887221 |
| 14 | 12 and 13                                                                                                                                                                                            | 4260   |
| 15 | limit 12 to (controlled clinical trial or randomized controlled trial)                                                                                                                               | 3489   |
| 16 | 14 or 15                                                                                                                                                                                             | 5970   |
| 17 | limit 16 to yr="1996 - 2020"                                                                                                                                                                         | 5834   |
| 18 | limit 17 to human                                                                                                                                                                                    | 5476   |
| 19 | limit 18 to english language                                                                                                                                                                         | 5118   |

Notes:

[mp=title, abstract, original title, name of substance word, subject heading word, floating sub-heading word, keyword heading word, organism supplementary concept word, protocol supplementary concept word, rare disease supplementary concept word, unique identifier, synonyms]

[ti=title]; [ab=abstract]; [kw=key word]; [adj3=finds terms in any order with two words (or fewer) between them.]

Database: <https://www.cochranelibrary.com/advanced-search> (November 12, 2019)

Search Strategy:

|                                                                                                                                                                             |                                                                                                                                                                                                                                                                                                                                                                                                                                                                                                                                                                                                                                                                                                                                                                                                                                                                  |       |
|-----------------------------------------------------------------------------------------------------------------------------------------------------------------------------|------------------------------------------------------------------------------------------------------------------------------------------------------------------------------------------------------------------------------------------------------------------------------------------------------------------------------------------------------------------------------------------------------------------------------------------------------------------------------------------------------------------------------------------------------------------------------------------------------------------------------------------------------------------------------------------------------------------------------------------------------------------------------------------------------------------------------------------------------------------|-------|
| 1                                                                                                                                                                           | ((disphosphonate* or diphosphonate* or bisphosphonate* or biphosphonate*) OR (alendronate* or aledronic* or fosamax or binosto) OR (risedronic* or risedronate* or risedron* or actonel* or atelvia* or benet*) OR (ibandronic* or ibandronate* or BM210955 or boniva or bonviva) OR (zoledronic* or zoledronate* or aclasta*) OR (RANK ligand inhibitor* or rank ligand or denosumab or AMG 162 or prolia) OR (Selective Estrogen Receptor Modulators or raloxifene or evista or bazedoxifene or Conjugated Estrogens or duavee or lasofoxifene or SERM) OR (teriparatide or TPTD or forsteo or forteo or recombinant human parathyroid hormone or rhPTH or Abaloparatide or Parathyroid hormone or parathyroid hormone-related protein or PTHrP) OR (romosozumab or cdp 7851 or cdp7851 or AMG 785 or evenity*)):ti,ab,kw (Word variations have been searched) | 12244 |
| 2                                                                                                                                                                           | (fracture* or osteoporosis):ti,ab,kw (Word variations have been searched)                                                                                                                                                                                                                                                                                                                                                                                                                                                                                                                                                                                                                                                                                                                                                                                        | 26821 |
| 3                                                                                                                                                                           | #1 and #2<br><br>with Cochrane Library publication date from Jan 1996 to Nov 2019, in Cochrane Reviews (Word variations have been searched)                                                                                                                                                                                                                                                                                                                                                                                                                                                                                                                                                                                                                                                                                                                      | 32    |
| <p>Notes:</p> <p>[ti=title]; [ab=abstract]; [kw=key word]</p> <p>§ PTH 1-84 was excluded from this search due to error: this line contains missing or unrequired syntax</p> |                                                                                                                                                                                                                                                                                                                                                                                                                                                                                                                                                                                                                                                                                                                                                                                                                                                                  |       |

## Search strategy from November 2019 to November 24 2021 in Medline, Embase and Cochrane Library

Database: Ovid MEDLINE(R) Daily Update <November 24, 2021>, Ovid MEDLINE(R) and In-Process & Other Non-Indexed Citations <1946 to November 24, 2021>

Search Strategy:

|    |                                                                                                                                                                                                      |        |
|----|------------------------------------------------------------------------------------------------------------------------------------------------------------------------------------------------------|--------|
| 1  | (disphosphonate* or diphosphonate* or bisphosphonate* or biphosphonate*).mp                                                                                                                          | 29085  |
| 2  | (alendronate* or aledronic* or fosamax or binosto).mp                                                                                                                                                | 5753   |
| 3  | (risedronic* or risedronate* or risedron* or actonel* or atelvia* or benet*).mp                                                                                                                      | 2265   |
| 4  | (ibandronic* or ibandronate* or BM210955 or boniva or bonviva).mp                                                                                                                                    | 1214   |
| 5  | (zoledronic* or zoledronate* or aclasta*).mp                                                                                                                                                         | 5771   |
| 6  | (RANK ligand inhibitor* or rank ligand or denosumab or AMG 162 or prolia).mp                                                                                                                         | 11376  |
| 7  | (Selective Estrogen Receptor Modulators or raloxifene or evista or bazedoxifene or Conjugated Estrogens or duavee or lasofoxifene or SERM).mp                                                        | 8666   |
| 8  | (teriparatide or TPTD or forsteo or forteo or recombinant human parathyroid hormone or rhPTH or Abaloparatide or Parathyroid hormone or parathyroid hormone-related protein or PTHrP or PTH 1-84).mp | 46145  |
| 9  | (romosozumab or cdp 7851 or cdp7851 or AMG 785 or evenity*).mp                                                                                                                                       | 305    |
| 10 | 1 or 2 or 3 or 4 or 5 or 6 or 7 or 8 or 9                                                                                                                                                            | 92887  |
| 11 | (fracture* or osteoporosis).mp                                                                                                                                                                       | 383597 |
| 12 | 10 and 11                                                                                                                                                                                            | 23862  |
| 13 | ((random* or control?ed or crossover or cross-over or blind* or mask*) adj3 (trial*1 or study or studies or analy*)) or rct).ti,ab,kw                                                                | 732237 |
| 14 | 12 and 13                                                                                                                                                                                            | 2612   |
| 15 | limit 12 to (controlled clinical trial or randomized controlled trial)                                                                                                                               | 2136   |
| 16 | 14 or 15                                                                                                                                                                                             | 3565   |
| 17 | limit 16 to yr="2019 -2021"                                                                                                                                                                          | 382    |
| 18 | limit 17 to human                                                                                                                                                                                    | 306    |
| 19 | limit 18 to english language                                                                                                                                                                         | 301    |

Notes:

[mp=title, abstract, original title, name of substance word, subject heading word, floating sub-heading word, keyword heading word, organism supplementary concept word, protocol supplementary concept word, rare disease supplementary concept word, unique identifier, synonyms]

[ti=title]; [ab=abstract]; [kw=key word]; [adj3=finds terms in any order with two words (or fewer) between them.]

Database: Embase <2019 November 11 to 2021 November 24 >

Search Strategy:

|    |                                                                                                                                                                                                      |         |
|----|------------------------------------------------------------------------------------------------------------------------------------------------------------------------------------------------------|---------|
| 1  | (disphosphonate* or diphosphonate* or bisphosphonate* or biphosphonate*).mp                                                                                                                          | 35005   |
| 2  | (alendronate* or aledronic* or fosamax or binosto).mp                                                                                                                                                | 9005    |
| 3  | (risedronic* or risedronate* or risedron* or actonel* or atelvia* or benet*).mp                                                                                                                      | 8940    |
| 4  | (ibandronic* or ibandronate* or BM210955 or boniva or bonviva).mp                                                                                                                                    | 5725    |
| 5  | (zoledronic* or zoledronate* or aclasta*).mp                                                                                                                                                         | 18485   |
| 6  | (RANK ligand inhibitor* or rank ligand or denosumab or AMG 162 or prolia).mp                                                                                                                         | 12234   |
| 7  | (Selective Estrogen Receptor Modulators or raloxifene or evista or bazedoxifene or Conjugated Estrogens or duavee or lasofoxifene or SERM).mp                                                        | 15986   |
| 8  | (teriparatide or TPTD or forsteo or forteo or recombinant human parathyroid hormone or rhPTH or Abaloparatide or Parathyroid hormone or parathyroid hormone-related protein or PTHrP or PTH 1-84).mp | 79321   |
| 9  | (romosozumab or cdp 7851 or cdp7851 or AMG 785 or evenity*).mp                                                                                                                                       | 827     |
| 10 | 1 or 2 or 3 or 4 or 5 or 6 or 7 or 8 or 9                                                                                                                                                            | 141695  |
| 11 | (fracture* or osteoporosis).mp                                                                                                                                                                       | 520202  |
| 12 | 10 and 11                                                                                                                                                                                            | 46331   |
| 13 | ((((random* or control?ed or crossover or cross-over or blind* or mask*) adj3 (trial*1 or study or studies or analy*)) or rct).ti,ab,kw                                                              | 1032064 |
| 14 | 12 and 13                                                                                                                                                                                            | 4661    |
| 15 | limit 12 to (controlled clinical trial or randomized controlled trial)                                                                                                                               | 3769    |
| 16 | 14 or 15                                                                                                                                                                                             | 6486    |
| 17 | limit 16 to yr="2019 -2021"                                                                                                                                                                          | 746     |
| 18 | limit 17 to human                                                                                                                                                                                    | 735     |
| 19 | limit 18 to english language                                                                                                                                                                         | 720     |

Notes:

[mp=title, abstract, original title, name of substance word, subject heading word, floating sub-heading word, keyword heading word, organism supplementary concept word, protocol supplementary concept word, rare disease supplementary concept word, unique identifier, synonyms]

[ti=title]; [ab=abstract]; [kw=key word]; [adj3=finds terms in any order with two words (or fewer) between them.]



Database: <https://www.cochranelibrary.com/advanced-search> (November 25, 2021)

Search Strategy:

|                                                                                                                                                                             |                                                                                                                                                                                                                                                                                                                                                                                                                                                                                                                                                                                                                                                                                                                                                                                                                                                                  |       |
|-----------------------------------------------------------------------------------------------------------------------------------------------------------------------------|------------------------------------------------------------------------------------------------------------------------------------------------------------------------------------------------------------------------------------------------------------------------------------------------------------------------------------------------------------------------------------------------------------------------------------------------------------------------------------------------------------------------------------------------------------------------------------------------------------------------------------------------------------------------------------------------------------------------------------------------------------------------------------------------------------------------------------------------------------------|-------|
| 1                                                                                                                                                                           | ((disphosphonate* or diphosphonate* or bisphosphonate* or biphosphonate*) OR (alendronate* or aledronic* or fosamax or binosto) OR (risedronic* or risedronate* or risedron* or actonel* or atelvia* or benet*) OR (ibandronic* or ibandronate* or BM210955 or boniva or bonviva) OR (zoledronic* or zoledronate* or aclasta*) OR (RANK ligand inhibitor* or rank ligand or denosumab or AMG 162 or prolia) OR (Selective Estrogen Receptor Modulators or raloxifene or evista or bazedoxifene or Conjugated Estrogens or duavee or lasofoxifene or SERM) OR (teriparatide or TPTD or forsteo or forteo or recombinant human parathyroid hormone or rhPTH or Abaloparatide or Parathyroid hormone or parathyroid hormone-related protein or PTHrP) OR (romosozumab or cdp 7851 or cdp7851 or AMG 785 or evenity*)):ti,ab,kw (Word variations have been searched) | 13481 |
| 2                                                                                                                                                                           | (fracture* or osteoporosis):ti,ab,kw (Word variations have been searched)                                                                                                                                                                                                                                                                                                                                                                                                                                                                                                                                                                                                                                                                                                                                                                                        | 30973 |
| 3                                                                                                                                                                           | #1 and #2<br><br>with Cochrane Library publication date from Jan 1996 to Nov 2019, in Cochrane Reviews (Word variations have been searched)                                                                                                                                                                                                                                                                                                                                                                                                                                                                                                                                                                                                                                                                                                                      | 6     |
| <p>Notes:</p> <p>[ti=title]; [ab=abstract]; [kw=key word]</p> <p>§ PTH 1-84 was excluded from this search due to error: this line contains missing or unrequired syntax</p> |                                                                                                                                                                                                                                                                                                                                                                                                                                                                                                                                                                                                                                                                                                                                                                                                                                                                  |       |

## S2 Table. Example of contact to authors

Dear Dr. Nicola Colacurci,

We are currently working on a systematic review, and came across your study on:

“Raloxifene slows down the progression of intima-media thickness in postmenopausal women”.

Do you have any fracture data from this study, and if so would you be willing to share this data?

Many thanks.

Best regards

Mina Nicole Händel, MSc, PhD

Research Unit for Dietary Studies at The Parker Institute

Frederiksberg Hospital

Nordre Fasanvej 57, Vej 8, indgang 11

2000 Frederiksberg

Denmark

Email: [mina.nicole.holmgaard.handel@regionh.dk](mailto:mina.nicole.holmgaard.handel@regionh.dk)

### S3 Table. List of excluded studies

**Supplemental table 2.** List of excluded articles after full text-selection

| No. | Authors  | Year      | Reference (extracted from covidence)                                                                                                                                                                                                                                                                                                                     | Reasons for exclusion                  |
|-----|----------|-----------|----------------------------------------------------------------------------------------------------------------------------------------------------------------------------------------------------------------------------------------------------------------------------------------------------------------------------------------------------------|----------------------------------------|
| 1.  | Ackerman | 2008      | Ackerman, K. E. Is denosumab a safe and effective treatment for postmenopausal osteoporosis? <i>Nature Clinical Practice Endocrinology and Metabolism</i> 2008;4(7):376-377                                                                                                                                                                              | Wrong outcomes                         |
| 2.  | Adachi   | 2005      | Adachi, J. D.; Adami, S.; Kulkarni, P. M.; Wong, M.; Stock, J. L.. Similar proportions of women lose bone mineral density with raloxifene or alendronate treatment. <i>Journal of Clinical Densitometry</i> 2005;8(3):273-277.                                                                                                                           | Wrong outcomes                         |
| 3.  | Adachi   | 2005<br>a | Adachi, J. D.; Rizzoli, R.; Boonen, S.; Li, Z.; Meredith, M. P.; Chesnut, Iii C. H.. Vertebral fracture risk reduction with risedronate in post-menopausal women with osteoporosis: A meta-analysis of individual patient data. <i>Aging - Clinical and Experimental Research</i> . 2005;17(2):150-156                                                   | Systematic review and/or meta-analysis |
| 4.  | Adachi   | 2010      | Adachi, J. D.; Lyles, K. W.; Boonen, S.; Colon-Emeric, C.; Hyldstrup, L.; Nordsletten, L.; Pieper, C.; Recknor, C.; Su, G.; Bucci-Rechtweg, C.; Magaziner, J. Subtrochanteric fractures: Results from the HORIZON-Recurrent fracture trial. <i>Osteoporosis International</i> May 2010;1():S23                                                           | Wrong patient population               |
| 5.  | Adachi   | 2010      | Adachi, J. D.; McClung, M.; Cummings, S.; Man, Z.; Lippuner, K.; Farrerons, J.; Torring, O.; Gallagher, J.; Franchimont, N.; San Martin, J.; Wang, A.; Boonen, S. Effect of denosumab on hip fractures in postmenopausal women: A subanalysis of the FREEDOM study. <i>Journal of the American Geriatrics Society</i> April 2010;1():S24                 | Conference abstract                    |
| 6.  | Adachi   | 2009      | Adachi, J. D.; McClung, M.; Minisola, S.; Lippuner, K.; Torring, O.; Rizzoli, R.; Man, Z. Fracture incidence in postmenopausal women at higher risk of fracture after 3 years of denosumab treatment. <i>Arthritis and Rheumatism</i> 2009;10():884                                                                                                      | Conference abstract                    |
| 7.  | Adachi   | 2011      | Adachi, J.; Bucci-Rechtweg, C.; Su, G.; Eriksen, E.; Magaziner, J.; Lyles, K.; Colon-Emeric, C.; Boonen, S.; Pieper, C.; Mautalen, C.; Hyldstrup, L.; Recknor, C.; Nordsletten, L.. Zoledronic acid improves health-related quality of life in patients with hip fracture: Results of HORIZON-RFT. <i>Osteoporosis International</i> 2011;1():S140-S142. | Wrong patient population               |
| 8.  | Adami    | 2004      | Adami, S.; Felsenberg, D.; Christiansen, C.; Robinson, J.; Lorenc, R. S.; Mahoney, P.; Coutant, K.; Schimmer, R. C.; Delmas, P. D.. Efficacy and safety of ibandronate given by intravenous injection once every 3 months. <i>Bone</i> 2004;34(5):881-889.                                                                                               | Wrong outcomes                         |
| 9.  | Adami    | 2008      | Adami, S.; Gatti, D.; Bertoldo, F.; Sartori, L.; Di Munno, O.; Filipponi, P.; Marcocci, C.; Frediani, B.; Palummeri, E.; Fiore, C. E.; Costi, D.; Rossini, M..                                                                                                                                                                                           | Wrong intervention                     |

| No. | Authors | Year      | Reference (extracted from covidence)                                                                                                                                                                                                                                                                                                                                                                                                  | Reasons for exclusion                  |
|-----|---------|-----------|---------------------------------------------------------------------------------------------------------------------------------------------------------------------------------------------------------------------------------------------------------------------------------------------------------------------------------------------------------------------------------------------------------------------------------------|----------------------------------------|
|     |         |           | Intramuscular neridronate in postmenopausal women with low bone mineral density. <i>Calcified Tissue International</i> 2008;83(5):301-307.                                                                                                                                                                                                                                                                                            |                                        |
| 10. | Adami   | 2009      | Adami, S.; Giannini, S.; Bianchi, G.; Sinigaglia, L.; Di Munno, O.; Fiore, C. E.; Minisola, S.; Rossini, M. Vitamin D status and response to treatment in post-menopausal osteoporosis. <i>Osteoporosis International</i> February 2009;20(2):239-244                                                                                                                                                                                 | Wrong intervention                     |
| 11. | Adami   | 2010      | Adami, S.; Gilchrist, N.; Lyritis, G.; Palacios, S.; Pavelka, K.; Resch, H.; Roux, C.; Uebelhart, D.; De Gregorio, L.; Siris, E.; Wang, A.; Moller, G.; Libanati, C.; Cummings, S.. Effect of denosumab on fracture healing in postmenopausal women with osteoporosis: Results from the FREEDOM trial (study sponsored by Amgen Inc.). <i>Bone</i> 2010;1):S63-S64.                                                                   | Wrong outcomes                         |
| 12. | Adami   | 2010<br>a | Adami, S.; Libanati, C.; Adachi, J.; Boonen, S.; Cummings, S.; De Gregorio, L.; Gilchrist, N.; Lyritis, G.; Moeller, G.; Palacios, S.; Pavelka, K.; Resch, H.; Roux, C.; Uebelhart, D.; Wang, A.; Siris, E.. Denosumab administration is not associated with fracture healing complications in postmenopausal women with osteoporosis: Results from the freedom trial. <i>Journal of Bone and Mineral Research</i> 2010;1):S478-S479. | Conference abstract                    |
| 13. | Adami   | 2011      | Adami, S.; Palacios, S.; Pavelka, K.; Resch, H.; Roux, C.; Uebelhart, D.; Ho, P. R.; Wang, A.; Siris, E.; Libanati, C.; Adachi, J.; Boonen, S.; Cummings, S.; De Gregorio, L.; Gilchrist, N.; Lyritis, G.; Moeller, G. Freedom trial: Denosumab is not associated with fracture healing complications in postmenopausal women with osteoporosis. <i>Osteoporosis International</i> March 2011;1():S243-S244                           | Conference abstract                    |
| 14. | Adami   | 2014      | Adami, S.; Palacios, S.; Rizzoli, R.; Levine, A. B.; Sutradhar, S.; Chines, A. A. The efficacy and safety of bazedoxifene in postmenopausal women by baseline kidney function status. <i>Climacteric</i> June 2014;17(3):273-284                                                                                                                                                                                                      | Systematic review and/or meta-analysis |
| 15. | Adami   | 2019      | Adami, Giovanni; Saag, Kenneth G.; Chapurlat, Roland D.; Guanabens, Nuria; Haugeberg, Glenn; Lems, Willem F.; Matijevic, Radmila; Peel, Nicola; Poddubnyy, Denis; Geusens, Piet. Balancing benefits and risks in the era of biologics. <i>Therapeutic Advances in Musculoskeletal Disease</i> 2019;11:1-6. United Kingdom SAGE Publications Ltd (E-mail: info@sagepub.co.uk) 2019                                                     | Systematic review and/or meta-analysis |
| 16. | Agrawal | 2006      | Agrawal, S.; Krueger, D. C.; Engelke, J. A.; Nest, L. J.; Krause, P. F.; Drinka, P. J.; Binkley, N. C.. Between-meal risedronate does not alter bone turnover in nursing home residents. <i>Journal of the American Geriatrics Society</i> 2006;54(5):790-795.                                                                                                                                                                        | Wrong patient population               |
| 17. | Agrawal | 2009      | Agrawal, S.; Jain, A.; Mahajan, D.; Raghunandan, C. Correlation of bone mineral density with                                                                                                                                                                                                                                                                                                                                          | Wrong outcomes                         |

| No. | Authors       | Year | Reference (extracted from covidence)                                                                                                                                                                                                                                                                                                                                                                                                    | Reasons for exclusion                  |
|-----|---------------|------|-----------------------------------------------------------------------------------------------------------------------------------------------------------------------------------------------------------------------------------------------------------------------------------------------------------------------------------------------------------------------------------------------------------------------------------------|----------------------------------------|
|     |               |      | biochemical markers in post menopausal women. Indian Journal of Clinical Biochemistry July 2009;24(3):262-265                                                                                                                                                                                                                                                                                                                           |                                        |
| 18. | Albert        | 2021 | Albert, Stewart G.; Wood, Emily. Meta-Analysis of Clinical Fracture Risk Reduction of Antiosteoporosis Drugs: Direct and Indirect Comparisons and Meta-Regressions. Endocrine practice: official journal of the American College of Endocrinology and the American Association of Clinical Endocrinologists 2021;27(11):1082-1092                                                                                                       | Systematic review and/or meta-analysis |
| 19. | Almirol       | 2016 | Almirol, E. A.; Chi, L. Y.; Khurana, B.; Hurwitz, S.; Bluman, E. M.; Chiodo, C.; Matzkin, E.; Baima, J.; Leboff, M. S.. Short-term effects of teriparatide versus placebo on bone biomarkers, structure, and fracture healing in women with lower-extremity stress fractures: A pilot study. Journal of Clinical and Translational Endocrinology 2016;5:7-14.                                                                           | Wrong patient population               |
| 20. | Altkorn       | 2001 | Altkorn, D.; Vokes, T. Treatment of postmenopausal osteoporosis. Journal of the American Medical Association 2001;285(11):1415-1418                                                                                                                                                                                                                                                                                                     | Systematic review and/or meta-analysis |
| 21. | Aminorroaya   | 2019 | Aminorroaya, Ashraf; Kachuei, Ali; Amini, Massoud; Karimi Fard, Maryam; Salamat, Mohammad Reza; Hadi Alijanvand, Moluk; Feizi, Awat; Aminorroaya Yamini, Sima; Karimifar, Mansoor. Alendronate improves fasting plasma glucose and insulin sensitivity, and decreases insulin resistance in prediabetic osteopenic postmenopausal women: A randomized triple-blind clinical trial. Journal of diabetes investigation 2019;10(3):731-737 | Wrong outcomes                         |
| 22. | Anastasilakis | 2008 | Anastasilakis, A. D.; Goulis, D. G.; Polyzos, S. A.; Gerou, S.; Koukoulis, G. N.; Efstathiadou, Z.; Kita, M.; Avramidis, A.. Head-to-head comparison of risedronate vs. teriparatide on bone turnover markers in women with postmenopausal osteoporosis: A randomised trial. International Journal of Clinical Practice 2008;62(6):919-924.                                                                                             | Wrong outcomes                         |
| 23. | Anastasilakis | 2009 | Anastasilakis, A. D.; Toulis, K. A.; Goulis, D. G.; Polyzos, S. A.; Delaroudis, S.; Giomisi, A.; Terpos, E.. Efficacy and safety of denosumab in postmenopausal women with osteopenia or osteoporosis: A systematic review and a meta-analysis. Hormone and Metabolic Research 2009;41(10):721-729.                                                                                                                                     | Systematic review and/or meta-analysis |
| 24. | Anastasilakis | 2019 | Anastasilakis, A. D.; Papapoulos, S. E.; Polyzos, S. A.; Appelman-Dijkstra, N. M.; Makras, P. Zoledronate for the Prevention of Bone Loss in Women Discontinuing Denosumab Treatment. A Prospective 2-Year Clinical Trial. Journal of Bone and Mineral Research. 2019                                                                                                                                                                   | Wrong intervention                     |
| 25. | Anastasilakis | 2021 | Anastasilakis, Athanasios D.; Mandanas, Stylianos; Polyzos, Stergios A.; Ntenti, Charikleia; Appelman-Dijkstra, Natasha M.; Yavropoulou, Maria P.;                                                                                                                                                                                                                                                                                      | Extension study                        |

| No. | Authors   | Year      | Reference (extracted from covidence)                                                                                                                                                                                                                                                                                                | Reasons for exclusion                  |
|-----|-----------|-----------|-------------------------------------------------------------------------------------------------------------------------------------------------------------------------------------------------------------------------------------------------------------------------------------------------------------------------------------|----------------------------------------|
|     |           |           | Papatheodorou, Athanasios; Makras, Polyzois. Comparative Effect of Zoledronate at 6 Versus 18 Months Following Denosumab Discontinuation. <i>Calcified tissue international</i> 2021;108(5):587-594                                                                                                                                 |                                        |
| 26. | Anonymous | 2001      | Anonymous. Osteoporosis – Risedronate. <i>Manufacturing Chemist</i> 2001;72(1):23                                                                                                                                                                                                                                                   | Conference abstract                    |
| 27. | Anonymous | 2003      | Anonymous. Teriparatide (forteo) for osteoporosis <i>Medical Letter on Drugs &amp; Therapeutics</i> 2003;45(1149):9-10                                                                                                                                                                                                              | Commentary                             |
| 28. | Anonymous | 2006      | Anonymous. Intravenous ibandronate (Boniva). <i>The Medical letter on drugs and therapeutics</i> 2006 Aug 2006;48(1241-1242):68-69                                                                                                                                                                                                  | Commentary                             |
| 29. | Anonymous | 2008      | Anonymous. Twice-monthly risedronate is as effective as daily dosing for osteoporosis therapy <i>Nature Clinical Practice Endocrinology and Metabolism</i> October 2008;4(10):535                                                                                                                                                   | Wrong outcomes                         |
| 30. | Anonymous | 2008<br>a | Anonymous. The benefits of osteoporosis drugs <i>Australian Journal of Pharmacy</i> May 2008;89(1057):92                                                                                                                                                                                                                            | Commentary                             |
| 31. | Anonymous | 2008<br>b | Anonymous. Annual zoledronic acid for osteoporosis. <i>Drug and therapeutics bulletin</i> Dec 2008;46(12):93-96                                                                                                                                                                                                                     | Systematic review and/or meta-analysis |
| 32. | Anonymous | 2009      | Anonymous. Teriparatide: new indication. During corticosteroid therapy: no fewer clinical fractures. Unnecessarily inconvenient. <i>Prescrire International</i> Aug 2009;18(102):159                                                                                                                                                | Conference abstract                    |
| 33. | Anonymous | 2019      | Anonymous. Practical guidance for use of bisphosphonates in osteoporosis. <i>JBMR Plus</i> 2019;3(Supplement 3):20                                                                                                                                                                                                                  | Systematic review and/or meta-analysis |
| 34. | Anonymous | 2019<br>a | Anonymous. Ibandronate is a nitrogen-containing bisphosphonate. <i>JBMR Plus</i> 2019;3(Supplement 3):29                                                                                                                                                                                                                            | Full-text not available                |
| 35. | Archer    | 2016      | Archer, D. F.; Freeman, E. W.; Komm, B. S.; Ryan, K. A.; Yu, C. R.; Mirkin, S.; Pinkerton, J. V.. Pooled Analysis of the Effects of Conjugated Estrogens /Bazedoxifene on Vasomotor Symptoms in the Selective Estrogens, Menopause, and Response to Therapy Trials. <i>Journal of Women's Health</i> November 2016;25(11):1102-1111 | Systematic review and/or meta-analysis |
| 36. | Aro       | 2018      | Aro, E.; Moritz, N.; Mattila, K.; Aro, H. T. A long-lasting bisphosphonate partially protects periprosthetic bone, but does not enhance initial stability of uncemented femoral stems: A randomized placebo-controlled trial of women undergoing total hip arthroplasty. <i>Journal of Biomechanics</i> 25 June 2018;75():35-45     | Wrong patient population               |
| 37. | Asaoka    | 2016      | Asaoka, D.; Nagahara, A.; Hojo, M.; Ueyama, H.; Matsumoto, K.; Izumi, K.; Takeda, T.; Komori, H.; Akazawa, Y.; Shimada, Y.; Osada, T.; Watanabe, S.. Efficacy of alfacalcidol and alendronate on lumbar bone mineral density in osteoporotic patients using proton pump inhibitors. <i>Biomedical Reports</i> 2016;5(2):165-170.    | Wrong patient population               |

| No. | Authors   | Year | Reference (extracted from covidence)                                                                                                                                                                                                                                                                                                                                                                                                                                                        | Reasons for exclusion                  |
|-----|-----------|------|---------------------------------------------------------------------------------------------------------------------------------------------------------------------------------------------------------------------------------------------------------------------------------------------------------------------------------------------------------------------------------------------------------------------------------------------------------------------------------------------|----------------------------------------|
| 38. | Asi       | 2019 | Asi, Noor; Alahdab, Fares; Mohammed, Khaled; Almasri, Jihad; Farah, Wigdan; Sarigianni, Maria; Muthusamy, Kalpana; Haydour, Qusay; Wang, Zhen; Murad, Mohammad Hassan; Barrionuevo, Patricia; Kapoor, Ekta; Benkhadra, Khalid; Al Nofal, Alaa. Efficacy of pharmacological therapies for the prevention of fractures in postmenopausal women: A network meta-analysis. <i>Journal of Clinical Endocrinology and Metabolism</i> 2019;104(5):1623-1630                                        | Systematic review and/or meta-analysis |
| 39. | Aspenberg | 2010 | Aspenberg, P.; Johansson, T.. Teriparatide improves early callus formation in distal radial fractures: Analysis of a subgroup of patients within a randomized trial: Analysis of a subgroup of patients within a randomized trial. <i>Acta Orthopaedica</i> April 2010;81(2):236-238                                                                                                                                                                                                        | Wrong outcomes                         |
| 40. | Aspenberg | 2016 | Aspenberg, P.; Malouf, J.; Tarantino, U.; Garcia-Hernandez, P. A.; Corradini, C.; Overgaard, S.; Stepan, J. J.; Borris, L.; Lespessailles, E.; Frihagen, F.; Papavasiliou, K.; Petto, H.; Caeiro, J. R.; Marin, F.. Effects of teriparatide compared with risedronate on recovery after pertrochanteric hip fracture results of a randomized, active-controlled, double-blind clinical trial at 26 weeks. <i>Journal of Bone and Joint Surgery - American Volume</i> 2016;98(22):1868-1878. | Wrong patient population               |
| 41. | Aubailly  | 2016 | Aubailly, M.; Combe, B.; Gaujoux-Viala, C.; Lukas, C.; Morel, J.; Che, H.. Safety of denosumab in postmenopausal osteoporosis and in cancer and bone metastase treatment: A systematic review and meta-analysis. <i>Arthritis and Rheumatology</i> October 2016;68 (Supplement 10):419-420                                                                                                                                                                                                  | Conference abstract                    |
| 42. | Bai       | 2013 | Bai, H.; Jing, D.; Guo, A.; Yin, S.. Randomized controlled trial of zoledronic acid for treatment of osteoporosis in women. <i>Journal of International Medical Research</i> 2013;41(3):697-704.                                                                                                                                                                                                                                                                                            | Wrong patient population               |
| 43. | Bala      | 2013 | Bala, Y.; Chapurlat, R.; Felsenberg, D.; Thomas, T.; Laroche, M.; Morris, E.; Zanchetta, J.; Cheung, A.; Ghasem-Zadeh, A.; Zebaze, R.; Seeman, E.; Rizzoli, R.. Risedronate slows or partly reverses microarchitecture deterioration depending on whether remodelling is perturbed or in steady state. <i>Osteoporosis International</i> April 2013;1):S58-S59                                                                                                                              | Conference abstract                    |
| 44. | Bala      | 2014 | Bala, Y.; Chapurlat, R.; Cheung, A. M.; Felsenberg, D.; Laroche, M.; Morris, E.; Reeve, J.; Thomas, T.; Zanchetta, J.; Bock, O.; Ghasem-Zadeh, A.; Djoumessi, R. M. Z.; Seeman, E.; Rizzoli, R.. Risedronate slows or partly reverses cortical and trabecular microarchitectural deterioration in postmenopausal women. <i>Journal of Bone and Mineral Research</i> February 2014;29(2):380-388                                                                                             | Wrong outcomes                         |

| No. | Authors     | Year | Reference (extracted from covidence)                                                                                                                                                                                                                                                                                                                                                            | Reasons for exclusion                  |
|-----|-------------|------|-------------------------------------------------------------------------------------------------------------------------------------------------------------------------------------------------------------------------------------------------------------------------------------------------------------------------------------------------------------------------------------------------|----------------------------------------|
| 45. | Baran       | 2001 | Baran, D.. Osteoporosis: Efficacy and safety of a bisphosphonate dosed once weekly. <i>Geriatrics</i> 2001;56(3):28-32                                                                                                                                                                                                                                                                          | Systematic review and/or meta-analysis |
| 46. | Barrionuevo | 2019 | Barrionuevo, P.; Kapoor, E.; Asi, N.; Alahdab, F.; Mohammed, K.; Benkhadra, K.; Almasri, J.; Farah, W.; Sarigianni, M.; Muthusamy, K.; Al Nofal, A.; Haydour, Q.; Wang, Z.; Murad, M. H.. Efficacy of pharmacological therapies for the prevention of fractures in postmenopausal women: A network meta-analysis. <i>Journal of Clinical Endocrinology and Metabolism</i> 2019;104(5):1623-1630 | Systematic review and/or meta-analysis |
| 47. | Bassam      | 2003 | Bassam, E.. Treatment of osteoporosis; HRT, SERM or bisphosphonates? <i>Middle East Fertility Society Journal</i> 2003;8(1):92                                                                                                                                                                                                                                                                  | Commentary                             |
| 48. | Beaudoin    | 2016 | Beaudoin, C.; Jean, S.; Bessette, L.; Ste-Marie, L. G.; Moore, L.; Brown, J. P.. Denosumab compared to other treatments to prevent or treat osteoporosis in individuals at risk of fracture: a systematic review and meta-analysis. <i>Osteoporosis International</i> 2016;27(9):2835-2844.                                                                                                     | Systematic review and/or meta-analysis |
| 49. | Beaupre     | 2011 | Beaupre, L. A.; Morrish, D. W.; Hanley, D. A.; Maksymowych, W. P.; Bell, N. R.; Juby, A. G.; Majumdar, S. R.. Oral bisphosphonates are associated with reduced mortality after hip fracture. <i>Osteoporosis International</i> 2011;22(3):983-991.                                                                                                                                              | Wrong patient population               |
| 50. | Beaupre     | 2010 | Beaupre, L. A.; Morrish, D.; Hanley, D. A.; Juby, A. G.; Maksymowych, W. P.; Bell, N. R.; Majumdar, S. R. Oral bisphosphonate use after hip fracture is associated with reduced mortality. <i>Osteoporosis International</i> May 2010;1():S337                                                                                                                                                  | Wrong patient population               |
| 51. | Beck        | 2008 | Beck, T. J.; Michael Lewiecki, E.; Miller, P. D.; Felsenberg, D.; Liu, Y.; Ding, B.; Libanati, C.. Effects of Denosumab on the Geometry of the Proximal Femur in Postmenopausal Women in Comparison with Alendronate. <i>Journal of Clinical Densitometry</i> 2008;11(3):351-359.                                                                                                               | Wrong outcomes                         |
| 52. | Beekman     | 2019 | Beekman, Kerensa M.; Veldhuis-Vlug, Annegreet G.; den Heijer, Martin; Maas, Mario; Oleksik, Ania M.; Tanck, Michael W.; Ott, Susan M.; van 't Hof, Rob J.; Lips, Paul; Bisschop, Peter H.; Bravenboer, Nathalie. The effect of raloxifene on bone marrow adipose tissue and bone turnover in postmenopausal women with osteoporosis. <i>Bone</i> 2019;118():62-68                               | Wrong outcomes                         |
| 53. | Bekker      | 2004 | Bekker, P. J.; Holloway, D. L.; Rasmussen, A. S.; Murphy, R.; Martin, S. W.; Leese, P. T.; Holmes, G. B.; Dunstan, C. R.; DePaoli, A. M.. A single-dose placebo-controlled study of AMG 162, a fully human monoclonal antibody to RANKL, in postmenopausal women. <i>Journal of Bone and Mineral Research</i> 2004;19(7):1059-1066.                                                             | Wrong outcomes                         |



| No. | Authors    | Year      | Reference (extracted from covidence)                                                                                                                                                                                                                                                                                                                                                           | Reasons for exclusion                  |
|-----|------------|-----------|------------------------------------------------------------------------------------------------------------------------------------------------------------------------------------------------------------------------------------------------------------------------------------------------------------------------------------------------------------------------------------------------|----------------------------------------|
| 54. | Bellone    | 2021      | Bellone, F.; Morabito, N.; Sottile, A.; Loddo, S.; Corica, F.; Catalano, A.; Gaudio, A. A single dose of zoledronate induces modifications of serum VEGF in osteoporotic postmenopausal women. <i>Annals of the Rheumatic Diseases</i> 2021;80(SUPPL 1):838-839                                                                                                                                | Conference abstract, with no new data  |
| 55. | Bender     | 2012      | Bender, D. A.. Bisphosphonate and vitamin D supplementation for osteoporosis. Focus on Alternative and Complementary Therapies March 2012;17(1):73-74                                                                                                                                                                                                                                          | Wrong intervention                     |
| 56. | Bilezikian | 2005      | Bilezikian, J. P.. Anabolic therapy for osteoporosis. <i>International Journal of Fertility and Women's Medicine</i> 2005 2005;50(2):53-60                                                                                                                                                                                                                                                     | Systematic review and/or meta-analysis |
| 57. | Billington | 2020      | Billington, Emma O.; Reid, Ian R. Benefits of Bisphosphonate Therapy: Beyond the Skeleton. <i>Current osteoporosis reports</i> 2020;18(5):587-596                                                                                                                                                                                                                                              | Systematic review and/or meta-analysis |
| 58. | Black      | 1999      | Black, D. M.; Thompson, D. E.. The effect of alendronate therapy on osteoporotic fracture in the vertebral fracture arm of the Fracture Intervention Trial. <i>International Journal of Clinical Practice, Supplement</i> 1999;(101):46-50.                                                                                                                                                    | Conference abstract                    |
| 59. | Black      | 2009      | Black, D. M.; Eastell, R.; Cosman, F.; Man, Z.; Bucci-Rechtweg, C.; Mesenbrink, P. Effect of once-yearly zoledronic acid 5 mg on 'Super Six' non-vertebral fractures. <i>Bone</i> June 2009;2():S429                                                                                                                                                                                           | Conference abstract                    |
| 60. | Black      | 2006      | Black, D. M.. Building new bone: A new paradigm in osteoporosis. <i>Clinical Cases in Mineral and Bone Metabolism</i> September/December 2006;3(3):243-244                                                                                                                                                                                                                                     | Conference abstract                    |
| 61. | Black      | 2010      | Black, D. M.; Eastell, R.; Cosman, F.; Man, Z.; Bucci-Rechtweg, C.; Mesenbrink, P.. Effect of once-yearly zoledronic acid = MG on a sub-set of six non-vertebral fractures. <i>Journal of Clinical Densitometry</i> 2010;13 (1):132.                                                                                                                                                           | Conference abstract                    |
| 62. | Black      | 2010<br>b | Black, D. M.; Seeman, E.; Bucci-Rechtweg, C.; Eastell, R.; Boonen, S.; Mesenbrink, P. Zoledronic acid reduces the increased risk conferred by further fractures. <i>Internal Medicine Journal</i> May 2010;3():27                                                                                                                                                                              | Conference abstract                    |
| 63. | Black      | 2010<br>a | Black, D.; Reid, I.; Lyles, K.; Bucci-Rechtweg, C.; Su, G.; Hue, T.; Eastell, R.. Reduction in the risk of clinical fractures after a single dose of zoledronic acid 5mg. <i>Journal of Bone and Mineral Research</i> 2010;1():S10.                                                                                                                                                            | Wrong patient population               |
| 64. | Black      | 2017      | Black, D.; Eastell, R.; Bauer, D.; Lui, L. Y.; McCulloch, C.; De Papp, A.; Khosla, S.; Hoffmann, S.; Bouxsein, M.. Change in BMD over 12 to 24 months is strongly associated with fracture reductions in randomized trials: A study-level meta-regression using the FNIH Bone quality study project database. <i>Journal of Bone and Mineral Research</i> December 2017;32 (Supplement 1):S400 | Conference abstract                    |
| 65. | Black      | 2017<br>a | Black, D. M.; Mitlak, B. H.; Wang, Y.; Hu, M. Y.; Fitzpatrick, L. A.; Eastell, R.. Early change in serum                                                                                                                                                                                                                                                                                       | Conference abstract                    |

| No. | Authors   | Year | Reference (extracted from covidence)                                                                                                                                                                                                                                                                                                                                                                                                                                                                                                                                       | Reasons for exclusion                  |
|-----|-----------|------|----------------------------------------------------------------------------------------------------------------------------------------------------------------------------------------------------------------------------------------------------------------------------------------------------------------------------------------------------------------------------------------------------------------------------------------------------------------------------------------------------------------------------------------------------------------------------|----------------------------------------|
|     |           |      | PINP During treatment with abaloparatide is correlated with lumbar spine BMD: Results from the ACTIVE Trial. Journal of Bone and Mineral Research December 2017;32 (Supplement 1):S377-S378                                                                                                                                                                                                                                                                                                                                                                                |                                        |
| 66. | Black     | 2020 | Black, Dennis M.; Bauer, Douglas C.; Vittinghoff, Eric; Lui, Li-Yung; Grauer, Andreas; Marin, Fernando; Khosla, Sundeep; de Papp, Anne; Mitlak, Bruce; Cauley, Jane A.; McCulloch, Charles E.; Eastell, Richard; Bouxsein, Mary L.; Foundation for the National Institutes of Health Bone Quality, Project. Treatment-related changes in bone mineral density as a surrogate biomarker for fracture risk reduction: meta-regression analyses of individual patient data from multiple randomised controlled trials. The lancet. Diabetes & endocrinology 2020;8(8):672-682 | Systematic review and/or meta-analysis |
| 67. | Blouin    | 2009 | Blouin, S.; Misof, B. M.; Fratzl-Zelman, N.; Phipps, R.; Klaushofer, K.; Paschalis, E. P.; Roschger, P. Normal bone mineralization density distribution in postmenopausal osteoporosis with low bone turnover before and after 3 years risedronate treatment. Bone June 2009;2():S445-S446                                                                                                                                                                                                                                                                                 | Conference abstract                    |
| 68. | Boivin    | 2003 | Boivin, G.; Lips, P.; Ott, S. M.; Harper, K. D.; Sarkar, S.; Pinette, K. V.; Meunier, P. J.. Contribution of raloxifene and calcium and vitamin D3 supplementation to the increase of the degree of mineralization of bone in postmenopausal women. Journal of Clinical Endocrinology & Metabolism 2003;88(9):4199-205.                                                                                                                                                                                                                                                    | Wrong outcomes                         |
| 69. | Bolland   | 2010 | Bolland, M. J.; Grey, A. B.; Gamble, G. D.; Reid, I. R.. Effect of osteoporosis treatment on mortality: A meta-analysis. Journal of Clinical Endocrinology and Metabolism 2010;95(3):1174-1181.                                                                                                                                                                                                                                                                                                                                                                            | Systematic review and/or meta-analysis |
| 70. | Bolognese | 2011 | Bolognese, M. A.; Bone, H. G.; Kendler, D. L.; Brandi, M. L.; Hodsman, A.; Orcel, P.; Radcliffe, H. S.. Transitioning to denosumab leads to further increases in BMD throughout the skeleton in postmenopausal women who received 5 or more years of continuous alendronate therapy. Arthritis and Rheumatism. Conference: Annual Scientific Meeting of the American College of Rheumatology and Association of Rheumatology Health Professionals 2011;63(10 SUPPL. 1).                                                                                                    | Conference abstract                    |
| 71. | Bone      | 2004 | Bone, H. G.; Hosking, D.; Devogelaer, J. P.; Tucci, J. R.; Emkey, R. D.; Tonino, R. P.; Rodriguez-Portales, J. A.; Downs, R. W.; Gupta, J.; Santora, A. C.; Liberman, U. A.. Ten Years' Experience with Alendronate for Osteoporosis in Postmenopausal Women. New England Journal of Medicine 2004;350(12):1189-1199.                                                                                                                                                                                                                                                      | Extension study                        |
| 72. | Bone      | 2011 | Bone, H. G.; Kendler, D. L.; Bolognese, M. A.; Brandi, M. L.; Hodsman, A.; Orcel, P.; Austin, M.;                                                                                                                                                                                                                                                                                                                                                                                                                                                                          | Conference abstract                    |

| No. | Authors | Year      | Reference (extracted from covidence)                                                                                                                                                                                                                                                                                                                                                                                      | Reasons for exclusion                  |
|-----|---------|-----------|---------------------------------------------------------------------------------------------------------------------------------------------------------------------------------------------------------------------------------------------------------------------------------------------------------------------------------------------------------------------------------------------------------------------------|----------------------------------------|
|     |         |           | Grauer, A.; Libanati, C.. Transitioning to denosumab further improves BMD in postmenopausal women who received 5 or more years of continuous alendronate therapy. Endocrine Reviews. Conference: 93rd Annual Meeting and Expo of the Endocrine Society, ENDO 2011;32(3 Meeting Abstracts)                                                                                                                                 |                                        |
| 73. | Bonnick | 2009      | Bonnick, S. L.; Silverman, S.; Tanner, S. B.; Martens, M.; Bachmann, G.; Kohles, J. D.; Civitelli, R.. Patient satisfaction in postmenopausal women treated with a weekly bisphosphonate transitioned to once-monthly ibandronate. Journal of Women's Health 01 Jul 2009;18(7):935-943                                                                                                                                    | Wrong study design                     |
| 74. | Boonen  | 2010      | Boonen, S.; Lippuner, K.; Adachi, J. D.; Cummings, S.; Man, Z.; Farrerons, J.; Torring, O.; Gallagher, J. C.; Franchimont, N.; San Martin, J.; Wang, A.; McClung, M. Denosumab reduced the incidence of hip and new vertebral fractures in postmenopausal women with higher fracture risk: A subanalysis of the FREEDOM study. Osteoporosis International December 2010;5():S746-S747                                     | Conference abstract                    |
| 75. | Boonen  | 2008      | Boonen, S.; Marin, F.; Obermayer-Pietsch, B.; Simoes, M. E.; Barker, C.; Glass, E. V.; Hadji, P.; Lyritis, G.; Oertel, H.; Nickelsen, T.; McCloskey, E. V.. Effects of previous antiresorptive therapy on the bone mineral density response to two years of teriparatide treatment in postmenopausal women with osteoporosis. Journal of Clinical Endocrinology and Metabolism 2008;93(3):852-860.                        | Wrong outcomes                         |
| 76. | Boonen  | 2010      | Boonen, S.; McClung, M.; Minisola, S.; Lippuner, K.; Torring, O.; Rizzoli, R.; Man, Z.; Bone, H.; Farrerons, J.; Adachi, J.; Christiansen, C.; Eastell, R.; Reid, I.; Siris, E.; Cummings, S.; Wang, A.; Franchimont, N.; San Martin, J. Antifracture effects of denosumab in postmenopausal women at higher fracture risk: A subgroup analysis from the freedom trial. Osteoporosis International May 2010;1():S376-S377 | Conference abstract                    |
| 77. | Boonen  | 2008<br>a | Boonen, S.; Vanderschueren, D.; Venken, K.; Milisen, K.; Delforge, M.; Haentjens, P.. Recent developments in the management of postmenopausal osteoporosis with bisphosphonates: Enhanced efficacy by enhanced compliance. Journal of Internal Medicine October 2008;264(4):315-332                                                                                                                                       | Systematic review and/or meta-analysis |
| 78. | Boonen  | 2011      | Boonen, S.; Orwoll, E.; Magaziner, J.; Colon-Emeric, C. S.; Adachi, J. D.; Bucci-Rechtweg, C.; Haentjens, P.; Kaufman, J. M.; Rizzoli, R.; Vanderschueren, D.; Claessens, F.; Sermon, A.; Witvrouw, R.; Milisen, K.; Su, G.; Lyles, K. W.. Once-yearly zoledronic acid in older men compared with women with recent hip fracture. Journal of the American Geriatrics Society 2011;59(11):2084-2090.                       | Wrong patient population               |

| No. | Authors   | Year | Reference (extracted from covidence)                                                                                                                                                                                                                                                                                                                                                           | Reasons for exclusion |
|-----|-----------|------|------------------------------------------------------------------------------------------------------------------------------------------------------------------------------------------------------------------------------------------------------------------------------------------------------------------------------------------------------------------------------------------------|-----------------------|
| 79. | Borah     | 2004 | Borah, B.; Dufresne, T. E.; Chmielewski, P. A.; Johnson, T. D.; Chines, A.; Manhart, M. D.. Risedronate preserves bone architecture in postmenopausal women with osteoporosis as measured by three-dimensional microcomputed tomography. <i>Bone</i> 2004;34(4):736-46                                                                                                                         | Wrong outcomes        |
| 80. | Borah     | 2005 | Borah, B.; Ritman, E. L.; Dufresne, T. E.; Jorgensen, S. M.; Liu, S.; Sacha, J.; Phipps, R. J.; Turner, R. T.. The effect of risedronate on bone mineralization as measured by micro-computed tomography with synchrotron radiation: correlation to histomorphometric indices of turnover. <i>Bone</i> 2005;37(1):1-9                                                                          | Wrong outcomes        |
| 81. | Borah     | 2006 | Borah, B.; Dufresne, T. E.; Ritman, E. L.; Jorgensen, S. M.; Liu, S.; Chmielewski, P. A.; Phipps, R. J.; Zhou, X.; Sibonga, J. D.; Turner, R. T.. Long-term risedronate treatment normalizes mineralization and continues to preserve trabecular architecture: sequential triple biopsy studies with micro-computed tomography. <i>Bone</i> 2006;39(2):345-52                                  | Wrong outcomes        |
| 82. | Borah     | 2010 | Borah, B.; Dufresne, T.; Nurre, J.; Phipps, R.; Chmielewski, P.; Wagner, L.; Lundy, M.; Bouxsein, M.; Zebaze, R.; Seeman, E.. Risedronate reduces intracortical porosity in women with osteoporosis. <i>Journal of Bone &amp; Mineral Research</i> 2010;25(1):41-7                                                                                                                             | Wrong outcomes        |
| 83. | Borgstrom | 2004 | Borgstrom, F.; Johnell, O.; Kanis, J. A.; Oden, A.; Sykes, D.; Jonsson, B.. Cost effectiveness of raloxifene in the treatment of osteoporosis in Sweden: An economic evaluation based on the MORE study. <i>Pharmacoeconomics</i> 2004;22(17):1153-1165                                                                                                                                        | Wrong outcomes        |
| 84. | Borst     | 2010 | Borst, H.; Bock, O.; Beller, G.; Kratzsch, M.; Degner, C.; Profittlich, H.; Kalbow, M.; Armbrrecht, G.; Martus, P.; Glaab, J.; Felsenberg, D.. Monthly oral ibandronate 150 mg improves significantly bone density and structure measured in Vivo by Micro-CT at distal tibia in postmenopausal women with mild osteoporosis. <i>Bone</i> 2010;1:S195.                                         | Conference abstract   |
| 85. | Borst     | 2010 | Borst, H.; Bock, O.; Beller, G.; Kratzsch, M.; Degner, C.; Profittlich, H.; Kalbow, M.; Armbrrecht, G.; Martus, P.; Glaab, J.; Felsenberg, D. Effects of monthly oral ibandronate 150 MG on BV/TV and trabecular separation measured in vivo by micro-CT at the distal tibia in postmenopausal women with osteoporosis or osteopenia. <i>Osteoporosis International</i> May 2010;1():S164-S165 | Wrong outcomes        |
| 86. | Bouxsein  | 2017 | Bouxsein, M. L.; Keaveny, T. M.; Lee, D. C.; Khosla, S.; De Papp, A.; Eastell, R.; Lui, L. Y.; Bauer, D. C.; Black, D. M.. Relationship between femoral strength from QCT-based finite element analysis and femoral BMD before and after treatment: An Analysis from the FNIH Bone Quality Project.                                                                                            | Conference abstract   |

| No. | Authors  | Year      | Reference (extracted from covidence)                                                                                                                                                                                                                                                                                                                                                                                                                                                                                                     | Reasons for exclusion                  |
|-----|----------|-----------|------------------------------------------------------------------------------------------------------------------------------------------------------------------------------------------------------------------------------------------------------------------------------------------------------------------------------------------------------------------------------------------------------------------------------------------------------------------------------------------------------------------------------------------|----------------------------------------|
|     |          |           | Journal of Bone and Mineral Research December 2017;32 (Supplement 1):S53                                                                                                                                                                                                                                                                                                                                                                                                                                                                 |                                        |
| 87. | Bovbjerg | 2021      | Bovbjerg, Pernille; Froberg, Lonnie; Høgh, Ditte; Schmal, Hagen; Kassem, Moustapha. Effect of PTH treatment on bone healing in insufficiency fractures of the pelvis: a systematic review. EFORT Open Reviews 2021;6(1):9-14                                                                                                                                                                                                                                                                                                             | Wrong outcomes                         |
| 88. | Bovijn   | 2020      | Bovijn, Jonas; Krebs, Kristi; Chen, Chia-Yen; Boxall, Ruth; Censin, Jenny C.; Ferreira, Teresa; Pulit, Sara L.; Glastonbury, Craig A.; Laber, Samantha; Millwood, Iona Y.; Lin, Kuang; Li, Liming; Chen, Zhengming; Milani, Lili; Smith, George Davey; Walters, Robin G.; Magi, Reedik; Neale, Benjamin M.; Lindgren, Cecilia M.; Holmes, Michael V. Evaluating the cardiovascular safety of sclerostin inhibition using evidence from meta-analysis of clinical trials and human genetics. Science translational medicine 2020;12(549): | Systematic review and/or meta-analysis |
| 89. | Brandao  | 2008      | Brandao, C. M.; Lima, M. G.; Silva, A. L.; Silva, G. D.; Guerra, A. A., Jr.; Acurcio Fde, A.. Treatment of postmenopausal osteoporosis in women: a systematic review. Cadernos de Saude Publica 2008;24 Suppl 4:s592-606                                                                                                                                                                                                                                                                                                                 | Systematic review and/or meta-analysis |
| 90. | Brandi   | 2000      | Brandi, M. L.. Raloxifene reduces vertebral fracture risk in postmenopausal women with osteoporosis. Clinical & Experimental Rheumatology 2000;18(3):309-10                                                                                                                                                                                                                                                                                                                                                                              | Commentary                             |
| 91. | Brandi   | 2008      | Brandi, M. L.. Is yearly intravenous zoledronic acid comparable to weekly oral alendronate for postmenopausal osteoporosis? Nature Clinical Practice Endocrinology and Metabolism January 2008;4(1):20-21                                                                                                                                                                                                                                                                                                                                | Commentary                             |
| 92. | Brown    | 2002      | Brown, J. P.; Kendler, D. L.; McClung, M. R.; Emkey, R. D.; Adachi, J. D.; Bolognese, M. A.; Li, Z.; Balske, A.; Lindsay, R. The efficacy and tolerability of risedronate once a week for the treatment of postmenopausal osteoporosis. Calcified Tissue International 2002;71(2):103-11                                                                                                                                                                                                                                                 | Wrong outcomes                         |
| 93. | Brown    | 2013      | Brown, J. P.; Bolognese, M. A.; Ho, P. R.; Hall, J.; Roux, C.; Bone, H. G.; Bonnick, S.; Van Den Bergh, J.; Ferreira, I.; Ghelani, P.; Dakin, P.; Wagman, R. B.; Recknor, C.. Denosumab significantly increases bone mineral density compared with ibandronate and risedronate in postmenopausal women previously treated with an oral bisphosphonate who are at higher risk for fracture. Journal of Bone and Mineral Research. Conference 2013;28(SUPPL. 1).                                                                           | Conference abstract                    |
| 94. | Brown    | 2013<br>a | Brown, J. P.; Bolognese, M. A.; Ho, P. R.; Hall, J.; Roux, C.; Bone, H. G.; Bonnick, S.; Van Den Bergh, J.; Ferreira, I.; Ghelani, P.; Dakin, P.; Wagman, R. B.; Recknor, C.. Denosumab leads to significantly greater increases in bone mineral density than                                                                                                                                                                                                                                                                            | Wrong outcomes                         |

| No.  | Authors | Year      | Reference (extracted from covidence)                                                                                                                                                                                                                                                                                                                                                                                                                                                                          | Reasons for exclusion                                     |
|------|---------|-----------|---------------------------------------------------------------------------------------------------------------------------------------------------------------------------------------------------------------------------------------------------------------------------------------------------------------------------------------------------------------------------------------------------------------------------------------------------------------------------------------------------------------|-----------------------------------------------------------|
|      |         |           | ibandronate and risedronate in postmenopausal women at high risk for fracture who were previously treated with an oral bisphosphonate. <i>Arthritis and Rheumatism</i> 2013;10):S522-S523.                                                                                                                                                                                                                                                                                                                    |                                                           |
| 95.  | Brown   | 2009      | Brown, J. P.; Kendler, D. L.; Silverman, S. L.; Christiansen, C.; Genant, H. K.; Zanchetta, J. R.; Vukicevic, S.; Valter, I.; De Villiers, T. J.; Ciesielska, M.; Chines, A. A. Efficacy of bazedoxifene in reducing the incidence of nonvertebral fractures in postmenopausal osteoporotic women at higher fracture risk. <i>Journal of Rheumatology</i> 2009;36 (11):2566                                                                                                                                   | Conference abstract                                       |
| 96.  | Brown   | 2014      | Brown, J. P.; Roux, C.; Ho, P. R.; Bolognese, M. A.; Hall, J.; Bone, H. G.; Bonnicksen, S.; Van Den Bergh, J. P.; Ferreira, I.; Dakin, P.; Wagman, R. B.; Recknor, C. Denosumab significantly increases bone mineral density and reduces bone turnover compared with monthly oral ibandronate and risedronate in postmenopausal women who remained at higher risk for fracture despite previous suboptimal treatment with an oral bisphosphonate. <i>Osteoporosis International</i> July 2014;25(7):1953-1961 | Systematic review and/or meta-analysis and/or pooled data |
| 97.  | Brown   | 2015      | Brown, J. P.; Yue, S.; Farlay, D.; Rizzo, S.; Song, J.; Wang, A.; Wagman, R. B.; Boivin, G.. Effects of denosumab on bone matrix mineralization: Results from the phase 3 FREEDOM trial. <i>Journal of Bone and Mineral Research</i> . Conference 2015;30(Supplement 1).                                                                                                                                                                                                                                      | Conference abstract                                       |
| 98.  | Brown   | 2019      | Brown, Jacques; Chines, Arkadi; Yang, Wenjing; Chapurlat, Roland; Foldes, Joseph; Nogues, Xavier; Civitelli, Roberto; De Villiers, Tobias; Massari, Fabio; Zerbini, Cristiano A.; Recknor, Chris; Libanati, Cesar. Romosozumab improves lumbar spine bone mineral density and bone strength greater than alendronate as assessed by quantitative computed Tomography and Finite Element Analysis in the ARCH Trial. <i>Arthritis and Rheumatology</i> 2019;71(Supplement 10):3347-3349                        | Conference abstract, with no new data                     |
| 99.  | Brown   | 2019<br>a | Brown, Jacques P.; Chines, Arkadi; Yang, Wenjing; Chapurlat, Roland; Foldes, Joseph; Nogues, Xavier; Civitelli, Roberto; De Villiers, Tobias; Massari, Fabio; Zerbini, Cristiano; Recknor, Chris; Libanati, Cesar. Romosozumab improves lumbar spine bone mineral density and bone strength greater than alendronate as assessed by quantitative computed tomography and finite element analysis in the ARCH trial. <i>Journal of Bone and Mineral Research</i> 2019;34(Supplement 1):16                      | Conference abstract, with no new data                     |
| 100. | Burge   | 2013      | Burge, R.; Shen, W.; Naegeli, A. N.; Alam, J.; Silverman, S.; Gold, D. T.; Shih, T.. Use of health-related quality of life measures to predict health utility in postmenopausal osteoporotic women:                                                                                                                                                                                                                                                                                                           | Wrong outcomes                                            |

| No.  | Authors    | Year | Reference (extracted from covidence)                                                                                                                                                                                                                                                                 | Reasons for exclusion                  |
|------|------------|------|------------------------------------------------------------------------------------------------------------------------------------------------------------------------------------------------------------------------------------------------------------------------------------------------------|----------------------------------------|
|      |            |      | results from the Multiple Outcomes of Raloxifene Evaluation study. Health & Quality of Life Outcomes 2013;11:189                                                                                                                                                                                     |                                        |
| 101. | Byun       | 2017 | Byun, J. H.; Jang, S.; Lee, S.; Park, S.; Yoon, H. K.; Yoon, B. H.; Ha, Y. C.. The efficacy of bisphosphonates for prevention of osteoporotic fracture: An update meta-analysis. Journal of Bone Metabolism 2017;24(1):37-49.                                                                        | Systematic review and/or meta-analysis |
| 102. | Caffarelli | 2010 | Caffarelli, C.; Gonnelli, S.; Tanzilli, L.; Martini, G.; Nuti, R. Apparent bone mineral density at femoral neck in the monitoring the early effects of teriparatide. Bone June 2010;1():S203-S204                                                                                                    | Wrong outcomes                         |
| 103. | Calitro    | 2010 | Calitro, M.; Pietrapertosa, D.; Pietrapertosa, G.; Novelli, D.; Forcignano, T.; Giannelli, P.; Lagrasta, F. Severe postmenopausal osteoporosis: Efficacy of parathyroid hormone therapy. Osteoporosis International May 2010;1():S171                                                                | Wrong study design                     |
| 104. | Carlino    | 2011 | Carlino, G.; Cozzolongo, A. Effects of intravenous zoledronic acid following subcutaneous teriparatide [(1-34)PTH] in postmenopausal osteoporosis. Bone 07 May 2011;2():S220                                                                                                                         | Conference abstract                    |
| 105. | Carlos     | 2011 | Carlos, F.; Clark, P.; Jasqui-Romano, S.. Economic evaluation of teriparatide in the management of women with postmenopausal osteoporosis and high risk of fragility fractures in Mexico. Value in Health 2011;14 (7):A548.                                                                          | Conference abstract                    |
| 106. | Catton     | 2021 | Catton, Brett; Towheed, Tanveer; Surangiwalla, Salman. Is denosumab associated with an increased risk for infection in patients with low bone mineral density? A systematic review and meta-analysis of randomized controlled trials. International Journal of Rheumatic Diseases 2021;24(7):869-879 | Systematic review and/or meta-analysis |
| 107. | Cauley     | 2011 | Cauley, J. A.; Cummings, S.; Palermo, L.; Cosman, F.; Eastell, R.; Boonen, S.; Hue, T.; Bucci-Rechtweg, C.; Black, D. M. Fracture risk reduction with zoledronic acid by predicted fracture risk score. Bone 07 May 2011;2():S93                                                                     | Conference abstract                    |
| 108. | Cauley     | 2010 | Cauley, J.; Cummings, S.; Palermo, L.; Cosman, F.; Eastell, R.; Boonen, S.; Hue, T.; Bucci-Rechtweg, C.; Black, D. Fracture risk reduction with zoledronic acid by predicted fracture risk score. Journal of Bone and Mineral Research 2010;1():S32                                                  | Conference abstract                    |
| 109. | Cauza      | 2004 | Cauza, E.; Etemad, M.; Winkler, F.; Hanusch-Enserer, H.; Partsch, G.; Noske, H.; Dunky, A.. Pamidronate increases bone mineral density in women with postmenopausal or steroid-induced osteoporosis. Journal of Clinical Pharmacy and Therapeutics 2004;29(5):431-436.                               | Wrong patient population               |
| 110. | Cecilia    | 2009 | Cecilia, D.; Jodar, E.; Fernandez, C.; Resines, C.; Hawkins, F.. Effect of alendronate in elderly patients after low trauma hip fracture repair. Osteoporosis International 2009;20(6):903-910.                                                                                                      | Wrong patient population               |

| No.  | Authors      | Year | Reference (extracted from covidence)                                                                                                                                                                                                                                                                                                                                                                                                                                                                                                                                               | Reasons for exclusion                  |
|------|--------------|------|------------------------------------------------------------------------------------------------------------------------------------------------------------------------------------------------------------------------------------------------------------------------------------------------------------------------------------------------------------------------------------------------------------------------------------------------------------------------------------------------------------------------------------------------------------------------------------|----------------------------------------|
| 111. | Cecelja      | 2015 | Cecelja, M.; Edwards, S.; Moore, A.; Fogelman, I.; Chowienczyk, P.; Frost, M.. A pilot study to assess effects of alendronic acid on aortic calcification and stiffness in postmenopausal women. <i>Journal of Hypertension</i> 2015;1):e347.                                                                                                                                                                                                                                                                                                                                      | Wrong outcomes                         |
| 112. | Cedeno-Veloz | 2020 | Cedeno-Veloz, B. A.; Sanchez Latorre, M.; Garcia Martinez, J.; Rodriguez Garcia, A. M.; Martinez-Velilla, N.; Erviti Lopez, J.; Gutierrez-Valencia, M.; Leache Alegria, L.; Saiz, L. C.; Ramirez Velez, R.; Izquierdo, M. Efficacy of antiresorptive treatment in osteoporotic older adults: A systematic review and meta-analysis of randomised clinical trials. <i>Osteoporosis International</i> 2020;31(SUPPL 1):S255-S256                                                                                                                                                     | Conference abstract, with no new data  |
| 113. | Center       | 2020 | Center, Jacqueline R.; Bliuc, Dana; Lyles, Kenneth W. Bisphosphonates and lifespan. <i>Bone</i> 2020;141():115566                                                                                                                                                                                                                                                                                                                                                                                                                                                                  | Systematic review and/or meta-analysis |
| 114. | Chandran     | 2019 | Chandran, Thulasi; Venkatachalam, Indumathi. Efficacy and safety of denosumab compared to bisphosphonates in improving bone strength in postmenopausal osteoporosis: a systematic review. <i>Singapore medical journal</i> 2019;60(7):364-378                                                                                                                                                                                                                                                                                                                                      | Systematic review and/or meta-analysis |
| 115. | Chang        | 2020 | Chang, Yin-Fan; Wu, Chih-Hsing; Hung, Wei-Chieh; Chang, Ing-Lin; Tsai, Tsung-Ting; McCloskey, Eugene V.; Watts, Nelson B.; McClung, Michael R.; Huang, Chun-Feng; Chen, Chung-Hwan; Wu, Kun-Ling; Tsai, Keh-Sung; Chan, Ding-Cheng; Chen, Jung-Fu; Tu, Shih-Te; Hwang, Jawl-Shan; Xia, Weibo; Matsumoto, Toshio; Chung, Yoon-Sok; Cooper, Cyrus; Kanis, John A.; Yang, Rong-Sen; Chan, Wing P. Pharmacologic intervention for prevention of fractures in osteopenic and osteoporotic postmenopausal women: Systemic review and meta-analysis. <i>Bone Reports</i> 2020;13():100729 | Systematic review and/or meta-analysis |
| 116. | Chao         | 2013 | Chao, M.; Hua, Q.; Yingfeng, Z.; Guang, W.; Shufeng, S.; Yuzhen, D.; Wei, W.; Haifeng, T.. Study on the role of zoledronic acid in treatment of postmenopausal osteoporosis women. <i>Pakistan Journal of Medical Sciences</i> 2013;29(6):1381-4.                                                                                                                                                                                                                                                                                                                                  | Wrong patient population               |
| 117. | Chaplin      | 2020 | Chaplin, Steve. Romosozumab for the treatment of severe osteoporosis. <i>Prescriber</i> 2020;31(6):27-29                                                                                                                                                                                                                                                                                                                                                                                                                                                                           | Systematic review and/or meta-analysis |
| 118. | Chavassieux  | 2017 | Chavassieux, P.; Chapurlat, R.; Portero-Muzy, N.; Garcia, P.; Brown, J. P.; Horlait, S.; Libanati, C.; Boyce, R.; Wang, A.; Grauer, A.. Effects of romosozumab in postmenopausal women with osteoporosis after 2 and 12 months: Bone histomorphometry substudy. <i>Journal of Bone and Mineral Research</i> December 2017;32 (Supplement 1):S25                                                                                                                                                                                                                                    | Wrong outcomes                         |
| 119. | Chavassieux  | 2019 | Chavassieux, P.; Chapurlat, R.; Portero-Muzy, N.; Roux, J. P.; Garcia, P.; Brown, J. P.; Libanati, C.; Boyce, R. W.; Wang, A.; Grauer, A.. Bone-Forming and Antiresorptive Effects of Romosozumab in                                                                                                                                                                                                                                                                                                                                                                               | Wrong outcomes                         |



| No.  | Authors       | Year      | Reference (extracted from covidence)                                                                                                                                                                                                                                                                                                                                                                                                            | Reasons for exclusion                                         |
|------|---------------|-----------|-------------------------------------------------------------------------------------------------------------------------------------------------------------------------------------------------------------------------------------------------------------------------------------------------------------------------------------------------------------------------------------------------------------------------------------------------|---------------------------------------------------------------|
|      |               |           | Postmenopausal Women With Osteoporosis: Bone Histomorphometry and Microcomputed Tomography Analysis After 2 and 12 Months of Treatment. <i>Journal of Bone and Mineral Research</i> 01 Sep 2019;34(9):1597-1608                                                                                                                                                                                                                                 |                                                               |
| 120. | Chavassieux   | 2019<br>b | Chavassieux, Pascale; Portero-Muzy, Nathalie; Roux, Jean Paul; Horlait, Stephane; Dempster, David W.; Wang, Andrea; Wagman, Rachel B.; Chapurlat, Roland. Reduction of Cortical Bone Turnover and Erosion Depth After 2 and 3 Years of Denosumab: Iliac Bone Histomorphometry in the FREEDOM Trial. <i>Journal of bone and mineral research : the official journal of the American Society for Bone and Mineral Research</i> 2019;34(4):626-631 | Wrong outcomes                                                |
| 121. | Chawla        | 2020      | Chawla, L. Comparative study of weekly alendronate vs. yearly zoledronic acid injection in treatment of postmenopausal osteoporosis in terms of efficacy, compliance and bone markers estimation. <i>Osteoporosis International</i> 2020;31(SUPPL 1):S196-S197                                                                                                                                                                                  | Wrong comparator                                              |
| 122. | Chen          | 2019      | Chen, J.; Peng, X.; Hu, F.. Effect of co-administration of alendronate and allan sodium phosphate for the management of osteoporosis. <i>Tropical Journal of Pharmaceutical Research</i> 2019;18(1):49-54.                                                                                                                                                                                                                                      | Wrong patient population                                      |
| 123. | Chen          | 2021      | Chen, Yi; Zhu, Jun; Zhou, Yiqin; Peng, Jinhui; Wang, Bo. Efficacy and Safety of Denosumab in Osteoporosis or Low Bone Mineral Density Postmenopausal Women. <i>Frontiers in Pharmacology</i> 2021;12():588095                                                                                                                                                                                                                                   | Systematic review and/or meta-analysis                        |
| 124. | Chotiyarnwong | 2020      | Chotiyarnwong, Pojchong; McCloskey, Eugene; Eastell, Richard; Gostage, John; McClung, Michael R.; Gielen, Evelien; McDermott, Michele; Chines, Arkadi; Huang, Shuang; Cummings, Steven R. A Pooled Analysis of Fall Incidence From Placebo-Controlled Trials of Denosumab. <i>Journal of Bone and Mineral Research</i> 2020;35(6):1014-1021                                                                                                     | Systematic review and/or meta-analysis and/or pooled analysis |
| 125. | Christiansen  | 2010      | Christiansen, C.; Chesnut, C. H., 3rd; Adachi, J. D.; Brown, J. P.; Fernandes, C. E.; Kung, A. W.; Palacios, S.; Levine, A. B.; Chines, A. A.; Constantine, G. D.. Safety of bazedoxifene in a randomized, double-blind, placebo- and active-controlled Phase 3 study of postmenopausal women with osteoporosis. <i>BMC Musculoskeletal Disorders</i> 2010;11:130                                                                               | Wrong outcomes                                                |
| 126. | Churilla      | 2021      | Churilla, B. M.; Resnick, N. M.; Kotliarczyk, M. P.; Perera, S.; Greenspan, S. L. Zoledronic acid and bone health in older adults with cognitive impairment. <i>Osteoporosis International</i> 2021;():                                                                                                                                                                                                                                         | Wrong outcomes                                                |
| 127. | Cipriani      | 2021      | Cipriani, Cristiana; Colangelo, Luciano; De Martino, Viviana; Ferrone, Federica; Piazzolla, Valentina; Minisola, Salvatore; Pepe, Jessica; Piemonte, Sara; Diacinti, Daniele; Fassino, Valeria; Nieddu, Luciano.                                                                                                                                                                                                                                | Wrong outcomes                                                |

| No.  | Authors       | Year      | Reference (extracted from covidence)                                                                                                                                                                                                                                                                                                                               | Reasons for exclusion                  |
|------|---------------|-----------|--------------------------------------------------------------------------------------------------------------------------------------------------------------------------------------------------------------------------------------------------------------------------------------------------------------------------------------------------------------------|----------------------------------------|
|      |               |           | Inhibition of the RANKL with denosumab has no effect on circulating markers of atherosclerosis in women with postmenopausal osteoporosis: a pilot study. <i>Endocrine</i> 2021;71(1):199-207                                                                                                                                                                       |                                        |
| 128. | Civitelli     | 2007      | Civitelli, R.; Napoli, N.; Armamento-Villareal, R.. Use of intravenous bisphosphonates in osteoporosis. <i>Current Osteoporosis Reports</i> March 2007;5(1):8-13                                                                                                                                                                                                   | Systematic review and/or meta-analysis |
| 129. | Clifton-Bligh | 2002      | Clifton-Bligh, R.; Sambrook, P.. An update on osteoporosis. <i>Medicine Today</i> 2002;3(1):16-22                                                                                                                                                                                                                                                                  | Systematic review and/or meta-analysis |
| 130. | Colon-Emeric  | 2006      | Colon-Emeric, C. S.. Ten vs five years of bisphosphonate treatment for postmenopausal osteoporosis: Enough of a good thing. <i>Journal of the American Medical Association</i> 27 Dec 2006;296(24):2968-2969                                                                                                                                                       | Systematic review and/or meta-analysis |
| 131. | Compston      | 2000      | Compston, J. E.. Pharmacological interventions for post-menopausal osteoporosis: An evidence-based approach. <i>Rheumatology</i> 2000;39(12):1309-1312                                                                                                                                                                                                             | Systematic review and/or meta-analysis |
| 132. | Compston      | 2017      | Compston, J.; Cooper, A.; Cooper, C.; Gittoes, N.; Gregson, C.; Harvey, N.; Hope, S.; Kanis, J. A.; McCloskey, E. V.; Poole, K. E. S.; Reid, D. M.; Selby, P.; Thompson, F.; Thurston, A.; Vine, N.; National Osteoporosis Guideline, Group. UK clinical guideline for the prevention and treatment of osteoporosis. <i>Archives of Osteoporosis</i> 2017;12(1):43 | Systematic review and/or meta-analysis |
| 133. | Cooper        | 2019      | Cooper, Cyrus. Why are bisphosphonates not being used more to prevent fractures (The 'Treatment Gap'). <i>JBMR Plus</i> 2019;3(Supplement 3):21-22                                                                                                                                                                                                                 | Conference abstract, with no new data  |
| 134. | Cosman        | 1998      | Cosman, F.. The effect of raloxifene on bone. <i>Obstetrical and Gynecological Survey</i> 1998;53(10 SUPPL.):S74-S76                                                                                                                                                                                                                                               | Commentary                             |
| 135. | Cosman        | 1998<br>a | Cosman, F.; Lindsay, R.. Is parathyroid hormone a therapeutic option for osteoporosis? A review of the clinical evidence. <i>Calcified Tissue International</i> 1998;62(6):475-480                                                                                                                                                                                 | Systematic review and/or meta-analysis |
| 136. | Cosman        | 2003      | Cosman, F.. Selective estrogen-receptor modulators. <i>Clinics in Geriatric Medicine</i> May 2003;19(2):371-379                                                                                                                                                                                                                                                    | Systematic review and/or meta-analysis |
| 137. | Cosman        | 2004      | Cosman, F.; Lindsay, R.. Therapeutic potential of parathyroid hormone. <i>Current Osteoporosis Reports</i> Mar 2004;2(1):5-11                                                                                                                                                                                                                                      | Systematic review and/or meta-analysis |
| 138. | Cosman        | 2013      | Cosman, F.; Keaveny, T. M.; Kopperdahl, D.; Wermers, R. A.; Wan, X.; Krohn, K. D.; Krege, J. H.. Hip and spine strength effects of adding versus switching to teriparatide in postmenopausal women with osteoporosis treated with prior alendronate or raloxifene. <i>Journal of Bone and Mineral Research</i> 2013;28(6):1328-1336.                               | Wrong outcomes                         |
| 139. | Cosman        | 2016      | Cosman, F.; Hattersley, G.; Miller, P. D.; Hu, M. Y.; Russo, L. A. T.; Riis, B.; Williams, G.; Fitzpatrick, L.. Abaloparatide-sc significantly reduces vertebral and nonvertebral fractures and increases bone                                                                                                                                                     | Conference abstract                    |

| No.  | Authors | Year      | Reference (extracted from covidence)                                                                                                                                                                                                                                                                                                                                                                                              | Reasons for exclusion |
|------|---------|-----------|-----------------------------------------------------------------------------------------------------------------------------------------------------------------------------------------------------------------------------------------------------------------------------------------------------------------------------------------------------------------------------------------------------------------------------------|-----------------------|
|      |         |           | mineral density (BMD) regardless of age, BMD T-score, or prior fracture at baseline. Arthritis and Rheumatology 2016;68 (Supplement 10):431-432.                                                                                                                                                                                                                                                                                  |                       |
| 140. | Cosman  | 2016<br>a | Cosman, F.; Crittenden, D. B.; Adachi, J. D.; Binkley, N.; Czerwinski, E.; Ferrari, S.; Hofbauer, L. C.; Lau, E.; Lewiecki, E. M.; Miyauchi, A.; Zerbini, C. A. F.; Milmont, C. E.; Chen, L.; Maddox, J.; Meisner, P. D.; Libanati, C.; Grauer, A.. Fracture risk reduction with romosozumab: Results of a phase 3 study in postmenopausal women with osteoporosis. Arthritis and Rheumatology 2016;68 (Supplement 10):1347-1348. | Conference abstract   |
| 141. | Cosman  | 2017      | Cosman, F.; Crittenden, D. B.; Adachi, J. D.; Binkley, N.; Czerwinski, E.; Ferrari, S.; Hofbauer, L. C.; Lau, E.; Lewiecki, E. M.; Miyauchi, A.; Zerbini, C. A. F.; Milmont, C. E.; Chen, L.; Maddox, J.; Meisner, P. D.; Libanati, C.; Grauer, A.. Fracture risk reduction with romosozumab: Results of a phase 3 study in postmeno-pausal women with osteoporosis. Osteoporosis International 2017;28 (1 Supplement 1):S50-S51. | Conference abstract   |
| 142. | Cosman  | 2017<br>a | Cosman, F.; Crittenden, D. B.; Adachi, J. D.; Binkley, N.; Czerwinski, E.; Ferrari, S.; Hofbauer, L. C.; Lau, E.; Lewiecki, E. M.; Miyauchi, A.; et al.. Fracture risk reduction with romosozumab: results of the phase 3 frame study (fracture study in postmenopausal women with osteoporosis). Journal of Bone and Mineral Research 2017;31. [DOI: 10.1002/jbmr.3107]                                                          | Conference abstract   |
| 143. | Cosman  | 2018      | Cosman, F.; Lewiecki, E. M.; Ebeling, P. R.; Hesse, E.; Napoli, N.; Crittenden, D. B.; Rojeski, M.; Yang, W.; Libanati, C.; Ferrari, S.. T-score as an indicator of fracture risk on therapy: Evidence from romosozumab vs alendronate treatment in the active-controlled fracture study in postmenopausal women with osteoporosis at high risk trial. Arthritis and Rheumatology 2018;70 (Supplement 9):3156-3157.               | Conference abstract   |
| 144. | Cosman  | 2018<br>a | Cosman, F.; Crittenden, D. B.; Ferrari, S.; Khan, A.; Lane, N. E.; Lippuner, K.; Matsumoto, T.; Milmont, C. E.; Libanati, C.; Grauer, A.. Frame study: the foundation effect of rebuilding bone with one year of romosozumab leads to continued lower fracture risk after transition to denosumab. Osteoporosis International 2018;29 (1 Supplement 1):S268                                                                       | Conference abstract   |
| 145. | Cosman  | 2018<br>b | Cosman, F.; Crittenden, D. B.; Ferrari, S.; Khan, A.; Lane, N. E.; Lippuner, K.; Matsumoto, T.; Milmont, C. E.; Libanati, C.; Grauer, A.. Frame study: The foundation effect of rebuilding bone with one year of romosozumab leads to continued lower fracture risk after transition to denosumab. Annals of the Rheumatic Diseases 2018;77 (Supplement 2):217-218.                                                               | Conference abstract   |

| No.  | Authors | Year      | Reference (extracted from covidence)                                                                                                                                                                                                                                                                                                                                                                                                 | Reasons for exclusion                  |
|------|---------|-----------|--------------------------------------------------------------------------------------------------------------------------------------------------------------------------------------------------------------------------------------------------------------------------------------------------------------------------------------------------------------------------------------------------------------------------------------|----------------------------------------|
| 146. | Cosman  | 2018<br>d | Cosman, F.; Lewiecki, E. M.; Ebeling, P. R.; Hesse, E.; Napoli, N.; Crittenden, D. B.; Rojeski, M.; Yang, W.; Libanati, C.; Ferrari, S. T-score as an indicator of fracture risk on therapy: Evidence from romosozumab vs alendronate treatment in the active-controlled fracture study in postmenopausal women with osteoporosis at high risk trial. <i>Arthritis and Rheumatology</i> September 2018;70 (Supplement 9)():3156-3157 | Conference abstract                    |
| 147. | Cosman  | 2019      | Cosman, F.; McMahon, D.; Dempster, D.; Nieves, J. W.. Standard vs Cyclic Teriparatide and Denosumab Treatment for Osteoporosis: A Randomized Trial. <i>Journal of bone and mineral research: the official journal of the American Society for Bone and Mineral Research</i> . 2019;16.                                                                                                                                               | Wrong comparator                       |
| 148. | Cosman  | 2019<br>a | Cosman, F.; Lewiecki, E. M.; Ebeling, P. R.; Hesse, E.; Napoli, N.; Crittenden, D. B.; Rojeski, M.; Yang, W.; Libanati, C.; Ferrari, S. L. T-score as an indicator of fracture risk on therapy: Evidence from romosozumab vs. alendronate treatment in the activecontrolled fracture study in postmenopausal women with osteoporosis at high risk trial. <i>Osteoporosis International</i> 2019;30(SUPPL 2):S168                     | Conference abstract, with no new data  |
| 149. | Cosman  | 2019<br>b | Cosman, F.; Lewiecki, E. M.; Ebeling, P. R.; Hesse, E.; Napoli, N.; Matsumoto, T.; Rojeski, M.; Yang, W.; Libanati, C.; Ferrari, S. L. Levels of improvements in bone mineral density in postmenopausal women with osteoporosis treated with romosozumab: A post hoc analysis of the arch phase 3 trial. <i>Osteoporosis International</i> 2019;30(SUPPL 2):S732-S733                                                                | Conference abstract, with no new data  |
| 150. | Cosman  | 2020      | Cosman, F.; Lewiecki, E. Michael; Ebeling, Peter R.; Hesse, E.; Napoli, N.; Crittenden, Daria B.; Rojeski, M.; Yang, W.; Libanati, C.; Ferrari, S. T-score as an indicator of fracture risk on therapy: evidence from romosozumab vs alendronate treatment in the ARCH trial. <i>Osteologie</i> 2020;29(1):72-73                                                                                                                     | Conference abstract, with no new data  |
| 151. | Cosman  | 2020<br>a | Cosman, Felicia. Anabolic Therapy and Optimal Treatment Sequences for Patients With Osteoporosis at High Risk for Fracture. <i>Endocrine practice : official journal of the American College of Endocrinology and the American Association of Clinical Endocrinologists</i> 2020;26(7):777-786                                                                                                                                       | Systematic review and/or meta-analysis |
| 152. | Cosman  | 2020<br>b | Cosman, Felicia; McMahon, Donald; Dempster, David; Nieves, Jeri W. Standard Versus Cyclic Teriparatide and Denosumab Treatment for Osteoporosis: A Randomized Trial. <i>Journal of bone and mineral research : the official journal of the American Society for Bone and Mineral Research</i> 2020;35(2):219-225                                                                                                                     | Wrong comparator                       |
| 153. | Cosman  | 2021      | Cosman, Felicia; Libanati, Cesar; Deignan, Cynthia; Yu, Zhigang; Wang, Zhenxun; Ferrari, Serge; Beck Jensen, Jens-Erik; Peris, Pilar; Bertoldo, Francesco;                                                                                                                                                                                                                                                                           | Wrong outcomes                         |

| No.  | Authors       | Year      | Reference (extracted from covidence)                                                                                                                                                                                                                                                                                                                                                       | Reasons for exclusion                         |
|------|---------------|-----------|--------------------------------------------------------------------------------------------------------------------------------------------------------------------------------------------------------------------------------------------------------------------------------------------------------------------------------------------------------------------------------------------|-----------------------------------------------|
|      |               |           | Lespessailles, Eric; Hesse, Eric; Cummings, Steven R. Romosozumab Followed by Antiresorptive Treatment Increases the Probability of Achieving Bone Mineral Density Treatment Goals. <i>JBMR Plus</i> 2021;5(11):e10546                                                                                                                                                                     |                                               |
| 154. | Cranney       | 1999      | Cranney, A.; Welch, V.; Tugwell, P.; Wells, G.; Adachi, J. D.; McGowan, J.; Shea, B.. Responsiveness of endpoints in osteoporosis clinical trials - An update. <i>Journal of Rheumatology</i> 1999;26(1):222-228                                                                                                                                                                           | Systematic review and/or meta-analysis        |
| 155. | Cranney       | 2002      | Cranney, A.; Guyatt, G.; Griffith, L.; Wells, G.; Tugwell, P.; Rosen, C.. IX: Summary of meta-analyses of therapies for postmenopausal osteoporosis. <i>Endocrine Reviews</i> August 2002;23(4):570-578                                                                                                                                                                                    | Systematic review and/or meta-analysis        |
| 156. | Cranney       | 2002<br>a | Cranney, A.; Tugwell, P.; Adachi, J.; Weaver, B.; Zytaruk, N.; Papaioannou, A.; Robinson, V.; Shea, B.; Wells, G.; Guyatt, G.. III. Meta-analysis of risedronate for the treatment of postmenopausal osteoporosis. <i>Endocrine Reviews</i> August 2002;23(4):517-523                                                                                                                      | Systematic review and/or meta-analysis        |
| 157. | Cummings      | 2010      | Cummings, S. R.; Ensrud, K.; Delmas, P. D.; LaCroix, A. Z.; Vukicevic, S.; Reid, D. M.; Goldstein, S.; Sriram, U.; Lee, A.; Thompson, J.; Armstrong, R. A.; Thompson, D. D.; Powles, T.; Zanchetta, J.; Kendler, D.; Neven, P.; Eastell, R.; Pearl Study Investigators. Lasofoxifene in postmenopausal women with osteoporosis. <i>New England Journal of Medicine</i> 2010;362(8):686-96. | Wrong intervention                            |
| 158. | Cummings      | 2019      | Cummings, S. R.; Lui, L. Y.; Eastell, R.; Allen, I. E.. Association between Drug Treatments for Patients with Osteoporosis and Overall Mortality Rates: A Meta-analysis. <i>JAMA Internal Medicine</i> . 2019;:                                                                                                                                                                            | Systematic review and/or meta-analysis        |
| 159. | Dane          | 2008      | Dane, C.; Dane, B.; Cetin, A.; Erginbas, M.. Effect of risedronate on biochemical marker of bone resorption in postmenopausal women with osteoporosis or osteopenia. <i>Gynecological Endocrinology</i> 2008;24(4):207-13                                                                                                                                                                  | Wrong outcomes                                |
| 160. | David         | 2021      | David, Natalie L.; Bruce, Michael; Leder, Benjamin Z.; Tsai, Joy N.; Ramchand, Sabashini K.; Lee, Hang; Bouxsein, Mary L. Effects of Combination Denosumab and High-Dose Teriparatide Administration on Bone Microarchitecture and Estimated Strength: The DATA-HD HR-pQCT Study. <i>Journal of Bone and Mineral Research</i> 2021;36(1):41-51                                             | Wrong outcomes                                |
| 161. | Dawson Hughes | 2007      | Dawson-Hughes, B.; Chen, P.; Krege, J. H.. Response to teriparatide in patients with baseline 25-hydroxyvitamin D insufficiency or sufficiency. <i>Journal of Clinical Endocrinology and Metabolism</i> 2007;92(12):4630-4636.                                                                                                                                                             | Wrong patient population (sub group analysis) |
| 162. | Davis         | 2020      | Davis, Sarah; Simpson, Emma; Hamilton, Jean; James, Marrassa Martyn-St; Rawdin, Andrew;                                                                                                                                                                                                                                                                                                    | Systematic review and/or meta-analysis        |

| No.  | Authors   | Year      | Reference (extracted from covidence)                                                                                                                                                                                                                                                                                                                                                                                                            | Reasons for exclusion                 |
|------|-----------|-----------|-------------------------------------------------------------------------------------------------------------------------------------------------------------------------------------------------------------------------------------------------------------------------------------------------------------------------------------------------------------------------------------------------------------------------------------------------|---------------------------------------|
|      |           |           | Wong, Ruth; Goka, Edward; Gittoes, Neil; Selby, Peter. Denosumab, raloxifene, romosozumab and teriparatide to prevent osteoporotic fragility fractures: a systematic review and economic evaluation. Health technology assessment (Winchester, England) 2020;24(29):1-314                                                                                                                                                                       |                                       |
| 163. | Deardorff | 2021      | Deardorff, W. J.; Stijacic Cenzer, I.; Lee, S. Time to benefit of bisphosphonates for the prevention of fractures in postmenopausal women with osteoporosis: A meta-analysis. Journal of the American Geriatrics Society 2021;69(SUPPL 1):S145                                                                                                                                                                                                  | Conference abstract, with no new data |
| 164. | Delmas    | 2002      | Delmas, P. D.; Ensrud, K. E.; Adachi, J. D.; Harper, K. D.; Sarkar, S.; Gennari, C.; Reginster, J. Y.; Pols, H. A. P.; Recker, R. R.; Harris, S. T.; Wu, W.; Genant, H. K.; Black, D. M.; Eastell, R.. Efficacy of raloxifene on vertebral fracture risk reduction in postmenopausal women with osteoporosis: Four-year results from a randomized clinical trial. Journal of Clinical Endocrinology and Metabolism 2002;87(8):3609-3617.        | Extension study                       |
| 165. | Delmas    | 2006      | Delmas, P. D.; Adami, S.; Strugala, C.; Stakkestad, J. A.; Reginster, J. Y.; Felsenberg, D.; Christiansen, C.; Civitelli, R.; Drezner, M. K.; Recker, R. R.; Bolognese, M.; Hughes, C.; Masanauskaite, D.; Ward, P.; Sambrook, P.; Reid, D. M.. Intravenous ibandronate injections in postmenopausal women with osteoporosis: One-year results from the dosing intravenous administration study. Arthritis and Rheumatism 2006;54(6):1838-1846. | Wrong outcomes                        |
| 166. | Delmas    | 2007      | Delmas, P. D.. Use of alendronate after 5 years of treatment [3]. Journal of the American Medical Association 09 May 2007;297(18):1979-1980                                                                                                                                                                                                                                                                                                     | Commentary                            |
| 167. | Delmas    | 2008      | Delmas, P. D.; Benhamou, C. L.; Man, Z.; Tlustochowicz, W.; Matzkin, E.; Eusebio, R.; Zanchetta, J.; Olszynski, W. P.; Recker, R. R.; McClung, M. R.. Monthly dosing of 75 mg risedronate on 2 consecutive days a month: Efficacy and safety results. Osteoporosis International 2008;19(7):1039-1045.                                                                                                                                          | Wrong intervention                    |
| 168. | Delmas    | 2008<br>a | Delmas, P. D.; McClung, M. R.; Zanchetta, J. R.; Racewicz, A.; Roux, C.; Benhamou, C. L.; Man, Z.; Eusebio, R. A.; Beary, J. F.; Burgio, D. E.; Matzkin, E.; Boonen, S.. Efficacy and safety of risedronate 150 mg once a month in the treatment of postmenopausal osteoporosis. Bone 2008;42(1):36-42                                                                                                                                          | Wrong comparator                      |
| 169. | Dempster  | 2016      | Dempster, D. W.; Roschger, P.; Misof, B. M.; Zhou, H.; Paschalis, E. P.; Alam, J.; Ruff, V. A.; Klaushofer, K.; Taylor, K. A.. Differential Effects of Teriparatide and Zoledronic Acid on Bone Mineralization Density Distribution at 6 and 24 Months in the SHOTZ Study. Journal of Bone and Mineral Research. 2016.                                                                                                                          | Extension study                       |

| No.  | Authors     | Year      | Reference (extracted from covidence)                                                                                                                                                                                                                                                                                                                                                                                | Reasons for exclusion                  |
|------|-------------|-----------|---------------------------------------------------------------------------------------------------------------------------------------------------------------------------------------------------------------------------------------------------------------------------------------------------------------------------------------------------------------------------------------------------------------------|----------------------------------------|
| 170. | Dempster    | 2016<br>a | Dempster, D. W.; Zhou, H.; Recker, R. R.; Brown, J. P.; Recknor, C. P.; Lewiecki, E. M.; Miller, P. D.; Rao, S. D.; Kendler, D. L.; Lindsay, R.; Krege, J. H.; Alam, J.; Taylor, K. A.; Janos, B.; Ruff, V. A.. Differential effects of teriparatide and denosumab on intact PTH and bone formation indices: AVA osteoporosis study. <i>Journal of Clinical Endocrinology and Metabolism</i> 2016;101(4):1353-1363. | Wrong outcomes                         |
| 171. | DeSantis    | 2002      | DeSantis, A.; Buchman, A.. Current and emerging therapies in osteoporosis. <i>Expert Opinion on Pharmacotherapy</i> 2002;3(7):835-843                                                                                                                                                                                                                                                                               | Systematic review and/or meta-analysis |
| 172. | Dhesi       | 2006      | Dhesi, J. K.; Allain, T. J.; Mangoni, A. A.; Jackson, S. H. D.. The implications of a growing evidence base for drug use in elderly patients. Part 4. Vitamin D and bisphosphonates for fractures and osteoporosis. <i>British Journal of Clinical Pharmacology</i> May 2006;61(5):521-528                                                                                                                          | Systematic review and/or meta-analysis |
| 173. | Dhillon     | 2016      | Dhesi, J. K.; Allain, T. J.; Mangoni, A. A.; Jackson, S. H. D. The implications of a growing evidence base for drug use in elderly patients. Part 4. Vitamin D and bisphosphonates for fractures and osteoporosis. <i>British Journal of Clinical Pharmacology</i> May 2006;61(5):521-528                                                                                                                           | Systematic review and/or meta-analysis |
| 174. | Diez-Perez  | 2019      | Diez-Perez, A.; Marin, F.; Eriksen, E. F.; Kendler, D. L.; Krege, J. H.; Delgado-Rodriguez, M.. Effects of teriparatide on hip and upper limb fractures in patients with osteoporosis: A systematic review and meta-analysis. <i>Bone</i> 2019;120:1-8.                                                                                                                                                             | Systematic review and/or meta-analysis |
| 175. | Diez-Perez  | 2019<br>a | Diez-Perez, A.; Marin, F.; Eriksen, E. F.; Kendler, D. L.; Krege, J. H.; Delgado-Rodriguez, M.; Hassanzai, M.. Effects of teriparatide on hip and upper limb fractures in patients with osteoporosis: A systematic review and meta-analysis. <i>Osteoporosis International</i> May 2019;30 (Supplement 1):S51-S52                                                                                                   | Conference abstract                    |
| 176. | Diez-Perez  | 2019<br>b | Diez-Perez, A. New results of teriparatide in the treatment of severe osteoporosis. <i>Osteoporosis International</i> 2019;30(SUPPL 2):S781-S782                                                                                                                                                                                                                                                                    | Conference abstract, with no new data  |
| 177. | Diez-Perez  | 2019<br>c | Diez-Perez, A.; Marin, F.; Eriksen, E. F.; Kendler, D. L.; Krege, J. H.; Delgado-Rodriguez, M.; Hassanzai, M. Effects of teriparatide on hip and upper limb fractures in patients with osteoporosis: A systematic review and meta-analysis. <i>Osteoporosis International</i> 2019;30(Supplement 1):S51-S52                                                                                                         | Conference abstract, with no new data  |
| 178. | Diez-Perez  | 2019<br>d | Diez-Perez, Adolfo; Marin, Fernando; Eriksen, Erik F.; Kendler, David L.; Krege, John H.; Delgado-Rodriguez, Miguel. Effects of teriparatide on hip and upper limb fractures in patients with osteoporosis: A systematic review and meta-analysis. <i>Bone</i> 2019;120():1-8                                                                                                                                       | Systematic review and/or meta-analysis |
| 179. | Diker-Cohen | 2020      | Diker-Cohen, Talia; Rosenberg, Dana; Avni, Tomer; Shepshelovich, Daniel; Tsvetov, Gloria; Gafter-Gvili, Anat. Risk for Infections During Treatment With Denosumab for Osteoporosis: A Systematic Review                                                                                                                                                                                                             | Systematic review and/or meta-analysis |

| No.  | Authors   | Year | Reference (extracted from covidence)                                                                                                                                                                                                                                                                                                                                                                                                          | Reasons for exclusion                  |
|------|-----------|------|-----------------------------------------------------------------------------------------------------------------------------------------------------------------------------------------------------------------------------------------------------------------------------------------------------------------------------------------------------------------------------------------------------------------------------------------------|----------------------------------------|
|      |           |      | and Meta-analysis. The Journal of clinical endocrinology and metabolism 2020;105(5):                                                                                                                                                                                                                                                                                                                                                          |                                        |
| 180. | Dimai     | 2017 | Dimai, H. P.; Ljuhar, R.; Ljuhar, D.; Norman, B.; Haftner, T.; Nehrer, S.; Fahrleitner-Pammer, A.. Fractal-based assessment of bone-antiresorptive treatment effects at the lumbar spine using conventional radiographs; Results from a pilot study in a sub-cohort of postmenopausal women who participated in the FREEDOM pivotal trial and its extension Phase*. Journal of Bone and Mineral Research December 2017;32 (Supplement 1):S356 | Wrong study design                     |
| 181. | Dimai     | 2019 | Dimai, H. P.; Ljuhar, R.; Ljuhar, D.; Norman, B.; Nehrer, S.; Kurth, A.; Fahrleitner-Pammer, A.. Assessing the effects of long-term osteoporosis treatment by using conventional spine radiographs: results from a pilot study in a sub-cohort of a large randomized controlled trial. Skeletal Radiology 2019;48(7):1023-1032                                                                                                                | Wrong outcomes                         |
| 182. | Doggrell  | 2002 | Doggrell, S. A.. Zoledronate once-yearly increases bone mineral density - Implications for osteoporosis. Expert Opinion on Pharmacotherapy 2002;3(7):1007-1009                                                                                                                                                                                                                                                                                | Commentary                             |
| 183. | Domotor   | 2020 | Domotor, Zsuzsa Reka; Vorhendi, Nora; Hanak, Lilla; Hegyi, Peter; Csiki, Endre; Szako, Lajos; Parniczky, Andrea; Eross, Balint; Kiss, Szabolcs. Oral Treatment With Bisphosphonates of Osteoporosis Does Not Increase the Risk of Severe Gastrointestinal Side Effects: A Meta-Analysis of Randomized Controlled Trials. Frontiers in endocrinology 2020;11():573976                                                                          | Systematic review and/or meta-analysis |
| 184. | Dong      | 2021 | Dong, Su-Li; Jiao, Yongqiang; Yang, Hai-Liang. Effectiveness of bisphosphonates on bone mineral density in osteopenic postmenopausal women: A systematic review and network meta-analysis of randomized controlled trials. Medicine 2021;100(31):e26715                                                                                                                                                                                       | Systematic review and/or meta-analysis |
| 185. | Dreyfuss  | 1997 | Dreyfuss, B. J.; Rai, D. S.. Bisphosphonates in the treatment of osteoporosis. Western Journal of Medicine 1997;167(3):177-178                                                                                                                                                                                                                                                                                                                | Commentary                             |
| 186. | Duckworth | 2018 | Duckworth, A.; Tuck, C.; Murray, G.; Rodriguez, A.; Ralston, S.; Tobias, J.; Wilkinson, M.; McQueen, M.; Biant, L.; Roberts, C.. Effect of early bisphosphonate treatment on fracture healing: The fracture and bisphosphonate (FAB) study. Journal of Musculoskeletal Neuronal Interactions March 2018;18 (1):114-115                                                                                                                        | Conference abstract                    |
| 187. | Duckworth | 2019 | Duckworth, A. D.; McQueen, M. M.; Tuck, C. E.; Tobias, J. H.; Wilkinson, J. M.; Biant, L. C.; Pulford, E. C.; Aldridge, S.; Edwards, C.; Roberts, C. P.; Ramachandran, M.; McAndrew, A. R.; Cheng, K. C. K.; Johnston, P.; Shah, N. H.; Mathew, P.; Harvie, J.; Hanusch, B. C.; Harkess, R.; Rodriguez, A.; Murray, G. D.; Ralston, S. H.. Effect of Alendronic Acid on                                                                       | Wrong patient population               |



| No.  | Authors  | Year      | Reference (extracted from covidence)                                                                                                                                                                                                                                                                                                                                                                                                                                                                                       | Reasons for exclusion                  |
|------|----------|-----------|----------------------------------------------------------------------------------------------------------------------------------------------------------------------------------------------------------------------------------------------------------------------------------------------------------------------------------------------------------------------------------------------------------------------------------------------------------------------------------------------------------------------------|----------------------------------------|
|      |          |           | Fracture Healing: A Multicenter Randomized Placebo-Controlled Trial. <i>Journal of Bone and Mineral Research</i> June 2019;34(6):1025-1032                                                                                                                                                                                                                                                                                                                                                                                 |                                        |
| 188. | Dufresne | 2003      | Dufresne, T. E.; Chmielewski, P. A.; Manhart, M. D.; Johnson, T. D.; Borah, B.. Risedronate preserves bone architecture in early postmenopausal women in 1 year as measured by three-dimensional microcomputed tomography. <i>Calcified Tissue International</i> 2003;73(5):423-32                                                                                                                                                                                                                                         | Wrong outcomes                         |
| 189. | Eastell  | 2003      | Eastell, R.; Barton, I.; Hannon, R. A.; Chines, A.; Garnero, P.; Delmas, P. D.. Relationship of early changes in bone resorption to the reduction in fracture risk with risedronate. <i>Journal of Bone &amp; Mineral Research</i> 2003;18(6):1051-6                                                                                                                                                                                                                                                                       | Wrong study design                     |
| 190. | Eastell  | 2010      | Eastell, R.; Lang, T.; Boonen, S.; Cummings, S.; Delmas, P. D.; Cauley, J. A.; Horowitz, Z.; Kerzberg, E.; Bianchi, G.; Kendler, D.; Leung, P.; Man, Z.; Mesenbrink, P.; Eriksen, E. F.; Black, D. M.. Effect of once-yearly zoledronic acid on the spine and hip as measured by quantitative computed tomography: Results of the HORIZON pivotal fracture trial. <i>Osteoporosis International</i> 2010;21(7):1277-1285.                                                                                                  | Wrong outcomes                         |
| 191. | Eastell  | 2010<br>a | Eastell, R.; Vrijens, B.; Cahall, D.; Roux, C.; Ringe, J.; Garnero, P.; Watts, N.. Relationships between osteoporosis medication adherence, surrogate marker outcomes and non-vertebral fracture incidence. <i>Bone</i> 2010;1):S200-S201.                                                                                                                                                                                                                                                                                 | Wrong study design                     |
| 192. | Eastell  | 2011      | Eastell, R.; Vrijens, B.; Cahall, D. L.; Ringe, J. D.; Garnero, P.; Watts, N. B.. Bone turnover markers and bone mineral density response with risedronate therapy: Relationship with fracture risk and patient adherence. <i>Journal of Bone and Mineral Research</i> 2011;26(7):1662-1669.                                                                                                                                                                                                                               | Wrong intervention                     |
| 193. | Eastell  | 2019      | Eastell, R.; Mitlak, B. H.; Wang, Y.; Hu, M.; Fitzpatrick, L. A.; Black, D. M. Bone turnover markers to explain changes in lumbar spine BMD with abaloparatide and teriparatide: results from ACTIVE. <i>Osteoporosis international : a journal established as result of cooperation between the European Foundation for Osteoporosis and the National Osteoporosis Foundation of the USA</i> 2019;30(3):667-673                                                                                                           | Wrong outcomes                         |
| 194. | Eastell  | 2021      | Eastell, Richard; Black, Dennis M.; Lui, Li-Yung; Chines, Arkadi; Marin, Fernando; Khosla, Sundeep; de Papp, Anne E.; Cauley, Jane A.; Mitlak, Bruce; McCulloch, Charles E.; Vittinghoff, Eric; Bauer, Douglas C.; Foundation for the National Institutes of Health Bone Quality, Project. Treatment-Related Changes in Bone Turnover and Fracture Risk Reduction in Clinical Trials of Antiresorptive Drugs: Proportion of Treatment Effect Explained. <i>Journal of bone and mineral research : the official journal</i> | Systematic review and/or meta-analysis |

| No.  | Authors | Year      | Reference (extracted from covidence)                                                                                                                                                                                                                                                                                                                                                                 | Reasons for exclusion                  |
|------|---------|-----------|------------------------------------------------------------------------------------------------------------------------------------------------------------------------------------------------------------------------------------------------------------------------------------------------------------------------------------------------------------------------------------------------------|----------------------------------------|
|      |         |           | of the American Society for Bone and Mineral Research 2021;36(2):236-243                                                                                                                                                                                                                                                                                                                             |                                        |
| 195. | Eastell | 2017      | Eastell, R.; Black, D.; Bouxsein, M.; Lui, L. Y.; Cauley, J.; Khosla, S.; McCulloch, C.; Bauer, D.. Treatment-related changes in bone turnover and fracture risk reduction in clinical trials of anti-resorptive drugs: The FNHI bone quality study. Journal of Bone and Mineral Research December 2017;32 (Supplement 1):S173                                                                       | Conference abstract                    |
| 196. | Eastell | 2017<br>a | Eastell, R.; Mitlak, B. H.; Wang, Y.; Hu, M. Y.; Fitzpatrick, L. A.; Black, D. M.. Early change in PINP correlates with lumbar spine BMD more strongly with abaloparatide than with teriparatide: Results of the ACTIVE trial. Journal of Bone and Mineral Research December 2017;32 (Supplement 1):S378                                                                                             | Conference abstract                    |
| 197. | Eastell | 2009      | Eastell, R.; Black, D. M.; Boonen, S.; McLellan, A. R.; Cummings, S. R.; Delmas, P. D.; Palermo, L.; Mesenbrink, P.; Cauley, J. A. Once-Yearly zoledronic acid 5 mg infusion for treatment of postmenopausal osteoporosis: Effects on fracture incidence in patient subgroups from the HORIZON-PFT study. Rheumatology April 2009;1():i105                                                           | Conference abstract                    |
| 198. | Eisman  | 2008      | Eisman, J. A.; Civitelli, R.; Adami, S.; Czerwinski, E.; Recknor, C.; Prince, R.; Reginster, J. Y.; Zaidi, M.; Felsenberg, D.; Hughes, C.; Mairon, N.; Masanouskaite, D.; Reid, D. M.; Delmas, P. D.; Recker, R. R.. Efficacy and tolerability of intravenous ibandronate injections in postmenopausal osteoporosis: 2-Year results from the DIVA study. Journal of Rheumatology 2008;35(3):488-497. | Wrong intervention                     |
| 199. | Ellis   | 2008      | Ellis, G. K.; Bone, H. G.; Chlebowski, R.; Paul, D.; Spadafora, S.; Smith, J.; Fan, M.; Jun, S.. Randomized trial of denosumab in patients receiving adjuvant aromatase inhibitors for nonmetastatic breast cancer. Journal of Clinical Oncology 2008;26(30):4875-4882.                                                                                                                              | Wrong patient population               |
| 200. | Ellis   | 2014      | Ellis, A. G.; Reginster, J. Y.; Luo, X.; Cappelleri, J. C.; Chines, A.; Sutradhar, S.; Jansen, J. P.. Bazedoxifene versus oral bisphosphonates for the prevention of nonvertebral fractures in postmenopausal women with osteoporosis at higher risk of fracture: A network meta-analysis. Value in Health 2014;17(4):424-432.                                                                       | Systematic review and/or meta-analysis |
| 201. | Ensrud  | 1997      | Ensrud, K. E.; Black, D. M.; Palermo, L.; Bauer, D. C.; Barrett-Connor, E.; Quandt, S. A.; Thompson, D. E.; Karpf, D. B.. Treatment with alendronate prevents fractures in women at highest risk: Results from the fracture intervention trial. Archives of Internal Medicine 1997;157(22):2617-2624.                                                                                                | Conference abstract                    |
| 202. | Ensrud  | 1998      | Ensrud, K. E.; Black, D. M.; Palermo, L.. Alendronate reduced new fractures in postmenopausal women who had low bone-mineral density and existing                                                                                                                                                                                                                                                    | Commentary                             |

| No.  | Authors | Year      | Reference (extracted from covidence)                                                                                                                                                                                                                                                                                                                                                                              | Reasons for exclusion                  |
|------|---------|-----------|-------------------------------------------------------------------------------------------------------------------------------------------------------------------------------------------------------------------------------------------------------------------------------------------------------------------------------------------------------------------------------------------------------------------|----------------------------------------|
|      |         |           | vertebral fractures. Evidence-Based Medicine July/August 1998;3(4):119                                                                                                                                                                                                                                                                                                                                            |                                        |
| 203. | Ensrud  | 2019      | Ensrud, K. E.; Crandall, C. J.. In older postmenopausal women with osteopenia, zoledronate reduced fragility fractures at 6 years. <i>Annals of Internal Medicine</i> 2019;170(8):JC42                                                                                                                                                                                                                            | Commentary                             |
| 204. | Eriksen | 2009      | Eriksen, E. F.; Lyles, K. W.; Colon-Emeric, C. S.; Pieper, C. F.; Magaziner, J. S.; Adachi, J. D.; Hyldstrup, L.; Recknor, C.; Nordsletten, L.; Lavecchia, C.; Hu, H.; Boonen, S.; Mesenbrink, P.. Antifracture efficacy and reduction of mortality in relation to timing of the first dose of zoledronic acid after hip fracture. <i>Journal of Bone and Mineral Research</i> 2009;24(7):1308-1313.              | Wrong patient population               |
| 205. | Eriksen | 2014      | Eriksen, E. F.; Diez-Perez, A.; Boonen, S.. Update on long-term treatment with bisphosphonates for postmenopausal osteoporosis: a systematic review. <i>Bone</i> 2014;58:126-35                                                                                                                                                                                                                                   | Systematic review and/or meta-analysis |
| 206. | Eriksen | 2019      | Eriksen, Erik; Chapurlat, Roland; Chavassieux, Pascale; Boyce, Rogely; Shi, Yifei; Wagman, Rachel; Brown, Jacques; Horlait, Stephane; Libanati, Cesar. Extensive modeling-based bone formation after 2 months of romosozumab treatment: Results from the frame clinical trial. <i>Arthritis and Rheumatology</i> 2019;71(Supplement 10):3342-3344                                                                 | Conference abstract, with no new data  |
| 207. | Eriksen | 2019<br>a | Eriksen, Erik F.; Chapurlat, Roland; Chavassieux, Pascale; Horlait, Stephane; Shi, Yifei; Wagman, Rachel B.; Brown, Jacques P.; Boyce, Rogely; Libanati, Cesar. Extensive modeling-based bone formation after 2 months of romosozumab treatment: Results from the FRAME clinical trial. <i>Journal of Bone and Mineral Research</i> 2019;34(Supplement 1):16                                                      | Conference abstract, with no new data  |
| 208. | Eriksen | 2020      | Eriksen, Erik F.; Chapurlat, Roland; Chavassieux, Pascale; Boyce, Rogely; Shi, Yifei; Wagman, Rachel B.; Brown, Jacques P.; Horlait, Stephane; Libanati, Cesar. Extensive modeling-based bone formation after 2 months of romosozumab treatment: Results from the FRAME clinical trial. <i>Bone Reports</i> 2020;13(Supplement):100440                                                                            | Conference abstract, with no new data  |
| 209. | Eriksen | 2021      | Eriksen, Erik F.; Chapurlat, Roland; Chavassieux, Pascale; Boyce, Rogely Waite; Shi, Yifei; Betah, Donald; Brown, Jacques P.; Horlait, Stephane; Libanati, Cesar. Modeling-Based Bone Formation After 2 Months of Romosozumab Treatment: Results From the FRAME Clinical Trial. <i>Journal of bone and mineral research : the official journal of the American Society for Bone and Mineral Research</i> 2021;(): | Wrong outcomes                         |
| 210. | Eriksen | 2021      | Eriksen, Erik F.; Chapurlat, Roland; Chavassieux, Pascale; Boyce, Rogely Waite; Shi, Yifei; Betah, Donald; Brown, Jacques P.; Horlait, Stephane; Libanati, Cesar. Based Bone Formation After 2                                                                                                                                                                                                                    | Wrong outcomes                         |

| No.  | Authors    | Year      | Reference (extracted from covidence)                                                                                                                                                                                                                                                                                                                                             | Reasons for exclusion                  |
|------|------------|-----------|----------------------------------------------------------------------------------------------------------------------------------------------------------------------------------------------------------------------------------------------------------------------------------------------------------------------------------------------------------------------------------|----------------------------------------|
|      |            |           | Months of Romosozumab Treatment: Results From the FRAME Clinical Trial. Journal of Bone and Mineral Research 2021;():                                                                                                                                                                                                                                                            |                                        |
| 211. | Ettinger   | 2000      | Ettinger, B.; Black, D. M.; Mitlak, B. H.; Rosenfeld, J. A.. Can the prophylactic use of raloxifene, a selective estrogen-receptor modulator, prevent bone mineral loss and fractures in women with diagnosed osteoporosis or vertebral fractures? Western Journal of Medicine 2000;173(3):186-188                                                                               | Commentary                             |
| 212. | Fan        | 2020      | Fan, Guiyong; Chen, Hao; Tan, Wei; Guo, Weixiao; Liu, Chaoqun; Liu, Jinlian; Zhao, Qun; Lu, Pei. Comparison between teriparatide and bisphosphonates for improving bone mineral density in postmenopausal osteoporosis patients: A meta-analysis. Medicine 2020;99(15):e18964                                                                                                    | Systematic review and/or meta-analysis |
| 213. | Fan        | 2020<br>a | Fan, Qin; Wang, Junjie. The Efficacy and Safety of Bisphosphonates for Osteoporosis in Women Older Than 65 Years: A Meta-Analysis. Current pharmaceutical design 2020;26(32):4022-4030                                                                                                                                                                                           | Full-text not available                |
| 214. | Favus      | 2006      | Favus, M. J.. Does denosumab improve low BMD in postmenopausal women? Nature Clinical Practice Endocrinology and Metabolism November 2006;2(11):600-601                                                                                                                                                                                                                          | Commentary                             |
| 215. | Feldman    | 2020      | Feldman, Robert; Geusens, Piet; Oates, Mary; Yang, Wenjing; Rojeski, Maria; Thomas, Thierry; Makras, Polyzois; Jakob, Franz; Langdahl, Bente; Libanati, Cesar. Romosozumab Treatment Lowers the Incidence of New Vertebral Fractures Across All Fracture Severity Grades among Postmenopausal Women with Osteoporosis. Journal of Bone and Mineral Research 2020;35(SUPPL 1):253 | Conference abstract, with no new data  |
| 216. | Felsenberg | 1998      | Felsenberg, D.; Alenfeld, F.; Bock, O.; Hammermeister, C.; Gowan, W.. Placebo-controlled multicenter study of oral alendronate in postmenopausal osteoporotic women. FOSIT-Study-Group. Fosamax International Trial. Maturitas 1998;31(1):35-44.                                                                                                                                 | Wrong outcomes                         |
| 217. | Felsenberg | 2010      | Felsenberg, D.; Charpulat, R.; Cheung, A. M.; LaRoche, M.; Morris, E.; Seeman, E.; Thomas, T. P.; Zanchetta, J. R.; Borah, B.; D'Alo, G.; Darbie, L.; Rizzolli, R.. Longitudinal in vivo micro-CT assessment in osteopenic women demonstrated that risedronate reduced the deterioration of cortical bone. Bone June 2010;1):S35                                                 | Wrong outcomes                         |
| 218. | Ferrari    | 2017      | Ferrari, S.; Butler, P.; Kendler, D. L.; Miller, P. D.; Roux, C.; Wang, A. T.; Wagman, R. B.; Lewiecki, E. M.. Ten-year continued nonvertebral fracture reduction in postmenopausal osteoporosis with denosumab treatment. Journal of Bone and Mineral Research December 2017;32 (Supplement 1):S25                                                                              | Conference abstract                    |
| 219. | Ferrari    | 2019      | Ferrari, S.; Butler, P. W.; Kendler, D. L.; Miller, P. D.; Roux, C.; Wang, A. T.; Huang, S.; Wagman, R. B.;                                                                                                                                                                                                                                                                      | Extension study                        |

| No.  | Authors     | Year      | Reference (extracted from covidence)                                                                                                                                                                                                                                                                                                                                                                                                                      | Reasons for exclusion                 |
|------|-------------|-----------|-----------------------------------------------------------------------------------------------------------------------------------------------------------------------------------------------------------------------------------------------------------------------------------------------------------------------------------------------------------------------------------------------------------------------------------------------------------|---------------------------------------|
|      |             |           | Lewiecki, E. M.. Further Nonvertebral Fracture Reduction beyond 3 Years for Up to 10 Years of Denosumab Treatment. Journal of Clinical Endocrinology and Metabolism 19 Jun 2019;104(8):3450-3461                                                                                                                                                                                                                                                          |                                       |
| 220. | Ferrari     | 2019<br>a | Ferrari, S. F.; Michael, E. M.; Butler, P. B.; Kendler, D. K.; Napoli, N. N.; Huang, S. H.; Crittenden, B. C.; Pannacciulli, N. P.; Siris, E. S.; Binkley, N. B.. Skeletal benefit/risk of long-term denosumab therapy: A virtual twin analysis of fractures prevented to skeletal safety events observed. Osteoporosis International May 2019;30 (Supplement 1):S64-S65                                                                                  | Conference abstract                   |
| 221. | Ferrari     | 2019<br>b | Ferrari, S. F.; Michael, E. M.; Butler, P. B.; Huang, S. H.; Crittenden, B. C.; Pannacciulli, N. P.; Kendler, D. K.; Napoli, N. N.; Siris, E. S.; Binkley, N. B. Skeletal benefit/risk of long-term denosumab therapy: A virtual twin analysis of fractures prevented to skeletal safety events observed. Osteoporosis International 2019;30(Supplement 1):S64-S65                                                                                        | Conference abstract, with no new data |
| 222. | Ferrari     | 2019c     | Ferrari, S.; Libanati, C.; Lin, Celia Jow Fang; Brown, J. P.; Cosman, F.; Czerwinski, E.; de Gregorio, L. H.; Malouf-Sierra, J.; Reginster, J. Y.; Wang, A.; Wagman, R. B.; Lewiecki, E. M. Relationship Between Bone Mineral Density T-Score and Nonvertebral Fracture Risk Over 10 Years of Denosumab Treatment. Journal of bone and mineral research : the official journal of the American Society for Bone and Mineral Research 2019;34(6):1033-1040 | Extension study                       |
| 223. | Ferrari     | 2020      | Ferrari, Serge; Lewiecki, E. Michael; Butler, Peter W.; Kendler, David L.; Napoli, Nicola; Huang, Shuang; Crittenden, Daria B.; Pannacciulli, Nicola; Siris, Ethel; Binkley, Neil. Favorable skeletal benefit/risk of long-term denosumab therapy: A virtual-twin analysis of fractures prevented relative to skeletal safety events observed. Bone 2020;134():115287                                                                                     | Extension study                       |
| 224. | Ferreira    | 2019      | Ferreira, T.; Glastonbury, C. A.; Bovijn, J.; Censin, J. C.; Laber, S.; Krebs, K.; Milani, L.; Magi, R.; Chen, C.; Neale, B. M.; Lin, K.; Chen, Z.; Boxall, R.; Millwood, I. Y.; Walters, R. G.; Pulit, S. L.; Li, L.; Lindgren, C. M.; Holmes, M. V. Lifelong genetically lowered sclerostin and risk of cardiovascular disease. European Journal of Human Genetics 2019;27(Supplement 2):1120-1121                                                      | Conference abstract, with no new data |
| 225. | Finkelstein | 2010      | Finkelstein, J. S.; Wyland, J. J.; Lee, H.; Neer, R. M.. Effects of teriparatide, alendronate, or both in women with postmenopausal osteoporosis. Journal of Clinical Endocrinology and Metabolism 2010;95(4):1838-1845.                                                                                                                                                                                                                                  | Wrong outcomes                        |
| 226. | Fitzpatrick | 2017      | Fitzpatrick, L. A.; Hattersley, G.; Miller, P. D.; Hu, M.; Russo, L. A.; Riis, B. J.; Williams, G. C.; Cosman, F.. Abaloparatide-SC significantly reduces vertebral                                                                                                                                                                                                                                                                                       | Conference abstract                   |

| No.  | Authors     | Year      | Reference (extracted from covidence)                                                                                                                                                                                                                                                                                                                                                                  | Reasons for exclusion                  |
|------|-------------|-----------|-------------------------------------------------------------------------------------------------------------------------------------------------------------------------------------------------------------------------------------------------------------------------------------------------------------------------------------------------------------------------------------------------------|----------------------------------------|
|      |             |           | and nonvertebral fractures and increases bone mineral density regardless of baseline risk: Results from the active phase 3 clinical trial. <i>Osteoporosis International</i> 2017;28 (1 Supplement 1):S50.                                                                                                                                                                                            |                                        |
| 227. | Fitzpatrick | 2016      | Fitzpatrick, L. A.; Miller, P.; Cosman, F.; Black, D.; Lau, E.; Zerbin, C. A. F.; Riis, B. J.; Christiansen, C.; Williams, G.; Hu, M. Y.; Hattersley, G. Effects of abaloparatide on vertebral, nonvertebral, major osteoporotic and clinical fracture incidence in postmenopausal women with osteoporosis: Results of the phase 3 active trial. <i>Osteoporosis International</i> April 2016;1():S39 | Conference abstract                    |
| 228. | Fixen       | 2021      | Fixen, Cy; Tunoa, Jennifer. Romosozumab: a Review of Efficacy, Safety, and Cardiovascular Risk. <i>Current osteoporosis reports</i> 2021;19(1):15-22                                                                                                                                                                                                                                                  | Systematic review and/or meta-analysis |
| 229. | Fogelman    | 2008      | Fogelman, I.; Fordham, J. N.; Fraser, W. D.; Spector, T. D.; Christiansen, C.; Morris, S. A.; Fox, J.. Parathyroid hormone(1-84) treatment of postmenopausal women with low bone mass receiving hormone replacement therapy. <i>Calcified Tissue International</i> 2008;83(2):85-92.                                                                                                                  | Wrong intervention                     |
| 230. | Fontalis    | 2018      | Fontalis, A.; Kenanidis, E.; Prousalis, E.; Potoupnis, M.; Tsiridis, E.. Safety and efficacy of denosumab in osteoporotic patients previously treated with other medications: a systematic review and meta-analysis. <i>Expert Opinion on Drug Safety</i> 2018;17(4):413-428.                                                                                                                         | Systematic review and/or meta-analysis |
| 231. | Frampton    | 2009      | Frampton, J. E.. Risedronate on two consecutive days per month. <i>Drugs and Aging</i> 2009;26(4):355-362.                                                                                                                                                                                                                                                                                            | Wrong study design                     |
| 232. | Fuggle      | 2020      | Fuggle, N. R.; Cooper, C.; Harvey, N. C.; Al-Daghri, N.; Brandi, M. L.; Bruyere, O.; Cano, A.; Dennison, E. M.; Diez-Perez, A.; Kaufman, J. M.; Palacios, S.; Prieto-Alhambra, D.; Rozenberg, S.; Thomas, T.; Tremollieres, F.; Rizzoli, R.; Kanis, J. A.; Reginster, J. Y. Assessment of Cardiovascular Safety of Anti-Osteoporosis Drugs. <i>Drugs</i> 2020;80(15):1537-1552                        | Systematic review and/or meta-analysis |
| 233. | Fraser      | 2011      | Fraser, L. A.; Vogt, K. N.; Adachi, J. D.; Thabane, L. Fracture risk associated with continuation versus discontinuation of bisphosphonates after 5 years of therapy in patients with primary osteoporosis: a systematic review and meta-analysis. <i>Therapeutics &amp; Clinical Risk Management</i> 2011;7():157-66                                                                                 | Systematic review and/or meta-analysis |
| 234. | Fujita      | 2014<br>a | Fujita, T.; Fukunaga, M.; Itabashi, A.; Tsutani, K.; Nakamura, T.. Once-Weekly Injection of Low-Dose Teriparatide (28.2 µg) Reduced the Risk of Vertebral Fracture in Patients with Primary Osteoporosis. <i>Calcified Tissue International</i> 2014;94(2):170-175. [DOI: 10.1007/s00223-013-9777-8]                                                                                                  | Wrong patient population               |
| 235. | Galesanu    | 2012      | Galesanu, C.; Florescu, A.; Iulia Loghin, A.; Grozavu, I.; Ancute, P.; Zaharia, V.; Mocanu, V.. Effects of combined treatment with alendronate and                                                                                                                                                                                                                                                    | Conference abstract                    |

| No.  | Authors     | Year | Reference (extracted from covidence)                                                                                                                                                                                                                                                                                                                                                | Reasons for exclusion                 |
|------|-------------|------|-------------------------------------------------------------------------------------------------------------------------------------------------------------------------------------------------------------------------------------------------------------------------------------------------------------------------------------------------------------------------------------|---------------------------------------|
|      |             |      | alfacalcidol comparing with other bisphosphonates and alfacalcidol in BMD changes at postmenopausal osteoporotic women. Journal of Bone and Mineral Research. Conference 2012;27(SUPPL. 1).                                                                                                                                                                                         |                                       |
| 236. | Galesanu    | 2013 | Galesanu, C.; Ancute, P.; Zaharia, V.; Mocanu, V.; Galesanu, M. R.. Combined treatment with alendronate and alfacalcidol comparing with other bisphosphonates and alfacalcidol in BMD changes. Osteoporosis International 2013;1):S129-S130.                                                                                                                                        | Conference abstract                   |
| 237. | Galesanu    | 2017 | Galesanu, C.; Gheorghe, L.; Lisnic, N.; Zaharia, V.. Denosumab vs. zoledronic acid in treatment of osteoporosis in postmeno-pausal women. Osteoporosis International 2017;28 (Supplement 1):S295.                                                                                                                                                                                   | Conference abstract                   |
| 238. | Galesanu    | 2011 | Galesanu, C.; Lisnic, N.; Mocanu, V.; Florescu, A.; Loghin, A. I.; Galesanu, M. R. Efficacy of bisphosphonates in the treatment of postmenopausal osteoporosis. Osteoporosis International October 2011;5():S739                                                                                                                                                                    | Conference abstract                   |
| 239. | Galesanu    | 2020 | Galesanu, C.; Gheorghe, L.; Lisnic, N.; Aancute, P. Bisphosphonates or biological therapy in postmenopausal women with osteoporosis? What is the best? Osteoporosis International 2020;31(SUPPL 1):S394                                                                                                                                                                             | Conference abstract, with no new data |
| 240. | Gallagher   | 2013 | Gallagher, J. C.; Palacios, S.; Ryan, K. A.; Messig, M.; Pan, K.; Kendler, D.; Komm, B. S.; Mirkin, S.. A pooled analysis of the effects of bazedoxifene/conjugated estrogens on bone loss from the selective estrogens, menopause, and response to therapy trials. Endocrine Reviews. Conference: 95th Annual Meeting and Expo of the Endocrine Society, ENDO 2013;34(3 SUPPL. 1): | Conference abstract                   |
| 241. | Gambacciani | 2001 | Gambacciani, M.; Ciaponi, M.; Cappagli, B.; Genazzani, A. R.. Effects of low-dose continuous combined conjugated estrogens and medroxyprogesterone acetate on menopausal symptoms, body weight, bone density, and metabolism in postmenopausal women. American Journal of Obstetrics & Gynecology 2001;185(5):1180-5                                                                | Wrong intervention                    |
| 242. | Genant      | 2010 | Genant, H. K.; Bucci-Rechtweg, C.; Bauer, D. C.; Mesenbrink, P. G.; Palermo, L.; Nusgarten, L.; Eastell, R.; Black, D. M. Does zoledronic acid increase risk of atypical femoral shaft fractures? results from the HORIZON-PFT. Osteoporosis International May 2010;1():S161-S162                                                                                                   | Wrong study design                    |
| 243. | Genant      | 2011 | Genant, H.; Radcliffe, H.; Libanati, C.; Engelke, K.; Zanchetta, J.; Hoiseth, A.; Yuen, C.; Stonkus, S.; Bolognese, M.; Franek, E.; Fuerst, T. BMD and BMC improvements in hip total, trabecular, and cortical bone following denosumab treatment: QCT results                                                                                                                      | Conference abstract                   |

| No.  | Authors  | Year      | Reference (extracted from covidence)                                                                                                                                                                                                                                                                                                                                                                                                                              | Reasons for exclusion                  |
|------|----------|-----------|-------------------------------------------------------------------------------------------------------------------------------------------------------------------------------------------------------------------------------------------------------------------------------------------------------------------------------------------------------------------------------------------------------------------------------------------------------------------|----------------------------------------|
|      |          |           | from the freedom trial. Osteoporosis International March 2011;1():S116-S117                                                                                                                                                                                                                                                                                                                                                                                       |                                        |
| 244. | Genant   | 2005      | Genant, H. K.; Siris, E.; Crans, G. G.; Desai, D.; Krege, J. H.. Reduction in vertebral fracture risk in teriparatide-treated postmenopausal women as assessed by spinal deformity index. Bone 2005;37(2):170-174.                                                                                                                                                                                                                                                | Wrong outcomes                         |
| 245. | Genant   | 2005<br>a | Genant, H. K.; Halse, J.; Briney, W. G.; Xie, L.; Glass, E. V.; Krege, J. H.. The effects of teriparatide on the incidence of back pain in postmenopausal women with osteoporosis. Current Medical Research and Opinion 2005;21(7):1027-1034.                                                                                                                                                                                                                     | Wrong outcomes                         |
| 246. | Genant   | 2010      | Genant, H. K.; Bucci-Rechtweg, C.; Bauer, D. C.; Mesenbrink, P. G.; Palermo, L.; Nusgarten, L.; Eastell, R.; Black, D. M.. Does zoledronic acid increase risk of atypical femoral shaft fractures? results from the HORIZON-PFT. Osteoporosis International May 2010;1):S161-S162                                                                                                                                                                                 | Conference abstract                    |
| 247. | Genant   | 2013      | Genant, H. K.; Keaveny, T. M.; Zapalowski, C.; Engelke, K.; Fuerst, T.; Kendler, D. L.; Recknor, C.; Boonen, S.; Wang, A.; Dakin, P.; et al.,. Cortical bone parameters at the hip in response to denosumab vs placebo and the clinical relevance of these changes in postmenopausal women with osteoporosis <75 and >75 years old. Journal of Bone and Mineral Research 2013;28.                                                                                 | Wrong outcomes                         |
| 248. | Genant   | 2014      | Genant, H. K.; Keaveny, T. M.; Zapalowski, C.; Engelke, K.; Fuerst, T.; Kendler, D. L.; Recknor, C.; Boonen, S.; Wang, A.; Dakin, P.; Libanati, C.; McClung, M. R.. Clinical relevance of changes in hip cortical bone parameters in response to denosumab (DMAB) vs. Placebo (PBO) in postmenopausal women with osteoporosis <75 and >=75 years old. Osteoporosis International April 2014;2):S175                                                               | Conference abstract                    |
| 249. | Generali | 2003      | Generali, J.; Cada, D. J.. Zoledronic acid: Postmenopausal osteoporosis. Hospital Pharmacy 01 Sep 2003;38(9):828-832                                                                                                                                                                                                                                                                                                                                              | Commentary                             |
| 250. | Gennari  | 1998      | Gennari, C.; Reginster, J. Y.. Bisphosphonates and osteoporosis treatment in Italy. Aging-Clinical & Experimental Research 1998;10(4):284-94                                                                                                                                                                                                                                                                                                                      | Systematic review and/or meta-analysis |
| 251. | Geusens  | 2017      | Geusens, P.; Marin, F.; L. Kendler D; Russo, L.; Zerbini, C. A. F.; Greenspan, S.; Minisola, S.; Bagur, A.; Lakatos, P.; Casado, E.; Fahrleitner-Pammer, A.; Stepan, J.; Lespessailles, E.; Moericke, R.; Body, J. J.; Lopez-Romero, P.. Teriparatide compared with risedronate and the risk of fractures in subgroups of postmenopausal women with severe osteoporosis: The VERO Trial. Journal of Bone and Mineral Research December 2017;32 (Supplement 1):S22 | Conference abstract                    |
| 252. | Geusens  | 2017<br>b | Geusens, P.; Oates, M.; Miyauchi, A.; Adachi, J. D.; Lazaretti-Castro, M.; Ebeling, P. R.; Perez Nino, C.                                                                                                                                                                                                                                                                                                                                                         | Conference abstract                    |



| No.  | Authors   | Year | Reference (extracted from covidence)                                                                                                                                                                                                                                                                                                                                                                                                                                                                                                                                                                                                                                        | Reasons for exclusion                  |
|------|-----------|------|-----------------------------------------------------------------------------------------------------------------------------------------------------------------------------------------------------------------------------------------------------------------------------------------------------------------------------------------------------------------------------------------------------------------------------------------------------------------------------------------------------------------------------------------------------------------------------------------------------------------------------------------------------------------------------|----------------------------------------|
|      |           |      | A.; Milmont, C. J.; Grauer, A.; Libanati, C. Romosozumab rapidly reduces clinical vertebral fracture incidence: Results from the frame study. <i>Osteoporosis International</i> July 2017;28 (1 Supplement 1):S51-S52                                                                                                                                                                                                                                                                                                                                                                                                                                                       |                                        |
| 253. | Geusens   | 2019 | Geusens, P.; Kendler, D.; Fahrleitner-Pammer, A.; Lopez-Romero, P.; Marin, F.. The distribution of prevalent and incident vertebral fractures in the teriparatide versus risedronate "vero" clinical trial. <i>Annals of the Rheumatic Diseases</i> June 2019;78 (Supplement 2):929-930                                                                                                                                                                                                                                                                                                                                                                                     | Conference abstract, with no new data  |
| 254. | Ghadimi   | 2020 | Ghadimi, Nashmil; Aryankhesal, Aidin; Kaveh, Sara; Hosseini, Hossein; Vojdani, Mahdi. Efficacy and safety of Romosozumab in treatment for low bone mineral density: a systematic review and meta-analysis. <i>Clinical rheumatology</i> 2020;39(11):3261-3276                                                                                                                                                                                                                                                                                                                                                                                                               | Systematic review and/or meta-analysis |
| 255. | Glasser   | 2002 | Glasser, S. P.. SERMs revisited. <i>Cardiology Review</i> 2002;19(9):42                                                                                                                                                                                                                                                                                                                                                                                                                                                                                                                                                                                                     | Systematic review and/or meta-analysis |
| 256. | Gnant     | 2016 | Gnant, M.; Pfeiler, G.; Dubsy, P. C.; Hubalek, M.; Greil, R.; Jakesz, R.; Wette, V.; Balic, M.; Haslbauer, F.; Melbinger-Zeinitzer, E.; Bjelic-Radacic, V.; Artner-Matuschek, S.; Fitzal, F.; Marth, C.; Sevela, P.; Mlineritsch, B.; Steger, G. G.; Manfreda, D.; Exner, R.; Egle, D.; Bergh, J.; Kainberger, F.; Talbot, S.; Warner, D.; Fesl, C.; Singer, C. F.. The impact of adjuvant denosumab on disease-free survival: Results from 3,425 postmenopausal patients of the ABCSG-18 trial. <i>Cancer Research. Conference: 38th Annual CTRC AACR San Antonio Breast Cancer Symposium. San Antonio, TX United States. Conference Publication: 2016;76(4 SUPPL. 1):</i> | Conference abstract                    |
| 257. | Goel      | 2021 | Goel, Heenam; Libber, Jessie; Borchardt, Gretta; Krueger, Diane; Binkley, Neil. A pilot study comparing daily teriparatide with monthly cycles of teriparatide and raloxifene. <i>Archives of osteoporosis</i> 2021;16(1):70                                                                                                                                                                                                                                                                                                                                                                                                                                                | Wrong outcomes                         |
| 258. | Goldstein | 2000 | Goldstein, S. R.; Siddhanti, S.; Ciaccia, A. V.; Plouffe Jr, L.. A pharmacological review of selective oestrogen receptor modulators. <i>Human Reproduction Update</i> May/June 2000;6(3):212-224                                                                                                                                                                                                                                                                                                                                                                                                                                                                           | Systematic review and/or meta-analysis |
| 259. | Gonnelli  | 1999 | Gonnelli, S.; Cepollaro, C.; Pondrelli, C.; Martini, S.; Montagnani, A.; Monaco, R.; Gennari, C.. Bone turnover and the response to alendronate treatment in postmenopausal osteoporosis. <i>Calcified Tissue International</i> 1999;65(5):359-364.                                                                                                                                                                                                                                                                                                                                                                                                                         | Wrong outcomes                         |
| 260. | Gonnelli  | 2006 | Gonnelli, S.; Martini, G.; Caffarelli, C.; Salvadori, S.; Cadirni, A.; Montagnani, A.; Nuti, R.. Teriparatide's effects on quantitative ultrasound parameters and bone density in women with established osteoporosis. <i>Osteoporosis International</i> 2006;17(10):1524-1531.                                                                                                                                                                                                                                                                                                                                                                                             | Wrong outcomes                         |

| No.  | Authors   | Year | Reference (extracted from covidence)                                                                                                                                                                                                                                                                                                                                                       | Reasons for exclusion                  |
|------|-----------|------|--------------------------------------------------------------------------------------------------------------------------------------------------------------------------------------------------------------------------------------------------------------------------------------------------------------------------------------------------------------------------------------------|----------------------------------------|
| 261. | Gossiel   | 2017 | Gossiel, F.; Flintham, L.; Naylor, K.; Walsh, J.; Peel, N.; McCloskey, E.; Eastell, R. Offset of effect of oral bisphosphonates on tartrate-resistant acid phosphatase in postmenopausal osteoporosis: the TRIO Study. <i>Journal of Bone and Mineral Research</i> December 2017;32 (Supplement 1):S379                                                                                    | Conference abstract                    |
| 262. | Gossiel   | 2019 | Gossiel, F.; Jacques, R. M.; Naylor, K. E.; McCloskey, E. V.; Walsh, J. S.; Eastell, R.; Peel, N. The effect of bisphosphonates on bone turnover and bone balance in postmenopausal women with osteoporosis: The T-score bone marker approach in the TRIO study. <i>JBMR Plus</i> 2019;3(Supplement 3):54                                                                                  | Wrong comparator                       |
| 263. | Gossiel   | 2020 | Gossiel, F.; Paggiosi, M. A.; Naylor, K. E.; McCloskey, E. V.; Walsh, J.; Eastell, R.; Peel, N. The effect of bisphosphonates on bone turnover and bone balance in postmenopausal women with osteoporosis: The T-score bone marker approach in the TRIO study. <i>Bone</i> 2020;131():115158                                                                                               | Wrong comparator                       |
| 264. | Greenspan | 2002 | Greenspan, S.; Field-Munves, E.; Tonino, R.; Smith, M.; Petruschke, R.; Wang, L.; Yates, J.; De Papp, A. E.; Palmisano, J. Tolerability of once-weekly alendronate in patients with osteoporosis: A randomized, double-blind, placebo-controlled study. <i>Mayo Clinic Proceedings</i> 01 Oct 2002;77(10):1044-1052<br>2002 01 Oct                                                         | Wrong patient population               |
| 265. | Greenspan | 2007 | Greenspan, S. L.; Bone, H. G.; Ettinger, M. P.; Hanley, D. A.; Lindsay, R.; Zanchetta, J. R.; Blosch, C. M.; Mathisen, A. L.; Morris, S. A.; Marriott, T. B.. Effect of recombinant human parathyroid hormone (1-84) on vertebral fracture and bone mineral density in postmenopausal women with osteoporosis. A randomized trial. <i>Annals of Internal Medicine</i> 2007;146(5):326-339. | Wrong intervention                     |
| 266. | Greenspan | 2012 | Greenspan, S. L.; Nace, D.; Perera, S.; Ferchak, M.; Fiorito, G.; Medich, D.; Zukowski, K.; Adams, D.; Lee, C.; Saul, M.; Resnick, N. M.. Lessons learned from an osteoporosis clinical trial in frail long-term care residents. <i>Clinical Trials</i> April 2012;9(2):247-256                                                                                                            | Systematic review and/or meta-analysis |
| 267. | Greenspan | 2018 | Greenspan, S. L.; Fitzpatrick, L. A.; Mitlak, B.; Wang, Y.; Harvey, N. C.; Deal, C.; Cosman, F.; McClung, M. Abaloparatide effect on bone mineral density and fracture incidence in postmenopausal women with osteoporosis aged 80 years or older. <i>Arthritis and Rheumatology</i> September 2018;70 (Supplement 9):3159-3160                                                            | Wrong study design                     |
| 268. | Grey      | 2012 | Grey, A.; Bolland, M.; Horne, A.; Wattie, D.; Gamble, G.; Reid, I. R.. Five years of anti-resorptive effects after 1 or 2 doses of zoledronate-Data from 2 randomized controlled trials. <i>Bone</i> May 2012;1():S46-S47                                                                                                                                                                  | Conference abstract                    |

| No.  | Authors | Year      | Reference (extracted from covidence)                                                                                                                                                                                                                                                                                                                                                                                | Reasons for exclusion                  |
|------|---------|-----------|---------------------------------------------------------------------------------------------------------------------------------------------------------------------------------------------------------------------------------------------------------------------------------------------------------------------------------------------------------------------------------------------------------------------|----------------------------------------|
| 269. | Gu      | 2015      | Gu, H. F.; Gu, L. J.; Wu, Y.; Zhao, X. H.; Zhang, Q.; Xu, Z. R.; Yang, Y. M. Efficacy and Safety of Denosumab in Postmenopausal Women With Osteoporosis: A Meta-Analysis. <i>Medicine</i> 2015;94(44):e1674                                                                                                                                                                                                         | Systematic review and/or meta-analysis |
| 270. | Gupta   | 2007      | Gupta, G.; Aronow, W. S.. Treatment of postmenopausal osteoporosis. <i>Comprehensive Therapy</i> September 2007;33(3):114-119                                                                                                                                                                                                                                                                                       | Systematic review and/or meta-analysis |
| 271. | Hadji   | 2012      | Hadji, P.; Gamerdinger, D.; Spieler, W.; Kann, P. H.; Loeffler, H.; Articus, K.; Moricke, R.; Ziller, V.. Rapid Onset and Sustained Efficacy (ROSE) study: results of a randomised, multicentre trial comparing the effect of zoledronic acid or alendronate on bone metabolism in postmenopausal women with low bone mass. <i>Osteoporosis International</i> 2012;23(2):625-33                                     | Wrong outcomes                         |
| 272. | Hadji   | 2011<br>b | Hadji, P.; Zanchetta, J. R.; Russo, L. A.; Recknor, C. P.; Saag, K. G.; McKiernan, F. E.; Silverman, S. L.; Alam, J.; Burge, R. T.; Krege, J. H.; Lakshmanan, M. L.; Masica, D. N.; Mitlak, B. H.; Stock, J. L. Effect of teriparatide compared with risedronate on back pain and incident vertebral fractures in postmenopausal women with osteoporotic vertebral fractures. <i>Bone</i> 07 May 2011;2()():S82-S83 | Wrong outcomes                         |
| 273. | Hagino  | 2013      | Hagino, H.; Nakamura, T.; Ito, M.; Nakano, T.; Hashimoto, J.; Tobinai, M.; Mizunuma, H.. Bone mineral density increases with monthly I.V. ibandronate injections contribute to its fracture risk reduction in primary osteoporosis: 3-year analysis of the phase III mover study. <i>Osteoporosis International</i> December 2013;4():S592-S593                                                                     | Conference abstract                    |
| 274. | Hagino  | 2013<br>a | Hagino, H.; Nakamura, T.; Ito, M.; Nakano, T.; Hashimoto, J.; Tobinai, M.; Mizunuma, H.. Bone mineral density increases with monthly i.v. ibandronate injections contribute to its fracture risk reduction in primary osteoporosis: 3-year analysis of the phase III mover study. <i>Journal of Bone and Mineral Research</i> . Conference 2013;28(SUPPL. 1).                                                       | Conference abstract                    |
| 275. | Hagino  | 2017      | Hagino, H.; Nakamura, T.; Ito, M.; Tobinai, M.; Hashimoto, J.; Yoshida, S.. Association between total Hip bone mineral density at baseline and vertebral fracture incidence in the MOVER study. <i>Journal of Bone and Mineral Research</i> December 2017;32 (Supplement 1):S269                                                                                                                                    | Conference abstract                    |
| 276. | Hagino  | 2019      | Hagino, H.; Narita, R.; Yokoyama, Y.; Watanabe, M.; Tomomitsu, M.. A multicenter, randomized, rater-blinded, parallel-group, phase 3 study to compare the efficacy, safety, and immunogenicity of biosimilar RGB-10 and reference once-daily teriparatide in patients with osteoporosis. <i>Osteoporosis International</i> 01 Oct 2019;30(10):2027-2037                                                             | Wrong patient population               |

| No.  | Authors   | Year | Reference (extracted from covidence)                                                                                                                                                                                                                                                                                                                                                                                                                                                                                                                       | Reasons for exclusion                  |
|------|-----------|------|------------------------------------------------------------------------------------------------------------------------------------------------------------------------------------------------------------------------------------------------------------------------------------------------------------------------------------------------------------------------------------------------------------------------------------------------------------------------------------------------------------------------------------------------------------|----------------------------------------|
| 277. | Han       | 2012 | Han, S. L.; Wan, S. L.. Effect of teriparatide on bone mineral density and fracture in postmenopausal osteoporosis: Meta-analysis of randomised controlled trials. <i>International Journal of Clinical Practice</i> 2012;66(2):199-209.                                                                                                                                                                                                                                                                                                                   | Systematic review and/or meta-analysis |
| 278. | Han       | 2021 | Han, Hee Soo; Park, Moon Seok; Sung, Ki Hyuk; Lee, Kyoung Min; Cho, Sung Hee. Comparison of bone mineral density and markers of bone turnover in osteoporotic women after 6-month treatment with alendronate or bazedoxifene: A randomized controlled trial. <i>Journal of Bone Metabolism</i> 2021;28(2):131-137                                                                                                                                                                                                                                          | Wrong patient population               |
| 279. | Handel    | 2020 | Handel, M. N.; Cardoso, I.; VonBulow, C.; Rohde, J. F.; Ussing, A.; Nielsen, S. M.; Christensen, R.; Langdahl, B.; Thomas, T.; Body, J. J.; Brandi, M. L.; Diez-Perez, A.; Nogues, X.; Hadji, P.; Javaid, M. K.; Prieto-Alhambra, D.; Lems, W. F.; Roux, C.; Minisola, S.; Kurth, A.; Ferrari, S. L.; Abrahamsen, B. Fracture risk reduction by anti-osteoporosis pharmacotherapy according to baseline risk factors among postmenopausal women: Metaregression analyses of randomised trials. <i>Osteoporosis International</i> 2020;31(SUPPL 1):S43-S44. | Conference abstract, with no new data  |
| 280. | Harris    | 2004 | Harris, S. T.; Watts, N. B.; Li, Z.; Chines, A. A.; Hanley, D. A.; Brown, J. P.. Two-year efficacy and tolerability of risedronate once a week for the treatment of women with postmenopausal osteoporosis. <i>Current Medical Research and Opinion</i> May 2004;20(5):757-764                                                                                                                                                                                                                                                                             | Wrong comparator                       |
| 281. | Harrod    | 2020 | Harrod, Wendy; Inderjeeth, Charles. Morbidity and all-cause mortality associated with osteoporosis treatments. <i>Internal Medicine Journal</i> 2020;50(SUPPL 2):44                                                                                                                                                                                                                                                                                                                                                                                        | Conference abstract, with no new data  |
| 282. | Harvey    | 2015 | Harvey, N. C.; Kanis, J. A.; Odén, A.; Nakamura, T.; Shiraki, M.; Sugimoto, T.; Kuroda, T.; Johansson, H.; McCloskey, E. V.. Efficacy of weekly teriparatide does not vary by baseline fracture probability calculated using FRAX. <i>Osteoporosis International</i> 2015;26(9):2347-2353. [DOI: 10.1007/s00198-015-3129-7]                                                                                                                                                                                                                                | Wrong patient population               |
| 283. | He        | 2021 | He, B.; Zhang, M. Z.; Quan, Z. X.; Zhao, J. Q. Zoledronic acid and fracture risk: A meta-analysis of 12 randomized controlled trials. <i>European review for medical and pharmacological sciences</i> 2021;25(3):1564-1573                                                                                                                                                                                                                                                                                                                                 | Systematic review and/or meta-analysis |
| 284. | Heaney    | 2002 | Heaney, R. P.; Zizic, T. M.; Fogelman, I.; Olszynski, W. P.; Geusens, P.; Kasibhatla, C.; Alsayed, N.; Isaia, G.; Davie, M. W.; Chesnut, C. H., 3 <sup>rd</sup> . Risedronate reduces the risk of first vertebral fracture in osteoporotic women. <i>Osteoporosis International</i> 2002;13(6):501-5                                                                                                                                                                                                                                                       | Systematic review and/or meta-analysis |
| 285. | Hernandez | 2019 | Hernandez, A. V.; Perez-Lopez, F. R.; Piscocoya, A.; Pasupuleti, V.; Roman, Y. M.; Thota, P.; Herrera, A..                                                                                                                                                                                                                                                                                                                                                                                                                                                 | Conference abstract                    |

| No.  | Authors   | Year      | Reference (extracted from covidence)                                                                                                                                                                                                                                                                                                                         | Reasons for exclusion                  |
|------|-----------|-----------|--------------------------------------------------------------------------------------------------------------------------------------------------------------------------------------------------------------------------------------------------------------------------------------------------------------------------------------------------------------|----------------------------------------|
|      |           |           | Comparative efficacy of bone anabolic therapies in women with postmenopausal osteoporosis: A systematic review and network meta-analysis of randomized controlled trials. <i>Maturitas</i> November 2019;129:12-22                                                                                                                                           |                                        |
| 286. | Hernandez | 2019      | Hernandez, Adrian V.; Perez-Lopez, Faustino R.; Piscoya, Alejandro; Pasupuleti, Vinay; Roman, Yuani M.; Thota, Priyaleela; Herrera, Antonio. Comparative efficacy of bone anabolic therapies in women with postmenopausal osteoporosis: A systematic review and network meta-analysis of randomized controlled trials. <i>Maturitas</i> 2019;129():12-22     | Systematic review and/or meta-analysis |
| 287. | Hirsch    | 2018      | Hirsch, C.. In postmenopausal women with osteoporosis, romosozumab followed by alendronate reduced fractures vs alendronate alone. <i>Annals of Internal Medicine</i> 2018;168(2):JC3. [DOI: 10.7326/ACPJC-2018-168-2-003]                                                                                                                                   | Commentary                             |
| 288. | Hong      | 2019      | Hong, H.; Song, T.; Liu, Y.; Li, J.; Jiang, Q.; Song, Q.; Deng, Z.. The effectiveness and safety of parathyroid hormone in fracture healing: A meta-analysis. <i>Clinics (Sao Paulo, Brazil)</i> 2019;74:e800                                                                                                                                                | Systematic review and/or meta-analysis |
| 289. | Horikawa  | 2019      | Horikawa, A.; Miyakoshi, N.; Hongo, M.; Kasukawa, Y.; Kodama, H.; Shimada, Y.; Roeber, L.. A prospective comparative study of intravenous alendronate and ibandronate for the treatment of osteoporosis. <i>Medicine (United States)</i> 01 Feb 2019;98 (6) (no pagination)(e14340):                                                                         | Wrong study design                     |
| 290. | Horne     | 2020      | Horne, Anne M.; Mihov, Borislav; Stewart, Angela; Gamble, Gregory D.; Reid, Ian R.; Bastin, Sonja. Zoledronate Slows Weight Loss and Maintains Fat Mass in Osteopenic Older Women: Secondary Analysis of a Randomized Controlled Trial. <i>Calcified tissue international</i> 2020;106(4):386-391                                                            | Wrong outcomes                         |
| 291. | Horne     | 2021      | Horne, Anne M.; Mihov, Borislav; Stewart, Angela; Gamble, Gregory D.; Reid, Ian R.; Bastin, Sonja. Effect of Zoledronate on Lower Respiratory Infections in Older Women: Secondary Analysis of a Randomized Controlled Trial. <i>Calcified tissue international</i> 2021;109(1):12-16                                                                        | Wrong patient population               |
| 292. | Horne     | 2021<br>a | Horne, Anne M.; Mihov, Borislav; Stewart, Angela; Gamble, Gregory D.; Reid, Ian R.; Bolland, Mark J.; Bastin, Sonja. Predictors of Fracture in Older Women With Osteopenic Hip Bone Mineral Density Treated With Zoledronate. <i>Journal of Bone and Mineral Research</i> 2021;36(1):61-66                                                                   | Wrong outcomes                         |
| 293. | Hosoi     | 2013      | Hosoi, T.; Matsumoto, T.; Sugimoto, T.; Miki, T.; Gorai, I.; Yoshikawa, H.; Tanaka, Y.; Tanaka, S.; Fukunaga, M.; Sone, T.; Nakano, T.; Ito, M.; Matsui, S.; Yoneda, T.; Takami, H.; Nakamura, T.. Results of 2-year data from denosumab fracture intervention randomized placebo controlled trial (direct). <i>Osteoporosis International</i> 2013;1):S177. | Conference abstract                    |

| No.  | Authors | Year      | Reference (extracted from covidence)                                                                                                                                                                                                                                                                                                                                                                | Reasons for exclusion                  |
|------|---------|-----------|-----------------------------------------------------------------------------------------------------------------------------------------------------------------------------------------------------------------------------------------------------------------------------------------------------------------------------------------------------------------------------------------------------|----------------------------------------|
| 294. | Hou     | 2015      | Hou, Y.; Gu, K.; Xu, C.; Ding, H.; Liu, C.; Tuoheti, Y.. Dose-effectiveness relationships determining the efficacy of ibandronate for management of osteoporosis: A meta-analysis. <i>Medicine (United States)</i> 2015;94 (26) (no pagination)(e1007).                                                                                                                                             | Systematic review and/or meta-analysis |
| 295. | Hou     | 2015<br>a | Hou, Y.; Gu, K.; Xu, C.; Ding, H.; Liu, C.; Tuoheti, Y.. Dose-Effectiveness Relationships Determining the Efficacy of Ibandronate for Management of Osteoporosis: A Meta-Analysis. <i>Medicine</i> 2015;94(26):e1007                                                                                                                                                                                | Systematic review and/or meta-analysis |
| 296. | Hoy     | 2020      | Hoy, Jennifer; Kerr, Stephen J.; Hans, Didier; Pocock, Nicholas; Carr, Andrew. Change in trabecular bone score (TBS) after zoledronic acid infusion or TDF switch. <i>Topics in Antiviral Medicine</i> 2020;28(1):254                                                                                                                                                                               | Conference abstract, with no new data  |
| 297. | Ikeda   | 2017      | Ikeda, S.. The effect of once-weekly teriparatide administration on prevention of vertebral collapse in new thoracolumbar vertebral fractures-T-WRAP prospective randomized controlled study. <i>Journal of Bone and Mineral Research</i> December 2017;32 (Supplement 1):S162                                                                                                                      | Conference abstract                    |
| 298. | Ikeda   | 2017      | Ikeda, S.; Nakamura, E.; Narusawa, K.; Fukuda, F.; Matsumoto, H.; Nakai, K.; Sakata, T.; Yoshioka, T.; Fujino, Y.; Sakai, A. Comparison of once-weekly teriparatide and alendronate against new osteoporotic vertebral fractures at week 12. <i>Journal of Bone and Mineral Metabolism</i> . 2019;:                                                                                                 | Wrong patient population               |
| 299. | Ikeda   | 2019      | Ikeda, Terumasa; Akagi, Masao; Kaji, Hiroshi; Tamura, Yukinori. Once-weekly teriparatide reduces serum sclerostin levels in postmenopausal women with osteoporosis. <i>Journal of Orthopaedic Science</i> 2019;24(3):532-538                                                                                                                                                                        | Wrong patient population               |
| 300. | Ikeda   | 2020      | Ikeda, Satoshi; Nakamura, Eiichiro; Narusawa, Kenichiro; Fukuda, Fumio; Matsumoto, Hidehiro; Nakai, Kenichiro; Sakata, Takeshi; Yoshioka, Toru; Fujino, Yoshihisa; Sakai, Akinori; Kotu T. Wrap Study Investigators. Comparison of once-weekly teriparatide and alendronate against new osteoporotic vertebral fractures at week 12. <i>Journal of bone and mineral metabolism</i> 2020;38(1):44-53 | Wrong patient population               |
| 301. | Ilter   | 2006      | Ilter, E.; Karalok, H.; Tufekci, E. C.; Batur, O.. Efficacy and acceptability of risedronate 5 mg daily compared with 35 mg once weekly for the treatment of postmenopausal osteoporosis. <i>Climacteric</i> 2006;9(2):129-134.                                                                                                                                                                     | Wrong comparator                       |
| 302. | Imai    | 2009      | Imai, K.; Ohnishi, I.; Matsumoto, T.; Yamamoto, S.; Nakamura, K. Assessment of vertebral fracture risk and therapeutic effects of alendronate in postmenopausal women using a quantitative computed tomography-based nonlinear finite element method. <i>Osteoporosis International</i> May 2009;20(5):801-810                                                                                      | Wrong patient population               |

| No.             | Authors  | Year | Reference (extracted from covidence)                                                                                                                                                                                                                                                                                                                 | Reasons for exclusion                         |
|-----------------|----------|------|------------------------------------------------------------------------------------------------------------------------------------------------------------------------------------------------------------------------------------------------------------------------------------------------------------------------------------------------------|-----------------------------------------------|
| 303.3<br>2<br>3 | Iseri    | 2019 | Iseri, K.; Watanabe, M.; Yoshikawa, H.; Mitsui, H.; Endo, T.; Yamamoto, Y.; Iyoda, M.; Ryu, K.; Inaba, T.; Shibata, T.. Effects of Denosumab and Alendronate on Bone Health and Vascular Function in Hemodialysis Patients: A Randomized, Controlled Trial. <i>Journal of Bone &amp; Mineral Research</i> 2019;28:28.                                | Wrong patient population                      |
| 304.            | Ito      | 2017 | Ito, M.; Nakamura, T.; Hagino, H.; Hashimoto, J.; Asao, Y.; Yamamoto, M.; Endo, K.; Katsumata, K.; Matsumoto, R.; Nakano, T.; et al.,. Monthly oral ibandronate 100mg is as effective as monthly intravenous ibandronate 1mg in patient subgroups of the movest study. <i>Journal of Bone and Mineral Research</i> 2017;31. [DOI: 10.1002/jbmr.3107] | Conference abstract                           |
| 305.            | Iwamoto  | 2007 | Iwamoto, J.; Takeda, T.; Sato, Y.; Uzawa, M.. Comparison of the effect of alendronate on lumbar bone mineral density and bone turnover in men and postmenopausal women with osteoporosis. <i>Clinical Rheumatology</i> 2007;26(2):161-167.                                                                                                           | Wrong study design                            |
| 306.            | Iwamoto  | 2008 | Iwamoto, J.; Sato, Y.; Uzawa, M.; Takeda, T.; Matsumoto, H.. Comparison of effects of alendronate and raloxifene on lumbar bone mineral density, bone turnover, and lipid metabolism in elderly women with osteoporosis. <i>Yonsei Medical Journal</i> 2008;49(1):119-128.                                                                           | Wrong patient population                      |
| 307.            | Jacobsen | 2012 | Jacobsen, D. E.; Melis, R. J.; Verhaar, H. J.; Olde Rikkert, M. G.. Raloxifene and tibolone in elderly women: a randomized, double-blind, double-dummy, placebo-controlled trial. <i>Journal of the American Medical Directors Association</i> 2012;13(2):189.e1-7                                                                                   | Wrong outcomes                                |
| 308.            | Jacques  | 2010 | Jacques, R. M.; Reid, D.; Zanchetta, J.; Vukicevic, S.; Thompson, D.; Thompson, J.; Cummings, S.; Eastell, R.. The percentage reduction in vertebral fracture risk with lasofox-ifene explained by change in spine bone mineral density. <i>Bone</i> 2010;1):S207.                                                                                   | Conference abstract                           |
| 309.            | Jamal    | 2007 | Jamal, S. A.; Bauer, D. C.; Ensrud, K. E.; Cauley, J. A.; Hochberg, M.; Ishani, A.; Cummings, S. R.. Alendronate treatment in women with normal to severely impaired renal function: An analysis of the fracture intervention trial. <i>Journal of Bone and Mineral Research</i> 2007;22(4):503-508.                                                 | Wrong patient population (sub group analysis) |
| 310.            | Jansen   | 2011 | Jansen, J. P.; Bergman, G. J. D.; Huels, J.; Olson, M.. The Efficacy of Bisphosphonates in the Prevention of Vertebral, Hip, and Nonvertebral-Nonhip Fractures in Osteoporosis: A Network Meta-Analysis. <i>Seminars in Arthritis and Rheumatism</i> 2011;40(4):275-284.e2.                                                                          | Systematic review and/or meta-analysis        |
| 311.            | Jean     | 2015 | Jean, S.; Bessette, L.; Ste-Marie, L. G.; Brown, J. P.. Denosumab compared to other treatments to prevent or treat osteoporosis: A systematic review and meta-analysis. <i>Journal of Bone and Mineral Research</i> . Conference 2015;30(Supplement 1).                                                                                              | Conference abstract                           |

| No.  | Authors   | Year      | Reference (extracted from covidence)                                                                                                                                                                                                                                                                                                                          | Reasons for exclusion                  |
|------|-----------|-----------|---------------------------------------------------------------------------------------------------------------------------------------------------------------------------------------------------------------------------------------------------------------------------------------------------------------------------------------------------------------|----------------------------------------|
| 312. | Jin       | 2018      | Jin, Y. Z.; Lee, J. H.. Effect of medications on secondary prevention of Osteoporotic Vertebral Compression Fracture: A meta-analysis of randomized controlled trials. <i>Calcified Tissue International</i> 2018;102 (1 Supplement 1):S137-S138.                                                                                                             | Conference abstract                    |
| 313. | Jin       | 2019      | Jin, Y. Z.; Lee, J. H.; Xu, B.; Cho, M.. Effect of medications on prevention of secondary osteoporotic vertebral compression fracture, non-vertebral fracture, and discontinuation due to adverse events: A meta-analysis of randomized controlled trials. <i>BMC Musculoskeletal Disorders</i> 31 Aug 2019;20 (1) (no pagination)(399)                       | Systematic review and/or meta-analysis |
| 314. | Jin       | 2019      | Jin, Yuan-Zhe; Cho, Minjoon; Lee, Jae Hyup; Xu, Bin. Effect of medications on prevention of secondary osteoporotic vertebral compression fracture, non-vertebral fracture, and discontinuation due to adverse events: A meta-analysis of randomized controlled trials. <i>BMC musculoskeletal disorders</i> 2019;20(1):399                                    | Systematic review and/or meta-analysis |
| 315. | Johansson | 2017      | Johansson, H.; McCloskey, E.; Oden, A.; Harvey, N. C.; Jiang, H.; Modin, S.; Fitzpatrick, L. A.; Kanis, J. A.. The efficacy of abaloparatide-SC is independent of baseline BMD. <i>Osteoporosis International</i> 2017;28 (Supplement 1):S519                                                                                                                 | Conference abstract                    |
| 316. | Johansson | 2017<br>a | Johansson, H.; McCloskey, E.; Oden, A.; Harvey, N. C.; Black, D. M.; Cauley, J.; Kanis, J. A.. The effect of alendronate on vertebral fracture risk is independent of baseline frax fracture probability: A post HOC analysis of the fit study. <i>Osteoporosis International</i> 2017;28 (Supplement 1):S619.                                                | Conference abstract                    |
| 317. | Johansson | 2010      | Johansson, H.; Oden, A.; Chines, A.; Kanis, J.; McCloskey, E. Non-vertebral fracture risk reduction by bazedoxifene. <i>Bone</i> June 2010;1()():S211                                                                                                                                                                                                         | Conference abstract                    |
| 318. | Johnell   | 2002      | Johnell, O.; Scheele, W. H.; Lu, Y.; Reginster, J. Y.; Need, A. G.; Seeman, E.. Additive effects of raloxifene and alendronate on bone density and biochemical markers of bone remodeling in postmenopausal women with osteoporosis. <i>Journal of Clinical Endocrinology and Metabolism</i> 2002;87(3):985-992.                                              | Wrong outcomes                         |
| 319. | Johnson   | 2007      | Johnson, B. E.. A once yearly IV infusion of zoledronic acid prevented fractures in postmenopausal women with osteoporosis. <i>Evidence-Based Medicine</i> October 2007;12(5):145                                                                                                                                                                             | Commentary                             |
| 320. | Jundi     | 2019      | Jundi, Bakr; Lyu, Houchen; Xu, Chang; Tedeschi, Sara K.; Yoshida, Kazuki; Zhao, Sizheng; Nigwekar, Sagar U.; Leder, Benjamin Z.; Solomon, Daniel H. Comparison of Denosumab and Bisphosphonates in Patients with Osteoporosis: A Meta-Analysis of Randomized Controlled Trials. <i>Journal of Clinical Endocrinology and Metabolism</i> 2019;104(5):1753-1765 | Systematic review and/or meta-analysis |



| No.  | Authors | Year | Reference (extracted from covidence)                                                                                                                                                                                                                                                                                                                                          | Reasons for exclusion                  |
|------|---------|------|-------------------------------------------------------------------------------------------------------------------------------------------------------------------------------------------------------------------------------------------------------------------------------------------------------------------------------------------------------------------------------|----------------------------------------|
| 321. | Kanis   | 2010 | Kanis, J.; Johansson, H.; Oden, A.; McCloskey, E.. The effect of raloxifene on vertebral and non-vertebral fracture risk is independent of baseline FRAX probability. <i>Journal of Bone and Mineral Research</i> 2010;1):S126.                                                                                                                                               | Conference abstract                    |
| 322. | Kataoka | 2020 | Kataoka, Yuki; Luo, Yan; Chaimani, Anna; Onishi, Akira; Kimachi, Miho; Tsujimoto, Yasushi; Murad, Mohammad Hassan; Li, Tianjing; Cipriani, Andrea; Furukawa, Toshi A. Cumulative network meta-analyses, practice guidelines, and actual prescriptions for postmenopausal osteoporosis: a meta-epidemiological study. <i>Archives of osteoporosis</i> 2020;15(1):21            | Systematic review and/or meta-analysis |
| 323. | Kaufman | 2012 | Kaufman, J. M.; Palacios, S.; Silverman, S.; Sutradhar, S.; Chines, A. A. The effects of bazedoxifene and raloxifene on vertebral, nonvertebral, and all clinical fractures as a function of baseline fracture risk assessed by FRAX. <i>Osteoporosis International</i> March 2012;2():S278-S279                                                                              | Conference abstract                    |
| 324. | Keaveny | 2017 | Keaveny, T. M.; Crittenden, D. B.; Bolognese, M. A.; Genant, H. K.; Engelke, K.; Oliveri, B.; Brown, J. P.; Langdahl, B. L.; Yan, C.; Grauer, A.; Libanati, C.. Greater Gains in Spine and Hip Strength for Romosozumab Compared With Teriparatide in Postmenopausal Women With Low Bone Mass. <i>Journal of Bone and Mineral Research</i> 2017;32(9):1956-1962.              | Wrong outcomes                         |
| 325. | Keaveny | 2010 | Keaveny, T.; McClung, M.; Genant, H.; Zanchetta, J. R.; Kendler, D. L.; Brown, J.; Goemaere, S.; Recknor, C.; Brandi, M. L.; Eastell, R.; Engelke, K.; Fuerst, T.; Radcliffe, H. S.; Libanati, C. Denosumab improves both femoral and vertebral strength in women with osteoporosis: Results from the freedom trial. <i>Journal of Bone and Mineral Research</i> 2010;1():S31 | Conference abstract                    |
| 326. | Kendler | 2011 | Kendler, D. L.; McClung, M. R.; Freemantle, N.; Lillestol, M.; Moffett, A. H.; Borenstein, J.; Satram-Hoang, S.; Yang, Y. C.; Kaur, P.; Macarios, D.; Siddhanti, S.. Adherence, preference, and satisfaction of postmenopausal women taking denosumab or alendronate. <i>Osteoporosis International</i> 2011;22(6):1725-1735.                                                 | Wrong outcomes                         |
| 327. | Kendler | 2012 | Kendler, D.; Lillestol, M. J.; Moffett, A. H.; Satram-Hoang, S.; Huang, J.; Tang, E. T.; Kaur, P.. Influence of patient perceptions and preferences about osteoporosis medication on adherence in the denosumab adherence, preference, and satisfaction (DAPS) study. <i>Menopause</i> 2012;19(12):1390.                                                                      | Conference abstract                    |
| 328. | Kendler | 2013 | Kendler, D.. Sustainability of anti-fracture efficacy and safety of denosumab in postmenopausal                                                                                                                                                                                                                                                                               | Conference abstract                    |

| No.  | Authors | Year      | Reference (extracted from covidence)                                                                                                                                                                                                                                                                                                                                                                                                                                                           | Reasons for exclusion                 |
|------|---------|-----------|------------------------------------------------------------------------------------------------------------------------------------------------------------------------------------------------------------------------------------------------------------------------------------------------------------------------------------------------------------------------------------------------------------------------------------------------------------------------------------------------|---------------------------------------|
|      |         |           | osteoporosis. <i>Osteoporosis International</i> 2013;4):S653-S654.                                                                                                                                                                                                                                                                                                                                                                                                                             |                                       |
| 329. | Kendler | 2017      | Kendler, D. L.; Zerbini, C.; Russo, L.; Greenspan, S.; Zikan, V.; Bagur, A.; Malouf, J.; Lakatos, P.; Fahrleitner-Pammer, A.; Lespessailles, E.; Minisola, S.; Body, J. J.; Geusens, P.; Moericke, R.; Lopez-Romero, P.; Marin, F.. Effects of 24 months treatment of teriparatide compared with risedronate on new fractures in postmenopausal women with severe osteoporosis: A randomized, double-dummy, clinicaltrial. <i>Osteoporosis International</i> 2017;28 (1 Supplement 1):S69-S70. | Conference abstract                   |
| 330. | Kendler | 2017<br>a | Kendler, D. L.; Bone, H. G.; Massari, F.; Gielen, E.; Palacios, S.; Maddox, J.; Yan, C.; Libanati, C.; Yue, S.; Grauer, A.. Retreatment with romosozumab after 12 months of placebo demonstrates similar BMD efficacy compared with initial romosozumab treatment. <i>Endocrine Reviews</i> . Conference: 99th Annual Meeting of the Endocrine Society, ENDO 2017;38(3 Supplement 1)                                                                                                           | Conference abstract                   |
| 331. | Kendler | 2017<br>b | Kendler, D. L.; Chines, A.; Brandi, M. L.; Papapoulos, S.; Lewiecki, E. M.; Reginster, J. Y.; Roux, C.; Munoz Torres, M.; Wang, A.; Bone, H. G.. The risk of subsequent osteoporotic fractures is decreased in patients experiencing fracture while on denosumab: Results from the freedom and freedom extension studies. <i>Endocrine Reviews</i> . Conference: 99th Annual Meeting of the Endocrine Society, ENDO 2017;38(3 Supplement 1)                                                    | Conference abstract                   |
| 332. | Kendler | 2019      | Kendler, D.; Chines, A.; Clark, P.; Ebeling, P. R.; McClung, M.; Rhee, Y.; Huang, S.; Stad, R. K.. Bone Mineral Density After Transitioning From Denosumab to Alendronate. <i>The Journal of clinical endocrinology and metabolism</i> . 2019;26                                                                                                                                                                                                                                               | Wrong study design                    |
| 333. | Kendler | 2019<br>a | Kendler, D. L.; Bone, H. G.; Massari, F.; Gielen, E.; Palacios, S.; Maddox, J.; Yan, C.; Yue, S.; Dinavahi, R. V.; Libanati, C.; Grauer, A.. Bone mineral density gains with a second 12-month course of romosozumab therapy following placebo or denosumab. <i>Osteoporosis International: a journal established as result of cooperation between the European Foundation for Osteoporosis and the National Osteoporosis Foundation of the USA</i> . 2019;18                                  | Wrong outcomes                        |
| 334. | Kendler | 2019<br>d | Kendler, D. L.; Marin, F.; Lopez-Romero, P.; Geusens, P.; Lespessailles, E.; Body, J. J.; Minisola, S. Psychotropic medications and proton pump inhibitors and the risk of fractures in the teriparatide vs. risedronate 'vero' clinical trial. <i>Osteoporosis International</i> 2019;30(SUPPL 2):S286                                                                                                                                                                                        | Conference abstract, with no new data |
| 335. | Kendler | 2019<br>e | Kendler, David; Chines, Arkadi; Huang, Shuang; Clark, Patricia; Ebeling, Peter R.; McClung, Michael; Rhee, Yumie; Kees Stad, Robert; Freemantle, Nick.                                                                                                                                                                                                                                                                                                                                         | Conference abstract, with no new data |

| No.  | Authors    | Year  | Reference (extracted from covidence)                                                                                                                                                                                                                                                                                                                                                                          | Reasons for exclusion                  |
|------|------------|-------|---------------------------------------------------------------------------------------------------------------------------------------------------------------------------------------------------------------------------------------------------------------------------------------------------------------------------------------------------------------------------------------------------------------|----------------------------------------|
|      |            |       | Subject characteristics and changes in bone mineral density after transitioning from denosumab to alendronate in the denosumab Adherence Preference Satisfaction (DAPS) Study. <i>Arthritis and Rheumatology</i> 2019;71(Supplement 10):3344-3345                                                                                                                                                             |                                        |
| 336. | Kendler    | 2019f | Kendler, David; Clark, Patricia; Ebeling, Peter R.; McClung, Michael; Rhee, Yumie; Chines, Arkadi; Huang, Shuang; Stad, Robert Kees; Freemantle, Nick. Subject characteristics and changes in bone mineral density after transitioning from denosumab to alendronate in the denosumab adherence preference satisfaction (DAPS) study. <i>Journal of Bone and Mineral Research</i> 2019;34(Supplement 1):15-16 | Conference abstract, with no new data  |
| 337. | Kendler    | 2020  | Kendler, D. L.; Marin, F.; Geusens, P.; Lopez-Romero, P.; Lespessailles, E.; Body, J. J.; Minisola, S.. Psychotropic medications and proton pump inhibitors and the risk of fractures in the teriparatide versus risedronate VERO clinical trial. <i>Bone</i> January 2020;130 (no pagination)(115113)                                                                                                        | Wrong study design                     |
| 338. | Khalilli   | 2018  | Khalili, M.; Hosseinzadeh, A.; Kiavandani, H. M.; Khanjani, N.. Effects of Bazedoxifene on Bone Mineral Density and Fracture in Post-Menopausal Osteoporotic Women: a Systematic Review and Meta-Analysis. <i>Clinical Reviews in Bone and Mineral Metabolism</i> 2018;16(1):22-32.                                                                                                                           | Systematic review and/or meta-analysis |
| 339. | Kirazli    | 2019  | Kirazli, Y. Osteoporotic hip fractures: Are we able to prevent? <i>Osteoporosis International</i> 2019;30(SUPPL 2):S239                                                                                                                                                                                                                                                                                       | Conference abstract, with no new data  |
| 340. | Kmietowicz | 2015  | Kmietowicz, Z.. Zoledronic acid increases bone density but does not reduce fractures in frail elderly people, study finds. <i>BMJ (Online)</i> 2015;350. [DOI: 10.1136/bmj.h1949]                                                                                                                                                                                                                             | Commentary                             |
| 341. | Kotlarczyk | 2020  | Kotlarczyk, Mary P.; Perera, Subashan; Resnick, Neil M.; Nace, David A.; Greenspan, Susan L. Early changes in bone turnover predict longer-term changes in bone mineral density but not trabecular bone score in frail older women. <i>Archives of osteoporosis</i> 2020;15(1):79                                                                                                                             | Wrong outcomes                         |
| 342. | Kravvariti | 2020  | Kravvariti, Evrydiki; Mourtidou, Pelagia; Sfikakis, Petros P. Nocebo effects increase with advancing age in clinical trials of bisphosphonate therapy for osteoporotic vertebral compression fracture prevention. <i>European Geriatric Medicine</i> 2020;11(SUPPL 1):S208                                                                                                                                    | Conference abstract, with no new data  |
| 343. | Kurth      | 2019  | Kurth, A. A. Is there a role for local bone treatment in osteoporosis? <i>Osteoporosis International</i> 2019;30(SUPPL 2):S206-S207                                                                                                                                                                                                                                                                           | Conference abstract, with no new data  |
| 344. | Kurth      | 2019  | Kurth, A.; Marin, F.; Eriksen, E. F.; Kendler, D. L.; Krege, J. H.; Delgado-Rodriguez, M. Effects of teriparatide on hip and upper limb fractures in                                                                                                                                                                                                                                                          | Conference abstract, with no new data  |

| No.  | Authors  | Year | Reference (extracted from covidence)                                                                                                                                                                                                                                                                                                                                                                                                                                                                                                                                                                                                              | Reasons for exclusion                  |
|------|----------|------|---------------------------------------------------------------------------------------------------------------------------------------------------------------------------------------------------------------------------------------------------------------------------------------------------------------------------------------------------------------------------------------------------------------------------------------------------------------------------------------------------------------------------------------------------------------------------------------------------------------------------------------------------|----------------------------------------|
|      |          |      | patients with osteoporosis: A systematic review and meta-analysis. <i>Osteologie</i> 2019;28(1):52                                                                                                                                                                                                                                                                                                                                                                                                                                                                                                                                                |                                        |
| 345. | Kurth    | 2020 | Kurth, A. A. Local bone enhancement treatment in high risk osteoporotic patients. <i>Osteoporosis International</i> 2020;31(SUPPL 1):S79-S80                                                                                                                                                                                                                                                                                                                                                                                                                                                                                                      | Conference abstract, with no new data  |
| 346. | Lan      | 2019 | Lan, X.; Ma, H.; Zhang, Z.; Ye, D.; Min, J.; Cai, F.; Luo, J. Denosumab versus bisphosphonates for treatment of postmenopausal osteoporosis: A meta-analysis. <i>International Journal of Clinical and Experimental Medicine</i> 2019;12(9):11037-11048                                                                                                                                                                                                                                                                                                                                                                                           | Systematic review and/or meta-analysis |
| 347. | Lan      | 2019 | Lan, Xiaoyong; Luo, Jun; Ma, Haiping; Zhang, Zhiping; Ye, Dong; Cai, Feng; Min, Jun. Denosumab versus bisphosphonates for treatment of postmenopausal osteoporosis: A meta-analysis. <i>International Journal of Clinical and Experimental Medicine</i> 2019;12(9):11037-11048                                                                                                                                                                                                                                                                                                                                                                    | Systematic review and/or meta-analysis |
| 348. | Lane     | 2012 | Lane, N.; Fuerst, T.; Levine, A. B.; Hines, T.; Williams, R.; Sutradhar, S.; Chines, A. Effects of bazedoxifene on intervertebral disc height and association with incident vertebral fractures in postmenopausal women. <i>Journal of Bone and Mineral Research. Conference</i> 2012;27(SUPPL. 1):                                                                                                                                                                                                                                                                                                                                               | Conference abstract                    |
| 349. | Langdahl | 2016 | Langdahl, B.; Libanati, C.; Crittenden, D.; Bolognese, M.; Brown, J.; Daizadeh, N.; Dokoupilova, E.; Engelke, K.; Finkelstein, J.; Genant, H.; Goemaere, S.; Hyldstrup, L.; Jodar-Gimeno, E.; Keaveny, T.; Kendler, D.; Lakatos, P.; Maddox, J.; Malouf, J.; Massari, F.; Molina, J.; Ulla, M.; Grauer, A.. Superior gains in bone mineral density and estimated strength at the hip for romosozumab compared with teriparatide in women with postmenopausal osteoporosis transitioning from bisphosphonate therapy: Results of the phase 3 open-label structure study. <i>Annals of the Rheumatic Diseases</i> June 2016;75 (Supplement 2):92-93 | Conference abstract                    |
| 350. | Lecart   | 2004 | Lecart, M. P.; Bruyere, O.; Reginster, J. Y.. Combination/sequential therapy in osteoporosis. <i>Current Osteoporosis Reports</i> Dec 2004;2(4):123-130                                                                                                                                                                                                                                                                                                                                                                                                                                                                                           | Systematic review and/or meta-analysis |
| 351. | Leder    | 2007 | Leder, B. Z. Is parathyroid hormone (1-84) a safe and effective treatment for postmenopausal osteoporosis?. <i>Nature Clinical Practice Endocrinology and Metabolism</i> November 2007;3(11):746-747                                                                                                                                                                                                                                                                                                                                                                                                                                              | Commentary                             |
| 352. | Leder    | 2018 | Leder, B.; Zapalowski, C.; Hu, M. Y.; Hattersley, G. Fracture and bone mineral density response by baseline risk in patients treated with abaloparatide followed by alendronate. <i>Arthritis and Rheumatology</i> September 2018;70 (Supplement 9):3158-3159                                                                                                                                                                                                                                                                                                                                                                                     | Extension study                        |
| 353. | Leder    | 2019 | Leder, B. Z.; Zapalowski, C.; Hu, M. Y.; Hattersley, G.; Lane, N. E.; Singer, A. J.; Dore, R. K.. Fracture                                                                                                                                                                                                                                                                                                                                                                                                                                                                                                                                        | Extension study                        |

| No.  | Authors  | Year | Reference (extracted from covidence)                                                                                                                                                                                                                                                                                                                                                                                                  | Reasons for exclusion                  |
|------|----------|------|---------------------------------------------------------------------------------------------------------------------------------------------------------------------------------------------------------------------------------------------------------------------------------------------------------------------------------------------------------------------------------------------------------------------------------------|----------------------------------------|
|      |          |      | and Bone Mineral Density Response by Baseline Risk in Patients Treated With Abaloparatide Followed by Alendronate: Results From the Phase 3 ACTIVExtend Trial. <i>Journal of Bone and Mineral Research</i> . 2019                                                                                                                                                                                                                     |                                        |
| 354. | Lee      | 2001 | Lee, V. K.. Management of osteoporosis in the nursing home setting. <i>Annals of Long-Term Care</i> 2001;9(9):32-42                                                                                                                                                                                                                                                                                                                   | Systematic review and/or meta-analysis |
| 355. | Lee      | 2018 | Lee, S. Y.; Jung, S. H.; Lee, S. U.; Ha, Y. C.; Lim, J. Y.. Can Bisphosphonates Prevent Recurrent Fragility Fractures? A Systematic Review and Meta-Analysis of Randomized Controlled Trials. <i>Journal of the American Medical Directors Association</i> 2018;19(5):384-390.e1.                                                                                                                                                     | Systematic review and/or meta-analysis |
| 356. | Levine   | 2010 | Levine, A. B.; Ciesielska, M.; Chines, A.. Efficacy and safety of bazedoxifene in postmenopausal African American women. <i>Journal of Bone and Mineral Research</i> 2010;1):S125-S126.                                                                                                                                                                                                                                               | Conference abstract                    |
| 357. | Levis    | 2002 | Levis, S.; Quandt, S. A.; Thompson, D.; Scott, J.; Schneider, D. L.; Ross, P. D.; Black, D.; Suryawanshi, S.; Hochberg, M.; Yates, J.. Alendronate reduces the risk of multiple symptomatic fractures: Results from the Fracture Intervention Trial. <i>Journal of the American Geriatrics Society</i> 2002;50(3):409-415.                                                                                                            | Wrong outcomes                         |
| 358. | Lewiecki | 2008 | Lewiecki, E. M.; Babbitt, A. M.; Piziak, V. K.; Ozturk, Z. E.; Bone, H. G.. Adherence to and Gastrointestinal Tolerability of Monthly Oral or Quarterly Intravenous Ibandronate Therapy in Women with Previous Intolerance to Oral Bisphosphonates: A 12-Month, Open-Label, Prospective Evaluation. <i>Clinical Therapeutics</i> April 2008;30(4):605-621                                                                             | Wrong study design                     |
| 359. | Lewiecki | 2017 | Lewiecki, E. M.; Dinavahi, R. V.; Lazaretti-Castro, M.; Ebeling, P. R.; Adachi, J. D.; Miyauchi, A.; Gielen, E.; Milmont, C. E.; Libanati, C.; Grauer, A.. Continued fracture risk reduction after 12 months of romosozumab followed by denosumab through 36 months in the phase 3 FRAME (FRActure study in postmenopausal woMen with ostEoporosis) Extension. <i>Journal of Bone and Mineral Research</i> 2017;32 (Supplement 1):S24 | Extension study                        |
| 360. | Li       | 2005 | Li, Y.; Zhang, Z.; Deng, X.; Chen, L.. Efficacy and safety of risedronate sodium in treatment of postmenopausal osteoporosis. <i>Journal of Huazhong University of Science and Technology. Medical Sciences</i> 2005;25(5):527-9                                                                                                                                                                                                      | Wrong outcomes                         |
| 361. | Li       | 2015 | Li, W.; Chen, W.; Lin, Y.. The efficacy of parathyroid hormone analogues in combination with bisphosphonates for the treatment of osteoporosis: A meta-analysis of randomized controlled trials. <i>Medicine (United States)</i> 2015;94 (38) (no pagination)(e1156).                                                                                                                                                                 | Systematic review and/or meta-analysis |

| No.  | Authors  | Year      | Reference (extracted from covidence)                                                                                                                                                                                                                                                                                                        | Reasons for exclusion                  |
|------|----------|-----------|---------------------------------------------------------------------------------------------------------------------------------------------------------------------------------------------------------------------------------------------------------------------------------------------------------------------------------------------|----------------------------------------|
| 362. | Li       | 2015      | Li, W.; Chen, W.; Lin, Y.. The Efficacy of Parathyroid Hormone Analogues in Combination With Bisphosphonates for the Treatment of Osteoporosis: A Meta-Analysis of Randomized Controlled Trials. <i>Medicine</i> 2015;94(38):e1156                                                                                                          | Systematic review and/or meta-analysis |
| 363. | Li       | 2016      | Li, M.; Gurbuz, S.; Zhang, B.; Li, Y. J.; Chen, Y.. Effect of teriparatide in chinese and caucasian postmenopausal women with osteoporosis: Bridging findings on efficacy. <i>Osteoporosis International</i> 2016;1):S216.                                                                                                                  | Conference abstract                    |
| 364. | Li       | 2016<br>a | Li, Y.; Zhao, W. B.; Wang, D. L.; He, Q.; Li, Q.; Pei, F. X.; Liu, L.. Treatment of osteoporotic intertrochanteric fractures by zoledronic acid injection combined with proximal femoral nail anti-rotation. <i>Chinese Journal of Traumatology - English Edition</i> 2016;19(5):259-263.                                                   | Wrong patient population               |
| 365. | Libanati | 2010      | Libanati, C.; Seeman, E.; Thomas, T.; Boyd, S.; Boutroy, S.; Shane, E.; Hanley, D.; Bogado, C.; Cheung, A.; Majumdar, S.; Sellmayer, D.; Kearns, A.; Delmas, P.; Fan, M.; Zanchetta, J.. Denosumab and alendronate have different effects at the ultradistal radius in postmenopausal women with low bone mass. <i>Bone</i> 2010;1):S28-S29 | Conference abstract                    |
| 366. | Liedholm | 1996      | Liedholm, H.; Linne, A. B.; McGrath Jr, H.; Liberman, U.; Karpf, D. B.; Capizzi, T.. Alendronate in postmenopausal osteoporosis [2]. <i>New England Journal of Medicine</i> 1996;334(11):733-735                                                                                                                                            | Commentary                             |
| 367. | Lim      | 2017      | Lim, S. J.; Kim, K.; Park, Y. S.. Effect of osteoporosis medications on refracture and mortality following hip fracture surgery in postmenopausal women: A prospective randomized trial. <i>Osteoporosis International</i> 2017;28 (Supplement 1):S250.                                                                                     | Conference abstract                    |
| 368. | Lin      | 2014      | Lin, T.; Yan, S. G.; Cai, X. Z.; Ying, Z. M.; Yuan, F. Z.; Zuo, X.. Alendronate versus raloxifene for postmenopausal women: A meta-analysis of seven head-to-head randomized controlled trials. <i>International Journal of Endocrinology</i> 2014;2014 (no pagination)(796510):                                                            | Systematic review and/or meta-analysis |
| 369. | Lin      | 2021      | Lin, Shih-Yin; Hung, Min-Chih; Chang, Shih-Fu; Chang, Jenny Zwei-Chieng; Tsuang, Fon-Yih; Sun, Jui-Sheng. Efficacy and safety of postmenopausal osteoporosis treatments: A systematic review and network meta-analysis of randomized controlled trials. <i>Journal of Clinical Medicine</i> 2021;10(14):3043                                | Systematic review and/or meta-analysis |
| 370. |          | 2009      | Lindsay, R.; Gallagher, J. C.; Kagan, R.; Pickar, J. H.; Constantine, G.. Efficacy of tissue-selective estrogen complex of bazedoxifene/conjugated estrogens for osteoporosis prevention in at-risk postmenopausal women. <i>Fertility and Sterility</i> 2009;92(3):1045-1052.                                                              | Wrong outcomes                         |
| 371. | Lippuner | 2010      | Lippuner, K.; Adachi, J.; Cummings, S.; Man, Z.; Farrerons, J.; Torring, O.; Gallagher, J.; McClung,                                                                                                                                                                                                                                        | Conference abstract                    |

| No.  | Authors | Year      | Reference (extracted from covidence)                                                                                                                                                                                                                                                                                                                                                                                                  | Reasons for exclusion                  |
|------|---------|-----------|---------------------------------------------------------------------------------------------------------------------------------------------------------------------------------------------------------------------------------------------------------------------------------------------------------------------------------------------------------------------------------------------------------------------------------------|----------------------------------------|
|      |         |           | M.; Franchimont, N.; Martin, J. S.; Wang, A.; Boonen, S. Effect of denosumab on the incidence of hip and new vertebral fractures in postmenopausal women with high fracture risk: A subanalysis of the FREEDOM study. <i>Bone March 2010;11(1):S27-S28</i>                                                                                                                                                                            |                                        |
| 372. | Liu     | 2015      | Liu, M.; Guo, L.; Pei, Y.; Li, N.; Jin, M.; Ma, L.; Liu, Y.; Sun, B.; Li, C.. Efficacy of zoledronic acid in treatment of osteoporosis in men and women-a meta-analysis. <i>International Journal of Clinical and Experimental Medicine 2015;8(3):3855-3861.</i>                                                                                                                                                                      | Systematic review and/or meta-analysis |
| 373. | Liu     | 2017      | Liu, C. L.; Lee, H. C.; Chen, C. C.; Cho, D. Y.. Head-to-head comparisons of bisphosphonates and teriparatide in osteoporosis: a meta-analysis. <i>Clinical and investigative medicine 2017;Medecine clinique et experimentale. 40(3):E146-E157.</i>                                                                                                                                                                                  | Systematic review and/or meta-analysis |
| 374. | Liu     | 2018      | Liu, G. F.; Wang, Z. Q.; Liu, L.; Zhang, B. T.; Miao, Y. Y.; Yu, S. N.. A network meta-analysis on the short-term efficacy and adverse events of different anti-osteoporosis drugs for the treatment of postmenopausal osteoporosis. <i>Journal of Cellular Biochemistry 2018;119(6):4469-4481.</i>                                                                                                                                   | Systematic review and/or meta-analysis |
| 375. | Liu     | 2018<br>a | Liu, Y.; Cao, Y.; Zhang, S.; Zhang, W.; Zhang, B.; Tang, Q.; Li, Z.; Wu, J.. Romosozumab treatment in postmenopausal women with osteoporosis: a meta-analysis of randomized controlled trials. <i>Climacteric 2018;21(2):189-195.</i>                                                                                                                                                                                                 | Systematic review and/or meta-analysis |
| 376. | Lou     | 2016      | Lou, S.; Lv, H.; Wang, G.; Zhang, L.; Li, M.; Li, Z.; Zhang, L.; Tang, P.. The Effect of Teriparatide on Fracture Healing of Osteoporotic Patients: A Meta-Analysis of Randomized Controlled Trials. <i>BioMed Research International 2016;2016:6040379</i>                                                                                                                                                                           | Systematic review and/or meta-analysis |
| 377. | Lou     | 2019      | Lou, S.; Lv, H.; Yin, P.; Li, Z.; Tang, P.; Wang, Y.. Combination therapy with parathyroid hormone analogs and antiresorptive agents for osteoporosis: a systematic review and meta-analysis of randomized controlled trials. <i>Osteoporosis International 2019;30(1):59-70.</i>                                                                                                                                                     | Systematic review and/or meta-analysis |
| 378. | Lou     | 2019<br>a | Lou, S.; Lv, H.; Yin, P.; Li, Z.; Tang, P.; Wang, Y. Combination therapy with parathyroid hormone analogs and antiresorptive agents for osteoporosis: a systematic review and meta-analysis of randomized controlled trials. <i>Osteoporosis international : a journal established as result of cooperation between the European Foundation for Osteoporosis and the National Osteoporosis Foundation of the USA 2019;30(1):59-70</i> | Systematic review and/or meta-analysis |
| 379. | Lu      | 2019      | Lu, L.; Zhang, J.; Li, J.. Potential risks of rare serious adverse effects related to long-term use of bisphosphonates: An overview of systematic reviews. <i>Journal of Clinical Pharmacy and Therapeutics. 2019</i>                                                                                                                                                                                                                 | Systematic review and/or meta-analysis |

| No.  | Authors   | Year | Reference (extracted from covidence)                                                                                                                                                                                                                                                                                                                                                                                                                                                                                                                                                                     | Reasons for exclusion                  |
|------|-----------|------|----------------------------------------------------------------------------------------------------------------------------------------------------------------------------------------------------------------------------------------------------------------------------------------------------------------------------------------------------------------------------------------------------------------------------------------------------------------------------------------------------------------------------------------------------------------------------------------------------------|----------------------------------------|
| 380. | Lui       | 2019 | Lui, Li-Yung; Eastell, Richard; Cummings, Steven R.; Allen, Isabel E. Association between Drug Treatments for Patients with Osteoporosis and Overall Mortality Rates: A Meta-analysis. JAMA Internal Medicine 2019;179(11):1491-1500                                                                                                                                                                                                                                                                                                                                                                     | Systematic review and/or meta-analysis |
| 381. | Lundstam  | 2015 | Lundstam, K.; Heck, A.; Mollerup, C.; Godang, K.; Baranowski, M.; Pernow, Y.; Varhaug, J. E.; Hessman, O.; Rosen, T.; Nordenstrom, J.; Jansson, S.; Hellstrom, M.; Bollerslev, J.; Siph Study Group. Effects of parathyroidectomy versus observation on the development of vertebral fractures in mild primary hyperparathyroidism. Journal of Clinical Endocrinology & Metabolism 2015;100(4):1359-67.                                                                                                                                                                                                  | Wrong intervention                     |
| 382. | Lundstam  | 2014 | Lundstam, K.; Hellstrom, M.; Heck, A.; Godang, K.; Baranowski, M.; Varhaug, J. E.; Mollerup, C. L.; Rosen, T. P.; Nordenstrom, J.; Jansson, S.; et al., Increased risk for vertebral fractures with long-term observation in mild primary hyperparathyroidism: five year data from the scandinavian investigation of primary hyperparathyroidism (SIPH). Endocrine reviews. Conference: 96th annual meeting and expo of the endocrine society, ENDO 2014. Chicago, IL united states. Conference start: 20140621. Conference end: 20140624. Conference publication: (var.pagings) 2014;35(no pagination): | Conference abstract                    |
| 383. | Lv        | 2020 | Lv, Fang; Cai, Xiaoling; Yang, Wenjia; Gao, Leili; Chen, Ling; Wu, Jing; Ji, Linong. Denosumab or romosozumab therapy and risk of cardiovascular events in patients with primary osteoporosis: Systematic review and meta- analysis. Bone 2020;130():115121                                                                                                                                                                                                                                                                                                                                              | Systematic review and/or meta-analysis |
| 384. | Lyles     | 2007 | Lyles, K. W.; Colon-Emeric, C. S.; Magaziner, J. S.; Adachi, J. D.; Pieper, C. F.; Mautalen, C.; Hyldstrup, L.; Recknor, C.; Nordsletten, L.; Moore, K. A.; Lavecchia, C.; Zhang, J.; Mesenbrink, P.; Hodgson, P. K.; Abrams, K.; Orloff, J. J.; Horowitz, Z.; Eriksen, E. F.; Boonen, S.. Zoledronic acid and clinical fractures and mortality after hip fracture. New England Journal of Medicine 2007;357(18):1799-1809.                                                                                                                                                                              | Wrong patient population               |
| 385. | Lyu       | 2018 | Lyu, H.; Jundi, B.; Xu, C.; Tedeschi, S. K.; Yoshida, K.; Zhao, S.; Nigwekar, S. U.; Leder, B. Z.; Solomon, D. H.. Comparison of denosumab vs. bisphosphonates in osteoporosis patients: A meta-analysis of randomized controlled trials. Journal of Clinical Endocrinology & Metabolism 2018;10:10.                                                                                                                                                                                                                                                                                                     | Systematic review and/or meta-analysis |
| 386. | Magaziner | 2014 | Magaziner, J. S.; Orwig, D. L.; Lyles, K. W.; Nordsletten, L.; Boonen, S.; Adachi, J. D.; Recknor, C.; Colon-Emeric, C. S.; Mesenbrink, P.; Bucci-Rechtweg, C.; Su, G.; Johnson, R.; Pieper, C. F.. Subgroup variations in bone mineral density response to zoledronic acid after hip fracture.                                                                                                                                                                                                                                                                                                          | Wrong patient population               |



| No.  | Authors   | Year | Reference (extracted from covidence)                                                                                                                                                                                                                                                                                                                                                                                        | Reasons for exclusion                  |
|------|-----------|------|-----------------------------------------------------------------------------------------------------------------------------------------------------------------------------------------------------------------------------------------------------------------------------------------------------------------------------------------------------------------------------------------------------------------------------|----------------------------------------|
|      |           |      | Journal of Bone and Mineral Research 2014;29(12):2545-2551.                                                                                                                                                                                                                                                                                                                                                                 |                                        |
| 387. | Malhotra  | 2019 | Malhotra, R.; Chawla, L. Comparative study of weekly alendronate vs. yearly zoledronic acid injection treatment of postmenopausal osteoporosis in terms of efficacy, compliance and bone markers estimation. Osteoporosis International 2019;30(SUPPL 2):S724                                                                                                                                                               | Wrong outcomes                         |
| 388. | Malouf    | 2017 | Malouf, J.; Tarantino, U.; Aspenberg, P.; Overgaard, S.; Corradini, C.; Pini, G.; Stepan, J.; Borris, L.; Garcia-Hernandez, P.; Lespessailles, E.; et al.,. Effect of teriparatide or risedronate in bmd and fracture recovery in elderly patients with a recent pertrochanteric hip fracture: final results of a 78-week randomized clinical trial. Journal of Bone and Mineral Research 2017;31. [DOI: 10.1002/jbmr.3107] | Wrong patient population               |
| 389. | Mariscal  | 2020 | Mariscal, Gonzalo; Barrios, Carlos; Nunez, Jorge H.; Bhatia, Sanjay; Domenech-Fernandez, Pedro. Safety of Romosozumab in Osteoporotic Men and Postmenopausal Women: A Meta-Analysis and Systematic Review. Monoclonal antibodies in immunodiagnosis and immunotherapy 2020;39(2):29-36                                                                                                                                      | Systematic review and/or meta-analysis |
| 390. | Maughan   | 1997 | Maughan, K. L.. Preventing osteoporotic fractures with alendronate. The Journal of family practice Apr 1997;44(4):336                                                                                                                                                                                                                                                                                                       | Systematic review and/or meta-analysis |
| 391. | McCloskey | 2010 | McCloskey, E.; Johansson, H.; Chines, A.; Oden, A.; Kanis, J. Bazedoxifene reduces non-vertebral fractures in patients at high probability of fracture. Bone March 2010;1():S26                                                                                                                                                                                                                                             | Conference abstract                    |
| 392. | McCloskey | 2010 | McCloskey, E.; Kanis, J.; Johansson, H.; Oden, A. FRAX and the effect of raloxifene on vertebral and non-vertebral fracture. Osteoporosis International May 2010;1():S22                                                                                                                                                                                                                                                    | Conference abstract                    |
| 393. | McCloskey | 2016 | McCloskey, E. V.; Johansson, H.; Harvey, N. C.; Oden, A.; Jiang, H.; Modin, S.; Fitzpatrick, L.; Kanis, J. A.. Effect of investigational treatment abaloparatide-SC for prevention of major osteoporotic fracture or any fracture is independent of baseline fracture probability. Journal of Bone and Mineral Research. Conference 2016;31(Supplement 1)                                                                   | Conference abstract                    |
| 394. | McCloskey | 2017 | McCloskey, E.; Fitzpatrick, L. A.; Hu, M.; Kanis, J. A.. Abaloparatide-sc decreases vertebral, nonvertebral, major osteoporotic, and wrist fractures in a subset of postmeno-pausal women at high risk of fracture by frax score. Osteoporosis International 2017;28 (1 Supplement 1):S49-S50.                                                                                                                              | Conference abstract                    |
| 395. | McCloskey | 2019 | McCloskey, E. When and why use a bone-forming agent? Osteoporosis International 2019;30(SUPPL 2):S157                                                                                                                                                                                                                                                                                                                       | Conference abstract, with no new data  |

| No.  | Authors   | Year      | Reference (extracted from covidence)                                                                                                                                                                                                                                                                              | Reasons for exclusion                  |
|------|-----------|-----------|-------------------------------------------------------------------------------------------------------------------------------------------------------------------------------------------------------------------------------------------------------------------------------------------------------------------|----------------------------------------|
| 396. | McCloskey | 2019<br>a | McCloskey, E. V.; Eastell, R.; McClung, M.; Pannaciuoli, N.; Wang, C.; Yue, S.; Cummings, S. R. A pooled analysis of fall incidence from placebo-controlled trials of denosumab. <i>Osteoporosis International</i> 2019;30(SUPPL 2):S179-S180                                                                     | Conference abstract, with no new data  |
| 397. | McCloskey | 2019<br>b | McCloskey, E. V.; Lorentzon, M.; Johansson, H.; Harvey, N. C.; Kanis, J. A. Romosozumab efficacy on fracture outcomes is greater in patients at high baseline fracture risk: A post hoc analysis of the frame study. <i>Osteoporosis International</i> 2019;30(SUPPL 2):S163-S164                                 | Conference abstract, with no new data  |
| 398. | McCloskey | 2019<br>d | McCloskey, E. V.; Fitzpatrick, L. A.; Hu, M. Y.; Williams, G.; Kanis, J. A. Effect of abaloparatide on vertebral, nonvertebral, major osteoporotic, and clinical fractures in a subset of postmenopausal women at increased risk of fracture by FRAX probability. <i>Archives of osteoporosis</i> 2019;14(1):15   | Conference abstract                    |
| 399. | McClung   | 2003      | McClung, M.. Use of highly potent bisphosphonates in the treatment of osteoporosis. <i>Current Osteoporosis Reports</i> Dec 2003;1(3):116-122                                                                                                                                                                     | Systematic review and/or meta-analysis |
| 400. | McClung   | 2009      | McClung, M.; Bauer, D.; Christiansen, C.; Ebeling, P.; Grauer, A.; Lakatos, P.; Lems, W. The effects of denosumab on fracture risk reduction related to baseline bone resorption. <i>Arthritis and Rheumatism</i> 2009;10():593                                                                                   | Conference abstract                    |
| 401. | McClung   | 2009      | McClung, M.; Bone, H. G.; Adachi, J. D.; Boonen, S.; Christiansen, C.; Eastell, R.; Farrerons, J. Denosumab and risk of fractures in subgroups of women with osteoporosis. <i>Arthritis and Rheumatism</i> 2009;10():869                                                                                          | Conference abstract                    |
| 402. | McClung   | 2009      | McClung, M.; Cummings, S.; Yang, Y. C.; Vittinghoff, E.; Adami, S.; Bianchi, G.; Bolognese, M. Relationship between increases in BMD on denosumab and reduction in fracture risk. <i>Arthritis and Rheumatism</i> 2009;10():883                                                                                   | Conference abstract                    |
| 403. | McClung   | 2012      | McClung, M. R.; Miller, P. D.; Brown, J. P.; Zanchetta, J.; Bolognese, M. A.; Benhamou, C. L.; Balske, A.; Burgio, D. E.; Sarley, J.; McCullough, L. K.; Recker, R. R.. Efficacy and safety of a novel delayed-release risedronate 35 mg once-a-week tablet. <i>Osteoporosis International</i> 2012;23(1):267-76. | Wrong intervention                     |
| 404. | McClung   | 2013      | McClung, M. R.; Balske, A.; Burgio, D. E.; Wenderoth, D.; Recker, R. R.. Treatment of postmenopausal osteoporosis with delayed-release risedronate 35 mg weekly for 2 years. <i>Osteoporosis International</i> 2013;24(1):301-310.                                                                                | Wrong intervention                     |
| 405. | McClung   | 2013<br>a | McClung, M. R.; Benhamou, C. L.; Man, Z.; Tlustochowicz, W.; Zanchetta, J. R.; Eusebio, R.; Balske, A. M.; Matzkin, E.; Olszynski, W. P.; Recker, R.; Delmas, P. D.. A novel monthly dosing regimen of risedronate for the treatment of                                                                           | Wrong comparator                       |

| No.  | Authors | Year      | Reference (extracted from covidence)                                                                                                                                                                                                                                                                                                                                                                                                | Reasons for exclusion                 |
|------|---------|-----------|-------------------------------------------------------------------------------------------------------------------------------------------------------------------------------------------------------------------------------------------------------------------------------------------------------------------------------------------------------------------------------------------------------------------------------------|---------------------------------------|
|      |         |           | postmenopausal osteoporosis: 2-year data. <i>Calcified Tissue International</i> 2013;92(1):59-67                                                                                                                                                                                                                                                                                                                                    |                                       |
| 406. | McClung | 2013<br>b | McClung, M. R.; Zanchetta, J. R.; Racewicz, A.; Roux, C.; Benhamou, C. L.; Man, Z.; Eusebio, R. A.; Beary, J. F.; Burgio, D. E.; Matzkin, E.; Boonen, S.; Delmas, P.. Efficacy and safety of risedronate 150-mg once a month in the treatment of postmenopausal osteoporosis: 2-year data. <i>Osteoporosis International</i> 2013;24(1):293-9                                                                                       | Wrong comparator                      |
| 407. | McClung | 2013      | McClung, M. R.; Zanchetta, J. R.; Hoiseth, A.; Kendler, D. L.; Yuen, C. K.; Brown, J. P.; Stonkus, S.; Goemaere, S.; Recknor, C.; Woodson, G. C.; Bolognese, M. A.; Franek, E.; Brandi, M. L.; Wang, A.; Libanati, C. Denosumab densitometric changes assessed by quantitative computed tomography at the spine and hip in postmenopausal women with osteoporosis. <i>Journal of Clinical Densitometry</i> April 2013;16(2):250-256 | Wrong outcomes                        |
| 408. | McClung | 2017      | McClung, M. R.; Williams, G. C.; Hattersley, G.; Fitzpatrick, L. A.; Wang, Y.; Miller, P. D.. Comparison of the geography of fracture incidence in postmenopausal women with osteoporosis treated with abaloparatide-SC versus placebo during the ACTIVE trial. <i>Endocrine Reviews</i> . Conference: 99th Annual Meeting of the Endocrine Society, ENDO 2017;38(3 Supplement 1).                                                  | Conference abstract                   |
| 409. | McClung | 2017<br>a | McClung, M. R.; Bolognese, M. A.; Brown, J. P.; Reginster, J. Y.; Langdahl, B. L.; Maddox, J.; Yan, C.; Yue, S.; Meisner, P. D.; Grauer, A.. Transition to zoledronic acid after romosozumab treatment maintains bone mineral density gains. <i>Endocrine Reviews</i> . Conference: 99th Annual Meeting of the Endocrine Society, ENDO 2017;38(3 Supplement 1).                                                                     | Conference abstract                   |
| 410. | McClung | 2017<br>b | McClung, M.; Harvey, N. C.; Fitzpatrick, L. A.; Miller, P.; Hattersley, G.; Wang, Y.; Cosman, F.. Effects of abaloparatide-sc on bone mineral density and risk of fracture in postmenopausal women aged 80 years or older with osteoporosis. <i>Osteoporosis International</i> 2017;28 (Supplement 1):S407.                                                                                                                         | Conference abstract                   |
| 411. | McClung | 2020      | McClung, M. R.; Bolognese, M. A.; Brown, J. P.; Reginster, J. Y.; Langdahl, B. L.; Ruiz-Santiago, N.; Shi, Y.; Rojeski, M.; Kassahun, H.; Oates, M.; Timoshanko, J.; Libanati, C. Romosozumab after Denosumab Improves Lumbar Spine and Maintains Total Hip Bone Mineral Density in Postmenopausal Women with Low Bone Mass. <i>Journal of Bone and Mineral Research</i> 2020;35(SUPPL 1):246-247                                   | Conference abstract, with no new data |
| 412. | McClung | 2020<br>a | McClung, M. R.; Bolognese, M. A.; Brown, J. P.; Reginster, J. Y.; Langdahl, B. L.; Ruiz-Santiago, N.; Shi, Y.; Rojeski, M.; Oates, M.; Timoshanko, J.; Libanati, C.; Kassahun, H. Romosozumab after denosumab improves lumbar spine and maintains total hip bone mineral density in postmenopausal                                                                                                                                  | Conference abstract, with no new data |

| No.  | Authors         | Year      | Reference (extracted from covidence)                                                                                                                                                                                                                                                                                                                                                                                                          | Reasons for exclusion                  |
|------|-----------------|-----------|-----------------------------------------------------------------------------------------------------------------------------------------------------------------------------------------------------------------------------------------------------------------------------------------------------------------------------------------------------------------------------------------------------------------------------------------------|----------------------------------------|
|      |                 |           | womenwith low bone mass. Osteoporosis International 2020;31(SUPPL 1):S41-S42                                                                                                                                                                                                                                                                                                                                                                  |                                        |
| 413. | McClung         | 2020<br>b | McClung, Michael R.; Bolognese, Michael A.; Brown, Jacques P.; Reginster, Jean-Yves; Langdahl, Bente; Ruiz-Santiago, Norma; Shi, Yifei; Rojeski, Maria; Kassahun, Helina; Oates, Mary; Timoshanko, Jen; Libanati, Cesar. Romosozumab after Denosumab Improves Lumbar Spine and Maintains Total Hip Bone Mineral Density in Postmenopausal Women with Low Bone Mass. Arthritis and Rheumatology 2020;72(SUPPL 10):192-193                      | Conference abstract, with no new data  |
| 414. | Messalli        | 2009      | Messalli, E. M.; Scaffa, C.. Long-term safety and efficacy of raloxifene in the prevention and treatment of postmenopausal osteoporosis: An update. International Journal of Women's Health 2009;1(1):11-20                                                                                                                                                                                                                                   | Systematic review and/or meta-analysis |
| 415. | MichaelLewiecki | 2017      | Michael Lewiecki, E.; Dinavahi, R. V.; Lazaretti-Castro, M.; Ebeling, P. R.; Adachi, J. D.; Miyauchi, A.; Gielen, E.; Milmont, C. E.; Libanati, C.; Grauer, A. Continued fracture risk reduction after 12 months of romosozumab followed by denosumab through 36 months in the phase 3 FRAME (FRActure study in postmenopausal woMen with ostEoporosis) Extension. Journal of Bone and Mineral Research December 2017;32 (Supplement 1)():S24 | Extension study                        |
| 416. | Migliore        | 2013      | Migliore, A.; Broccoli, S.; Massafra, U.; Cassol, M.; Frediani, B.. Ranking antireabsorptive agents to prevent vertebral fractures in postmenopausal osteoporosis by mixed treatment comparison meta-analysis. European Review for Medical and Pharmacological Sciences 2013;17(5):658-667.                                                                                                                                                   | Systematic review and/or meta-analysis |
| 417. | Miller          | 2008      | Miller, P. D.; Bolognese, M. A.; Lewiecki, E. M.; McClung, M. R.; Ding, B.; Austin, M.; Liu, Y.; San Martin, J.. Effect of denosumab on bone density and turnover in postmenopausal women with low bone mass after long-term continued, discontinued, and restarting of therapy: A randomized blinded phase 2 clinical trial. Bone 2008;43(2):222-229.                                                                                        | Extension study                        |
| 418. | Miller          | 2010      | Miller, P. D.; Delmas, P. D.; Huss, H.; Patel, K. M.; Schimmer, R. C.; Adami, S.; Recker, R. R.. Increases in hip and spine bone mineral density are predictive for vertebral antifracture efficacy with ibandronate. Calcified Tissue International 2010;87(4):305-13                                                                                                                                                                        | Wrong study design                     |
| 419. | Miller          | 2015      | Miller, P. D.; Leder, B. Z.; Hattersley, G.; Lau, E.; Alexandersen, P.; Hala, T.; Mustatea, S.; Nedergaard, B. S.; Krogsaa, A.; Slesinger, J.; Zerbini, C. A. F.; Valter, I.; Visockiene, Z.; Jendrych, B.; Kulak, C. A.; Marquez, F.; Harris, A. G.; Williams, G. C.; Hu, M. Y.; Riis, B. J.; Russo, L. A.; Christiansen, C.. Effects of abaloparatide on vertebral and non-vertebral fracture incidence in postmenopausal                   | Conference abstract                    |

| No.  | Authors | Year      | Reference (extracted from covidence)                                                                                                                                                                                                                                                                                                                                                                                                                                                                                                                     | Reasons for exclusion |
|------|---------|-----------|----------------------------------------------------------------------------------------------------------------------------------------------------------------------------------------------------------------------------------------------------------------------------------------------------------------------------------------------------------------------------------------------------------------------------------------------------------------------------------------------------------------------------------------------------------|-----------------------|
|      |         |           | women with osteoporosis-results of the phase 3 active trial. Endocrine Reviews. Conference: 97th Annual Meeting and Expo of the Endocrine Society, ENDO 2015;36(Supplement 2).                                                                                                                                                                                                                                                                                                                                                                           |                       |
| 420. | Miller  | 2015<br>a | Miller, P. D.; Pannacciulli, N.; Brown, J. P.; Czerwinski, E.; Nedergaard, B. S.; Bolognese, M. A.; Malouf, J.; Bone, H. G.; Reginster, J. Y.; Singer, A.; Wang, C.; Wagman, R. B.; Cummings, S. R.. A randomized double-blind study of denosumab compared with zoledronic acid in postmenopausal women with osteoporosis previously treated with oral bisphosphonate. Arthritis and Rheumatology. Conference: American College of Rheumatology/Association of Rheumatology Health Professionals Annual Scientific Meeting, ACR/ARHP 2015;67(SUPPL. 10). | Conference abstract   |
| 421. | Miller  | 2016      | Miller, P.; Pannacciulli, N.; Brown, J. P.; Czerwinski, E.; Nedergaard, B. S.; Bolognese, M. A.; Malouf, J.; Bone, H. G.; Reginster, J. Y.; Singer, A.; Wang, C.; Wagman, R. B.; Cummings, S. R.. A randomized double-blind study of denosumab (DMAB) compared with zoledronic acid (ZOL) in postmenopausal women with osteoporosis previously treated with oral bisphosphonates. Osteoporosis International 2016;1):S41.                                                                                                                                | Conference abstract   |
| 422. | Miller  | 2017      | Miller, P. D.; Pannacciulli, N.; Malouf, J.; Singer, A.; Czerwinski, E.; Bone, H. G.; Wang, C.; Wagman, R. B.; Brown, J. P.. A meta-analysis of 4 clinical trials of denosumab compared with bisphosphonates in postmenopausal women previously treated with oral bisphosphonates. Arthritis and Rheumatology. Conference: American College of Rheumatology/Association of Rheumatology Health Professionals Annual Scientific Meeting, ACR/ARHP 2017;69(Supplement 10).                                                                                 | Conference abstract   |
| 423. | Miller  | 2017<br>a | Miller, P.; Pannacciulli, N.; Malouf-Sierra, J.; Singer, A.; Czerwinski, E.; Bone, H. G.; Wang, C.; Wagman, R. B.; Brown, J. P.. A meta-analysis of 4 clinical trials of denosumab compared with bisphosphonates in postmenopausal women previously treated with oral bisphosphonates. Journal of Bone and Mineral Research December 2017;32 (Supplement 1):S271                                                                                                                                                                                         | Conference abstract   |
| 424. | Miller  | 2018      | Miller, P. D.; Pannacciulli, N.; Malouf, J.; Singer, A.; Czerwinski, E.; Bone, H. G.; Wang, C.; Wagman, R. B.; Brown, J. P.. A meta-analysis of 4 clinical trials of denosumab (DMAB) compared with bisphosphonates (BPS) in postmenopausal women previously treated with oral bisphosphonates (OBPS). Osteoporosis International 2018;29 (1 Supplement 1):S55-S56.                                                                                                                                                                                      | Conference abstract   |
| 425. | Miller  | 2019      | Miller, P. D.; Hattersley, G.; Fitzpatrick, L. A.; Williams, G. C.; Hu, M. Y.; Lau, E.; Harris, A. G.; Riis, B. J.; Christiansen, C.; Russo, L. Bone mineral                                                                                                                                                                                                                                                                                                                                                                                             | Wrong outcomes        |

| No.  | Authors  | Year | Reference (extracted from covidence)                                                                                                                                                                                                                                                                                                                                                                                                                                                       | Reasons for exclusion                  |
|------|----------|------|--------------------------------------------------------------------------------------------------------------------------------------------------------------------------------------------------------------------------------------------------------------------------------------------------------------------------------------------------------------------------------------------------------------------------------------------------------------------------------------------|----------------------------------------|
|      |          |      | density response rates are greater in patients treated with abaloparatide compared with those treated with placebo or teriparatide: Results from the ACTIVE phase 3 trial. <i>Bone</i> 2019;120():137-140                                                                                                                                                                                                                                                                                  |                                        |
| 426. | Miller   | 2020 | Miller, P. D.; Pannacciulli, N.; Malouf-Sierra, J.; Singer, A.; Czerwinski, E.; Bone, H. G.; Wang, C.; Huang, S.; Chines, A.; Lems, W.; Brown, J. P. Efficacy and safety of denosumab vs. bisphosphonates in postmenopausal women previously treated with oral bisphosphonates. <i>Osteoporosis international : a journal established as result of cooperation between the European Foundation for Osteoporosis and the National Osteoporosis Foundation of the USA</i> 2020;31(1):181-191 | Wrong outcomes                         |
| 427. | Mirkin   | 2013 | Mirkin, S.; Komm, B. S.; Pan, K.; Chines, A. A.. Effects of bazedoxifene/conjugated estrogens on endometrial safety and bone in postmenopausal women. <i>Climacteric</i> 2013;16(3):338-346.                                                                                                                                                                                                                                                                                               | Wrong outcomes                         |
| 428. | Mockel   | 2020 | Mockel, Luis; Bartneck, Matthias; Mockel, Christina. Risk of falls in postmenopausal women treated with romosozumab: Preliminary indices from a meta-analysis of randomized, controlled trials. <i>Osteoporosis and Sarcopenia</i> 2020;6(1):20-26                                                                                                                                                                                                                                         | Wrong outcomes                         |
| 429. | Morales  | 2018 | Morales, C. C.; Canizares, H. G.. Teriparatide use among postmenopausal women: A meta-analysis. <i>Osteoporosis International</i> 2018;29 (1 Supplement 1):S436.                                                                                                                                                                                                                                                                                                                           | Systematic review and/or meta-analysis |
| 430. | Murad    | 2012 | Murad, M. H.; Drake, M. T.; Mullan, R. J.; Mauck, K. F.; Stuart, L. M.; Lane, M. A.; Abu Elnour, N. O.; Erwin, P. J.; Hazem, A.; Puhan, M. A.; Li, T.; Montori, V. M.. Clinical review. Comparative effectiveness of drug treatments to prevent fragility fractures: a systematic review and network meta-analysis. <i>The Journal of clinical endocrinology and metabolism</i> 2012;97(6):1871-1880.                                                                                      | Systematic review and/or meta-analysis |
| 431. | Murphy   | 2001 | Murphy, M. G.; Weiss, S.; McClung, M.; Schnitzer, T.; Cerchio, K.; Connor, J.; Krupa, D.; Gertz, B. J.. Effect of alendronate and MK-677 (a growth hormone secretagogue), individually and in combination, on markers of bone turnover and bone mineral density in postmenopausal osteoporotic women. <i>Journal of Clinical Endocrinology and Metabolism</i> 2001;86(3):1116-1125.                                                                                                        | Wrong intervention                     |
| 432. | Muschitz | 2012 | Muschitz, C.; Fahrleitner-Pammer, A.; Kocijan, R.; Bittighofer, C.; Trubrich, A.; Kuehne, F.; Waneck, R.; Resch, H. Teriparatide and antiresorptive combination treatment subsequent to 9 months of teriparatide monotherapy. <i>Osteoporosis International</i> March 2012;22():S106-S107                                                                                                                                                                                                  | Conference abstract                    |

| No.  | Authors  | Year | Reference (extracted from covidence)                                                                                                                                                                                                                                                                                                                                        | Reasons for exclusion                  |
|------|----------|------|-----------------------------------------------------------------------------------------------------------------------------------------------------------------------------------------------------------------------------------------------------------------------------------------------------------------------------------------------------------------------------|----------------------------------------|
| 433. | Muschitz | 2013 | Muschitz, C.; Kocijan, R.; Fahrleitner-Pammer, A.; Lung, S.; Resch, H.. Antiresorptives overlapping ongoing teriparatide treatment result in additional increases in bone mineral density. <i>Journal of Bone and Mineral Research</i> January 2013;28(1):196-205                                                                                                           | Wrong study design                     |
| 434. | Muschitz | 2013 | Muschitz, C.; Kocijan, R.; Schima, W.; Haschka, J.; Zendeli, A.; Fahrleitner-Pammer, A.; Resch, H. Overlapping and follow-up of alendronate to teriparatide results in continuing volumetric bone mass increase measured by quantitative computed tomography. <i>Journal of Bone and Mineral Research</i> . Conference 2013;28(SUPPL. 1):                                   | Conference abstract                    |
| 435. | Nagahama | 2011 | Nagahama, K.; Kanayama, M.; Togawa, D.; Hashimoto, T.; Minami, A.. Does alendronate disturb the healing process of posterior lumbar interbody fusion? A prospective randomized trial. <i>Journal of Neurosurgery: Spine</i> 2011;14(4):500-507.                                                                                                                             | Wrong patient population               |
| 436. | Nakamura | 2012 | Nakamura, T.; Tsujimoto, M.; Hamaya, E.; Sowa, H.; Chen, P.. Consistency of fracture risk reduction in Japanese and Caucasian osteoporosis patients treated with teriparatide: A meta-analysis. <i>Journal of Bone and Mineral Metabolism</i> 2012;30(3):321-325.                                                                                                           | Systematic review and/or meta-analysis |
| 437. | Narula   | 2012 | Narula, R.; Mujtaba, T.; Iraqi, A. A.; Singh, S.. Effect of risedronate and strontium therapy on bone mineral density in postmenopausal osteoporosis. <i>International Journal of Research in Ayurveda and Pharmacy</i> July/August 2012;3(4):543-547                                                                                                                       | Wrong outcomes                         |
| 438. | Nevitt   | 2010 | Nevitt, M. C.; Silverman, S. L.; Viswanathan, H.; Yang, Y. C.; Wang, A.; Boonen, S.; Ragi-Eis, S. Impact of incident clinical vertebral fractures on back pain outcomes in postmenopausal women who participated in the FREEDOM trial. <i>Arthritis and Rheumatism</i> 2010;10():971                                                                                        | Conference abstract                    |
| 439. | Nuti     | 2014 | Nuti, R.. Updates on mechanism of action and clinical efficacy of risedronate in osteoporosis. <i>Clinical Cases in Mineral and Bone Metabolism</i> 01 Sep 2014;11(3):208-214                                                                                                                                                                                               | Systematic review and/or meta-analysis |
| 440. | Oglesby  | 2003 | Oglesby, A. K.; Minshall, M. E.; Shen, W.; Xie, S.; Silverman, S. L.. The impact of incident vertebral and non-vertebral fragility fractures on health-related quality of life in established postmenopausal osteoporosis: Results from the teriparatide randomized, placebo-controlled trial in postmenopausal women. <i>Journal of Rheumatology</i> 2003;30(7):1579-1583. | Wrong study design                     |
| 441. | Oswald   | 2019 | Oswald, A. J.; Berg, K.; Ralston, S. H.; Riches, P. L.. Long-Term Effects of Teriparatide Followed by Antiresorptive Therapy on Clinical Outcomes in Patients with Severe Spinal Osteoporosis. <i>Calcified Tissue International</i> 15 Aug 2019;105(2):148-155                                                                                                             | Wrong study design                     |

| No.  | Authors      | Year | Reference (extracted from covidence)                                                                                                                                                                                                                                                                                                                                                                                                                                           | Reasons for exclusion                  |
|------|--------------|------|--------------------------------------------------------------------------------------------------------------------------------------------------------------------------------------------------------------------------------------------------------------------------------------------------------------------------------------------------------------------------------------------------------------------------------------------------------------------------------|----------------------------------------|
| 442. | Paggiosi     | 2019 | Paggiosi, M. A.; McCloskey, E. V.; Walsh, J. S.; Eastell, R.; Peel, N. F. A. Comparison of treatment responder rates for three oral bisphosphonates: The TRIO study. <i>JBMR Plus</i> 2019;3(Supplement 3):54-55                                                                                                                                                                                                                                                               | Conference abstract, with no new data  |
| 443. | Paggiosi     | 2020 | Paggiosi, Margaret A.; McCloskey, Eugene; Walsh, Jennifer S.; Eastell, Richard; Peel, Nicola. Comparison of treatment responder rates for three oral bisphosphonates: The TRIO study. <i>Bone Reports</i> 2020;13(Supplement):100677                                                                                                                                                                                                                                           | Conference abstract, with no new data  |
| 444. | Palacios     | 2013 | Palacios, S.; Rizzoli, R.; Zapalowski, C.; Resch, H.; Adami, S.; Adachi, J. D.; Gallagher, J. C.; Feldman, R. G.; Kendler, D. L.; El-Haschimi, K.; Wang, A.; Wagman, R. B.; Boonen, S. Denosumab reduced osteoporotic fractures in postmenopausal women with osteoporosis with prior fracture: Results from freedom. <i>Osteoporosis International</i> April 2013;1():S299-S300                                                                                                | Conference abstract                    |
| 445. | Palacios     | 2015 | Palacios, S.; Silverman, S. L.; De Villiers, T. J.; Levine, A. B.; Goemaere, S.; Brown, J. P.; De Cicco Nardone, F.; Williams, R.; Hines, T. L.; Mirkin, S.; Chines, A. A. A 7-year randomized, placebo-controlled trial assessing the long-term efficacy and safety of bazedoxifene in postmenopausal women with osteoporosis: Effects on bone density and fracture. <i>Menopause</i> 2015;22(8):806-813.                                                                     | Extension study                        |
| 446. | Palacios     | 2020 | Palacios, S. An assessment of cardiovascular safety with HRT and SERMS. <i>Osteoporosis International</i> 2020;31(SUPPL 1):S63-S64                                                                                                                                                                                                                                                                                                                                             | Wrong outcomes                         |
| 447. | Pannecciulli | 2015 | Pannacciulli, N.; Czerwinski, E.; Nedergaard, B. S.; Malouf, J.; Bone, H. G.; Reginster, J. Y.; Wang, C.; Wagman, R. B.; Cummings, S. R.. Denosumab compared with zoledronic acid in postmenopausal women with osteoporosis previously treated with oral bisphosphonates: Efficacy and safety results from a randomized double-blind study. <i>Journal of Bone and Mineral Research</i> . Conference 2015;30(Supplement 1).                                                    | Conference abstract                    |
| 448. | Papaioannou  | 2010 | Papaioannou, A.; Marr, S.; Ioannidis, G.; Kennedy, C.; Giangregorio, L.; Pickard, L.; Johnson, J.; Campbell, G.; Stroud, J.; Morin, S.; Josse, R.; Sawka, A.; Crilly, R.; Thabane, L.; Dolovich, L.; Van Der Horst, M. L.; Flett, N.; Nash, L.; Adachi, J.. Bisphosphonate use in women and men who are at high risk for new fractures and living in long-term care homes: The vitamin D osteoporosis study (ViDOS). <i>Journal of Bone and Mineral Research</i> 2010;1):S206. | Conference abstract                    |
| 449. | Papapoulos   | 2010 | Papapoulos, S. E. New evidence in the treatment of osteoporosis with Denosumab. <i>Osteoporosis International</i> May 2010;1():S396                                                                                                                                                                                                                                                                                                                                            | Conference abstract                    |
| 450. | Papapoulos   | 2005 | Papapoulos, S. E.; Quandt, S. A.; Liberman, U. A.; Hochberg, M. C.; Thompson, D. E.. Meta-analysis of                                                                                                                                                                                                                                                                                                                                                                          | Systematic review and/or meta-analysis |



| No.  | Authors    | Year      | Reference (extracted from covidence)                                                                                                                                                                                                                                                                                                                                                                                                                                                                                                                                                                                                                                                                                                                                                                                                                                                                                                                             | Reasons for exclusion                  |
|------|------------|-----------|------------------------------------------------------------------------------------------------------------------------------------------------------------------------------------------------------------------------------------------------------------------------------------------------------------------------------------------------------------------------------------------------------------------------------------------------------------------------------------------------------------------------------------------------------------------------------------------------------------------------------------------------------------------------------------------------------------------------------------------------------------------------------------------------------------------------------------------------------------------------------------------------------------------------------------------------------------------|----------------------------------------|
|      |            |           | the efficacy of alendronate for the prevention of hip fractures in postmenopausal women. Osteoporosis international : a journal established as result of cooperation between the European Foundation for Osteoporosis and the National Osteoporosis Foundation of the USA 2005;16(5):468-474.                                                                                                                                                                                                                                                                                                                                                                                                                                                                                                                                                                                                                                                                    |                                        |
| 451. | Papapoulos | 2011      | Papapoulos, S. E.. Use of bisphosphonates in the management of postmenopausal osteoporosis. Annals of the New York Academy of Sciences 2011;1218:15-32                                                                                                                                                                                                                                                                                                                                                                                                                                                                                                                                                                                                                                                                                                                                                                                                           | Systematic review and/or meta-analysis |
| 452. | Park       | 2021      | Park, C. W.; Lim, S. J.; Moon, Y. W.; Park, Y. S.; Choi, S. H.; Shin, M. H.; Min, Y. K.; Yoon, B. K. Fracture recurrence in hip fracture with menopausal hormone therapy versus risedronate: a clinical trial. Climacteric 2021;24(4):408-414                                                                                                                                                                                                                                                                                                                                                                                                                                                                                                                                                                                                                                                                                                                    | Wrong comparator                       |
| 453. | Pazan      | 2021      | Pazan, Farhad; Wehling, Martin; Petrovic, Mirko; Cherubini, Antonio; Onder, Graziano; Cruz-Jentoft, Alfonso J.; Denking, Michael; van der Cammen, Tischa J. M.; Stevenson, Jennifer M.; Ibrahim, Kinda; Rajkumar, Chakravarthi; Bakken, Marit Stordal; Baeyens, Jean-Pierre; Crome, Peter; Fruhwald, Thomas; Gallagher, Paul; Gumundsson, Adalsteinn; Knol, Wilma; O'Mahony, Denis; Pilotto, Alberto; Ronnema, Elina; Serra-Rexach, Jose Antonio; Soulis, George; van Marum, Rob J.; Zieler, Gijbertus; Mair, Alpana; Burkhardt, Heinrich; Neumann-Podczaska, Agnieszka; Wieczorowska-Tobis, Katarzyna; Fernandes, Marilia Andreia; Gruner, Heidi; Dallmeier, Dhayana; Beuscart, Jean-Baptiste; van der Velde, Nathalie. Current evidence on the impact of medication optimization or pharmacological interventions on frailty or aspects of frailty: a systematic review of randomized controlled trials. European Journal of Clinical Pharmacology 2021;77(1): | Wrong outcomes                         |
| 454. | Peng       | 2016      | Peng, J.; Liu, Y.; Chen, L.; Peng, K.; Xu, Z.; Zhang, D.; Xiang, Z.. Bisphosphonates can prevent recurrent hip fracture and reduce the mortality in osteoporotic patient with hip fracture: A meta-analysis. Pakistan Journal of Medical Sciences 2016;32(2):499-504.                                                                                                                                                                                                                                                                                                                                                                                                                                                                                                                                                                                                                                                                                            | Systematic review and/or meta-analysis |
| 455. | Peng       | 2017      | Peng, L.; Luo, Q.; Lu, H.. Efficacy and safety of bazedoxifene in postmenopausal women with osteoporosis: A systematic review and meta-analysis. Medicine (United States) 2017;96 (49) (no pagination)(e8659).                                                                                                                                                                                                                                                                                                                                                                                                                                                                                                                                                                                                                                                                                                                                                   | Systematic review and/or meta-analysis |
| 456. | Peng       | 2017<br>a | Peng, L.; Luo, Q.; Lu, H.. Efficacy and safety of bazedoxifene in postmenopausal women with osteoporosis: A systematic review and meta-analysis. Medicine 2017;96(49):e8659                                                                                                                                                                                                                                                                                                                                                                                                                                                                                                                                                                                                                                                                                                                                                                                      | Systematic review and/or meta-analysis |
| 457. | Pilipovic  | 2006      | Pilipovic, N.; Brankovic, S.; Vujasinovic-Stupar, N.. Effects of Alendronate on bone mass in women                                                                                                                                                                                                                                                                                                                                                                                                                                                                                                                                                                                                                                                                                                                                                                                                                                                               | Systematic review and/or meta-analysis |

| No.  | Authors         | Year | Reference (extracted from covidence)                                                                                                                                                                                                                                                                                                                                                                               | Reasons for exclusion                         |
|------|-----------------|------|--------------------------------------------------------------------------------------------------------------------------------------------------------------------------------------------------------------------------------------------------------------------------------------------------------------------------------------------------------------------------------------------------------------------|-----------------------------------------------|
|      |                 |      | with osteoporosis. <i>Medicinski Pregled</i> 2006;59(9-10):427-35                                                                                                                                                                                                                                                                                                                                                  |                                               |
| 458. | Pinkerton       | 2014 | Pinkerton, J. V.; Harvey, J. A.; Lindsay, R.; Pan, K.; Chines, A. A.; Mirkin, S.; Archer, D. F.. Effects of bazedoxifene/conjugated estrogens on the endometrium and bone: A randomized trial. <i>Journal of Clinical Endocrinology and Metabolism</i> 2014;99(2):E189-E198.                                                                                                                                       | Wrong outcomes                                |
| 459. | Poole           | 2006 | Poole, K. E. S.; Compston, J. E.. Osteoporosis and its management. <i>British Medical Journal</i> 16 Dec 2006;333(7581):1251-1256                                                                                                                                                                                                                                                                                  | Systematic review and/or meta-analysis        |
| 460. | Poole           | 2019 | Poole, K. E. S.; Treece, G. M.; Gee, A. H.; Whitmarsh, T.; Pearson, R. A.; Bolognese, M. A.; Brown, J. P.; Goemaere, S.; Grauer, A.; Yang, Y. C.; Hanley, D. A.; Mautalen, C.; Recknor, C.; Libanati, C. Romosozumab enhances 3d vertebral structure in women with low bone density: mapping bone gains at one year compared with teriparatide or placebo. <i>Osteoporosis International</i> 2019;30(SUPPL 2):S164 | Conference abstract, with no new data         |
| 461. | Popp            | 2013 | Popp, A. W.; Guler, S.; Lamy, O.; Senn, C.; Buffat, H.; Perrelet, R.; Hans, D.; Lippuner, K.. Effects of zoledronate versus placebo on spine bone mineral density and microarchitecture assessed by the trabecular bone score in postmenopausal women with osteoporosis: A three-year study. <i>Journal of Bone and Mineral Research</i> 2013;28(3):449-454.                                                       | Wrong outcomes                                |
| 462. | Prestwood       | 2000 | Prestwood, K. M.; Raisz, L. G.. Prevention and treatment of osteoporosis. <i>Clinical cornerstone</i> 2000;2(6):34-44                                                                                                                                                                                                                                                                                              | Systematic review and/or meta-analysis        |
| 463. | Prieto-Alhambra | 2014 | Prieto-Alhambra, D.; Judge, A.; Arden, N. K.; Cooper, C.; Lyles, K. W.; Javaid, M. K.. Fracture prevention in patients with cognitive impairment presenting with a hip fracture: Secondary analysis of data from the HORIZON Recurrent Fracture Trial. <i>Osteoporosis International</i> 2014;25(1):77-83.                                                                                                         | Wrong patient population (sub group analysis) |
| 464. | Purdie          | 2003 | Purdie, D. W.; Rees, M.. Parathyroid hormone in osteoporosis. <i>Journal of the British Menopause Society</i> 2003;9(4):175                                                                                                                                                                                                                                                                                        | Commentary                                    |
| 465. | Qureshi         | 2020 | Qureshi, Abdul Rehman; El-Khechen, Hussein Ali; Akhter, Shakib; Bozzo, Anthony; Khan, Moin; Bhandari, Mohit; Patel, Rakesh; Aleem, Ilyas. The efficacy of teriparatide on lumbar spine bone mineral density, vertebral fracture incidence and pain in post-menopausal osteoporotic patients: A systematic review and meta-analysis. <i>Bone Reports</i> 2020;13():100728                                           | Systematic review and/or meta-analysis        |
| 466. | Rackoff         | 2009 | Rackoff, P.. Efficacy and safety of risedronate 150 mg once a month in the treatment of postmenopausal osteoporosis. <i>Clinical Interventions In Aging</i> 2009;4:207-214                                                                                                                                                                                                                                         | Systematic review and/or meta-analysis        |
| 467. | Ralston         | 2011 | Ralston, S. H.; Binkley, N.; Boonen, S.; Kiel, D. P.; Reginster, J. Y.; Roux, C.; Chen, L.; Rosenberg, E.; Santora, A.; Coughlan, T.; Arabi, A.; Kucukdeveci,                                                                                                                                                                                                                                                      | Wrong patient population                      |

| No.  | Authors   | Year | Reference (extracted from covidence)                                                                                                                                                                                                                                                                                                                                                                                                                                                                                                                                                                                                                                                                                                                                                                                                                                                                                                                                                                                                                                                                                                                                           | Reasons for exclusion                 |
|------|-----------|------|--------------------------------------------------------------------------------------------------------------------------------------------------------------------------------------------------------------------------------------------------------------------------------------------------------------------------------------------------------------------------------------------------------------------------------------------------------------------------------------------------------------------------------------------------------------------------------------------------------------------------------------------------------------------------------------------------------------------------------------------------------------------------------------------------------------------------------------------------------------------------------------------------------------------------------------------------------------------------------------------------------------------------------------------------------------------------------------------------------------------------------------------------------------------------------|---------------------------------------|
|      |           |      | A.; Savani, N.; Kausiene, R.; Pornel, B.; Price, T.; Benhamou, C. L.; Aguilar, M.; Abello, M.; Tobias, E.; Rais, N.; Ershova, O.; Martz, R.; Linjawi, S.; Kramer, S.; Walliser, J.; Hepguler, S.; Gimble, J.; Lesnyak, O.; Chalem, P.; Aramburu, J.; Foldes, J.; Yaghi, Y.; Abud, C.; Munoz Torres, M.; Gonzalez, G.; Weryha, G.; Mola, E. M.; Shargordsky, M.; Lippuner, K.; Moericke, R.; Masri, B.; Stura, I.; Theiler, R.; Dursun, N.; Thompson, V.; Andersone, D.; Arya, M.; Anderberg, C. P.; Pfeifer, M.; Goldstraj, H.; Alekna, V.; Wieskopf, B.; De Villiers, T.; Minisola, S.; Heil, K.; Herkt, V.; Rohlf, J.; De Weerd, A.; Ish-Shalom, S.; Bukauskiene, L.; Benevolenskaya, L.; Mantilla, R.; Woolf, A.; Otero, W.; Nayiager, S.; Walsh, B.; Newman, S.; Bagul, N.; Abdulhakim, E.; Govindraj, S.; Sarmiento, R.; Ellahbadi, R.; Shaw, H.; Thomas, H.; Lipschitz, S.; Gutierrez, S.; Ralston, S.; Davey, M.; Lauro, R.; Rodriguez, H.; Al-Ramahi, M.. Randomized trial of alendronate plus vitamin D<sup>3</sup> versus standard care in osteoporotic postmenopausal women with vitamin D insufficiency. <i>Calcified Tissue International</i> 2011;88(6):485-494. |                                       |
| 468. | Ramchand  | 2019 | Ramchand, S. K.; David, N. L.; Leder, B. Z.; Tsai, J. N.. Bone mineral density response with denosumab in combination with standard or high-dose teriparatide: the DATA-HD RCT. <i>The Journal of clinical endocrinology and metabolism</i> . 2019;01                                                                                                                                                                                                                                                                                                                                                                                                                                                                                                                                                                                                                                                                                                                                                                                                                                                                                                                          | Wrong outcomes                        |
| 469. | Ramchand  | 2019 | Ramchand, Sabashini K.; Tsai, Joy N.; David, Natalie L.; Leder, Benjamin Z.; Lee, Hang; Eastell, Richard. Bone balance in postmenopausal women treated with combined high-dose teriparatide and denosumab: The DATA-HD randomized controlled trial. <i>Journal of Bone and Mineral Research</i> 2019;34(Supplement 1):103                                                                                                                                                                                                                                                                                                                                                                                                                                                                                                                                                                                                                                                                                                                                                                                                                                                      | Conference abstract, with no new data |
| 470. | Reginster | 2001 | Reginster, J. Y.. Risedronate increases bone mineral density and reduces the vertebral fracture incidence in postmenopausal women. <i>Clinical and Experimental Rheumatology</i> 2001 2001;19(2):121-122                                                                                                                                                                                                                                                                                                                                                                                                                                                                                                                                                                                                                                                                                                                                                                                                                                                                                                                                                                       | Commentary                            |
| 471. | Reginster | 2004 | Reginster, J. Y.; Sarkar, S.; Zegels, B.; Henrotin, Y.; Bruyere, O.; Agnusdei, D.; Collette, J.. Reduction in PINP, a marker of bone metabolism, with raloxifene treatment and its relationship with vertebral fracture risk. <i>Bone</i> 2004;34(2):344-351.                                                                                                                                                                                                                                                                                                                                                                                                                                                                                                                                                                                                                                                                                                                                                                                                                                                                                                                  | Wrong study design                    |
| 472. | Reginster | 2005 | Reginster, J. Y.. Treatment of postmenopausal osteoporosis. <i>British Medical Journal</i> 16 Apr 2005;330(7496):859-860                                                                                                                                                                                                                                                                                                                                                                                                                                                                                                                                                                                                                                                                                                                                                                                                                                                                                                                                                                                                                                                       | Commentary                            |
| 473. | Reginster | 2010 | Reginster, J. Y.; McClung, M.; Cox, D.; Mitlak, B.; Stock, J.; Amewou-Atisso, M.; Miller, P.; Christiansen, C.; Cummings, S. Effects of arzoxifene on fracture incidence in postmenopausal women                                                                                                                                                                                                                                                                                                                                                                                                                                                                                                                                                                                                                                                                                                                                                                                                                                                                                                                                                                               | Wrong intervention                    |

| No.  | Authors   | Year      | Reference (extracted from covidence)                                                                                                                                                                                                                                                                                                                                                                                                           | Reasons for exclusion                  |
|------|-----------|-----------|------------------------------------------------------------------------------------------------------------------------------------------------------------------------------------------------------------------------------------------------------------------------------------------------------------------------------------------------------------------------------------------------------------------------------------------------|----------------------------------------|
|      |           |           | with osteoporosis or with low bone mass. Osteoporosis International May 2010;1():S23-S24                                                                                                                                                                                                                                                                                                                                                       |                                        |
| 474. | Reginster | 2017      | Reginster, J.; Bianic, F.; Campbell, R.; Martin, M.; Williams, S.; Fitzpatrick, L.. Abaloparatide for risk reduction of nonvertebral and vertebral fractures in postmenopausal women with osteoporosis: A network meta-analysis. Value in Health 2017;20 (9):A527.                                                                                                                                                                             | Systematic review and/or meta-analysis |
| 475. | Reginster | 2018      | Reginster, J. Y.; Bianic, F.; Campbell, R.; Martin, M.; Williams, S. A.; Fitzpatrick, L. A.. Abaloparatide for risk reduction of nonvertebral and vertebral fractures in postmenopausal women with osteoporosis: A network meta-analysis. Arthritis and Rheumatology 2018;70 (Supplement 9):2552-2553.                                                                                                                                         | Systematic review and/or meta-analysis |
| 476. | Reginster | 2018<br>b | Reginster, J.; Bianic, F.; Campbell, R.; Martin, M.; Williams, S.; Fitzpatrick, L.. Abaloparatide for risk reduction of nonvertebral and vertebral fractures in postmenopausal women with osteoporosis: A network meta-analysis. Journal of Managed Care and Specialty Pharmacy October 2018;24 (10 A):S84-S85                                                                                                                                 | Conference abstract                    |
| 477. | Reginster | 2018c     | Reginster, J. Y.; Al Daghri, N.; Kaufman, J. M.; Bruyere, O.. Effect of a sequential treatment combining abaloparatide and alendronate for the management of postmenopausal osteoporosis. Expert Opinion on Pharmacotherapy 2018;19(2):159-161.                                                                                                                                                                                                | Commentary                             |
| 478. | Reginster | 2019      | Reginster, J. Y.; Bianic, F.; Campbell, R.; Martin, M.; Williams, S. A.; Fitzpatrick, L. A.. Abaloparatide for risk reduction of nonvertebral and vertebral fractures in postmenopausal women with osteoporosis: a network meta-analysis. Osteoporosis International 01 Jul 2019;30(7):1465-1473                                                                                                                                               | Systematic review and/or meta-analysis |
| 479. | Reginster | 2019<br>a | Reginster, J. Y.; Bianic, F.; Campbell, R.; Martin, M.; Williams, S. A.; Fitzpatrick, L. A. Abaloparatide for risk reduction of nonvertebral and vertebral fractures in postmenopausal women with osteoporosis: a network meta-analysis. Osteoporosis international : a journal established as result of cooperation between the European Foundation for Osteoporosis and the National Osteoporosis Foundation of the USA 2019;30(7):1465-1473 | Systematic review and/or meta-analysis |
| 480. | Reid      | 2002      | Reid, I. R.. Osteoporosis: Non-HRT treatments. Reviews in Gynaecological Practice 2002;2(1-2):48-53                                                                                                                                                                                                                                                                                                                                            | Systematic review and/or meta-analysis |
| 481. | Reid      | 2009      | Reid, I. Rank ligand inhibition in patients with postmenopausal bone loss. Bone May 2009;1():S41                                                                                                                                                                                                                                                                                                                                               | Wrong outcomes                         |
| 482. | Reid      | 2009      | Reid, I.; Boonen, S.; Black, D. M.; Colon-Emeric, C.; Eastell, R.; Magaziner, J.; Mesenbrink, P.; Eriksen, E.                                                                                                                                                                                                                                                                                                                                  | Conference abstract                    |

| No.  | Authors  | Year      | Reference (extracted from covidence)                                                                                                                                                                                                                                                                                                                                          | Reasons for exclusion                                     |
|------|----------|-----------|-------------------------------------------------------------------------------------------------------------------------------------------------------------------------------------------------------------------------------------------------------------------------------------------------------------------------------------------------------------------------------|-----------------------------------------------------------|
|      |          |           | F.; Lyles, K. W. Once-yearly treatment with zoledronic acid continues to be effective in old age. <i>Bone</i> May 2009;11():S94                                                                                                                                                                                                                                               |                                                           |
| 483. | Reid     | 2010      | Reid, I.; Miller, P.; Brown, J. P.; Kendler, D.; Fahrleitner-Pammer, A.; Valter, I.; Maasalu, K.; Bolognese, M.; Woodson, G.; Bone, H. G.; Ding, B.; Wagman, R. B.; San Martin, J.; Ominsky, M. S.; Dempster, D. W. Effect of denosumab treatment on bone histology and histomorphometry: The freedom and stand studies. <i>Osteoporosis International</i> May 2010;11():S134 | Wrong patient population                                  |
| 484. | Reid     | 2013      | Reid, I. R.; Black, D. M.; Eastell, R.; Bucci-Rechtweg, C.; Su, G.; Hue, T. F.; Mesenbrink, P.; Lyles, K. W.; Boonen, S.. Reduction in the risk of clinical fractures after a single dose of zoledronic Acid 5 milligrams. <i>Journal of Clinical Endocrinology and Metabolism</i> 2013;98(2):557-563. [DOI: 10.1210/jc.2012-2868]                                            | Systematic review and/or meta-analysis                    |
| 485. | Reid     | 2013      | Reid, I. R.; Black, D. M.; Eastell, R.; Bucci-Rechtweg, C.; Su, G.; Hue, T. F.; Mesenbrink, P.; Lyles, K. W.; Boonen, S. Reduction in the risk of clinical fractures after a single dose of zoledronic Acid 5 milligrams. <i>Journal of Clinical Endocrinology and Metabolism</i> 2013;98(2):557-563                                                                          | Systematic review and/or meta-analysis and/or pooled data |
| 486. | Reid     | 2018      | Reid, I.; Horne, A.; Mihov, B.; Stewart, A.; Garratt, L.; Bolland, M.; Bastin, S.; Gamble, G.. Zoledronate every 18 months for 6 years in osteopenic postmenopausal women: Effects on fractures and non-skeletal endpoints. <i>JBMR Plus</i> 2018;2 (Supplement 1):S14.                                                                                                       | Conference abstract                                       |
| 487. | Reid     | 2018<br>a | Reid, I.; Horne, A.; Mihov, B.; Stewart, A.; Garratt, L.; Bolland, M.; Bastin, S.; Gamble, G.. Zoledronate every 18 months for 6 years in osteopenic postmenopausal women reduces non-vertebral fractures and height loss. <i>Calcified Tissue International</i> 2018;102 (1 Supplement 1):S22-S23.                                                                           | Conference abstract                                       |
| 488. | Reid     | 2019      | Reid, I. R.; Horne, A. M.; Mihov, B.; Stewart, A.; Garratt, E.; Bastin, S.; Gamble, G. D.. Effects of Zoledronate on Cancer, Cardiac Events, and Mortality in Osteopenic Older Women. <i>Journal of Bone and Mineral Research</i> . 2019                                                                                                                                      | Commentary                                                |
| 489. | Ringe    | 2007      | Ringe, J. D.; Farahmand, P.; Schacht, E.; Rozehnal, A.. Superiority of a combined treatment of Alendronate and Alfacalcidol compared to the combination of Alendronate and plain vitamin D or Alfacalcidol alone in established postmenopausal or male osteoporosis (AAC-Trial). <i>Rheumatology International</i> 2007;27(5):425-434.                                        | Wrong patient population                                  |
| 490. | Rizzolli | 2002      | Rizzoli, R.; Greenspan, S. L.; Bone, G.; Schnitzer, T. J.; Watts, N. B.; Adami, S.; Foldes, A. J.; Roux, C.; Levine, M. A.; Uebelhart, B.; et al.,. Two-year results of once-weekly administration of alendronate 70 mg for the treatment of                                                                                                                                  | Extension study                                           |

| No.  | Authors         | Year | Reference (extracted from covidence)                                                                                                                                                                                                                                                                                                                                          | Reasons for exclusion                  |
|------|-----------------|------|-------------------------------------------------------------------------------------------------------------------------------------------------------------------------------------------------------------------------------------------------------------------------------------------------------------------------------------------------------------------------------|----------------------------------------|
|      |                 |      | postmenopausal osteoporosis. Journal of Bone and Mineral Research 2002;17(11):1988-1996. [DOI: 10.1359/jbmr.2002.17.11.1988]                                                                                                                                                                                                                                                  |                                        |
| 491. | Rizzoli         | 2010 | Rizzoli, R. Zoledronic Acid for the treatment and prevention of primary and secondary osteoporosis. Therapeutic Advances in Musculoskeletal Disease 2010;2(1):3-16                                                                                                                                                                                                            | Wrong study design                     |
| 492. | Rizzoli         | 2010 | Rizzoli, R.; Boonen, S.; Bone, H. G.; Minisola, S.; Wang, A.; Benhamou, C. L.; Halse, J.; Hoeck, H.; Siddhanti, S.; McClung, M.; Franchimont, N. The effect of denosumab on vertebral fracture risk by type and subgroup: Results from the FREEDOM trial. Osteoporosis International May 2010;1():S357-S358                                                                   | Conference abstract                    |
| 493. | Rodriguez       | 2021 | Rodriguez, Alexander J.; Abrahamsen, Bo. Cardiovascular Safety of Antifracture Medications in Patients With Osteoporosis: A Narrative Review of Evidence From Randomized Studies. JBMR Plus 2021;5(7):e10522                                                                                                                                                                  | Systematic review and/or meta-analysis |
| 494. | Rooney          | 2020 | Rooney, Amanda M.; Bostrom, Mathias P. G.; Dempster, David W.; Nieves, Jeri W.; Zhou, Hua; Cosman, Felicia. Loading modality and age influence teriparatide-induced bone formation in the human femoral neck. Bone 2020;136():115373                                                                                                                                          | Wrong patient population               |
| 495. | Rosenberg       | 2021 | Rosenberg, D.; Avni, T.; Gafter-Gvili, A.; Tsvetov, G.; Diker-Cohen, T. Denosumab is not associated with risk of malignancy: systematic review and meta-analysis of randomized controlled trials. Osteoporosis International 2021;32(3):413-424                                                                                                                               | Systematic review and/or meta-analysis |
| 496. | Robles-Carranza | 2012 | Robles-Carranza, L. P.; Chavez-Valencia, V.; Arce-Salinas, C. A. Comparison of the efficacy of annual zoledronic acid or weekly alendronate. A 3-yr analysis of postmenopausal women with low bone mineral density. Annals of the Rheumatic Disease. Conference: Annual European Congress of Rheumatology of the European League Against Rheumatism, EULAR 2012;71(SUPPL. 3): | Conference abstract                    |
| 497. | Rossini         | 2000 | Rossini, M.; Gatti, D.; Girardello, S.; Braga, V.; James, G.; Adami, S.. Effects of two intermittent alendronate regimens in the prevention or treatment of postmenopausal osteoporosis. Bone 2000;27(1):119-122.                                                                                                                                                             | Wrong outcomes                         |
| 498. | Roux            | 2004 | Roux, C.; Seeman, E.; Eastell, R.; Adachi, J.; Jackson, R. D.; Felsenberg, D.; Songcharoen, S.; Rizzoli, R.; Di Munno, O.; Horlait, S.; Valent, D.; Watts, N. B.. Efficacy of risedronate on clinical vertebral fractures within six months. Current Medical Research and Opinion April 2004;20(4):433-439                                                                    | Systematic review and/or meta-analysis |
| 499. | Roux            | 2010 | Roux, C.; Cummings, S.; Bone, H. G.; Rizzoli, R.; Minisola, S.; Wang, A.; Franchimont, N.; Benhamou, C. L.; Halse, J.; Hoeck, H.; Boonen, S.; Siddhanti, S.; McClung, M.. Effect of denosumab on the incidence of nonvertebral fractures in                                                                                                                                   | Conference abstract                    |

| No.  | Authors | Year      | Reference (extracted from covidence)                                                                                                                                                                                                                                                                                                                                                                                                                                                                                                       | Reasons for exclusion |
|------|---------|-----------|--------------------------------------------------------------------------------------------------------------------------------------------------------------------------------------------------------------------------------------------------------------------------------------------------------------------------------------------------------------------------------------------------------------------------------------------------------------------------------------------------------------------------------------------|-----------------------|
|      |         |           | postmenopausal women at increased risk of fracture: A freedom study subanalysis (study sponsored by Amgen Inc) (formore informationvisit theAmgen/GlaxoSmithKline scientific booth). Bone 2010;1):S213.                                                                                                                                                                                                                                                                                                                                    |                       |
| 500. | Roux    | 2011      | Roux, C. Fracture reduction throughout the skeleton: Implications for patient care. Osteoporosis International March 2011;1():S411                                                                                                                                                                                                                                                                                                                                                                                                         | Conference abstract   |
| 501. | Roux    | 2013      | Roux, C.; Fahrleitner-Pammer, A.; Ho, P. R.; Hawkins, F.; Hofbauer, L. C.; Micaelo, M.; Minisola, S.; Papaioannou, N.; Stone, M.; Wark, J.; Zillikens, M. C.; Ferreira, I.; Siddhanti, S.; Wagman, R. B.; Brown, J. P.. Denosumab versus risedronate: Efficacy and safety in postmenopausal women suboptimally adherent to alendronate therapy in a randomized open-label study. Annals of the Rheumatic Diseases. Conference: Annual European Congress of Rheumatology of the European League Against Rheumatism, EULAR 2013;72(SUPPL. 3) | Conference abstract   |
| 502. | Rubin   | 1997      | Rubin, B. R.. Alendronate useful in treating osteoporosis. The Journal of the American Osteopathic Association Feb 1997;97(2):77                                                                                                                                                                                                                                                                                                                                                                                                           | Commentary            |
| 503. | Rubin   | 2017      | Rubin, C.; Pouns, K.. Efficacy of treatment with slow-release sodium fluoride versus alendronate on bone mineral density and fractures in postmenopausal women. Journal of the American Geriatrics Society May 2017;65 (Supplement 1):S111-S112                                                                                                                                                                                                                                                                                            | Conference abstract   |
| 504. | Saag    | 2017      | Saag, K. G.; Petersen, J.; Brandi, M. L.; Karaplis, A.; Lorentzon, M.; Thomas, T.; Maddox, J.; Fan, M.; Meisner, P.; Grauer, A.. A randomized alendronate-controlled trial of romosozumab: Results of the phase 3 ARCH Study (Active-contRolled fraCture study in postmenopausal women with osteoporosis at High risk). Journal of Bone and Mineral Research December 2017;32 (Supplement 1):S54-S55                                                                                                                                       | Conference abstract   |
| 505. | Saag    | 2017<br>a | Saag, K.; Petersen, J.; Brandi, M. L.; Karaplis, A.; Lorentzon, M.; Thomas, T.; Maddox, J.; Fan, M.; Meisner, P. D.; Grauer, A.. A randomized alendronate-controlled trial of romosozumab: Results of the phase 3 active-controlled fracture study in postmenopausal women with osteoporosis at high risk. Arthritis and Rheumatology. Conference: American College of Rheumatology/Association of Rheumatology Health Professionals Annual Scientific Meeting, ACR/ARHP 2017;69(Supplement 10).                                           | Conference abstract   |
| 506. | Saag    | 2017<br>b | Saag, K. G.; Petersen, J.; Brandi, M. L.; Karaplis, A.; Lorentzon, M.; Thomas, T.; Maddox, J.; Fan, M.; Meisner, P.; Grauer, A.. A randomized alendronate-controlled trial of romosozumab: Results of the phase 3 arch study (active-controlled fracture study in postmenopausal women with osteoporosis at                                                                                                                                                                                                                                | Conference abstract   |

| No.  | Authors  | Year      | Reference (extracted from covidence)                                                                                                                                                                                                                                                                                                                                                                                                 | Reasons for exclusion                  |
|------|----------|-----------|--------------------------------------------------------------------------------------------------------------------------------------------------------------------------------------------------------------------------------------------------------------------------------------------------------------------------------------------------------------------------------------------------------------------------------------|----------------------------------------|
|      |          |           | high risk). Indian Journal of Rheumatology 2017;12 (5 Supplement 1):S11-S12.                                                                                                                                                                                                                                                                                                                                                         |                                        |
| 507. | Saag     | 2017      | Saag, K.; Miller, P. D.; Cosman, F.; Fitzpatrick, L. A.; Hattersley, G.; Gut, R.; Mitlak, B.; Bilezikian, J. P.; Dore, R. K. Persistent fracture reduction with abaloparatide-sc (tymlos <sup>TM</sup> ) followed by 24 months of alendronate. Arthritis and Rheumatology. Conference: American College of Rheumatology/Association of Rheumatology Health Professionals Annual Scientific Meeting, ACR/ARHP 2017;69(Supplement 10): | Conference abstract                    |
| 508. | Saag     | 2018      | Saag, K. G.; Wagman, R. B.; Geusens, P.; Adachi, J. D.; Messina, O. D.; Emkey, R.; Chapurlat, R.; Wang, A.; Pannacciulli, N.; Lems, W. F.. Denosumab versus risedronate in glucocorticoid-induced osteoporosis: a multicentre, randomised, double-blind, active-controlled, double-dummy, non-inferiority study. The Lancet Diabetes and Endocrinology 2018;6(6):445-454.                                                            | Wrong patient population               |
| 509. | Saag     | 2018<br>a | Saag, K.; Pannacciulli, N.; Geusens, P.; Adachi, J. D.; Messina, O. D.; Morales-Torres, J.; Emkey, R.; Butler, P. W.; Yin, X.; Lems, W. F.. Greater bmd gains with denosumab vs risedronate in glucocorticoid-treated subjects: Results from the final 24-month analysis of a randomized, double-blind, double-dummy study. Arthritis and Rheumatology 2018;70 (Supplement 9):2022-2023.                                             | Wrong patient population               |
| 510. | Saag     | 2018<br>b | Saag, K. G.; Miller, P. D.; Cosman, F.; Fitzpatrick, L. A.; Hattersley, G.; Mitlak, B.; Bilezikian, J. P.; Dore, R. K.. Persistent Fracture Reduction with Abaloparatide-SC (TYMLOSTM) Followed by 24 Months of Alendronate. Journal of Clinical Densitometry 2018;21 (4):1.                                                                                                                                                         | Extension study                        |
| 511. | Saito    | 2017      | Saito, T.; Sterbenz, J. M.; Malay, S.; Zhong, L.; MacEachern, M. P.; Chung, K. C.. Effectiveness of anti-osteoporotic drugs to prevent secondary fragility fractures: systematic review and meta-analysis. Osteoporosis International 2017;28(12):3289-3300.                                                                                                                                                                         | Systematic review and/or meta-analysis |
| 512. | Sambrook | 2010      | Sambrook, P.; Cranney, A.; Adachi, J. D.. Risk reduction of non-vertebral fractures with intravenous ibandronate: Post-hoc analysis from DIVA. Current Medical Research and Opinion 2010;26(3):599-604.                                                                                                                                                                                                                              | Wrong study design                     |
| 513. | Sambrook | 2011      | Sambrook, P. N.; Silverman, S. L.; Cauley, J. A.; Recknor, C.; Olson, M.; Su, G.; Boonen, S.; Black, D.; Adachi, J. D.. Health-related quality of life and treatment of postmenopausal osteoporosis: Results from the HORIZON-PFT. Bone 2011;48(6):1298-1304.                                                                                                                                                                        | Wrong outcomes                         |



| No.  | Authors    | Year      | Reference (extracted from covidence)                                                                                                                                                                                                                                                                                                                                                                                                    | Reasons for exclusion                  |
|------|------------|-----------|-----------------------------------------------------------------------------------------------------------------------------------------------------------------------------------------------------------------------------------------------------------------------------------------------------------------------------------------------------------------------------------------------------------------------------------------|----------------------------------------|
| 514. | Sanad      | 2011      | Sanad, Z.; Ellakwa, H.; Desouky, B.. Comparison of alendronate and raloxifene in postmenopausal women with osteoporosis. <i>Climacteric</i> 2011;14(3):369-377.                                                                                                                                                                                                                                                                         | Wrong outcomes                         |
| 515. | Sanderson  | 2015      | Sanderson, J.. Clinical effectiveness of bisphosphonates for prevention of fragility fractures: A systematic review and network meta-analysis. <i>Value in Health</i> 2015;18 (7):A634.                                                                                                                                                                                                                                                 | Systematic review and/or meta-analysis |
| 516. | Sanderson  | 2016      | Sanderson, J.; Martyn-St James, M.; Stevens, J.; Goka, E.; Wong, R.; Campbell, F.; Selby, P.; Gittoes, N.; Davis, S.. Clinical effectiveness of bisphosphonates for the prevention of fragility fractures: A systematic review and network meta-analysis. <i>Bone</i> 2016;89:52-58.                                                                                                                                                    | Systematic review and/or meta-analysis |
| 517. | Sanford    | 2012      | Sanford, M.; McCormack, P. L.. Spotlight on eldecacitol in osteoporosis. <i>Drugs and Aging</i> 2012;29(1):69-71.                                                                                                                                                                                                                                                                                                                       | Wrong intervention                     |
| 518. | Santiago   | 2014      | Santiago, P.; Williams, R.; Komm, B.; Pan, K.; Arias, L.; Mirkin, S.. Evaluation of efficacy and safety of bazedoxifene in a mexican population of women with osteoporosis. <i>Climacteric</i> 2014;1):81.                                                                                                                                                                                                                              | Wrong outcomes                         |
| 519. | Santora    | 2020      | Santora, Arthur C.; Sharma, Anupa. Bisphosphonates: Mechanisms of Action and Role in Osteoporosis Therapy. <i>Contemporary Endocrinology</i> 2020;():277-307                                                                                                                                                                                                                                                                            | Wrong study design                     |
| 520. | Sato       | 2005      | Sato, Y.; Kanoko, T.; Satoh, K.; Iwamoto, J.. The prevention of hip fracture with risedronate and ergocalciferol plus calcium supplementation in elderly women with alzheimer disease: A randomized controlled trial. <i>Archives of Internal Medicine</i> 2005;165(15):1737-1742.                                                                                                                                                      | Retracted                              |
| 521. | Sato       | 2005<br>a | Sato, Y.; Iwamoto, J.; Kanoko, T.; Satoh, K.. Risedronate therapy for prevention of hip fracture after stroke in elderly women. <i>Neurology</i> 2005;64(5):811-816.                                                                                                                                                                                                                                                                    | Retracted                              |
| 522. | Sato       | 2010      | Sato, Y.; Honda, Y.; Umeno, K.; Hayashida, N.; Iwamoto, J.; Takeda, T.; Matsumoto, H.. The prevention of hip fracture with menatetrenone and risedronate plus calcium supplementation in elderly patients with Alzheimer disease: A randomized controlled trial. <i>Kurume Medical Journal</i> 2010;57(4):117-124.                                                                                                                      | Retracted                              |
| 523. | Schemitsch | 2020      | Schemitsch, Emil H.; Miclau, Theodore; Karachalios, Theofilos; Nowak, Lauren L.; Sancheti, Parag; Poolman, Rudolf W.; Caminis, John; Daizadeh, Nadia; Dent-Acosta, Ricardo E.; Egbuna, Ogo; Chines, Arkadi; Maddox, Judy; Grauer, Andreas; Bhandari, Mohit. A Randomized, Placebo-Controlled Study of Romosozumab for the Treatment of Hip Fractures. <i>The Journal of bone and joint surgery. American volume</i> 2020;102(8):693-702 | Wrong patient population               |

| No.  | Authors   | Year | Reference (extracted from covidence)                                                                                                                                                                                                                                                                                                                               | Reasons for exclusion                  |
|------|-----------|------|--------------------------------------------------------------------------------------------------------------------------------------------------------------------------------------------------------------------------------------------------------------------------------------------------------------------------------------------------------------------|----------------------------------------|
| 524. | Schnitzer | 2000 | Schnitzer, T.; Bone, H. G.; Crepaldi, G.; Adami, S.; McClung, M.; Kiel, D.; Felsenberg, D.; Recker, R. R.; Tonino, R. P.; Roux, C.; et al., Therapeutic equivalence of alendronate 70 mg once-weekly and alendronate 10 mg daily in the treatment of osteoporosis. <i>Aging Clinical and Experimental Research</i> 2000;12(1):1-12                                 | Wrong intervention                     |
| 525. | Sebba     | 2009 | Sebba, A. I.; Emkey, R. D.; Kohles, J. D.; Sambrook, P. N. Ibandronate dose response is associated with increases in bone mineral density and reductions in clinical fractures: Results of a meta-analysis. <i>Bone</i> March 2009;44(3):423-427                                                                                                                   | Systematic review and/or meta-analysis |
| 526. | Seeman    | 1999 | Seeman, E.. The antifracture efficacy of alendronate. <i>International Journal of Clinical Practice</i> 1999;Supplement. 101:40-45.                                                                                                                                                                                                                                | Systematic review and/or meta-analysis |
| 527. | Seeman    | 2006 | Seeman, E.; Crans, G. G.; Diez-Perez, A.; Pinette, K. V.; Delmas, P. D.. Anti-vertebral fracture efficacy of raloxifene: A meta-analysis. <i>Osteoporosis International</i> February 2006;17(2):313-316                                                                                                                                                            | Systematic review and/or meta-analysis |
| 528. | Seeman    | 2009 | Seeman, E.; Black, D.; Bucci-Rechtweg, C.; Eastell, R.; Boonen, S.; Mesenbrink, P. Zoledronic acid substantially reduces the risk of morphometric vertebral and clinical fractures. <i>Arthritis and Rheumatism</i> 2009;10():892                                                                                                                                  | Conference abstract                    |
| 529. | Seeman    | 2012 | Seeman, E.; Libanati, C.; Austin, M.; Chapurlat, R.; Boyd, S. K.; Zebaze, R.; Hanley, D. A.; Zanchetta, J.; Grauer, A.; Bilezikian, J. P.. The transitory PTH increase following denosumab administration is associated with reduced intracortical porosity: A distinctive characteristic of denosumab therapy. <i>Osteoporosis International</i> 2012;2):S76-S77. | Wrong outcomes                         |
| 530. | Seeman    | 2019 | Seeman, E.; Ferrari, S. The importance of bone forming agents in the treatment of severe osteoporosis. <i>Osteoporosis International</i> 2019;30(Supplement 1):S47-S48                                                                                                                                                                                             | Conference abstract, with no new data  |
| 531. | Seeto     | 2021 | Seeto, Alexander H.; Abrahamsen, Bo; Ebeling, Peter R.; Rodriguez, Alexander J. Cardiovascular Safety of Denosumab Across Multiple Indications: A Systematic Review and Meta-Analysis of Randomized Trials. <i>Journal of bone and mineral research : the official journal of the American Society for Bone and Mineral Research</i> 2021;36(1):24-40              | Systematic review and/or meta-analysis |
| 532. | Selim     | 2016 | Selim, A.; Ghoname, S.; Karabelas, P.. The efficacy of parathyroid hormone analogues in combination with bisphosphonates for the prevention of osteoporotic fractures. A simulation meta-analysis of randomized controlled trials. <i>Journal of Bone and Mineral Research. Conference</i> 2016;31(Supplement 1).                                                  | Systematic review and/or meta-analysis |
| 533. | Selim     | 2020 | Selim, Abdulhafez; Selim, Omar; Karabelas, Paula. Cardiovascular Risk in Patients Treated with Romosozumab: Disproportional Meta-Analysis.                                                                                                                                                                                                                         | Conference abstract, with no new data  |

| No.  | Authors | Year | Reference (extracted from covidence)                                                                                                                                                                                                                                                                                                                                                                 | Reasons for exclusion                  |
|------|---------|------|------------------------------------------------------------------------------------------------------------------------------------------------------------------------------------------------------------------------------------------------------------------------------------------------------------------------------------------------------------------------------------------------------|----------------------------------------|
|      |         |      | Journal of Bone and Mineral Research 2020;35(SUPPL 1):246                                                                                                                                                                                                                                                                                                                                            |                                        |
| 534. | Serrano | 2013 | Serrano, A. J.; Begona, L.; Anitua, E.; Cobos, R.; Orive, G.. Systematic review and meta-analysis of the efficacy and safety of alendronate and zoledronate for the treatment of postmenopausal osteoporosis. <i>Gynecological Endocrinology</i> 2013;29(12):1005-1014.                                                                                                                              | Systematic review and/or meta-analysis |
| 535. | Sestak  | 2014 | Sestak, I.; Singh, S.; Cuzick, J.; Blake, G. M.; Patel, R.; Gossiel, F.; Coleman, R.; Dowsett, M.; Forbes, J. F.; Howell, A.; Eastell, R.. Changes in bone mineral density at 3 years in postmenopausal women receiving anastrozole and risedronate in the IBIS-II bone substudy: an international, double-blind, randomised, placebo-controlled trial. <i>Lancet Oncology</i> 2014;15(13):1460-1468 | Wrong outcomes                         |
| 536. | Shakeri | 2020 | Shakeri, Ahmad; Adanty, Christopher. Romosozumab (sclerostin monoclonal antibody) for the treatment of osteoporosis in postmenopausal women: A review. <i>Journal of population therapeutics and clinical pharmacology = Journal de la therapeutique des populations et de la pharmacologie clinique</i> 2020;27(1):e25-e31                                                                          | Systematic review and/or meta-analysis |
| 537. | Shao    | 2015 | Shao, H. B.; Yao, Y. M.; Wang, Z. Y.; Zhang, Q. F.; Wei, W.. Effects of combined alendronate and alfacalcidol on prevention of fractures in osteoporosis patients: A network meta-analysis. <i>International Journal of Clinical and Experimental Medicine</i> 2015;8(8):12935-12941.                                                                                                                | Systematic review and/or meta-analysis |
| 538. | Shapses | 2011 | Shapses, S. A.; Kendler, D. L.; Robson, R.; Hansen, K. E.; Sherrell, R. M.; Field, M. P.; Woolf, E.; Berd, Y.; Mantz, A. M.; Santora, A. C., 2nd. Effect of alendronate and vitamin D3 on fractional calcium absorption in a double-blind, randomized, placebo-controlled trial in postmenopausal osteoporotic women. <i>Journal of Bone &amp; Mineral Research</i> 2011;26(8):1836-44.              | Wrong outcomes                         |
| 539. | Shen    | 2011 | Shen, L.; Xie, X.; Su, Y.; Luo, C.; Zhang, C.; Zeng, B.. Parathyroid hormone versus bisphosphonate treatment on bone mineral density in osteoporosis therapy: a meta-analysis of randomized controlled trials. <i>PLoS ONE [Electronic Resource]</i> 2011;6(10):e26267                                                                                                                               | Systematic review and/or meta-analysis |
| 540. | Sherman | 2001 | Sherman, S.. Preventing and treating osteoporosis: Strategies at the millennium. <i>Annals of the New York Academy of Sciences</i> 2001;949:188-197                                                                                                                                                                                                                                                  | Systematic review and/or meta-analysis |
| 541. | Shi     | 2016 | Shi, Z.; Zhou, H.; Pan, B.; Lu, L.; Liu, J.; Kang, Y.; Yao, X.; Feng, S.. Effectiveness of Teriparatide on Fracture Healing: A Systematic Review and Meta-Analysis. <i>PLoS ONE [Electronic Resource]</i> 2016;11(12):e0168691                                                                                                                                                                       | Systematic review and/or meta-analysis |
| 542. | Shi     | 2019 | Shi, Lei; Min, Nan; Wang, Fei; Xue, Qing-Yun. Bisphosphonates for Secondary Prevention of                                                                                                                                                                                                                                                                                                            | Systematic review and/or meta-analysis |

| No.  | Authors   | Year | Reference (extracted from covidence)                                                                                                                                                                                                                                                                                                                                                            | Reasons for exclusion                  |
|------|-----------|------|-------------------------------------------------------------------------------------------------------------------------------------------------------------------------------------------------------------------------------------------------------------------------------------------------------------------------------------------------------------------------------------------------|----------------------------------------|
|      |           |      | Osteoporotic Fractures: A Bayesian Network Meta-Analysis of Randomized Controlled Trials. <i>BioMed research international</i> 2019;2019():2594149                                                                                                                                                                                                                                              |                                        |
| 543. | Shi       | 2021 | Shi, Hong; Santos, Heitor O.; de Souza, Ivan G. O.; Hoilat, Gilles Jadd; Martins, Carlos E. C.; Varkaneh, Hamed Kord; Alkhwildi, Joud Amer; Hejji, Aljawhara Talal; Almuqayyid, Faisal; Abu-Zaid, Ahmed. The Effect of Raloxifene Treatment on Lipid Profile in Elderly Individuals: A Systematic Review and Meta-analysis of Randomized Clinical Trials. <i>Clinical therapeutics</i> 2021;(): | Systematic review and/or meta-analysis |
| 544. | Shigenobu | 2019 | Shigenobu, Keiichi; Hashimoto, Tomoyuki; Kanayama, Masahiro; Ohha, Humihiro; Yamane, Shigeru. The efficacy of osteoporotic treatment in patients with new spinal vertebral compression fracture pain, ADL, QOL, bone metabolism and fracture-healing - In comparison with weekly teriparatide with bisphosphonate. <i>Bone Reports</i> 2019;11():100217                                         | Wrong patient population               |
| 545. | Shiraki   | 2013 | Shiraki, M.; Sugimoto, T.; Nakamura, T.. Effects of a single injection of teriparatide on bone turnover markers in postmenopausal women. <i>Osteoporosis International</i> 2013;24(1):219-226.                                                                                                                                                                                                  | Wrong outcomes                         |
| 546. | Sieber    | 2013 | Sieber, P.; Lardelli, P.; Kraenzlin, C. A.; Kraenzlin, M. E.; Meier, C. Intravenous bisphosphonates for postmenopausal osteoporosis: Safety profiles of zoledronic acid and ibandronate in clinical practice. <i>Clinical Drug Investigation</i> February 2013;33(2):117-122                                                                                                                    | Wrong study design                     |
| 547. | Silverman | 2009 | Silverman, S.; Viswanathan, H.; Yang, Y.; Eis, S. R.; Fardellone, P.; Gilchrist, N.; Lips, P. Relationships between presence, severity, and location of prevalent vertebral fractures and health related quality of life (HRQoL). <i>Arthritis and Rheumatism</i> 2009;10():867                                                                                                                 | Conference abstract                    |
| 548. | Silverman | 2010 | Silverman, S.; Viswanathan, H.; Wang, A.; Ragi-Eis, S.; Fardellone, P.; Gilchrist, N.; Lips, P.; Nevitt, M.; Palacios, S.; Pavelka, K.; Revicki, D.; Simon, J.; Macarios, D.; Siris, E. Evaluation of health-related quality of life in postmenopausal women with osteoporosis who participated in the freedom trial. <i>Osteoporosis International</i> May 2010;1():S14-S15                    | Conference abstract                    |
| 549. | Silverman | 2011 | Silverman, S. L.; Kriegman, A.; Goncalves, J.; Kianifard, F.; Carlson, T.; Leary, E.. Effect of acetaminophen and fluvastatin on post-dose symptoms following infusion of zoledronic acid. <i>Osteoporosis International</i> 2011;22(8):2337-2345.                                                                                                                                              | Wrong outcomes                         |
| 550. | Silverman | 2012 | Silverman, S.; Viswanathan, H. N.; Yang, Y. C.; Wang, A.; Boonen, S.; Ragi-Eis, S.; Fardellone, P.; Gilchrist, N.; Lips, P.; Nevitt, M.; Gil-Antunano, S. P.; Pavelka, K.; Revicki, D.; Simon, J.; MacArios, D.; Siris, E. S.. Impact of clinical fractures on health-related quality of life is dependent on time of                                                                           | Wrong outcomes                         |

| No.  | Authors | Year | Reference (extracted from covidence)                                                                                                                                                                                                                                                                                                                                                                               | Reasons for exclusion                  |
|------|---------|------|--------------------------------------------------------------------------------------------------------------------------------------------------------------------------------------------------------------------------------------------------------------------------------------------------------------------------------------------------------------------------------------------------------------------|----------------------------------------|
|      |         |      | assessment since fracture: Results from the FREEDOM trial. <i>Osteoporosis International</i> 2012;23(4):1361-1369.                                                                                                                                                                                                                                                                                                 |                                        |
| 551. | Simpson | 2020 | Simpson, E. L.; Martyn-St James, M.; Hamilton, J.; Wong, R.; Gittoes, N.; Selby, P.; Davis, S.. Clinical effectiveness of denosumab, raloxifene, romosozumab, and teriparatide for the prevention of osteoporotic fragility fractures: A systematic review and network meta-analysis. <i>Bone</i> January 2020;130 (no pagination)(115081)                                                                         | Systematic review and/or meta-analysis |
| 552. | Singh   | 2019 | Singh, R.; Ibrahim, A.; Carey, J. J. Long-term safety of zoledronic acid treatment for osteoporosis in men and women: A systematic review and meta-analysis of clinical trials. <i>JBMR Plus</i> 2019;3(Supplement 3):55-56                                                                                                                                                                                        | Conference abstract, with no new data  |
| 553. | Singh   | 2021 | Singh, Inderjeet; Jose, Vinu; Patel, Ronak; Arora, Sumit. Denosumab biosimilar in postmenopausal osteoporotic women: A randomized, assessor-blind, active-controlled clinical trial. <i>Indian Journal of Pharmacology</i> 2021;53(1):6-12                                                                                                                                                                         | Wrong patient population               |
| 554. | Singh   | 2021 | Singh, S.; Dutta, S.; Kumar, T.; Sachin, J.; Sharma, J.; Varthya, S. B.; Khasbage, S. A systematic review and meta-analysis of efficacy and safety of Romosozumab in postmenopausal osteoporosis. <i>Osteoporosis International</i> 2021;():                                                                                                                                                                       | Systematic review and/or meta-analysis |
| 555. | Siris   | 2016 | Siris, E.; Pannacciulli, N.; Miller, P. D.; Lewiecki, E. M.; Chapurlat, R.; Jodar-Gimeno, E.; Daizadeh, N. S.; Wagman, R. B.; Kanis, J. A.. Denosumab treatment for 10 years in postmenopausal women with osteoporosis was associated with substantially lower fracture incidence relative to their baseline FRAX-predicted probability. <i>Arthritis and Rheumatology</i> October 2016;68 (Supplement 10):430-431 | Conference abstract                    |
| 556. | Siris   | 2017 | Siris, E.; Pannacciulli, N.; Miller, P. D.; Lewiecki, E. M.; Chapurlat, R.; Gimeno, E. J.; Daizadeh, N. S.; Wagman, R. B.; Kanis, J. A. Denosumab treatment for 10 years in postmenopausal women with osteoporosis was associated with substantially lower fracture incidence relative to their baseline frax-predicted probability. <i>Osteoporosis International</i> 2017;28 (Supplement 1)():S179-S180          | Extension study                        |
| 557. | Slaton  | 2020 | Slaton, Rachel M.; Boyd, Katie; Iranikhah, Maryam. Romosozumab and Sequential Therapy in Postmenopausal Osteoporosis. <i>The Senior care pharmacist</i> 2020;35(7):297-308                                                                                                                                                                                                                                         | Full-text not available                |
| 558. | Solling | 2019 | Solling, Anne Sophie; Harslof, Torben; Langdahl, Bente Lomholt. Treatment with zoledronic acid subsequent to treatment with denosumab. <i>Journal of Bone and Mineral Research</i> 2019;34(Supplement 1):53                                                                                                                                                                                                        | Conference abstract, with no new data  |
| 559. | Solling | 2020 | Solling, Anne Sophie; Harslof, Torben; Langdahl, Bente. Treatment with Zoledronate Subsequent to                                                                                                                                                                                                                                                                                                                   | Wrong patient population               |

| No.  | Authors   | Year | Reference (extracted from covidence)                                                                                                                                                                                                                                                                                                                          | Reasons for exclusion                  |
|------|-----------|------|---------------------------------------------------------------------------------------------------------------------------------------------------------------------------------------------------------------------------------------------------------------------------------------------------------------------------------------------------------------|----------------------------------------|
|      |           |      | Denosumab in Osteoporosis: a Randomized Trial. Journal of bone and mineral research : the official journal of the American Society for Bone and Mineral Research 2020;35(10):1858-1870                                                                                                                                                                        |                                        |
| 560. | Solling   | 2021 | Solling, Anne Sophie; Harslof, Torben; Langdahl, Bente. Treatment With Zoledronate Subsequent to Denosumab in Osteoporosis: A 2-Year Randomized Study. Journal of bone and mineral research : the official journal of the American Society for Bone and Mineral Research 2021;36(7):1245-1254                                                                 | Wrong patient population               |
| 561. | Sorbera   | 2000 | Sorbera, L. A.; Leeson, P. A.. Treatment of osteoporosis. Drugs of the Future 2000;25(10):1007-1010                                                                                                                                                                                                                                                           | Systematic review and/or meta-analysis |
| 562. | Ste-Marie | 2009 | Ste-Marie, L. G.; Brown, J. P.; Beary, J. F.; Matzkin, E.; Darbie, L. M.; Burgio, D. E.; Racewicz, A. J.. Comparison of the effects of once-monthly versus once-daily risedronate in postmenopausal osteoporosis: a phase II, 6-month, multicenter, randomized, double-blind, active-controlled, dose-ranging study. Clinical Therapeutics 2009;31(2):272-85  | Wrong intervention                     |
| 563. | Stepan    | 1999 | Stepan, J. J.; Vokrouhlicka, J.. Comparison of biochemical markers of bone remodelling in the assessment of the effects of alendronate on bone in postmenopausal osteoporosis. Clinica Chimica Acta 1999;288(1-2):121-135.                                                                                                                                    | Wrong outcomes                         |
| 564. | Strukov   | 2019 | Strukov, V. I.; Kislov, A. I.; Eremina, N. V.; Deriabina, G. P.; Sergeeva-Kondrachenko, M. Y.; Antropov, A. Y.; Kuzmina, Y. V.; Tayrova, K. R.; Petrova, E. V.; Elistratov, D. G.; Strukova-Jones, O. V.. The use of bone tissue non-steroid anabolizators in treatment of osteoporosis. Research Journal of Pharmacy and Technology May 2019;12(5):2195-2199 | Wrong intervention                     |
| 565. | Sugimoto  | 2020 | Sugimoto, Toshitsugu; Matsumoto, Toshio; Hosoi, Takayuki; Shiraki, Masataka; Kobayashi, Makiko; Okubo, Naoki; Takami, Hideo; Nakamura, Toshitaka. Efficacy of denosumab co-administered with vitamin D and Ca by baseline vitamin D status. Journal of bone and mineral metabolism 2020;38(6):848-858                                                         | Wrong patient population               |
| 566. | Sunyecz   | 2009 | Sunyecz, J. A.. Once-a-month risedronate in postmenopausal osteoporosis. Postgraduate Medicine July 2009;121(4):42-44                                                                                                                                                                                                                                         | Commentary                             |
| 567. | Taguchi   | 2019 | Taguchi, Akira; Shiraki, Masataka; Tanaka, Satoshi; Ohshige, Hideyo; Nakamura, Toshitaka. Improved periodontal disease and prevention of tooth loss in osteoporosis patients receiving once-yearly zoledronic acid: a randomized clinical trial. Menopause (New York, N.Y.) 2019;26(11):1277-1283                                                             | Wrong patient population               |
| 568. | Takacs    | 2019 | Takacs, I.; Jokai, E.; Kovats, D. E.; Aradi, I. The first biosimilar approved for the treatment of osteoporosis: results of a comparative                                                                                                                                                                                                                     | Wrong patient population               |

| No.  | Authors | Year      | Reference (extracted from covidence)                                                                                                                                                                                                                                                                                                                                                                                                              | Reasons for exclusion                  |
|------|---------|-----------|---------------------------------------------------------------------------------------------------------------------------------------------------------------------------------------------------------------------------------------------------------------------------------------------------------------------------------------------------------------------------------------------------------------------------------------------------|----------------------------------------|
|      |         |           | pharmacokinetic/pharmacodynamic study.<br>Osteoporosis international : a journal established as result of cooperation between the European Foundation for Osteoporosis and the National Osteoporosis Foundation of the USA<br>2019;30(3):675-683                                                                                                                                                                                                  |                                        |
| 569. | Takada  | 2020      | Takada, Junichi; Dinavahi, Rajani; Milmont, Cassandra E.; Grauer, Andreas; Miyauchi, Akimitsu; Hamaya, Etsuro; Hiramata, Toshiyasu; Nakamura, Yoichi; Libanati, Cesar. Relationship between P1NP, a biochemical marker of bone turnover, and bone mineral density in patients transitioned from alendronate to romosozumab or teriparatide: a post hoc analysis of the STRUCTURE trial. Journal of bone and mineral metabolism 2020;38(3):310-315 | Wrong outcomes                         |
| 570. | Takada  | 2021      | Takada, Junichi; Yoshimura, Takeshi; Uzawa, Toyonobu. Twice-weekly teriparatide improves lumbar spine BMD independent of pre-treatment BMD and bone turnover marker levels. Journal of bone and mineral metabolism 2021;39(3):484-493                                                                                                                                                                                                             | Wrong patient population               |
| 571. | Tan     | 2019      | Tan, X.; Wen, F.; Yang, W.; Xie, J. Y.; Ding, L. L.; Mo, Y. X.. Comparative efficacy and safety of pharmacological interventions for osteoporosis in postmenopausal women: a network meta-analysis (Chongqing, China). Menopause (New York, N.Y.) 01 Aug 2019;26(8):929-939                                                                                                                                                                       | Systematic review and/or meta-analysis |
| 572. | Tan     | 2019      | Tan, Xiang; Wen, Fei; Yang, Wei; Xie, Ji-Yong; Ding, Liang-Liang; Mo, Yu-Xia. Comparative efficacy and safety of pharmacological interventions for osteoporosis in postmenopausal women: a network meta-analysis (Chongqing, China). Menopause (New York, N.Y.) 2019;26(8):929-939                                                                                                                                                                | Systematic review and/or meta-analysis |
| 573. | Tanko   | 2003      | Tanko, L. B.; Mouritzen, U.; Lehmann, H. J.; Warming, L.; Moelgaard, A.; Christgau, S.; Qvist, P.; Baumann, M.; Wieczorek, L.; Hoyle, N.; Christiansen, C.. Oral ibandronate: changes in markers of bone turnover during adequately dosed continuous and weekly therapy and during different suboptimally dosed treatment regimens. Bone 2003;32(6):687-93.                                                                                       | Wrong outcomes                         |
| 574. | Tanko   | 2003<br>a | Tanko, L. B.; Felsenberg, D.; Czerwinski, E.; Burdeska, A.; Jonkanski, I.; Hughes, C.; Christiansen, C.. Oral weekly ibandronate prevents bone loss in postmenopausal women. Journal of Internal Medicine 2003;254(2):159-167.                                                                                                                                                                                                                    | Wrong outcomes                         |
| 575. | Taylor  | 2001      | Taylor, A. L.. Risedronate: A new bisphosphonate on the block. Medicine Today 2001;2(6):109-110                                                                                                                                                                                                                                                                                                                                                   | Commentary                             |
| 576. | Tian    | 2021      | Tian, Aixian; Lu, Bin; Li, Yan; Ma, Jianxiong; Jia, Haobo; Ma, Xinlong; Zhu, Shan. Romosozumab versus Teriparatide for the Treatment of Postmenopausal Osteoporosis: A Systematic Review and Meta-analysis through a Grade Analysis                                                                                                                                                                                                               | Systematic review and/or meta-analysis |

| No.  | Authors    | Year      | Reference (extracted from covidence)                                                                                                                                                                                                                                                                                                                 | Reasons for exclusion    |
|------|------------|-----------|------------------------------------------------------------------------------------------------------------------------------------------------------------------------------------------------------------------------------------------------------------------------------------------------------------------------------------------------------|--------------------------|
|      |            |           | of Evidence. Orthopaedic surgery 2021;13(7):1941-1950                                                                                                                                                                                                                                                                                                |                          |
| 577. | Tile       | 2020      | Tile, Lianne; Bleakney, Robert; Tomlinson, George; Ridout, Rowena; Cheung, Angela M.; Khan, Aliya; Lau, Adrian N. C.; Chang, Jessica; Lakhesar, Jasmine; Scher, Judy; Hu, Hanxian; Adachi, Jonathan D. Teriparatide for the healing of incomplete Atypical Femur Fractures: The TAFF Trial. Journal of Bone and Mineral Research 2020;35(SUPPL 1):23 | Wrong patient population |
| 578. | Torrington | 2012      | Torrington, O.; Simon, J.; Recknor, C.; Moffet, A.; Adachi, J.; Franek, E.; Lewiecki, E.; Mautalen, C.; Ragi Eis, S.; Nicholson, G.; Muschitz, C.; Nuti, R.; Wang, A.; Libanati, C. Denosumab effects on radius BMD, estimated strength, and wrist fractures: 3-year results from the FREEDOM study. Bone May 2012;1():S54-S55                       | Conference abstract      |
| 579. | Trimpou    | 2016      | Trimpou, P.; Kontogeorgos, G.; Laine, C.; Landin-Wilhelmsen, K. Comparison between teriparatide (PTH) and growth hormone (GH) treatment during 3 years in established osteoporosis Endocrine Reviews. Conference: 98th Annual Meeting and Expo of the Endocrine Society, ENDO 2016;37(2 Supplement 1):                                               | Conference abstract      |
| 580. | Tsai       | 2013      | Tsai, J. N.; Uihlein, A. V.; Lee, H.; Kumbhani, R.; Siwila-Sackman, E.; McKay, E. A.; Burnett-Bowie, S. A. M.; Neer, R. M.; Leder, B. Z.. Teriparatide and denosumab, alone or combined, in women with postmenopausal osteoporosis: The DATA study randomised trial. The Lancet 2013;382(9886):50-56.                                                | Wrong outcomes           |
| 581. | Tsai       | 2016      | Tsai, J. N.; Uihlein, A. V.; Burnett-Bowie, S. M.; Neer, R. M.; Derrico, N. P.; Lee, H.; Bouxsein, M. L.; Leder, B. Z.. Effects of two years of teriparatide, denosumab, or both on bone microarchitecture and strength (DATA-HRpQCT study). Journal of Clinical Endocrinology and Metabolism 2016;101(5):2023-2030.                                 | Wrong outcomes           |
| 582. | Tsai       | 2017      | Tsai, J. N.; Jiang, L. A.; Lee, H.; Hans, D.; Leder, B. Z.. Effects of Teriparatide, Denosumab, or Both on Spine Trabecular Microarchitecture in DATA-Switch: a Randomized Controlled Trial. Journal of Clinical Densitometry 2017;20(4):507-512                                                                                                     | Wrong outcomes           |
| 583. | Tsai       | 2017<br>a | Tsai, J. N.; Burnett-Bowie, S. M.; Lee, H.; Leder, B. Z.. Relationship between bone turnover and density with teriparatide, denosumab or both in women in the DATA study. Bone 2017;95:20-25                                                                                                                                                         | Wrong outcomes           |
| 584. | Tsai       | 2019      | Tsai, J. N.; Lee, H.; David, N. L.; Eastell, R.; Leder, B. Z.. Combination denosumab and high dose teriparatide for postmenopausal osteoporosis (DATA-HD): a randomised, controlled phase 4 trial.                                                                                                                                                   | Wrong outcomes           |



| No.  | Authors         | Year | Reference (extracted from covidence)                                                                                                                                                                                                                                                                                                    | Reasons for exclusion                  |
|------|-----------------|------|-----------------------------------------------------------------------------------------------------------------------------------------------------------------------------------------------------------------------------------------------------------------------------------------------------------------------------------------|----------------------------------------|
|      |                 |      | The Lancet Diabetes and Endocrinology October 2019;7(10):767-775                                                                                                                                                                                                                                                                        |                                        |
| 585. | Tsuda           | 2020 | Tsuda, Takayuki; Hashimoto, Yoshichika; Okamoto, Yasunori; Ando, Wataru; Ebina, Kosuke. Meta-analysis for the efficacy of bisphosphonates on hip fracture prevention. Journal of bone and mineral metabolism 2020;38(5):678-686                                                                                                         | Systematic review and/or meta-analysis |
| 586. | Tuck            | 2008 | Tuck, S. P.. (iii) Antifracture efficacy of osteoporosis treatments. Current Orthopaedics October 2008;22(5):328-335                                                                                                                                                                                                                    | Systematic review and/or meta-analysis |
| 587. | Uihlein         | 2015 | Uihlein, A.; Burnett-Bowie, S. A.; Neer, R.; Tuck, P.; Wallace, P.; Bouxsein, M.; Leder, B.. Effect of denosumab (DMAB) and teriparatide (TPTD) transitions on peripheral bone mineral density (BMD) and microarchitecture: The DATA-Switch HR-pQCT study. Journal of Bone and Mineral Research. Conference 2015;30(Supplement 1)       | Conference abstract                    |
| 588. | Utian           | 2004 | Utian, W. H.; Gass, M. L.; Pickar, J. H.. Body mass index does not influence response to treatment, nor does body weight change with lower doses of conjugated estrogens and medroxyprogesterone acetate in early postmenopausal women. Menopause 2004;11(3):306-14                                                                     | Wrong outcomes                         |
| 589. | van Schoor      | 2008 | van Schoor, N. M.; Ewing, S. K.; O'Neill, T. W.; Lunt, M.; Smit, J. H.; Lips, P.. Impact of prevalent and incident vertebral fractures on utility: results from a patient-based and a population-based sample. Quality of Life Research 2008;17(1):159-67                                                                               | Wrong study design                     |
| 590. | Vastag          | 2006 | Vastag, B.. Raloxifene prevails in STAR trial, may face easier road to acceptance than previous drugs. Journal of the National Cancer Institute 7 Jun 2006;98(11):733-735                                                                                                                                                               | Commentary                             |
| 591. | Von keyserlingk | 2011 | von Keyserlingk, C.; Hopkins, R.; Anastasilakis, A.; Toulis, K.; Goeree, R.; Tarride, J. E.; Xie, F.. Clinical Efficacy and Safety of Denosumab in Postmenopausal Women with Low Bone Mineral Density and Osteoporosis: A Meta-Analysis. Seminars in Arthritis and Rheumatism 2011;41(2):178-186.                                       | Systematic review and/or meta-analysis |
| 592. | vonTirpitz      | 2003 | Von Tirpitz, C.; Klaus, J.; Steinkamp, M.; Hofbauer, L. C.; Kratzer, W.; Mason, R.; Boehm, B. O.; Adler, G.; Reinshagen, M.. Therapy of osteoporosis in patients with Crohn's disease: A randomized study comparing sodium fluoride and ibandronate. Alimentary Pharmacology and Therapeutics 2003;17(6):807-816.                       | Wrong patient population               |
| 593. | Vorhendi        | 2020 | Vorhendi, N.; Hanak, L.; Hegyi, P.; Szako, L.; Csiki, E.; Parniczky, A.; Eross, B.; Domotor, Z. R.; Kiss, S. Bisphosphonate treatment of osteoporosis does not increase the risk of severe gastrointestinal side effects: A meta-analysis of randomized controlled trials. United European Gastroenterology Journal 2020;8(8 SUPPL):217 | Conference abstract, with no new data  |

| No.  | Authors   | Year   | Reference (extracted from covidence)                                                                                                                                                                                                                                                                            | Reasons for exclusion                  |
|------|-----------|--------|-----------------------------------------------------------------------------------------------------------------------------------------------------------------------------------------------------------------------------------------------------------------------------------------------------------------|----------------------------------------|
| 594. | Vukicevic | 2011   | Vukicevic, S.; Grgurevi, L.. The PEARL trial: Lasofoxifene and incidence of fractures, breast cancer and cardiovascular events in postmenopausal osteoporotic women. <i>International Journal of Clinical Rheumatology</i> 2011;6(4):387-391.                                                                   | Wrong intervention                     |
| 595. | Wagner    | 2019   | Wagner, Frithjof; Augat, Peter; Varady, Patrick A.; Keiser, Silke; Panzer, Stephanie; Vach, Werner; Eckardt, Henrik. Daily subcutaneous Teriparatide injection increased bone mineral density of newly formed bone after tibia distraction osteogenesis, a randomized study. <i>Injury</i> 2019;50(8):1478-1482 | Wrong outcomes                         |
| 596. | Walling   | 1997   | Walling, A. D. Effect of alendronate in postmenopausal fractures. <i>American Family Physician</i> 1997;55(4):1420-1421                                                                                                                                                                                         | Conference abstract                    |
| 597. | Wan       | 2010   | Wan, X.; Kregge, J.. Teriparatide and risk of nonvertebral fractures in women with postmenopausal osteoporosis. <i>Journal of Bone and Mineral Research</i> 2010;1():S310.                                                                                                                                      | Conference abstract                    |
| 598. | Wang      | 2007   | Wang, Q.; Chen, D. C.. Ibandronate sodium for osteoporosis in postmenopausal women. <i>Cochrane Database of Systematic Reviews</i> 2007;(2) (no pagination)(CD006514)                                                                                                                                           | Systematic review and/or meta-analysis |
| 599. | Wang      | 2010   | Wang, Q.; Lu, C.; Zhang, L.; Deng, Q.; Wei, S.; Chen, D. Alendronate use prevents new vertebral compression fractures in osteoporotic patients after percutaneous vertebral augmentation. <i>Osteoporosis International</i> May 2010;1():S382                                                                   | Conference abstract                    |
| 600. | Wang      | 2015   | Wang, C.; Gu, M.; Fan, J.; Chen, J.; Zhang, G.; Li, B.. Parathyroid hormone plus alendronate in osteoporosis: A meta-analysis of randomized controlled trials. <i>Journal of Investigative Surgery</i> 02 Nov 2015;28(6):309-316                                                                                | Systematic review and/or meta-analysis |
| 601. | Wang      | 2017   | Wang, Y. K.; Qin, S. Q.; Ma, T.; Song, W.; Jiang, R. Q.; Guo, J. B.; Li, K.; Zhang, Y. M.. Effects of teriparatide versus alendronate for treatment of postmenopausal osteoporosis: A meta-analysis of randomized controlled trials. <i>Medicine</i> 2017;96(21):e6970.                                         | Systematic review and/or meta-analysis |
| 602. | Wang      | 2017 a | Wang, C.. Efficacy and Safety of Zoledronic Acid for Treatment of Postmenopausal Osteoporosis: A Meta-Analysis of Randomized Controlled Trials. <i>American Journal of Therapeutics</i> 2017;24(5):e544-e552.                                                                                                   | Systematic review and/or meta-analysis |
| 603. | Wang      | 2017 b | Wang, T.; Xuan, Z.; Li, R.; Song, L.; Dou, Y.; Ren, J.; Jia, X.; Lu, L.. Efficacy and safety of denosumab and teriparatide treatment for osteoporosis: A systematic review and meta-analysis. <i>International Journal of Clinical and Experimental Medicine</i> 2017;10(4):5949-5956.                          | Systematic review and/or meta-analysis |
| 604. | Wang      | 2017c  | Wang, G.; Sui, L.; Gai, P.; Li, G.; Qi, X.; Jiang, X. The efficacy and safety of vertebral fracture prevention                                                                                                                                                                                                  | Systematic review and/or meta-analysis |

| No.  | Authors | Year | Reference (extracted from covidence)                                                                                                                                                                                                                                                                                                                                                                                                                                                    | Reasons for exclusion                  |
|------|---------|------|-----------------------------------------------------------------------------------------------------------------------------------------------------------------------------------------------------------------------------------------------------------------------------------------------------------------------------------------------------------------------------------------------------------------------------------------------------------------------------------------|----------------------------------------|
|      |         |      | therapies in postmenopausal osteoporosis treatment: Which therapies work best? A network meta-analysis. Bone and Joint Research July 2017;6(7):452-463                                                                                                                                                                                                                                                                                                                                  |                                        |
| 605. | Watts   | 2003 | Watts, N. B.; Lindsay, R.; Li, Z.; Kasibhatla, C.; Brown, J.. Use of matched historical controls to evaluate the anti-fracture efficacy of once-a-week risedronate. Osteoporosis International 2003;14(5):437-41                                                                                                                                                                                                                                                                        | Wrong comparator                       |
| 606. | Watts   | 2004 | Watts, N. B.; Cooper, C.; Lindsay, R.; Eastell, R.; Manhart, M. D.; Barton, I. P.; van Staa, T. P.; Adachi, J. D.. Relationship between changes in bone mineral density and vertebral fracture risk associated with risedronate: greater increases in bone mineral density do not relate to greater decreases in fracture risk. Journal of Clinical Densitometry 2004;7(3):255-61                                                                                                       | Systematic review and/or meta-analysis |
| 607. | Watts   | 2010 | Watts, N. B.; Brown, J. P.; Cline, G.. Risedronate on 2 consecutive days a month reduced vertebral fracture risk at 1year compared with historical placebo. Journal of Clinical Densitometry 2010;13(1):56-62                                                                                                                                                                                                                                                                           | Wrong study design                     |
| 608. | Watts   | 2017 | Watts, N. B.; Fitzpatrick, L. A.; Williams, G. C.; Hattersley, G.; Wang, Y.; Miller, P. D.; Cosman, F.. Forearm bone mineral density and fracture incidence in postmenopausal women with osteoporosis: Results from the abaloparatide-SC phase 3 trial (ACTIVE). Endocrine Reviews. Conference: 99th Annual Meeting of the Endocrine Society, ENDO 2017;38(3 Supplement 1).                                                                                                             | Conference abstract                    |
| 609. | Watts   | 2018 | Watts, N. B.; Dore, R. K.; Baim, S.; Hattersley, G.; Williams, G.; Wang, Y.; Rozental, T. D.; LeBoff, M. S. Forearm bone mineral density and fracture incidence in postmenopausal women with osteoporosis. Arthritis and Rheumatology September 2018;70 (Supplement 9)():2546-2547                                                                                                                                                                                                      | Conference abstract                    |
| 610. | Wei     | 2021 | Wei, Kang; Qu, Yuxing; Gao, Yi; Ma, Yong. Comparison of Efficacy of Teriparatide (Parathyroid Hormone 1-34) Alone and in Combination with Zoledronic Acid for Osteoporosis in Postmenopausal Women. Journal of the College of Physicians and Surgeons--Pakistan : JCPSP 2021;31(2):240-242                                                                                                                                                                                              | Wrong patient population               |
| 611. | Weivoda | 2019 | Weivoda, Megan; Chew, Chee Kian; Monroe, David; Atkinson, Elizabeth; Farr, Josh; Thicke, Brianne; Ruan, Ming; Tweed, Amanda; Eckhardt, Brittany; McCready, Louise; Geske, Jennifer; Rizza, Robert; Vella, Adrian; Matveyenko, Aleksey; Drake, Matthew; Clarke, Bart; Oursler, Merry Jo; Khosla, Sundeep; Kassem, Moustapha; Andersen, Thomas. Identification of novel factors involved in the coupling of bone resorption and bone formation in humans reveals RANKL/DPP4 as a new link | Conference abstract, with no new data  |

| No.  | Authors     | Year | Reference (extracted from covidence)                                                                                                                                                                                                                                                                                                                       | Reasons for exclusion                                          |
|------|-------------|------|------------------------------------------------------------------------------------------------------------------------------------------------------------------------------------------------------------------------------------------------------------------------------------------------------------------------------------------------------------|----------------------------------------------------------------|
|      |             |      | between bone remodeling and energy metabolism. Journal of Bone and Mineral Research 2019;34(Supplement 1):17                                                                                                                                                                                                                                               |                                                                |
| 612. | Wen         | 2020 | Wen, Fei; Ding, Liangliang; Du, Hongheng; Hu, Jinxi; Huang, Zifeng; Huang, Hua; Li, Kaikai; Mo, Yuxia; Kuang, Anyin. Clinical efficacy and safety of drug interventions for primary and secondary prevention of osteoporotic fractures in postmenopausal women: Network metaanalysis followed by factor and cluster analysis. PloS one 2020;15(6):e0234123 | Systematic review and/or meta-analysis                         |
| 613. | Wimalawansa | 2000 | Wimalawansa, S. J.. Prevention and treatment of osteoporosis: efficacy of combination of hormone replacement therapy with other antiresorptive agents. Journal of Clinical Densitometry 2000;3(2):187-201                                                                                                                                                  | Wrong intervention                                             |
| 614. | Wu          | 2018 | Wu, J.; Zhang, Q.; Yan, G.; Jin, X.. Denosumab compared to bisphosphonates to treat postmenopausal osteoporosis: a meta-analysis. Journal of orthopaedic surgery and research 2018;13(1):194.                                                                                                                                                              | Systematic review and/or meta-analysis                         |
| 615. | Wustack     | 2010 | Wustrack, R.; Seeman, E.; Bucci-Rechtweg, C.; Palermo, L.; Black, D.. Impact of zoledronic acid on severe vertebral fractures: Results from horizon-pivotal fracture trial. Bone 2010;1():S194-S195.                                                                                                                                                       | Wrong outcomes                                                 |
| 616. | Wustack     | 2012 | Wustrack, R.; Seeman, E.; Bucci-Rechtweg, C.; Burch, S.; Palermo, L.; Black, D. M.. Predictors of new and severe vertebral fractures: results from the HORIZON Pivotal Fracture Trial. Osteoporosis International 2012;23(1):53-8.                                                                                                                         | Wrong study design                                             |
| 617. | Xie         | 2019 | Xie, Zhongjian; Chen, Yun; Gurbuz, Sirel; Zhang, Bin; Li, Yujie; Bai, Fan; Chen, Yu. Effects of teriparatide in Chinese and Caucasian women with osteoporosis: bridging study on efficacy. Clinical interventions in aging 2019;14():959-968                                                                                                               | Systematic review and/or meta-analysis and/ or pooled analysis |
| 618. | Xu          | 2016 | Xu, X. J.; Ma, D. D.; Lv, F.; Wang, J. Y.; Liu, Y.; Xia, W. B.; Jiang, Y.; Wang, O.; Xing, X. P.; Yu, W.; et al.,. THE CLINICAL CHARACTERISTICS AND EFFICACY OF BISPHOSPHONATES IN AUDLT PATIENTS WITH OSTEOGENESIS IMPERPECTA. Endocrine Practice 2016;22(11):1267-1276. [DOI: 10.4158/EP151184.OR]                                                       | Wrong patient population                                       |
| 619. | Xuan        | 2015 | Xuan, S.; Ma, J.; Liu, G. G.. Meta-analysis of efficacy and safety of denosumab in postmenopausal osteoporosis. Value in Health 2015;18 (3):A153.                                                                                                                                                                                                          | Systematic review and/or meta-analysis                         |
| 620. | Yang        | 2016 | Yang, X. C.; Deng, Z. H.; Wen, T.; Luo, W.; Xiao, W. F.; Zhao, R. B.; Li, Y. S. Network Meta-Analysis of Pharmacological Agents for Osteoporosis Treatment and Fracture Prevention. Cellular Physiology and Biochemistry 01 Dec 2016;40(3-4):781-795                                                                                                       | Systematic review and/or meta-analysis                         |
| 621. | Yang        | 2019 | Yang, L.; Kang, N.; Yang, J. C.; Su, Q. J.; Liu, Y. Z.; Guan, L.; Liu, T.; Meng, X. L.; Wang, Y.; Hai, Y.. Drug                                                                                                                                                                                                                                            | Systematic review and/or meta-analysis                         |

| No.  | Authors  | Year | Reference (extracted from covidence)                                                                                                                                                                                                                                                                                                                                                                      | Reasons for exclusion                  |
|------|----------|------|-----------------------------------------------------------------------------------------------------------------------------------------------------------------------------------------------------------------------------------------------------------------------------------------------------------------------------------------------------------------------------------------------------------|----------------------------------------|
|      |          |      | efficacies on bone mineral density and fracture rate for the treatment of postmenopausal osteoporosis: A network meta-analysis. European Review for Medical and Pharmacological Sciences 2019;23(6):2640-2668                                                                                                                                                                                             |                                        |
| 622. | Yang     | 2019 | Yang, L.; Kang, N.; Yang, J. C.; Su, Q. J.; Liu, Y. Z.; Guan, L.; Liu, T.; Meng, X. L.; Wang, Y.; Hai, Y. Drug efficacies on bone mineral density and fracture rate for the treatment of postmenopausal osteoporosis: a network meta-analysis. European review for medical and pharmacological sciences 2019;23(6):2640-2668                                                                              | Systematic review and/or meta-analysis |
| 623. | Yang     | 2020 | Yang, Chengzhi; Le, Guoping; Lu, Changwei; Wei, Renjie; Lan, Wanjie; Tang, Jingli; Zhan, Xinli. Effects of teriparatide compared with risedronate in the treatment of osteoporosis: A meta-analysis of randomized controlled trials. Medicine 2020;99(7):e19042                                                                                                                                           | Systematic review and/or meta-analysis |
| 624. | Yildirim | 2005 | Yildirim, K.; Gureser, G.; Karatay, S.; Melikoglu, M. A.; Ugur, M.; Erdal, A.; Senel, K.; Billen, H.. Comparison of the effects of alendronate, risedronate and calcitonin treatment in postmenopausal osteoporosis. Journal of Back and Musculoskeletal Rehabilitation 2005;18(3-4):85-89                                                                                                                | Wrong outcomes                         |
| 625. | Yu       | 2011 | Yu, S.; Burge, R. T.; Foster, S. A.; Gelwicks, S.; Meadows, E. S. The impact of teriparatide adherence and persistence on fracture outcomes. Osteoporosis International 2011;():1-11                                                                                                                                                                                                                      | Wrong study design                     |
| 626. | Yuan     | 2019 | Yuan, F.; Peng, W.; Yang, C.; Zheng, J.. Teriparatide versus bisphosphonates for treatment of postmenopausal osteoporosis: A meta-analysis. International journal of surgery 2019;16.                                                                                                                                                                                                                     | Systematic review and/or meta-analysis |
| 627. | Yuan     | 2019 | Yuan, Fei; Peng, Wen; Yang, Caihong; Zheng, Jinping. Teriparatide versus bisphosphonates for treatment of postmenopausal osteoporosis: A meta-analysis. International journal of surgery (London, England) 2019;66():1-11                                                                                                                                                                                 | Systematic review and/or meta-analysis |
| 628. | Yun      | 2021 | Yun, Jae Nam; Hoe, Kwang Lae; Kan, Hye-Su; Yeun, Ji-Sun; Kwon, In Sun; Kim, Jae-Hoon; Lee, Minyu; Kim, Namsick; Oh, Tae-Young; Nam, Seung-Kwan; Choi, Yoon Seok; Hong, Jang Hee. Bioequivalence for a Fixed-Dose Combination Formulation of Bazedoxifene and Cholecalciferol Compared With the Corresponding Single Entities Given Together. Clinical pharmacology in drug development 2021;10(8):850-858 | Wrong patient population               |
| 629. | Zerbini  | 2017 | Zerbini, C. A. F.; Geusens, P.; Lespessailles, E.; Body, J. J.; Casado, E.; Stepan, J.; Kendler, D. L.; Russo, L.; Greenspan, S. L.; Minisola, S.; Bagur, A.; Lakatos, P.; Fahrleitner-Pammer, A.; Moricke, R.; Lopez-Romero, P.; Marin, F.. Teriparatide compared with risedronate and the risk of clinical vertebral fractures: 2-year results of a randomized, double-                                 | Conference abstract                    |

| No.  | Authors | Year | Reference (extracted from covidence)                                                                                                                                                                                                                                                                                                                     | Reasons for exclusion                  |
|------|---------|------|----------------------------------------------------------------------------------------------------------------------------------------------------------------------------------------------------------------------------------------------------------------------------------------------------------------------------------------------------------|----------------------------------------|
|      |         |      | dummy clinical trial. Arthritis and Rheumatology. Conference: American College of Rheumatology/Association of Rheumatology Health Professionals Annual Scientific Meeting, ACR/ARHP 2017;69(Supplement 10).                                                                                                                                              |                                        |
| 630. | Zhang   | 2012 | Zhang, J.; Wang, R.; Zhao, Y. L.; Sun, X. H.; Zhao, H. X.; Tan, L.; Chen, D. C.; Hai-Bin, X.. Efficacy of intravenous zoledronic acid in the prevention and treatment of osteoporosis: A meta-analysis. Asian Pacific Journal of Tropical Medicine 2012;5(9):743-748.                                                                                    | Systematic review and/or meta-analysis |
| 631. | Zhang   | 2015 | Zhang, Q.; Qian, J.; Zhu, Y.. Parathyroid hormone plus alendronate in osteoporosis: A meta-analysis of randomized controlled trials. International Journal of Clinical and Experimental Medicine 2015;8(3):3338-3348.                                                                                                                                    | Retracted                              |
| 632. | Zhang   | 2017 | Zhang, Y.; Zhang, L.; Li, S.; Sun, F.; Li, J.; Ke, A.; Chen, X.; Zhang, X.; Xu, L.; Duan, J.; Zhang, G.; Li, D.; Ding, G.; Qin, L.; Wang, C.. Effect of denosumab, a fully human monoclonal antibody to RANKL, on bone mineral density and fractures: A meta-analysis. International Journal of Clinical and Experimental Medicine 2017;10(4):5931-5940. | Systematic review and/or meta-analysis |
| 633. | Zhang   | 2019 | Zhang, J.; Zhang, T.; Xu, X.; Cai, Q.; Zhao, D.. Zoledronic acid combined with percutaneous kyphoplasty in the treatment of osteoporotic compression fracture in a single T12 or L1 vertebral body in postmenopausal women. Osteoporosis International 01 Jul 2019;30(7):1475-1480                                                                       | Systematic review and/or meta-analysis |
| 634. | Zhou    | 2014 | Zhou, Z.; Chen, C.; Zhang, J.; Ji, X.; Liu, L.; Zhang, G.; Cao, X.; Wang, P. Safety of denosumab in postmenopausal women with osteoporosis or low bone mineral density: a meta-analysis. International journal of clinical and experimental pathology 2014;7(5):2113-2122                                                                                | Systematic review and/or meta-analysis |
| 635. | Zhou    | 2016 | Zhou, J.; Ma, X.; Wang, T.; Zhai, S.. Comparative efficacy of bisphosphonates in short-term fracture prevention for primary osteoporosis: a systematic review with network meta-analyses. Osteoporosis International 2016;27(11):3289-3300.                                                                                                              | Systematic review and/or meta-analysis |
| 636. | Zhou    | 2017 | Zhou, B.; Wang, J.; Seeman, E.; Chines, A.; Shi, Y.; Wang, A. T.; Guo, X. E.. Denosumab treatment in women with osteoporosis rapidly prevents deterioration in trabecular microstructure at the distal tibia. Journal of Bone and Mineral Research December 2017;32 (Supplement 1):S10-S11                                                               | Conference abstract                    |
| 637. | Zhou    | 2020 | Zhou, Jian; Liu, Bo; Qin, Ming-Zhao; Liu, Jin-Ping. Fall Prevention and Anti-Osteoporosis in Osteopenia Patients of 80 Years of Age and Older: A Randomized Controlled Study. Orthopaedic surgery 2020;12(3):890-899                                                                                                                                     | Wrong patient population               |

| No.  | Authors      | Year | Reference (extracted from covidence)                                                                                                                                                                                                                                                                                           | Reasons for exclusion                  |
|------|--------------|------|--------------------------------------------------------------------------------------------------------------------------------------------------------------------------------------------------------------------------------------------------------------------------------------------------------------------------------|----------------------------------------|
| 638. | Zhu          | 2020 | Zhu, Yilin; Huang, Zhonglian; Xu, Weicai; Chen, Hongjiang; Luo, Shaowei; Zhang, Yuantao; Zhao, Di; Hu, Jun; Wang, Yan; Xu, Jiankun. The efficacy and safety of denosumab in postmenopausal women with osteoporosis previously treated with bisphosphonates: A review. <i>Journal of Orthopaedic Translation</i> 2020;22():7-13 | Systematic review and/or meta-analysis |
| 639. | Not reported | 2017 | Efficacy of treatment with slow-release sodium fluoride versus alendronate on bone mineral density and fractures in postmenopausal women. <i>Journal of the American Geriatrics Society</i> 2017;Conference: 2017 Annual Scientific Meeting of the American Geriatrics Society. United States. 65(pp S111-S112):               | Conference abstract                    |

## S4 Table. Characteristics of included studies

Note: [Ordered by trial (when applicable), alphabetically and year of publication] The information hereby presented has been copied from the original article or adapted.

### General list

#### Adachi 2009

|                      |                                                                                                                                                                                                                                                                                                                                                                                                                                                                                                                                                                                                                                                                                                           |
|----------------------|-----------------------------------------------------------------------------------------------------------------------------------------------------------------------------------------------------------------------------------------------------------------------------------------------------------------------------------------------------------------------------------------------------------------------------------------------------------------------------------------------------------------------------------------------------------------------------------------------------------------------------------------------------------------------------------------------------------|
| <b>Methods</b>       | RCT, parallel group<br>34 centers in Canada and Columbia                                                                                                                                                                                                                                                                                                                                                                                                                                                                                                                                                                                                                                                  |
| <b>Participants</b>  | 438 women were randomized and 367 completed the study<br>Inclusion criteria: postmenopausal women (at least 6 months after their last menstrual period) and at least 40 years of age (or $\geq 25$ years if surgically menopausal). Patients were included if they had either a history of osteoporotic fracture or a bone mineral density $< 2.0$ SDs below the mean for young adults, as assessed using dual-energy X-ray absorptiometry performed within 3 years before randomization. Patients were required to have an adequate intake of vitamin D and calcium through diet and/or supplements, as determined by the study investigator based on information obtained during the screening process. |
| <b>Interventions</b> | Intervention: alendronate 10 mg, once daily for 12 weeks (N=291)<br>Control: placebo, once daily for 12 weeks (N=147)                                                                                                                                                                                                                                                                                                                                                                                                                                                                                                                                                                                     |
| <b>Outcomes</b>      | Non-vertebral fractures                                                                                                                                                                                                                                                                                                                                                                                                                                                                                                                                                                                                                                                                                   |

#### Adami 2008

|                      |                                                                                                                                                                                                                                                                                                                                                                                                                                                                                                                                                                                                                                                                                                                                                                                                                                                                                                                                                                                                                                                                                                                         |
|----------------------|-------------------------------------------------------------------------------------------------------------------------------------------------------------------------------------------------------------------------------------------------------------------------------------------------------------------------------------------------------------------------------------------------------------------------------------------------------------------------------------------------------------------------------------------------------------------------------------------------------------------------------------------------------------------------------------------------------------------------------------------------------------------------------------------------------------------------------------------------------------------------------------------------------------------------------------------------------------------------------------------------------------------------------------------------------------------------------------------------------------------------|
| <b>Methods</b>       | RCT, parallel group<br>32 clinical centers in seven countries (the United States, France, Germany, Spain, Italy, Canada, and Australia)                                                                                                                                                                                                                                                                                                                                                                                                                                                                                                                                                                                                                                                                                                                                                                                                                                                                                                                                                                                 |
| <b>Participants</b>  | Inclusion criteria: Ambulatory postmenopausal women 50 to 80 years of age who were at least 5 years postmenopausal that had a BMD T-score below $-2.5$ at the lumbar spine and/or the femoral neck.<br>Exclusion criteria: Women were excluded from the study if they had diseases other than osteoporosis which affected bone metabolism or responses to therapy or if they reported use of any of the following treatments at baseline: calcitonin within 2 months; estrogens, SERMs or tibolone within 3 months; $> 0.3$ mg conjugated estrogen or equivalent for more than three doses per week within 3 months; androgens or anabolic steroids within 6 months; fluorides within 2 years; oral bisphosphonates for more than 2 consecutive months within previous 6 months or intravenous bisphosphonates within 6 months; vitamin D $> 50,000$ IU/week or any use of calcitriol or vitamin D analogs within 6 months; systemic corticosteroids within 1 month or more than 30 days within previous 12 months; any drugs known to affect bone metabolism within 6 months; or investigational drugs within 1 month. |
| <b>Interventions</b> | Intervention: A one-month run-in period was followed by three consecutive one-year treatment phases. Patients received open-label recombinant teriparatide 20 $\mu$ g once-daily by subcutaneous self-injection in the first year. Then one year of raloxifene 60 mg/day as a tablet taken orally followed by one year of open label raloxifene 60 mg/day (N=157)                                                                                                                                                                                                                                                                                                                                                                                                                                                                                                                                                                                                                                                                                                                                                       |



Control: A one-month run-in period was followed by three consecutive one-year treatment phases. Patients received open-label recombinant teriparatide 20 µg once-daily by subcutaneous self-injection in the first year. Then one year of oral placebo as a tablet taken orally followed by one year of open-label raloxifene 60 mg/day (N=172)

**Outcomes** Clinical and non-vertebral fractures

#### Anastasilakis 2015

**Methods** RCT, parallel group  
Outpatient clinics in Greece

**Participants** N=64, from which 58 completed the study  
Inclusion criteria: Postmenopausal Caucasian women with low bone mass (bone mineral density [BMD] T-score of  $\leq -2.0$  at the lumbar spine [LS] and/or the non-dominant femoral neck [FN]) who had been subjected to a single zoledronic acid infusion for the first time 1 year ago were included in the study.  
Exclusion criteria: Exclusion criteria for both groups were as follows: (i) age <40 years; (ii) any bone and mineral disorder other than osteoporosis, including primary or secondary hyperparathyroidism, Paget's disease of bone, osteogenesis imperfecta, rheumatologic diseases, paraplegia, and chronic immobilization; (iii) severe liver or kidney disease (creatinine clearance <60 ml/min/1.73 m<sup>2</sup>) or liver or kidney transplantation; (iv) premature ovarian failure; (v) uncontrolled thyroid disease; (vi) any malignancy; (vii) any musculoskeletal injury or surgical procedure 6 months prior to baseline; (viii) dental surgery or tooth removal 3 months prior to baseline or plan to dental surgery; (ix) history or concomitant medications that could affect bone metabolism, including immunosuppressive, anticonvulsant, antiviral and anti-tuberculosis agents, addictive drugs, corticosteroids, non-steroidal anti-inflammatory drugs, amiodarone, thiazolidinediones, interferon, metronidazole, and tamoxifen.

**Interventions** Intervention 1: denosumab 60 mg, subcutaneous injections every 6 months (N=32)  
Intervention 2: zoledronic acid 5 mg, intravenous infusion (N=26)

**Outcomes** Clinical fractures

#### Ascott Evans 2003

**Methods** RCT, parallel group  
18 centers in 9 countries

**Participants** N=144, from which 119 women completed the study  
Intervention: 92.6% Caucasian  
Control: 89.8% Caucasian  
Inclusion criteria: Women were eligible for enrollment if they were younger than 80 years, had been postmenopausal for at least 3 years, had used HRT for at least 1 year, and had discontinued HRT within the 3 months preceding their joining the study. In addition, patients had to have a low bone density defined as a lumbar spine T score between -3.5 and -1.5 (approximately 1.5 to 3.5 SDs below the mean BMD for healthy young women).  
Exclusion criteria: Patients were excluded from participation if they had a history of other metabolic bone disease or osteoporotic fracture, or if they had recently received

|                      |                                                                                                      |
|----------------------|------------------------------------------------------------------------------------------------------|
|                      | bisphosphonate or other treatments (such as glucocorticoid therapy) known to affect bone metabolism. |
|                      | Treatment duration: 12 months                                                                        |
| <b>Interventions</b> | Intervention: alendronate sodium 10 mg per day (N=95)<br>Control: placebo, daily (N=49)              |
| <b>Outcomes</b>      | Vertebral, non-vertebral and hip fractures                                                           |

#### Barrett-Connor 2006

|                      |                                                                                                                                                                                                                                                                                                                                                                                                                                                                                                                                                                                                                                                                                                                                                                                                                                                                                                                                                                                                                                                                                                                                                                                        |
|----------------------|----------------------------------------------------------------------------------------------------------------------------------------------------------------------------------------------------------------------------------------------------------------------------------------------------------------------------------------------------------------------------------------------------------------------------------------------------------------------------------------------------------------------------------------------------------------------------------------------------------------------------------------------------------------------------------------------------------------------------------------------------------------------------------------------------------------------------------------------------------------------------------------------------------------------------------------------------------------------------------------------------------------------------------------------------------------------------------------------------------------------------------------------------------------------------------------|
| <b>Methods</b>       | RUTH (the Raloxifene Use for The Heart trial): a RCT, parallel group<br>177 sites in 26 countries<br>(ClinicalTrials.gov number, NCT00190593.)                                                                                                                                                                                                                                                                                                                                                                                                                                                                                                                                                                                                                                                                                                                                                                                                                                                                                                                                                                                                                                         |
| <b>Participants</b>  | 10101 women underwent randomization<br>Inclusion criteria: Eligible women were 55 years of age or older, were one year or more postmenopausal, and had established CHD or were at increased risk for CHD. Participants were required to have a cardiovascular risk score of 4 or more, according to a point system that takes into account the presence of the following14: established CHD (4 points), arterial disease of the leg (4 points), an age of at least 70 years (2 points), diabetes mellitus (3 points), cigarette smoking (1 point), hypertension (1 point), and hyperlipidemia (1 point).<br>Exclusion criteria: Exclusion criteria were a myocardial infarction, coronary-artery bypass grafting, or percutaneous coronary intervention within three months before randomization; a history of cancer or venous thromboembolism; a life expectancy of less than five years; unexplained uterine bleeding within six months before randomization; New York Heart Association class III or IV heart failure; chronic liver or renal disease; use of oral or transdermal estrogens within six months before randomization; or current use of other sex hormones or SERMs. |
| <b>Interventions</b> | Intervention: raloxifene 60 mg/d (N=5044)<br>Control: placebo, daily (N=5057)                                                                                                                                                                                                                                                                                                                                                                                                                                                                                                                                                                                                                                                                                                                                                                                                                                                                                                                                                                                                                                                                                                          |
| <b>Outcomes</b>      | Vertebral and non-vertebral                                                                                                                                                                                                                                                                                                                                                                                                                                                                                                                                                                                                                                                                                                                                                                                                                                                                                                                                                                                                                                                                                                                                                            |

#### Bell 2002

|                      |                                                                                                                                                                                                                                                                                                                                                                                                                                                                                                                                                                                                                                     |
|----------------------|-------------------------------------------------------------------------------------------------------------------------------------------------------------------------------------------------------------------------------------------------------------------------------------------------------------------------------------------------------------------------------------------------------------------------------------------------------------------------------------------------------------------------------------------------------------------------------------------------------------------------------------|
| <b>Methods</b>       | RCT, parallel group<br>8 institutions geographically distributed across the United States                                                                                                                                                                                                                                                                                                                                                                                                                                                                                                                                           |
| <b>Participants</b>  | N=65<br>Inclusion criteria: African-American postmenopausal women aged 45–88 yr, otherwise healthy, and a BMD 0.86 g/cm <sup>2</sup> or less (T score range -1.75 or less) at the lumbar spine as measured by model QDR 1000, QDR 1000W, or QDR 2000 bone densitometers (Hologic, Inc., Waltham, MA).<br>Exclusion criteria: women with any disease or drug therapy potentially affecting bone metabolism or who had had more than one fracture of a lumbar spine vertebra were excluded. Other exclusion criteria included abnormal renal function or a history of cancer or major upper gastrointestinal mucosal erosive disease. |
| <b>Interventions</b> | Treatment duration: 2 years<br>Intervention: alendronate 10 mg/day (N=33)                                                                                                                                                                                                                                                                                                                                                                                                                                                                                                                                                           |

|                 |                                |
|-----------------|--------------------------------|
|                 | Control: placebo, daily (N=32) |
| <b>Outcomes</b> | Clinical fractures             |

#### Bock 2012

|                      |                                                                                                                                                                                                                                                                                                                                                                                                                                                                                                                                                                                                                                                                                                                                                                                                                                                                                                                                                                                                                                                                                                                                                                                                                                                                                                                                                                                                                                                                                                                                                                                                                                                                                                                                                                |
|----------------------|----------------------------------------------------------------------------------------------------------------------------------------------------------------------------------------------------------------------------------------------------------------------------------------------------------------------------------------------------------------------------------------------------------------------------------------------------------------------------------------------------------------------------------------------------------------------------------------------------------------------------------------------------------------------------------------------------------------------------------------------------------------------------------------------------------------------------------------------------------------------------------------------------------------------------------------------------------------------------------------------------------------------------------------------------------------------------------------------------------------------------------------------------------------------------------------------------------------------------------------------------------------------------------------------------------------------------------------------------------------------------------------------------------------------------------------------------------------------------------------------------------------------------------------------------------------------------------------------------------------------------------------------------------------------------------------------------------------------------------------------------------------|
| <b>Methods</b>       | RCT, parallel group with 1-year follow-up period (clinical trial registration number NCT00271713; www.clinicaltrials.gov)                                                                                                                                                                                                                                                                                                                                                                                                                                                                                                                                                                                                                                                                                                                                                                                                                                                                                                                                                                                                                                                                                                                                                                                                                                                                                                                                                                                                                                                                                                                                                                                                                                      |
| <b>Participants</b>  | <p>Inclusion criteria: y women aged between 60 and 75 years, with menopause more than 5 years ago, measurable spine and hip BMD (e.g. no severe degenerative changes) by dual X-ray absorptiometry (DXA), spine (L1–L4) or total hip BMD <math>\leq -2.0</math> and <math>&gt; -3.5</math> SD T-score measured on DXA.</p> <p>Exclusion criteria: Exclusion criteria included spine or hip BMD <math>\leq -3.5</math> SD T-score as measured by DXA, vertebral fractures or multiple (<math>&gt;2</math>) low trauma peripheral fractures (as measured on lateral radiographs of thoracic and lumbar spine), diseases or disorders known to influence bone metabolism, a history of major upper gastro-intestinal disease, diagnosed malignant disease within the previous 10 years, previous treatment with a bisphosphonate at any time, treatment with fluoride for osteoporosis (dose greater than 10 mg/day) within the last 12 months or for more than 2 years (total duration), treatment with parathyroid hormone and similar agents or strontium ranelate at any time, treatment with other drugs affecting bone metabolism within the last 6 months, chronic systemic corticosteroid treatment, prior or current treatment with estrogens, progestins, SERMs, anabolic steroids, active vitamin D analogs/metabolites, calcitonin, calcineurin inhibitors or methotrexate, total serum calcium <math>&lt;2.2</math> mmol/l or <math>&gt;2.6</math> mmol/l, vitamin D deficiency (serum 25-hydroxyvitamin D <math>&lt;12</math> ng/ml), ALT above triple upper limit of normal range, renal impairment (serum creatinine <math>&gt;210</math> <math>\mu\text{mol/l}</math>) or any of the contraindications for ibandronate, calcium or vitamin D</p> |
| <b>Interventions</b> | <p>Intervention: 150 mg ibandronate oral monthly (N=36)</p> <p>Control: placebo oral monthly (N=34)</p> <p>All subjects received 500 mg calcium and 400 I.U. vitamin D daily.</p>                                                                                                                                                                                                                                                                                                                                                                                                                                                                                                                                                                                                                                                                                                                                                                                                                                                                                                                                                                                                                                                                                                                                                                                                                                                                                                                                                                                                                                                                                                                                                                              |
| <b>Outcomes</b>      | Vertebral and non-vertebral fractures                                                                                                                                                                                                                                                                                                                                                                                                                                                                                                                                                                                                                                                                                                                                                                                                                                                                                                                                                                                                                                                                                                                                                                                                                                                                                                                                                                                                                                                                                                                                                                                                                                                                                                                          |

#### Body 2002

|                     |                                                                                                                                                                                                                                                                                                                                                                                                                                                                                                                                                                                                                                                                                                                                                                                                                                                                                                                                                                                                                                                                                                            |
|---------------------|------------------------------------------------------------------------------------------------------------------------------------------------------------------------------------------------------------------------------------------------------------------------------------------------------------------------------------------------------------------------------------------------------------------------------------------------------------------------------------------------------------------------------------------------------------------------------------------------------------------------------------------------------------------------------------------------------------------------------------------------------------------------------------------------------------------------------------------------------------------------------------------------------------------------------------------------------------------------------------------------------------------------------------------------------------------------------------------------------------|
| <b>Methods</b>      | <p>RCT, parallel group</p> <p>12 sites in the United States, Austria, Belgium, Canada, Israel and Mexico</p>                                                                                                                                                                                                                                                                                                                                                                                                                                                                                                                                                                                                                                                                                                                                                                                                                                                                                                                                                                                               |
| <b>Participants</b> | <p>Inclusion criteria: Ambulatory postmenopausal women at least 5 yr past menopause were eligible to participate if they were aged 30 – 85 yr, free of severe or chronically disabling conditions other than osteoporosis, and had LS or femoral neck bone mineral density at least 2.5 SD below the mean for young adult women.</p> <p>Exclusion criteria: Women were excluded for metabolic bone disorders; diseases affecting bone and mineral metabolism; carcinomas within the previous 5 yr.; nephrolithiasis or urolithiasis within the previous 2 yr.; malabsorption; significantly impaired renal [serum creatinine concentrations, 177 mol/liter (2.0 mg/dl)] or hepatic function; abnormalities of the LS prohibiting assessment of bone mineral density at L2–L4; medications or drugs known to affect bone or mineral metabolism in the prior 2 – 24 months depending on the drug ( e.g. androgens, anabolic steroids, bisphosphonates, calcitonin, glucocorticoids, estrogens, fluoride); alcohol abuse; or allergy or previous exposure to teriparatide, exogenous PTH, or PTH analogs.</p> |

|                      |                                                                                                                                                                                                                 |
|----------------------|-----------------------------------------------------------------------------------------------------------------------------------------------------------------------------------------------------------------|
| <b>Interventions</b> | Treatment duration: 24 months<br>Intervention: once-daily subcutaneous injection teriparatide 40 µg plus oral placebo (N=73)<br>Control: once-daily placebo injection plus oral 10 mg alendronate sodium (N=73) |
| <b>Outcomes</b>      | Non-vertebral fractures                                                                                                                                                                                         |

#### Bone 1997

|                      |                                                                                                                                                                                                                                                                                                                                                                                                                                                                                                                                                                                                                                                                                                                                                                                                                                                                                                                                                                                                                                                                                                                                                                                                                                   |
|----------------------|-----------------------------------------------------------------------------------------------------------------------------------------------------------------------------------------------------------------------------------------------------------------------------------------------------------------------------------------------------------------------------------------------------------------------------------------------------------------------------------------------------------------------------------------------------------------------------------------------------------------------------------------------------------------------------------------------------------------------------------------------------------------------------------------------------------------------------------------------------------------------------------------------------------------------------------------------------------------------------------------------------------------------------------------------------------------------------------------------------------------------------------------------------------------------------------------------------------------------------------|
| <b>Methods</b>       | RCT, parallel group<br>15 clinical sites in the United States                                                                                                                                                                                                                                                                                                                                                                                                                                                                                                                                                                                                                                                                                                                                                                                                                                                                                                                                                                                                                                                                                                                                                                     |
| <b>Participants</b>  | Inclusion criteria: Subjects were required to be in generally good health apart from osteoporosis. Patients were accepted for entry if lumbar spine BMD was 0.824 g/cm <sup>2</sup> or less by Hologic DXA or 0.944 g/cm <sup>2</sup> or less by Lunar DXA. These densities correspond to 2.0 SD below mean peak levels.<br>Exclusion criteria: Potential subjects were excluded if they had more than 1 lumbar crush fracture or spinal anatomy was otherwise unsuitable for DXA analysis. They were also excluded if they had a history of recent major gastrointestinal disease, such as peptic ulcer, esophageal disorder, or malabsorption, or had recently used a drug to inhibit gastric acid secretion for more than 2 weeks. In addition, patients receiving chronic nonsteroidal anti-inflammatory therapy or agents known to affect bone metabolism (such as etidronate, estrogen, glucocorticoids, fluoride, or calcitonin) were excluded. Subjects receiving thyroid hormone replacement were required to have been on a stable dosage for at least 6 months before entry into the study and euthyroid by ultrasensitive TSH assay. Clinically significant vitamin D deficiency was similarly excluded or corrected. |
| <b>Interventions</b> | Treatment duration: 2 years<br>Intervention 1: alendronate 1.0 mg/day (N=86)<br>Intervention 2: alendronate 2.5 mg/day (N=89)<br>Intervention 3: alendronate 5.0 mg/day (N=93)<br>Control: placebo, daily (N=91)                                                                                                                                                                                                                                                                                                                                                                                                                                                                                                                                                                                                                                                                                                                                                                                                                                                                                                                                                                                                                  |
| <b>Outcomes</b>      | Vertebral and non-vertebral fractures                                                                                                                                                                                                                                                                                                                                                                                                                                                                                                                                                                                                                                                                                                                                                                                                                                                                                                                                                                                                                                                                                                                                                                                             |

#### Bone 2000

|                     |                                                                                                                                                                                                                                                                                                                                                                                                                                                                                                                                                                                                                                                                                                                                                                                                                                                                 |
|---------------------|-----------------------------------------------------------------------------------------------------------------------------------------------------------------------------------------------------------------------------------------------------------------------------------------------------------------------------------------------------------------------------------------------------------------------------------------------------------------------------------------------------------------------------------------------------------------------------------------------------------------------------------------------------------------------------------------------------------------------------------------------------------------------------------------------------------------------------------------------------------------|
| <b>Methods</b>      | 2 year RCT, parallel group<br>Multicenter                                                                                                                                                                                                                                                                                                                                                                                                                                                                                                                                                                                                                                                                                                                                                                                                                       |
| <b>Participants</b> | N=425, 92% Caucasians<br>Inclusion criteria: Entry criteria included prior hysterectomy and a lumbar spine BMD below 0.862 g/cm <sup>2</sup> for at least three evaluable vertebrae in the L1–L4 region, as measured by Hologic, Inc., densitometry equipment (Waltham, MA). Compared with the current reference range, the mean BMD (0.776 ± 0.07 g/cm <sup>2</sup> ) observed in the patients enrolled corresponds to a mean t score of -2.5 ± 0.2. The study was limited to women who had undergone hysterectomy to avoid any possible confounding effects of progestin therapy or withdrawal bleeding.<br>Exclusion criteria: Exclusion criteria included evidence of metabolic bone disease (other than postmenopausal osteoporosis), a low serum 25-hydroxyvitamin D concentration [ $<10$ ng/mL (25 nmol/L)], concomitant therapy with drugs that affect |

bone turnover (including bisphosphonates, calcitonin, or fluoride), renal insufficiency, severe cardiac disease, or history of recent major upper gastrointestinal mucosal erosive disease (including significant upper gastrointestinal bleeding, recurrent peptic ulcer disease, and esophageal or gastric varices). However, a history of other gastrointestinal diseases or chronic use of nonsteroidal anti-inflammatory agents were not considered reasons for exclusion. Women were not eligible for entry into the study if they had an underlying condition that would contraindicate randomization to estrogen, including active thrombophlebitis or history of prior thromboembolic disease, history of unexplained genital bleeding within the preceding year, increased risk for breast cancer, or fasting serum triglycerides more than 400 mg/dL. Women were also excluded from entering the study if within 6 months before entry into the study they had taken any form of systemic HRT.

**Interventions**  
 Intervention 1: alendronate (alendronate (10 mg/day) and placebo CEE) (N=92)  
 Intervention 2: CEE (CEE (0.625 mg/day) and placebo alendronate) (N=143)  
 Intervention 3: ALN + CEE (alendronate (10 mg/day) and CEE (0.625 mg/day)) (N=140)  
 Control: placebo (placebo alendronate/placebo conjugated equine estrogen) (N=50)

**Outcomes** Clinical fractures

#### Bone 2008

**Methods**  
 2-year RCT, phase 3 study  
 21 centers in Canada and United States

**Participants**  
 332 women enrolled in the study and 83% were white  
 286 completed the 24 months of treatment (86%)  
 Inclusion criteria: postmenopausal women with lumbar spine BMD T-scores between -1.0 and -2.5 who were: 1) ambulatory, 2) not receiving medication that affected bone metabolism (other than calcium and vitamin D supplements), 3) free from any underlying condition (other than low BMD) that might have resulted in abnormal bone metabolism, and 4) had no history of a fracture after the age of 25 years. Women who had taken oral bisphosphonates for less than 3 months were eligible. Those who had taken oral bisphosphonates for longer than 3 months but less than 3 yr cumulatively were eligible after a 12-month washout period.  
 Exclusion criteria: Women were excluded if they had received oral bisphosphonates for 3 or more yr, cumulatively; fluoride, or strontium ranelate within 5 yr. of study enrollment; or PTH or PTH derivatives, steroids, hormone replacement therapy, selective estrogen receptor modulators, tibolone, calcitonin, or calcitriol within 6 wk of study enrollment.

**Interventions**  
 Treatment duration: 2 years  
 Intervention: Denosumab 60 mg, subcutaneous injection every 6 months (N=142)  
 Control: placebo, subcutaneous injection every 6 months (N=144)

**Outcomes** Vertebral and non-vertebral fractures

#### Brown 2009

**Methods**  
 DECIDE (Determining Efficacy: Comparison of Initiating Denosumab versus Alendronate) trial: a phase-3 RCT, parallel group  
 Multicenter; Western Europe, North and South America, and Australia

|                      |                                                                                                                                                                                                                                                                                                                                                                                                                                                                                                                                                                                                                                                                                                                                                                                                                                                                                                                                                                                                                                                                                                                                                                                               |
|----------------------|-----------------------------------------------------------------------------------------------------------------------------------------------------------------------------------------------------------------------------------------------------------------------------------------------------------------------------------------------------------------------------------------------------------------------------------------------------------------------------------------------------------------------------------------------------------------------------------------------------------------------------------------------------------------------------------------------------------------------------------------------------------------------------------------------------------------------------------------------------------------------------------------------------------------------------------------------------------------------------------------------------------------------------------------------------------------------------------------------------------------------------------------------------------------------------------------------|
| <b>Participants</b>  | <p>1189 included in the study; 94% of them completed 12 months of study</p> <p>Inclusion criteria: Ambulatory postmenopausal women in general good health and with a T-score <math>\geq -2.0</math> at the proximal femur ("total hip") or lumbar spine by DXA were eligible. Subjects were required to have at least one hip and at least two vertebrae (L1–L4) that were evaluable by DXA.</p> <p>Exclusion criteria: exclusion criteria included prior administration of intravenous bisphosphonates, fluoride (except for dental treatment) or strontium; use of drugs with known bone activity within 3 mo of randomization; current enrollment in or <math>&lt;1</math> mo since completion of other drug trials; evidence of an active disease known to affect bone metabolism; malignancy within the past 5 yr (except basal or squamous cell carcinoma or cervical or breast cancer in situ); impaired renal function; or contraindications for alendronate therapy. Subjects with screening serum 25-hydroxyvitamin D [25(OH)D] concentrations <math>&lt;12</math> ng/ml were ineligible but could undergo vitamin D repletion with ergocalciferol for 2 wk. and be rescreened.</p> |
| <b>Interventions</b> | <p>Treatment duration: 12 months</p> <p>Intervention: 1 ml subcutaneous injection of denosumab 60 mg every 6 months plus an oral placebo tablet once weekly</p> <p>Control: 1 ml subcutaneous injection of placebo every 6 months plus oral branded alendronate 70 mg weekly</p>                                                                                                                                                                                                                                                                                                                                                                                                                                                                                                                                                                                                                                                                                                                                                                                                                                                                                                              |
| <b>Outcomes</b>      | Clinical and major osteoporotic fractures                                                                                                                                                                                                                                                                                                                                                                                                                                                                                                                                                                                                                                                                                                                                                                                                                                                                                                                                                                                                                                                                                                                                                     |

#### Brown 2021

|                      |                                                                                                                                                                                                                                                                                                                                                                                                                                                                                                                                                                                                                                                                                                                                                                            |
|----------------------|----------------------------------------------------------------------------------------------------------------------------------------------------------------------------------------------------------------------------------------------------------------------------------------------------------------------------------------------------------------------------------------------------------------------------------------------------------------------------------------------------------------------------------------------------------------------------------------------------------------------------------------------------------------------------------------------------------------------------------------------------------------------------|
| <b>Methods</b>       | <p>The Active-Controlled Fracture Study in Postmenopausal Women With Osteoporosis at High Risk (ARCH) trial (NCT01631214; <a href="https://clinicaltrials.gov/ct2/show/NCT01631214">https://clinicaltrials.gov/ct2/show/NCT01631214</a>): a phase 3, multi-center, international, randomized, active-controlled, double-blind study.</p>                                                                                                                                                                                                                                                                                                                                                                                                                                   |
| <b>Participants</b>  | <p>ARCH enrolled 4093 patients (2046 romosozumab, 2047 alendronate); 167 of these patients were enrolled in the ARCH imaging substudy (Supplemental Figure S4). Of the patients in the imaging substudy, 90 (49 romosozumab, 41 alendronate) participated.</p> <p>Inclusion criteria: postmenopausal women with low BMD (T-score<math>\leq -2.5</math>) and a prior fragility fracture.</p> <p>Exclusion criteria: Patients were ineligible for the ARCH imaging substudy if they experienced a nonvertebral fracture or clinical vertebral fracture within 6 months before enrollment or had non-evaluable vertebrae in the region of interest for spine QCT scans as assessed by the central imaging vendor at the time of screening, based on lateral spine x-rays.</p> |
| <b>Interventions</b> | <p>Double-blind treatment period: 12 months</p> <p>Intervention 1: monthly s.c. romosozumab 210 mg (N=49)</p> <p>Intervention 2: weekly oral alendronate 70 mg (N=41)</p> <p>After completion of the double-blind study period, all patients received open-label weekly oral alendronate 70 mg.</p>                                                                                                                                                                                                                                                                                                                                                                                                                                                                        |
| <b>Outcomes</b>      | Vertebral fractures                                                                                                                                                                                                                                                                                                                                                                                                                                                                                                                                                                                                                                                                                                                                                        |

#### Clemmesen 1997

|                |                     |
|----------------|---------------------|
| <b>Methods</b> | RCT, parallel group |
|----------------|---------------------|

---

2 sites: Copenhagen County, Denmark and Liège, Belgium

|                      |                                                                                                                                                                                                                                                                                                                                                                                                                                                                                                                                                                                                                                                                                                      |
|----------------------|------------------------------------------------------------------------------------------------------------------------------------------------------------------------------------------------------------------------------------------------------------------------------------------------------------------------------------------------------------------------------------------------------------------------------------------------------------------------------------------------------------------------------------------------------------------------------------------------------------------------------------------------------------------------------------------------------|
| <b>Participants</b>  | <p>N=132</p> <p>Inclusion criteria: otherwise healthy postmenopausal women, 53–81 years of age (mean age 68 years) and at least 1 year past the menopause, with established postmenopausal osteoporosis defined as at least one, but no more than four vertebral fractures, and at least three intact lumbar vertebrae.</p> <p>Exclusion criteria: None of the women had received estrogen or calcitonin treatment within the 6–12 months prior to entrance in the study or had ever received any kind of bisphosphonate or fluoride. All women were otherwise healthy with no secondary causes of osteoporosis. None of the women received medications with known influence on bone metabolism.</p> |
| <b>Interventions</b> | <p>Treatment duration: 2 year</p> <p>Intervention 1: risedronate 2.5 mg daily (N=44)</p> <p>Intervention 2: risedronate 2.5 mg daily for 2 weeks followed by 10 weeks on placebo (N=44)</p> <p>Control: placebo, daily (N=44)</p>                                                                                                                                                                                                                                                                                                                                                                                                                                                                    |
| <b>Outcomes</b>      | Vertebral and non-vertebral fractures                                                                                                                                                                                                                                                                                                                                                                                                                                                                                                                                                                                                                                                                |

#### Cosman 2001

|                      |                                                                                                                                                                                                                                                                                                                                                                                                                                                                                                                                                                                                                                                                                                                                                                                                  |
|----------------------|--------------------------------------------------------------------------------------------------------------------------------------------------------------------------------------------------------------------------------------------------------------------------------------------------------------------------------------------------------------------------------------------------------------------------------------------------------------------------------------------------------------------------------------------------------------------------------------------------------------------------------------------------------------------------------------------------------------------------------------------------------------------------------------------------|
| <b>Methods</b>       | <p>RCT, parallel group</p> <p>Osteoporosis clinic and osteoporosis screening program in the USA</p>                                                                                                                                                                                                                                                                                                                                                                                                                                                                                                                                                                                                                                                                                              |
| <b>Participants</b>  | <p>N=52</p> <p>Inclusion criteria: the presence of primary postmenopausal osteoporosis, defined as a T score of 2.5 below the normal premenopausal mean in either the spine or hip region and/or X-ray–documented osteoporotic vertebral fracture. Furthermore, all women had been on HRT for at least 1 year before study entry and were followed prospectively for 1 year to assure that bone density was stable. No patients were excluded because of bone loss. Consequently, all patients were on HRT for at least 2 years before randomization.</p> <p>Exclusion criteria: secondary causes of osteoporosis or medications (other than HRT) known to affect bone metabolism. Active renal calculus disease with a renal stone within the last 10 years or multiple prior renal stones.</p> |
| <b>Interventions</b> | <p>All patients were on HRT for at least 2 years before randomization.</p> <p>Treatment duration: 3 years</p> <p>Intervention: hormone-replacement therapy in addition to 400 IU/day (25 µg) of PTH(1–34) by subcutaneous daily injection. (N=27)</p> <p>Control: hormone-replacement therapy (N=5)</p>                                                                                                                                                                                                                                                                                                                                                                                                                                                                                          |
| <b>Outcomes</b>      | Clinical and vertebral fractures                                                                                                                                                                                                                                                                                                                                                                                                                                                                                                                                                                                                                                                                                                                                                                 |

#### Cosman 2005

|                     |                                                                                                     |
|---------------------|-----------------------------------------------------------------------------------------------------|
| <b>Methods</b>      | <p>RCT, parallel group</p> <p>Osteoporosis clinic and osteoporosis screening program in the USA</p> |
| <b>Participants</b> | N=126 women with osteoporosis who had been taking alendronate for at least 1 year were randomized.  |

Inclusion criteria: Normal levels of serum creatinine, total calcium (upper limit, 10.6 mg per deciliter [2.65 mmol per liter]), parathyroid hormone, and thyrotropin; normal liver function and complete blood count; and a ratio of urinary calcium to creatinine of less than 0.35 mg per milligram (1.0 mmol per millimole) after an overnight fast were prerequisites

Exclusion criteria: Exclusion criteria included rheumatoid arthritis, multiple prior renal stones or a kidney stone within the preceding five years, or current use of glucocorticoids, antiepileptic medications, or estrogen. Subjects were required to have a bone mineral density T score of  $-2.5$  or less at the lumbar spine (two or more vertebrae could be evaluated), femoral neck, or total hip or a T score of  $-2$  or less at any of these sites plus a history of fracture in adulthood (defined as an age of at least 40 years) or vertebral fracture (identified by radiography), but excluding fractures caused by trauma (motor vehicle accidents) and finger, toe, and skull fractures.

Treatment duration: 15 months

Intervention 1: daily subcutaneous parathyroid hormone 25  $\mu$ g plus alendronate 70 mg weekly (N=43)

**Interventions** Intervention 2: cyclic subcutaneous parathyroid hormone 25  $\mu$ g (each treatment cycle lasted three months and was followed by three months without parathyroid hormone) plus alendronate 70 mg weekly (N=40)

Intervention 3: alendronate 70 mg weekly (N=43)

**Outcomes** Vertebral, non-vertebral and hip fractures

## Cosman 2009

**Methods** Randomized open-label trial (ClinicalTrials.gov Identifier: NCT00079924)  
11 centers in the USA

**Participants** N=198, 84% completed the study

Inclusion criteria: Women were required to be postmenopausal and at least 50 yr old and to have had a previous diagnosis of osteoporosis based on fracture history and/or BMD. Women had to be on alendronate (70 total mg/wk.) or raloxifene (60 mg/d) for at least 18 months and be willing to continue or discontinue the alendronate or raloxifene, based on randomization, during the 18-month teriparatide treatment phase of the trial. Participants had to be on at least 1 month of stable calcium supplementation (at least 500 mg/d elemental calcium). At least two vertebrae in the lumbar region (L-1 through L-4) were required to be evaluable by DXA. A posterior-anterior lumbar spine BMD and/or hip BMD measurement via Hologic (Hologic Inc., Bedford, MA) or Lunar (GE Medical Systems, Madison, WI) densitometers equal to or lower than 2.0 SD values below the average bone mass for young women (BMD T-score  $\leq -2.0$ ) was required. Serum calcium values had to be within the normal range (8.9–10.1 mg/dl). Laboratory assessments including 25-hydroxyvitamin D, intact PTH, alkaline phosphatase, and TSH had to be normal or assessed as clinically insignificant.

Exclusion criteria: Women were excluded if they had a history of hypercalcemia (with the exception of surgically corrected hyperparathyroidism), metabolic bone diseases other than osteoporosis, secondary causes of osteoporosis, or malignant neoplasms within the past 5 yr. Women were also excluded if they had active urolithiasis within the past 2 yr or high risk for urolithiasis in the opinion of the investigator; prior radiation therapy involving the skeleton; active liver disease (liver enzymes more than three times upper limit of normal) or jaundice; substantially impaired renal function (serum creatinine  $> 1.8$  mg/dl); history of excessive alcohol consumption; or were treated with other bone-active drugs.



|                      |                                                                                                                                                                                                                                                                                                                                                                                                                                                                                                                                                                                                                                                                                                                                                                                                                                            |
|----------------------|--------------------------------------------------------------------------------------------------------------------------------------------------------------------------------------------------------------------------------------------------------------------------------------------------------------------------------------------------------------------------------------------------------------------------------------------------------------------------------------------------------------------------------------------------------------------------------------------------------------------------------------------------------------------------------------------------------------------------------------------------------------------------------------------------------------------------------------------|
|                      | <p>All postmenopausal women were treated with alendronate or raloxifene for at least 18 months before study entry.</p> <p>Treatment duration: 18 months</p> <p>Alendronate pretreated stratum</p> <p>Intervention 1: switch group – discontinue alendronate 10 mg/day or 70 mg/week and initiated teriparatide 20 µg by daily subcutaneous injection (N=50)</p> <p>Intervention 2: add group – continue alendronate 10 mg/day or 70 mg/week and initiated teriparatide 20 µg by daily subcutaneous injection (N=52)</p> <p>Raloxifene pretreated stratum</p> <p>Control 1: switch group – discontinue raloxifene 60 mg/day and initiated teriparatide 20 µg by daily subcutaneous injection (N=49)</p> <p>Control 2: add group – continue raloxifene 60 mg/day and initiated teriparatide 20 µg by daily subcutaneous injection (N=47)</p> |
| <b>Interventions</b> |                                                                                                                                                                                                                                                                                                                                                                                                                                                                                                                                                                                                                                                                                                                                                                                                                                            |
| <b>Outcomes</b>      | Clinical fractures                                                                                                                                                                                                                                                                                                                                                                                                                                                                                                                                                                                                                                                                                                                                                                                                                         |

#### Cosman 2011

|                      |                                                                                                                                                                                                                                                                                                                                                                                                                                                                                                                                                                                                                                                                                                                                                                                                                                                                                                                                                                                                                                                                    |
|----------------------|--------------------------------------------------------------------------------------------------------------------------------------------------------------------------------------------------------------------------------------------------------------------------------------------------------------------------------------------------------------------------------------------------------------------------------------------------------------------------------------------------------------------------------------------------------------------------------------------------------------------------------------------------------------------------------------------------------------------------------------------------------------------------------------------------------------------------------------------------------------------------------------------------------------------------------------------------------------------------------------------------------------------------------------------------------------------|
| <b>Methods</b>       | <p>1-year RCT, parallel group (ClinicalTrials.gov number, NCT00439244).</p> <p>Multicenter</p>                                                                                                                                                                                                                                                                                                                                                                                                                                                                                                                                                                                                                                                                                                                                                                                                                                                                                                                                                                     |
| <b>Participants</b>  | <p>N=412, the majority was white (96-98%).</p> <p>Inclusion criteria: Eligible participants were postmenopausal women aged 45 to 89 years with BMD T-scores of 2.5 or less at the femoral neck, total hip, or lumbar spine or a BMD T-score of 2.0 or less at any site plus one or more documented vertebral or nonvertebral fractures (not due to excessive trauma, as determined by individual investigators).</p> <p>Exclusion criteria: Women were excluded for any prior use of PTH or bisphosphonates for more than 3 consecutive months; shorter-term use was acceptable if followed by a 1-year washout. Other ineligibility criteria included prior strontium treatment; chronic use of systemic corticosteroids within the prior year; raloxifene, calcitonin, or hormone therapy within the prior 3 months; creatinine clearance &lt; 30 mL/min (assessed by estimated glomerular filtration rate [Cockcroft-Gault equation]); urine dipstick 2+ protein; serum calcium 2.75 mmol/L or &lt;2.0 mmol/L; or 25-hydroxyvitamin D levels &lt; 15 ng/mL.</p> |
| <b>Interventions</b> | <p>Intervention 1: single intravenous infusion of zoledronic acid 5mg plus daily teriparatide 20 µg via subcutaneous injection (N=137)</p> <p>Intervention 2: single intravenous infusion of zoledronic acid 5mg (N=137)</p> <p>Control: placebo infusion plus daily teriparatide 20 µg. (N=138)</p>                                                                                                                                                                                                                                                                                                                                                                                                                                                                                                                                                                                                                                                                                                                                                               |
| <b>Outcomes</b>      | Clinical fractures                                                                                                                                                                                                                                                                                                                                                                                                                                                                                                                                                                                                                                                                                                                                                                                                                                                                                                                                                                                                                                                 |

#### Cosman 2020

|                     |                                                                                                                                                                                                                                                                 |
|---------------------|-----------------------------------------------------------------------------------------------------------------------------------------------------------------------------------------------------------------------------------------------------------------|
| <b>Methods</b>      | <p>Post hoc analysis was based on the Active-Controlled Fracture Study in Postmenopausal Women With Osteoporosis at High Risk (ARCH) (Clinical TrialNCT01631214), a phase 3, multicenter, international, randomized, active-controlled, double-blind study.</p> |
| <b>Participants</b> | Inclusion criteria and Exclusion criteria: not provided. (Please see Brown 2021)                                                                                                                                                                                |

|                      |                                                                                                                                                                                                                                                                                                         |
|----------------------|---------------------------------------------------------------------------------------------------------------------------------------------------------------------------------------------------------------------------------------------------------------------------------------------------------|
| <b>Interventions</b> | <p>Double-blind treatment period: 12 months</p> <p>Intervention 1: monthly s.c. romosozumab 210 mg (N=1739)</p> <p>Intervention 2: weekly oral alendronate 70 mg (N=1726)</p> <p>After completion of the double-blind study period, all patients received open-label weekly oral alendronate 70 mg.</p> |
| <b>Outcomes</b>      | Clinical, vertebral, non-vertebral and hip fractures                                                                                                                                                                                                                                                    |

#### Downs Jr. 2000

|                      |                                                                                                                                                                                                                                                                                                                                                                                                                                                                                                                                                                                                                                                                                                                                                                                                                                                                                                                                                                                                                                                                                                                                                                                                                                                                                                                                                                                                                                                        |
|----------------------|--------------------------------------------------------------------------------------------------------------------------------------------------------------------------------------------------------------------------------------------------------------------------------------------------------------------------------------------------------------------------------------------------------------------------------------------------------------------------------------------------------------------------------------------------------------------------------------------------------------------------------------------------------------------------------------------------------------------------------------------------------------------------------------------------------------------------------------------------------------------------------------------------------------------------------------------------------------------------------------------------------------------------------------------------------------------------------------------------------------------------------------------------------------------------------------------------------------------------------------------------------------------------------------------------------------------------------------------------------------------------------------------------------------------------------------------------------|
| <b>Methods</b>       | <p>Prospective, randomized study</p> <p>Conducted at 24 centers across the United States</p>                                                                                                                                                                                                                                                                                                                                                                                                                                                                                                                                                                                                                                                                                                                                                                                                                                                                                                                                                                                                                                                                                                                                                                                                                                                                                                                                                           |
| <b>Participants</b>  | <p>97% women were Caucasian</p> <p>Inclusion criteria: ambulatory women at least 5 yr. post menopause with osteoporosis. Patients were required to have a BMD by dual-energy x-ray absorptiometry (DXA) at least 2 SD below the mean for a reference population of young women [based on the reference database provided by Hologic, Inc. (Waltham, MA)] at either the PA lumbar spine or femoral neck and, in addition, a BMD measurement at least 1 SD below the young normal mean at the other site. These criteria identify women who would be among the appropriate candidates for therapeutic intervention according to the National Osteoporosis Foundation guidelines. A history of a gastrointestinal disorder (other than an esophageal motility disorder) or use of a nonsteroidal anti-inflammatory agent was not a reason for exclusion.</p> <p>Exclusion criteria: Patients with a BMD more than 4 SD below the young normal mean at either the PA lumbar spine or femoral neck, a prevalent vertebral fracture on lateral thoracic or lumbar spine radiographs, or a history of minimal trauma hip fracture were excluded due to the use of a placebo in this study. Patients were also excluded for any of the following: active rheumatoid arthritis, disorders of bone mineralization, untreated hyperthyroidism, recent systemic estrogen therapy, hypercortisolism, or use of drugs known to alter bone or calcium metabolism.</p> |
| <b>Interventions</b> | <p>Half as many patients were randomized to the placebo group as were randomized to the alendronate and calcitonin groups (2:2:1, alendronate:calcitonin:placebo)</p> <p>Intervention 1: oral alendronate sodium (N=118)</p> <p>Intervention 2: open-label intranasal calcitonin-salmon (N=123)</p> <p>Control: matching alendronate placebo (N=58)</p>                                                                                                                                                                                                                                                                                                                                                                                                                                                                                                                                                                                                                                                                                                                                                                                                                                                                                                                                                                                                                                                                                                |
| <b>Outcomes</b>      | Clinical fractures                                                                                                                                                                                                                                                                                                                                                                                                                                                                                                                                                                                                                                                                                                                                                                                                                                                                                                                                                                                                                                                                                                                                                                                                                                                                                                                                                                                                                                     |

#### Dursun 2001

|                     |                                                                                                                                                                                                                                                                                                                                                                                                                                                                                                           |
|---------------------|-----------------------------------------------------------------------------------------------------------------------------------------------------------------------------------------------------------------------------------------------------------------------------------------------------------------------------------------------------------------------------------------------------------------------------------------------------------------------------------------------------------|
| <b>Methods</b>      | <p>RCT, parallel group</p> <p>Turkey</p>                                                                                                                                                                                                                                                                                                                                                                                                                                                                  |
| <b>Participants</b> | <p>151 participants included in the study</p> <p>Inclusion criteria: Postmenopausal women. Required to have a BMD of 2 SD or more below the young adult mean at either the posteroanterior lumbar spine or the femoral neck.</p> <p>Exclusion criteria: Women with a documented history of drug or alcohol abuse or with evidence from physical examinations, laboratory test or radiography of any bone metabolism disorder; active gastrointestinal or liver disease, renal failure, renal calculi,</p> |

|                      |                                                                                                                                                                                                                                                                                        |
|----------------------|----------------------------------------------------------------------------------------------------------------------------------------------------------------------------------------------------------------------------------------------------------------------------------------|
|                      | treatment with specific therapy for osteoporosis, treatment with systemic corticosteroid therapy, malignancy, disorder of calcium metabolism and lumbar vertebrae abnormalities preventing evaluation of BMD.                                                                          |
| <b>Interventions</b> | Participants were randomized to receive daily for 1 year one of this 3 treatments:<br>Intervention 1: oral alendronate 10 mg and calcium 1000 mg (N=51)<br>Intervention 2: intranasal salmon calcitonin 100 IU and oral calcium 1000 mg (N=50)<br>Control: oral calcium 1000 mg (N=50) |
| <b>Outcomes</b>      | Vertebral fractures                                                                                                                                                                                                                                                                    |

#### Ensrud 2008

|                      |                                                                                                                                                                                                                                                                                                                                                                                                                                                                                                                                                                                                                                                                                                    |
|----------------------|----------------------------------------------------------------------------------------------------------------------------------------------------------------------------------------------------------------------------------------------------------------------------------------------------------------------------------------------------------------------------------------------------------------------------------------------------------------------------------------------------------------------------------------------------------------------------------------------------------------------------------------------------------------------------------------------------|
| <b>Methods</b>       | RUTH (the Raloxifene Use for The Heart trial): a RCT, parallel group<br>Follow up: median of 5.6 years<br>177 sites in 26 countries                                                                                                                                                                                                                                                                                                                                                                                                                                                                                                                                                                |
| <b>Participants</b>  | Inclusion criteria: eligible women were $\geq 55$ yr of age, $\geq 1$ yr postmenopausal, and had established CHD or were at high risk for CHD.<br>Exclusion criteria: myocardial infarction, coronary-artery bypass grafting, or percutaneous coronary intervention within three months before randomization; a history of cancer or venous thromboembolism; a life expectancy of less than five years; unexplained uterine bleeding within six months before randomization; New York Heart Association class III or IV heart failure; chronic liver or renal disease; use of oral or transdermal estrogens within six months before randomization; or current use of other sex hormones or SERMs. |
| <b>Interventions</b> | Intervention: raloxifene 60 mg/d (N=5044)<br>Control: placebo, daily (N=5057)                                                                                                                                                                                                                                                                                                                                                                                                                                                                                                                                                                                                                      |
| <b>Outcomes</b>      | Vertebral and non-vertebral fractures                                                                                                                                                                                                                                                                                                                                                                                                                                                                                                                                                                                                                                                              |

#### Fogelman 2000

|                      |                                                                                                                                                                                                                                                                                                                                                                                                                                                                                                                                                                                                                                                                                                                                                                                                                                                                                                                                                                                                                                                      |
|----------------------|------------------------------------------------------------------------------------------------------------------------------------------------------------------------------------------------------------------------------------------------------------------------------------------------------------------------------------------------------------------------------------------------------------------------------------------------------------------------------------------------------------------------------------------------------------------------------------------------------------------------------------------------------------------------------------------------------------------------------------------------------------------------------------------------------------------------------------------------------------------------------------------------------------------------------------------------------------------------------------------------------------------------------------------------------|
| <b>Methods</b>       | RCT, parallel group<br>13 centers in France, UK, Netherlands, Belgium and Germany.                                                                                                                                                                                                                                                                                                                                                                                                                                                                                                                                                                                                                                                                                                                                                                                                                                                                                                                                                                   |
| <b>Participants</b>  | 543 women were enrolled; 355 completed 24 months of treatment<br>Inclusion criteria: Women up to 80 yr of age were eligible to participate in the study if they had been postmenopausal for at least 1 yr, based on the date of their last menstrual period, and had a mean lumbar spine (L1–L4) T-score of -2 or less. Prior or concomitant use of non-steroidal anti-inflammatory drugs (NSAIDs) or aspirin was permitted. Patients with previous or ongoing upper gastrointestinal disease were not excluded.<br>Exclusion criteria: Patients were excluded from the study if they had hyperparathyroidism, hyperthyroidism, or osteomalacia within a year before the study; a history of cancer; or abnormalities that would interfere with the measurement of lumbar spine BMD by dual-energy x-ray absorptiometry (DXA). Patients were also excluded if they had taken (within 6–12 months, depending on the medication) or were still taking treatment known to affect bone metabolism, including an injection of vitamin D $\geq 10,000$ IU. |
| <b>Interventions</b> | Treatment duration: 24 months; 2.5 mg group was discontinued by protocol amendment at 9 of the 13 centers                                                                                                                                                                                                                                                                                                                                                                                                                                                                                                                                                                                                                                                                                                                                                                                                                                                                                                                                            |

|                 |                                                                                                                                           |
|-----------------|-------------------------------------------------------------------------------------------------------------------------------------------|
|                 | Intervention 1: risedronate 2.5 mg per day (N=184)<br>Intervention 2: risedronate 5 mg per day (N=177)<br>Control: placebo, daily (N=180) |
| <b>Outcomes</b> | Vertebral and non-vertebral fractures                                                                                                     |

#### Freemantle 2012

|                      |                                                                                                                                                                                                                                                                                                                                                                                                                                                                                                                                                               |
|----------------------|---------------------------------------------------------------------------------------------------------------------------------------------------------------------------------------------------------------------------------------------------------------------------------------------------------------------------------------------------------------------------------------------------------------------------------------------------------------------------------------------------------------------------------------------------------------|
| <b>Methods</b>       | DAPS (the Denosumab Adherence Preference Satisfaction Trial): a RCT, crossover (registered in ClinicalTrials.gov under the identifier NCT00518531)<br>20 centers in the USA and 5 centers in Canada                                                                                                                                                                                                                                                                                                                                                           |
| <b>Participants</b>  | 250 women were enrolled in the study; 221 entered the 2 <sup>nd</sup> year<br>Inclusion criteria: Subjects enrolled were ambulatory, postmenopausal women, aged 55 years or older, with baseline BMD T-scores between -4.0 and -2.0 at the lumbar spine, total hip, or femoral neck as measured by dual energy X-ray absorptiometry.<br>Exclusion criteria: Key exclusion criteria were prior bisphosphonate or denosumab treatment, use of bone-active drugs, vitamin D deficiency (<20 ng/mL [49.9 nmol/L]), or contraindications to alendronate treatment. |
| <b>Interventions</b> | Treatment sequence 1: denosumab/alendronate - denosumab 60 mg every 6 months for 1 year during the 1 <sup>st</sup> year of the study, followed by alendronate 70 mg once a week for 1 year during the 2 <sup>nd</sup> year of the study (N=118)<br>Treatment sequence 2: alendronate/denosumab - alendronate 70 mg once a week for 1 year during the 1 <sup>st</sup> year of the study, followed by denosumab 60 mg every 6 months for 1 year during the 2 <sup>nd</sup> year of the study (N=125)                                                            |
| <b>Outcomes</b>      | Clinical fractures                                                                                                                                                                                                                                                                                                                                                                                                                                                                                                                                            |

#### Galesanu 2018

|                      |                                                                                                                                                                              |
|----------------------|------------------------------------------------------------------------------------------------------------------------------------------------------------------------------|
| <b>Methods</b>       | RCT, parallel group                                                                                                                                                          |
| <b>Participants</b>  | Inclusion criteria: Postmenopausal women with osteoporosis.<br>Exclusion criteria:                                                                                           |
| <b>Interventions</b> | Treatment duration: 2 years<br>Intervention: denosumab 60 mg, subcutaneously every 6 months (N=32)<br>Intervention 2: zoledronic acid 5 mg, intravenously once yearly (N=30) |
| <b>Outcomes</b>      | Clinical fractures                                                                                                                                                           |

#### Greenspan 1998

|                     |                                                                                                                                                                                                                                                                                                                                                                                                                  |
|---------------------|------------------------------------------------------------------------------------------------------------------------------------------------------------------------------------------------------------------------------------------------------------------------------------------------------------------------------------------------------------------------------------------------------------------|
| <b>Methods</b>      | RCT, parallel group<br>United States, Greater Boston areas                                                                                                                                                                                                                                                                                                                                                       |
| <b>Participants</b> | N=120<br>Inclusion criteria: unselected healthy, ambulatory, community-dwelling women age 65 years of age and older from the Greater Boston area via advertisement. Entry criteria were not based on BMD. The inclusion criteria for the present study were more relaxed, allowing for characteristic medical problems closer to those that exist in the general population of community-dwelling elderly women. |

|                      |                                                                                                                                                                                                                                                                                                                                                                                                                                                                                                            |
|----------------------|------------------------------------------------------------------------------------------------------------------------------------------------------------------------------------------------------------------------------------------------------------------------------------------------------------------------------------------------------------------------------------------------------------------------------------------------------------------------------------------------------------|
|                      | Exclusion criteria: Potential subjects were excluded if they had a history of any illness affecting bone and mineral metabolism (e.g., renal failure, hepatic failure, active malignancy, current hyperthyroidism or hyperparathyroidism, or malabsorption), were currently taking medications known to affect bone metabolism (e.g., glucocorticoids, anticonvulsants), or had been treated for osteoporosis with bisphosphonates, hormone replacement therapy, or calcitonin within 1 year of screening. |
| <b>Interventions</b> | Treatment duration: 2,5 years<br>Intervention: alendronate 5mg/day; in the last year of the study the dose was increased to 10 mg/day (N=60)<br>Control: placebo, daily (N=60)                                                                                                                                                                                                                                                                                                                             |
| <b>Outcomes</b>      | Non-vertebral and hip fractures                                                                                                                                                                                                                                                                                                                                                                                                                                                                            |

### Greenspan 2003

|                      |                                                                                                                                                                                                                                                                                                                                                                                                                                                                                                                                                                                                                                                                                                                                                                                                                                                                                                                                                                                                 |
|----------------------|-------------------------------------------------------------------------------------------------------------------------------------------------------------------------------------------------------------------------------------------------------------------------------------------------------------------------------------------------------------------------------------------------------------------------------------------------------------------------------------------------------------------------------------------------------------------------------------------------------------------------------------------------------------------------------------------------------------------------------------------------------------------------------------------------------------------------------------------------------------------------------------------------------------------------------------------------------------------------------------------------|
| <b>Methods</b>       | RCT, follow up: 3 years<br>United States, Greater Boston area (single-center)                                                                                                                                                                                                                                                                                                                                                                                                                                                                                                                                                                                                                                                                                                                                                                                                                                                                                                                   |
| <b>Participants</b>  | N=373<br>Inclusion criteria: community-dwelling women aged 65 or older.<br>Exclusion criteria: Participants were excluded if they had a history of illnesses that could affect bone mineral metabolism (e.g., current hyperthyroidism or hyperparathyroidism, renal failure, hepatic failure, and active malignancy) or if they were currently taking medications known to alter bone mineral metabolism (e.g., glucocorticoids, anticonvulsants, excess thyroid hormone). Participants were also excluded if they had been treated with osteoporosis medications (e.g., bisphosphonates, hormone replacement, or calcitonin) within a year of screening. In addition, women were excluded if they had any contraindications for hormone replacement or alendronate or had a baseline femoral neck BMD of 0.9 g/cm <sup>2</sup> or greater (i.e., zero SD of mean peak BMD using Hologic database prior to the Third National Health and Nutrition Examination Survey database <sup>10</sup> ). |
| <b>Interventions</b> | Intervention 1: alendronate + hormone replacement treatment placebo (N=93)<br>Intervention 2: alendronate + hormone replacement treatment (N=94)<br>Control 1: placebo (hormone replacement treatment placebo + alendronate placebo) (N=93)<br>Control 2: hormone replacement treatment + alendronate placebo (N=93)<br>Women received alendronate sodium, 10 mg/d, or matching placebo. For hormone replacement, women who had had a hysterectomy were given 0.625 mg/d of conjugated equine estrogen or matching placebo, and women with an intact uterus received conjugated equine estrogen, 0.625 mg/d, with medroxyprogesterone, 2.5 mg/d, or matching placebo.                                                                                                                                                                                                                                                                                                                           |
| <b>Outcomes</b>      | Clinical fractures                                                                                                                                                                                                                                                                                                                                                                                                                                                                                                                                                                                                                                                                                                                                                                                                                                                                                                                                                                              |

### Grey 2009

|                     |                                                                                                           |
|---------------------|-----------------------------------------------------------------------------------------------------------|
| <b>Methods</b>      | 2 year RCT, parallel group<br>New Zealand, conducted at an academic research center in a volunteer sample |
| <b>Participants</b> | N=50                                                                                                      |

|                      |                                                                                                                                                                                                                                                                                                                                                                                                                                                                                                                                                          |
|----------------------|----------------------------------------------------------------------------------------------------------------------------------------------------------------------------------------------------------------------------------------------------------------------------------------------------------------------------------------------------------------------------------------------------------------------------------------------------------------------------------------------------------------------------------------------------------|
|                      | <p>Inclusion criteria: Participants were women more than 5 yr postmenopausal, with bone mineral density (BMD) T score between 1 and 2 at either lumbar spine or total hip.</p> <p>Exclusion criteria: Women who had illnesses or were receiving therapies that were known to affect the skeleton were ineligible, as were those with low bone mass (BMD T score at lumbar spine or total hip <math>\geq 2</math>) or a previous hip or vertebral fracture, those who had ever used bisphosphonates, and those with any other major systemic disease.</p> |
| <b>Interventions</b> | <p>Intervention: zoledronate 5 mg, given as a 15-min iv infusion in 100ml 0.9% NaCl (N=25)</p> <p>Control: placebo (100 ml 0.9% NaCl, administered in an identical fashion) (N=25)</p>                                                                                                                                                                                                                                                                                                                                                                   |
| <b>Outcomes</b>      | Clinical fractures                                                                                                                                                                                                                                                                                                                                                                                                                                                                                                                                       |

### Grey 2012

|                      |                                                                                                                                                                                                                                                                                                                                                                                                                                                                                                                                                                                                                                                                                                                         |
|----------------------|-------------------------------------------------------------------------------------------------------------------------------------------------------------------------------------------------------------------------------------------------------------------------------------------------------------------------------------------------------------------------------------------------------------------------------------------------------------------------------------------------------------------------------------------------------------------------------------------------------------------------------------------------------------------------------------------------------------------------|
| <b>Methods</b>       | <p>RCT, parallel group</p> <p>New Zealand, clinical research facility in a tertiary medical center (<a href="https://www.anzctr.org.au/Trial/Registration/TrialReview.aspx?id=82391">https://www.anzctr.org.au/Trial/Registration/TrialReview.aspx?id=82391</a>)</p>                                                                                                                                                                                                                                                                                                                                                                                                                                                    |
| <b>Participants</b>  | <p>180 women were randomized</p> <p>Data from 172 women were included in the analysis</p> <p>Inclusion criteria: Participants were women more than 5 yr postmenopausal, with BMD T-score between 1 and 2.5 at either lumbar spine or total hip.</p> <p>Exclusion criteria: Women receiving antiresorptive therapies were ineligible, as were those with osteoporosis (BMD T-score at lumbar spine or total hip <math>\geq 2.5</math>), a previous hip fracture, clinical vertebral fracture, or postmenopausal wrist fracture, those who had ever used an aminobisphosphonate or had used etidronate within the past 3 yr, those with any major systemic illness, and those with serum 25(OH)D below 25 nmol/liter.</p> |
| <b>Interventions</b> | <p>Intervention 1: zoledronate 1 mg, 15-min iv infusion in 100ml 0.9% NaCl, followed for 12 months (N=43)</p> <p>Intervention 2: zoledronate 2.5 mg, 15-min iv infusion in 100ml 0.9% NaCl, followed for 12 months (N=43)</p> <p>Intervention 3: zoledronate 5 mg, 15-min iv infusion in 100ml 0.9% NaCl, followed for 12 months (N=43)</p> <p>Control: placebo, 100 ml 0.9% NaCl administered in an identical fashion (N=43)</p>                                                                                                                                                                                                                                                                                       |
| <b>Outcomes</b>      | Clinical and non-vertebral fractures                                                                                                                                                                                                                                                                                                                                                                                                                                                                                                                                                                                                                                                                                    |

### Hadji 2012

|                     |                                                                                                                                                                                                                                                                                                                                                                                                                                                                                                                    |
|---------------------|--------------------------------------------------------------------------------------------------------------------------------------------------------------------------------------------------------------------------------------------------------------------------------------------------------------------------------------------------------------------------------------------------------------------------------------------------------------------------------------------------------------------|
| <b>Methods</b>      | <p>RCT, parallel group</p> <p>78 clinical sites in 12 countries</p>                                                                                                                                                                                                                                                                                                                                                                                                                                                |
| <b>Participants</b> | <p>710 women started the treatment</p> <p>Inclusion criteria: Women <math>\geq 45</math> years of age and at least 2 years postmenopausal were eligible if they had a history of back pain for <math>\geq 2</math> months before screening that was likely, in the opinion of the investigator, to be caused by osteoporotic vertebral fracture, despite conservative analgesic treatment; a baseline mean pain score of at least 4.0 on the numeric rating scale during the week before randomization; lumbar</p> |

|                      |                                                                                                                                                                                                                                                                                                                                                                                                                                                                                                                                                                                                                                                                     |
|----------------------|---------------------------------------------------------------------------------------------------------------------------------------------------------------------------------------------------------------------------------------------------------------------------------------------------------------------------------------------------------------------------------------------------------------------------------------------------------------------------------------------------------------------------------------------------------------------------------------------------------------------------------------------------------------------|
|                      | <p>spine, femoral neck, or total hip bone mineral density (BMD) T-score of <math>\leq -2</math>; and a minimum of one moderate vertebral fracture.</p> <p>Exclusion criteria: Exclusion criteria included diseases affecting bone metabolism other than osteoporosis; elevated serum calcium values, abnormal serum thyroid-stimulating hormone, parathyroid hormone, or 25-hydroxyvitamin D levels; imminent need for kyphoplasty or vertebroplasty; and evidence of significant pathology related to back pain which would make the interpretation of the back pain related to an osteoporotic vertebral fracture difficult, based on investigator assessment</p> |
| <b>Interventions</b> | <p>Treatment duration: 18 months</p> <p>Intervention: daily teriparatide 20 <math>\mu\text{g}</math> subcutaneous (SQ) injections plus placebo tablet orally once weekly (N=360)</p> <p>Control: placebo SQ injections plus risedronate 35 mg orally once weekly (N=350)</p>                                                                                                                                                                                                                                                                                                                                                                                        |
| <b>Outcomes</b>      | Vertebral, non-vertebral and hip fractures                                                                                                                                                                                                                                                                                                                                                                                                                                                                                                                                                                                                                          |

#### Hooper 2005

|                      |                                                                                                                                                                                                                                                                                                                                                                                                                                                                                                                                                                                                                                                                                                                                                                                                                                                                                                                                                                                                                                                                                                                                                                                                                                                                                                               |
|----------------------|---------------------------------------------------------------------------------------------------------------------------------------------------------------------------------------------------------------------------------------------------------------------------------------------------------------------------------------------------------------------------------------------------------------------------------------------------------------------------------------------------------------------------------------------------------------------------------------------------------------------------------------------------------------------------------------------------------------------------------------------------------------------------------------------------------------------------------------------------------------------------------------------------------------------------------------------------------------------------------------------------------------------------------------------------------------------------------------------------------------------------------------------------------------------------------------------------------------------------------------------------------------------------------------------------------------|
| <b>Methods</b>       | <p>RCT, parallel group</p> <p>11 centers in Australia</p>                                                                                                                                                                                                                                                                                                                                                                                                                                                                                                                                                                                                                                                                                                                                                                                                                                                                                                                                                                                                                                                                                                                                                                                                                                                     |
| <b>Participants</b>  | <p>383 women were randomized</p> <p>Inclusion criteria: The protocol specified that all were to have been postmenopausal (as determined from their medical histories) for 6 to 36 months, with a serum follicle stimulating hormone concentration of at least 50 mIU/ml and a serum estradiol concentration of no more than 20 pg/ml. Menopause could be natural or surgical. Patients who had undergone hysterectomy without bilateral oophorectomy could be enrolled if they were 51–60 years of age. All patients were required to have a lumbar spine BMD T-score greater than - 2.5 (BMD greater than 0.76 g/cm<sup>2</sup> when measured with a Hologic densitometer (Waltham, Massachusetts, USA) or greater than 0.87 g/cm<sup>2</sup> when measured with a Lunar densitometer (Madison, Wisconsin, USA)). All patients were in good health and had no history of hyperparathyroidism, hyperthyroidism, or osteomalacia, or of treatment with agents that were likely to affect bone metabolism. Patients were not excluded because of previous or active gastrointestinal disease (including dysphagia, esophagitis, and esophageal, gastric, and duodenal ulceration), need for antisecretory therapy, or concomitant use of medications with potential to irritate the gastrointestinal tract.</p> |
| <b>Interventions</b> | <p>Treatment duration: 2 years</p> <p>Intervention 1: risedronate 2.5 mg/day (N=127)</p> <p>Intervention 2: risedronate 5 mg/day (N=129)</p> <p>Control: placebo (N=125)</p>                                                                                                                                                                                                                                                                                                                                                                                                                                                                                                                                                                                                                                                                                                                                                                                                                                                                                                                                                                                                                                                                                                                                  |
| <b>Outcomes</b>      | Vertebral and non-vertebral fractures                                                                                                                                                                                                                                                                                                                                                                                                                                                                                                                                                                                                                                                                                                                                                                                                                                                                                                                                                                                                                                                                                                                                                                                                                                                                         |

#### Hosking 1998

|                     |                                                                                                                                                                                 |
|---------------------|---------------------------------------------------------------------------------------------------------------------------------------------------------------------------------|
| <b>Methods</b>      | <p>2 year data from a RCT</p> <p>Multicentre in Europe and the United States</p>                                                                                                |
| <b>Participants</b> | <p>Inclusion criteria: To be eligible for the study they had to have been postmenopausal for at least six months (as confirmed by a high serum follicle-stimulating hormone</p> |

concentration) and in good health, with no clinical or laboratory evidence of systemic disease. To ensure that few women who entered the study had osteoporosis, only 10 percent of the women enrolled at each center were allowed to have a lumbar-spine bone mineral density below 0.8 g per square centimeter, as measured by dual-energy x-ray absorptiometry.

Exclusion criteria: The following were exclusion criteria: abnormal renal function (serum creatinine, >1.5 mg per deciliter [130 µmol per liter]), a history of cancer, peptic ulcer or esophageal disease requiring prescription medication within the previous five years, previous treatment with a bisphosphonate or fluoride, regular therapy with a phosphate-binding antacid, estrogen-replacement therapy within the previous three months, and therapy with any other drug that affects the skeleton.

There were two treatment strata. In the first, the women were randomly assigned to receive placebo or 2.5 mg or 5 mg of alendronate daily, with both the women and the investigator being unaware of treatment-group assignment, or open-label estrogen-progestin.

Women who had undergone hysterectomy or for whom estrogen-progestin was contraindicated (because of thromboembolic disease or a family history of estrogen-dependent cancer) or unacceptable were enrolled in the second stratum, which was identical to the first except that it did not include estrogen-progestin.

**Interventions**

In the United States the estrogen and progestin were given as conjugated estrogens (Premarin, Wyeth-Ayerst, Philadelphia, 0.625mg daily), and medroxyprogesterone acetate (Provera, Upjohn, Kalamazoo, Mich., 5 mg daily), respectively. In Europe the estrogen and progestin were given in a cyclical regimen (Trisequens, Novo Nordisk, Copenhagen, Denmark) of 2 mg of micronized estradiol per day for 22 days, 1 mg of norethindrone acetate per day on days 13 to 22, and 1 mg of estradiol per day on days 23 to 28. Dietary calcium intake was estimated at base line and annually during the study with a food-frequency questionnaire. Women with a calcium intake of less than 500 mg per day were advised to increase their intake. Supplements were not provided, because of the limited evidence of benefit in women soon after menopause.

**Outcomes**

Non-vertebral fractures

**Hosking 2003**

**Methods**

3 month RCT, parallel group  
Multicentre in Brazil and Europe

**Participants**

549 women were randomized; 99.5% Caucasian  
Inclusion criteria: Postmenopausal (at least 2 years) women ≥ 60 and ≤ 90 years of age with osteoporosis as defined by low BMD (lumbar spine or total hip BMD Tscore ≤ -2.5, or both lumbar spine and total hip BMD Tscore ≤ -2.0) were eligible. Patients with an oesophageal stricture, achalasia, or severe oesophageal motor dysfunction were excluded, while patients with other recent but controlled gastrointestinal mucosal erosive disease were eligible. Use of non-steroidal anti-inflammatory drugs and proton pump inhibitors was allowed.  
Exclusion criteria: Patients were excluded from the study if they had a history of any illness or if significant abnormalities were discovered during the prestudy clinical or laboratory evaluation that, in the opinion of the investigator, might compromise the patient's safety or the evaluation of the study results. Patients with osteoporosis, so severe that (in the judgment of the investigator) participation in a placebo-controlled trial was unethical, were excluded. Also excluded were patients with a baseline 25-hydroxyvitamin D level below 9 ng/ml, or below 15 ng/ml with biochemical evidence of osteomalacia: elevated parathyroid hormone or alkaline phosphatase or decreased



24-h urine calcium. Patients with an oesophageal stricture, achalasia, or severe oesophageal motor dysfunction were excluded. Metabolic and other bone diseases were also reasons for exclusion. Prior concomitant medications excluded were: oestrogen preparations (> 2 weeks within 6 months), thyroid hormone (for less than 6 weeks before the study or with abnormal thyroid stimulating hormone), fluoride (>1 mg/day), glucocorticoids (>1 month within 6 months), bisphosphonate (> 2 weeks), and supplemental calcium (except if ongoing for >4 weeks).

**Interventions** Intervention: risedronate 5 mg/day (N=222)  
 Intervention: alendronate 70 mg once a week (N=219)  
 Control: placebo (N=108)

**Outcomes** Clinical fractures

### Kendler 2010

**Methods** The STAND (Study of Transitioning from Alendronate to Denosumab) trial: a 1-year phase 3 RCT, parallel group  
 Multicenter, international

**Participants** 504 women were enrolled; 481 (95.4%) completed the 12 months follow-up  
 Inclusion criteria: Ambulatory postmenopausal women at least 55 years of age with a lumbar spine or total hip BMD measurements corresponding to a T-score of -2.0 or less and -4.0 or greater and who had been receiving alendronate treatment equivalent to 70 mg/week for at least 6 months.  
 Exclusion criteria: Women were excluded if they had current hyper- or hypothyroidism, current hyper- or hypoparathyroidism, elevated transaminases, significantly impaired renal function (creatinine clearance  $\leq 35$  mL/min as estimated by the Cockcroft and Gault method), hyper- or hypocalcemia, serum 25-hydroxyvitamin D levels  $< 20$  ng/mL ( $< 50$  nmol/L) or any other condition that could result in impaired calcium metabolism, or any metabolic bone disease that could interfere with interpretation of the findings. Women who were intolerant of alendronate therapy or for whom it was contraindicated or who had taken any bisphosphonate other than alendronate within 1 year of screening also were excluded. Women were excluded if they had ever received intravenous bisphosphonates, fluoride (except for dental treatment), or strontium ranelate; had received parathyroid hormone (PTH) or PTH derivatives within 1 year; had received any Selective Estrogen Receptor Modulator (SERM), anabolic steroids, systemic hormone replacement, calcitonin, calcitriol, or other vitamin D derivatives within 3 months; or had height, weight, or girth measurements that precluded accurate dual-energy x-ray absorptiometry (DXA) assessments.

**Interventions** Intervention: denosumab 60 mg, subcutaneous injections once every 6 months + placebo tablets once a week (N=253)  
 Control: alendronate 70 mg once a week + placebo subcutaneous injections every 6 months (N=251)

**Outcomes** Clinical fractures

### Kendler 2020

**Methods** Post hoc analysis focused on denosumab/alendronate sequence

|                      |                                                                                                                                                                                                                                                                                                                                                                                                                                                                                                                                               |
|----------------------|-----------------------------------------------------------------------------------------------------------------------------------------------------------------------------------------------------------------------------------------------------------------------------------------------------------------------------------------------------------------------------------------------------------------------------------------------------------------------------------------------------------------------------------------------|
|                      | Randomized, open-label, 2-year crossover Denosumab Adherence Preference Satisfaction (DAPS) study (NCT00518531).<br>25 study centers in the US and Canada                                                                                                                                                                                                                                                                                                                                                                                     |
| <b>Participants</b>  | Inclusion criteria: ambulatory postmenopausal women aged 55 years or older with baseline BMD T-scores from -4.0 to -2.0 at the lumbar spine (LS), total hip (TH), or femoral neck (FN), as measured using dual-energy x-ray absorptiometry (DXA).<br>Exclusion criteria: had received prior bisphosphonate or denosumab treatment or bone-acting drugs, including glucocorticoids. Additional exclusion criteria included hyper/hypocalcemia, vitamin D deficiency (< 20 ng/mL [49.9 nmol/L]), or contraindications to alendronate treatment. |
| <b>Interventions</b> | Treatment 1: Denosumab 60 mg every 6 months in the 1 <sup>st</sup> year and then crossed over to oral alendronate 70 mg once weekly in the 2 <sup>nd</sup> year (N=)<br>All participants received daily supplementation of calcium (1000 mg) and vitamin D (at least 400 IU).                                                                                                                                                                                                                                                                 |
| <b>Outcomes</b>      | Osteoporotic and non-vertebral fractures                                                                                                                                                                                                                                                                                                                                                                                                                                                                                                      |

#### Langdahl 2017

|                      |                                                                                                                                                                                                                                                                                                                                                                                                                                                                                                                                                                                                                                                                                                                                                                                                                                                                                                                                                                                                                                         |
|----------------------|-----------------------------------------------------------------------------------------------------------------------------------------------------------------------------------------------------------------------------------------------------------------------------------------------------------------------------------------------------------------------------------------------------------------------------------------------------------------------------------------------------------------------------------------------------------------------------------------------------------------------------------------------------------------------------------------------------------------------------------------------------------------------------------------------------------------------------------------------------------------------------------------------------------------------------------------------------------------------------------------------------------------------------------------|
| <b>Methods</b>       | STRUCTURE: a phase 3b, randomised, open-label, active-controlled, parallel-group trial.<br>46 sites (clinical practices, hospitals, and research centres) in North America, Latin America, and Europe                                                                                                                                                                                                                                                                                                                                                                                                                                                                                                                                                                                                                                                                                                                                                                                                                                   |
| <b>Participants</b>  | 436 patients were randomized<br>Inclusion criteria: Patients were ambulatory, postmenopausal women (aged ≥55 to ≤90 years at randomisation) who had received oral bisphosphonate therapy at a dose approved for postmenopausal osteoporosis for at least 3 years before screening, and alendronate (70 mg weekly or equivalent) the year immediately before screening. Patients had a history of non-vertebral fracture after age 50 years or vertebral fracture; osteoporosis as documented by an areal BMD T score of -2.5 or lower at the total hip, femoral neck, or lumbar spine on dual energy x-ray absorptiometry (DXA) scans; and at least one hip and at least two vertebrae in the L1–L4 region evaluable by DXA<br>Exclusion criteria: Patients were excluded from the study if they had recently used other agents affecting bone metabolism, had a serum 25hydroxyvitamin D concentration of less than 50 nmol/L, or had a history of metabolic or bone disease, or other disease or condition known to affect bone mass. |
| <b>Interventions</b> | Treatment duration: 12 months<br>Intervention: romosozumab 210 mg, 3 subcutaneous injections of 70 mg each (N=218)<br>Control: teriparatide 20 µg, self-administered, subcutaneously with a pen daily (N=218)                                                                                                                                                                                                                                                                                                                                                                                                                                                                                                                                                                                                                                                                                                                                                                                                                           |
| <b>Outcomes</b>      | Clinical and non-vertebral fractures                                                                                                                                                                                                                                                                                                                                                                                                                                                                                                                                                                                                                                                                                                                                                                                                                                                                                                                                                                                                    |

#### Lewiecki 2007

|                     |                                                                         |
|---------------------|-------------------------------------------------------------------------|
| <b>Methods</b>      | RCT, parallel group<br>29 centers in the USA                            |
| <b>Participants</b> | 412 women were randomized; 406 received at least one dose of study drug |

|                      |                                                                                                                                                                                                                                                                                                                                                                                                                                                                                                                                                                                                                                                                                                                                                                                                                                                                                                                                                                                                                                                                                                                                                                                                                                                                                                                                                                                                                   |
|----------------------|-------------------------------------------------------------------------------------------------------------------------------------------------------------------------------------------------------------------------------------------------------------------------------------------------------------------------------------------------------------------------------------------------------------------------------------------------------------------------------------------------------------------------------------------------------------------------------------------------------------------------------------------------------------------------------------------------------------------------------------------------------------------------------------------------------------------------------------------------------------------------------------------------------------------------------------------------------------------------------------------------------------------------------------------------------------------------------------------------------------------------------------------------------------------------------------------------------------------------------------------------------------------------------------------------------------------------------------------------------------------------------------------------------------------|
|                      | <p>Inclusion criteria: Postmenopausal women up to 80 yr of age were eligible if they had a BMD T-score of <math>-1.8</math> to <math>-4.0</math> at the lumbar spine or <math>-1.8</math> to <math>-3.5</math> at the femoral neck or total hip. An upper limit of <math>-1.8</math> was selected to include both osteopenic and osteoporotic populations.</p> <p>Exclusion criteria: Exclusion criteria included the use of bisphosphonates within 12 mo or fluoride within 24 mo; tibolone, PTH or any derivative, systemic glucocorticoids (<math>&gt;5</math> mg prednisone-equivalent daily for <math>&gt;10</math> days), inhaled glucocorticoids (<math>&gt;2000</math> g daily for <math>&gt;10</math> days), anabolic steroids, or testosterone within 6 mo; and estrogens, selective estrogen receptor modulators, calcitonin, or calcitriol within 3 mo of enrollment.</p> <p>Women with hyper- or hypoparathyroidism, hyper- or hypothyroidism, hypocalcemia, rheumatoid arthritis, Paget's disease of bone, osteomalacia, creatinine clearance <math>35</math> ml/min as determined using the Cockcroft-Gault equation, malabsorption syndrome, recent long-bone fracture (within 6 mo), more than one grade 1 vertebral fracture, or an osteoporosis-related fracture within the last 2 yr were excluded. Potential subjects were also excluded if BMD could not be measured accurately by DXA.</p> |
| <b>Interventions</b> | <p>Intervention 1: open-label alendronate 70 mg, orally once weekly (N=47)</p> <p>Intervention 2: denosumab 6, 14 or 30 mg, subcutaneously every 3 months or denosumab 14, 60,100 or 210 mg, subcutaneously every 6 mo, alternating with placebo (N=319)</p> <p>Control: placebo, subcutaneously every 3 months (N=46)</p>                                                                                                                                                                                                                                                                                                                                                                                                                                                                                                                                                                                                                                                                                                                                                                                                                                                                                                                                                                                                                                                                                        |
| <b>Outcomes</b>      | Clinical and major fractures                                                                                                                                                                                                                                                                                                                                                                                                                                                                                                                                                                                                                                                                                                                                                                                                                                                                                                                                                                                                                                                                                                                                                                                                                                                                                                                                                                                      |

#### Lindsay 1997

|                      |                                                                                                                                                                                                                                                                                                                                                                                                                                                                                                                                                                                                                                                                                                                                                                                                                            |
|----------------------|----------------------------------------------------------------------------------------------------------------------------------------------------------------------------------------------------------------------------------------------------------------------------------------------------------------------------------------------------------------------------------------------------------------------------------------------------------------------------------------------------------------------------------------------------------------------------------------------------------------------------------------------------------------------------------------------------------------------------------------------------------------------------------------------------------------------------|
| <b>Methods</b>       | <p>3 year RCT, parallel group</p> <p>United States</p>                                                                                                                                                                                                                                                                                                                                                                                                                                                                                                                                                                                                                                                                                                                                                                     |
| <b>Participants</b>  | <p>34 patients were randomized</p> <p>Inclusion criteria: The principal inclusion criterion was postmenopausal osteoporosis, defined as low bone mass (<math>&gt;2.5</math> SD below mean young normal values) or atraumatic fractures, or both. Patients were also required to have taken hormone-replacement therapy for more than 1 year and were followed up for 1 year prospectively to ensure that bone mass was stable.</p> <p>Exclusion criteria: Patients were excluded from the study if they had secondary osteoporosis or abnormal thyroid function (patients on thyroxine were included if thyroid-stimulating hormone was normal), renal and hepatic dysfunction, or a history of renal stones within the previous 10 years.</p>                                                                             |
| <b>Interventions</b> | <p>Participants completed an observation period of 1 year on oestrogens before randomization.</p> <p>Intervention: aminoterminal fragment of human PTH (1-34) plus oestrogens (N=17)</p> <p>Control: oestrogens (N=17)</p> <p>We used conjugated equine oestrogen (0.625 mg/day, Premarin, Wyeth-Ayerst, Philadelphia, PA, USA, n=30) or transdermal oestrogen (50 µg/day, Estraderm, Ciba-Geigg, Summit, NJ, USA, n=4). Patients who had had a hysterectomy (n=6, of whom two were in the PTH group) were not given a progestin. The remainder of the patients were prescribed medroxyprogesterone acetate 5–10 mg a day for at least 10 days per calendar month, or 2.5 mg a day continuously. hPTH (1–34) was given as a lyophilised powder, reconstituted with 1 mL 5% dextrose immediately before self-injection.</p> |
| <b>Outcomes</b>      | Clinical fractures                                                                                                                                                                                                                                                                                                                                                                                                                                                                                                                                                                                                                                                                                                                                                                                                         |

|                      |                                                                                                                                                                                                                                                                                                                                                                                                                                                                                                                                                                                                                                                                                                                                                                                                                                                                                                                                                                                                                                                                                                                                                                                                                                                                                                                                                                                                                                                                                                                                                                                                                                                                                                                                                                                                                                                                                                                                                                                                                                                                                                                                                                                                                                                                                                                                                                                                                                                                                                                                                                                                                                                                                                                                                                                                                                                                                                                   |
|----------------------|-------------------------------------------------------------------------------------------------------------------------------------------------------------------------------------------------------------------------------------------------------------------------------------------------------------------------------------------------------------------------------------------------------------------------------------------------------------------------------------------------------------------------------------------------------------------------------------------------------------------------------------------------------------------------------------------------------------------------------------------------------------------------------------------------------------------------------------------------------------------------------------------------------------------------------------------------------------------------------------------------------------------------------------------------------------------------------------------------------------------------------------------------------------------------------------------------------------------------------------------------------------------------------------------------------------------------------------------------------------------------------------------------------------------------------------------------------------------------------------------------------------------------------------------------------------------------------------------------------------------------------------------------------------------------------------------------------------------------------------------------------------------------------------------------------------------------------------------------------------------------------------------------------------------------------------------------------------------------------------------------------------------------------------------------------------------------------------------------------------------------------------------------------------------------------------------------------------------------------------------------------------------------------------------------------------------------------------------------------------------------------------------------------------------------------------------------------------------------------------------------------------------------------------------------------------------------------------------------------------------------------------------------------------------------------------------------------------------------------------------------------------------------------------------------------------------------------------------------------------------------------------------------------------------|
| <b>Methods</b>       | <p>EFFECT (Efficacy of Fosamax versus Evista Comparison Trial) study was a double-blind, randomized, active-controlled, multicenter study</p> <p>52 sites within the United States</p>                                                                                                                                                                                                                                                                                                                                                                                                                                                                                                                                                                                                                                                                                                                                                                                                                                                                                                                                                                                                                                                                                                                                                                                                                                                                                                                                                                                                                                                                                                                                                                                                                                                                                                                                                                                                                                                                                                                                                                                                                                                                                                                                                                                                                                                                                                                                                                                                                                                                                                                                                                                                                                                                                                                            |
| <b>Participants</b>  | <p>456 postmenopausal were enrolled</p> <p>Inclusion criteria:</p> <p>Postmenopausal women (18 months since last menstrual period), women older than 40 years (&gt; 25 years if surgically postmenopausal) with osteoporosis as defined by a low BMD (&gt; 2.0 SD below young normal mean bone mass for either PA lumbar spine (L1 to L4) or total hip). This corresponded to an absolute BMD of <math>\leq 0.835</math> g/cm<sup>2</sup> at the spine and <math>\leq 0.705</math> g/cm<sup>2</sup> at the total hip (Hologic) and <math>\leq 0.947</math> g/cm<sup>2</sup> at the spine and <math>\leq 0.747</math> g/cm<sup>2</sup> at the total hip (Lunar). This operational definition of osteoporosis is consistent with the U.S. Food and Drug Administration-approved product labeling of ALN and conforms to the current osteoporosis treatment guidelines set forth by the National Osteoporosis Foundation.<sup>2,12</sup> Participants were required to be in good general health, with spinal anatomy suitable for DXA of the lumbar spine.</p> <p>Exclusion criteria: Women were excluded from the study if they had a history of an illness or were found to have an abnormality during the prestudy, clinical, or laboratory evaluation that, in the opinion of the investigator, might compromise the person's safety or the evaluation of the study results. Specifically, women with any history of breast or uterine cancer, active or past history of venous thromboembolic events, including deep vein thrombosis, pulmonary embolism, or retinal vein thrombosis, were excluded from the study. Consistent with the respective product labels, women with a history of significant hepatic dysfunction (ALT <math>\geq 2</math> times the upper limit of normal) or women with abnormalities of the esophagus that delay esophageal emptying, such as esophageal stricture or achalasia, were also excluded. Hypocalcemia or metabolic bone diseases other than postmenopausal osteoporosis were also a reason for exclusion. Women were excluded if they had taken estrogen, estrogen analogues, selective estrogen receptor modulators (SERMs), anabolic steroids, bisphosphonates, or parathyroid hormone within 1 year of study entry. Exceptions to this rule included women who received estrogen therapy more than 3 months before study entry for less than 1 week or more than 6 months before study entry for less than 1 month. Topical (vaginal) estrogen cream (&lt; 2 g) used up to two times weekly was also permitted. Fluoride (&gt; 1 mg/day) at any time, and treatment with glucocorticoids for more than 1 month with more than 7.5 mg of oral prednisone (or equivalent) daily within 6 months before randomization were not allowed. Women treated with immunosuppressants or other medications that might alter bone or calcium metabolism were also excluded.</p> |
| <b>Interventions</b> | <p>Women were randomized to one of the two treatment groups:</p> <ol style="list-style-type: none"> <li>1) ALN70 mgOW(taken fasting with a full glass of water upon arising for the day, and while remaining in an upright position for 30 minutes before the first food or beverage of the day) and daily RLX-matching placebo, dosed as RLX below; or</li> <li>2) 2) RLX 60 mg daily (dosed at any time, without regard to food, as long as the dosing occurs at least 30 minutes after taking the OW dose) and ALN-matching placebo, dosed as ALN above.</li> </ol> <p>Based on the investigators' clinical assessment of individual participants' dietary calcium and vitamin D intake at baseline, women were instructed to take one or two</p>                                                                                                                                                                                                                                                                                                                                                                                                                                                                                                                                                                                                                                                                                                                                                                                                                                                                                                                                                                                                                                                                                                                                                                                                                                                                                                                                                                                                                                                                                                                                                                                                                                                                                                                                                                                                                                                                                                                                                                                                                                                                                                                                                              |

---

caplets of Os-Cal 500 + D daily (calcium 500 mg, vitamin D 200 IU) with the noon and/or evening meal.

**Outcomes** Clinical fractures (all non-vertebral)

---

#### Lufkin 1998

---

**Methods** RCT, parallel group  
United States - All of them were studied at the Mayo Clinic, Rochester, MN, or the Mayo Clinic, Scottsdale, AZ, including the women recruited at the Gundersen Clinic in La Crosse, WI, who were studied at the Mayo Clinic, Rochester.

**Participants** 143 women were randomized  
Inclusion criteria: Subjects were eligible if they were in good health except for osteoporosis, free of any serious acute or chronic medical condition that might affect bone or calcium metabolism, fully ambulatory, between the ages of 45 and 75 years, and postmenopausal (no menses for 5 years or levels of serum estradiol <73 pmol/l and serum follicle-stimulating hormone [FSH] >30 IU/l) The criteria for the diagnosis of osteoporosis were a bone mineral density (BMD) value for either the lumbar spine or proximal femur of  $\leq 10$ th percentile for normal premenopausal females and one or more non-traumatic vertebral fractures, defined as a decrease in vertical height of  $\geq 15\%$  compared with adjacent vertebrae. (Two women were inadvertently entered whose BMD values were slightly above the entry criteria.) Calcium supplements of  $\leq 500$  mg/day or vitamin D  $\leq 800$  IU/day were allowed. Patients with previous estrogen replacement therapy (ERT) or calcitonin therapy were accepted after a 6-month wash-out interval before enrollment, and, for larger dosages of calcium supplements or vitamin D supplements, after a 3-month washout interval.  
Exclusion criteria: Specific exclusion criteria included patients with a history of deep venous thrombosis, thromboembolic disorders, or cerebral vascular accident, also patients with a history of cancer within the previous 5 years, except for superficial skin cancer. Patients were ineligible if they had been previously treated with sodium fluoride or bisphosphonates.

**Interventions** Treatment duration: 12 months  
Intervention 1: raloxifene HCL 60 mg/day (N=48)  
Intervention 2: raloxifene HCL 120 mg/day (N=47)  
Control: placebo, daily (N=48)

**Outcomes** Vertebral, non-vertebral and hip fractures

---

#### Malouf-Sierra 2017

---

**Methods** Multinational, multicenter, prospective, randomized, active-controlled study  
Conducted from April 2009 to August 2015 across 17 countries in North America, Mexico, and Europe  
Public clinical trial registration: <http://clinicaltrials.gov/show/NCT00887354>

**Participants** Over 2400 patients were screened; 389 were enrolled.  
N (women) = missing  
Inclusion criteria: The study included men and postmenopausal women with low bone mass who had sustained a recent unilateral pertrochanteric fracture (Arbeitsgemeinschaft für Osteosynthesefragen [AO]/ Orthopaedic Trauma Association [OTA] types 31-A1 and 31-A2) and were treated with osteosynthesis with a sliding

---

|                      |                                                                                                                                                                                                                                                                                                                                                              |
|----------------------|--------------------------------------------------------------------------------------------------------------------------------------------------------------------------------------------------------------------------------------------------------------------------------------------------------------------------------------------------------------|
|                      | compression hip screw or a trochanteric intramedullary nail. Low bone mass was defined by a BMD T-score $\leq -2.0$ SDs at the total hip, femoral neck, or lumbar spine.                                                                                                                                                                                     |
| <b>Interventions</b> | Eligible patients were randomly assigned, within 2 weeks of osteosynthesis, in a 1:1 ratio to:<br>Intervention 1: teriparatide 20mg subcutaneous injection once daily plus oral placebo once weekly for 26 weeks (n= missing)<br>Intervention 2: placebo subcutaneous injection once daily plus oral risedronate 35 mg once weekly for 26 weeks (n= missing) |
| <b>Outcomes</b>      | Clinical and hip fractures                                                                                                                                                                                                                                                                                                                                   |

#### Masud 2009

|                      |                                                                                                                                                                                                                                                                                                                                                                                                                                                                                                                                                                                                                |
|----------------------|----------------------------------------------------------------------------------------------------------------------------------------------------------------------------------------------------------------------------------------------------------------------------------------------------------------------------------------------------------------------------------------------------------------------------------------------------------------------------------------------------------------------------------------------------------------------------------------------------------------|
| <b>Methods</b>       | The Hip Intervention Program (HIP): 3-year, double-blind, placebo-controlled, randomized study<br>Conducted between November 1993 and April 1998 at 183 study centers in Europe, North America, New Zealand, and Australia.<br>analysis focused on a subgroup of the intention-to-treat (ITT) population from the HIP study                                                                                                                                                                                                                                                                                    |
| <b>Participants</b>  | 9331 women enrolled in the original study, 6876 had available and evaluable vertebral fracture status of which 4702 had low BMD.<br>Eligible for this analysis: A total of 1656 women had low BMD and at least one prevalent vertebral fracture<br>Inclusion criteria: women aged 70 to 100 years with National Health and Nutrition Examination Survey (NHANES) III defined baseline femoral neck T-score of $\leq -2.5$ and at least one prior vertebral fracture consistent with the World Health Organization /International Osteoporosis Foundation criteria for established postmenopausal osteoporosis. |
| <b>Interventions</b> | Intervention: daily treatment with 2.5 mg or 5.0 mg risedronate (n=1090)<br>Control: identical-appearing placebo (n=566)                                                                                                                                                                                                                                                                                                                                                                                                                                                                                       |
| <b>Outcomes</b>      | Hip fracture                                                                                                                                                                                                                                                                                                                                                                                                                                                                                                                                                                                                   |

#### McClung 2001

|                     |                                                                                                                                                                                                                                                                                                                                                                                                                                                                                                                                                                                                                                                                                                                                                                                                                                                                                                                                                                                                                                                                                   |
|---------------------|-----------------------------------------------------------------------------------------------------------------------------------------------------------------------------------------------------------------------------------------------------------------------------------------------------------------------------------------------------------------------------------------------------------------------------------------------------------------------------------------------------------------------------------------------------------------------------------------------------------------------------------------------------------------------------------------------------------------------------------------------------------------------------------------------------------------------------------------------------------------------------------------------------------------------------------------------------------------------------------------------------------------------------------------------------------------------------------|
| <b>Methods</b>      | RCT, parallel group; mean follow-up of 2.3 years<br>183 study centers in North America, Europe, New Zealand, and Australia                                                                                                                                                                                                                                                                                                                                                                                                                                                                                                                                                                                                                                                                                                                                                                                                                                                                                                                                                        |
| <b>Participants</b> | N=9331<br>Inclusion criteria: One group consisted of women 70 to 79 years old who had osteoporosis, indicated by either a bone mineral density at the femoral neck (T score) that was more than 4 SD below the mean peak value in young adults (-4) or a femoral-neck T score lower than $\geq 3$ plus at least one risk factor for hip fracture. These risk factors (hereafter referred to as clinical risk factors) included difficulty standing from a sitting position, a poor tandem gait, a fall-related injury during the previous year, a psychomotor score of 5 or less on the Clifton Modified Gibson Spiral Maze test (a test of hand-eye coordination, with scores ranging from 1 to 12, where scores of 5 or less are considered to indicate an increased risk of falling), 16 current smoking or smoking during the previous five years, a maternal history of hip fracture, a previous hip fracture, and a hip-axis length of 11.1 cm or greater. The other group consisted of women 80 years of age or older who had at least one nonskeletal risk factor for hip |

|                      |                                                                                                                                                                                                                                                                                                                                                                                                                                                                                                                                                                                                                                                                                                                                                                                                                                        |
|----------------------|----------------------------------------------------------------------------------------------------------------------------------------------------------------------------------------------------------------------------------------------------------------------------------------------------------------------------------------------------------------------------------------------------------------------------------------------------------------------------------------------------------------------------------------------------------------------------------------------------------------------------------------------------------------------------------------------------------------------------------------------------------------------------------------------------------------------------------------|
|                      | <p>fracture, a femoral neck T score lower than -4, or a femoral-neck T score lower than -3 plus a hip-axis length of 11.1 cm or greater.</p> <p>Exclusion criteria: The exclusion criteria were any major medical illness, a recent history of cancer, another metabolic bone disease within the previous year, important abnormalities in the results of routine laboratory tests, recent use of drugs known to affect bone, allergy to any bisphosphonate, a history of bilateral hip fractures, and any physical or mental condition that would preclude participation in a clinical trial. There were no specific criteria for exclusion on the basis of previous or ongoing upper gastrointestinal tract disorders or concomitant use of non-steroidal anti-inflammatory drugs, aspirin, proton-pump inhibitors, or antacids.</p> |
| <b>Interventions</b> | <p>Treatment duration: a mean of 2.0 years</p> <p>Intervention: risedronate 2.5 mg or 5.0 mg, daily (N=6197)</p> <p>Control: placebo, daily (N=3134)</p>                                                                                                                                                                                                                                                                                                                                                                                                                                                                                                                                                                                                                                                                               |
| <b>Outcomes</b>      | Hip fractures                                                                                                                                                                                                                                                                                                                                                                                                                                                                                                                                                                                                                                                                                                                                                                                                                          |

#### McClung 2005

|                      |                                                                                                                                                                                                                                                                                                                                                                                                                                                                                                                                                                                                                                                                                                                                                                                                                                                                                                                                                                                                                                                                                                                                                                                                                                                                                                                                                                                                                                                                                                                                                                                   |
|----------------------|-----------------------------------------------------------------------------------------------------------------------------------------------------------------------------------------------------------------------------------------------------------------------------------------------------------------------------------------------------------------------------------------------------------------------------------------------------------------------------------------------------------------------------------------------------------------------------------------------------------------------------------------------------------------------------------------------------------------------------------------------------------------------------------------------------------------------------------------------------------------------------------------------------------------------------------------------------------------------------------------------------------------------------------------------------------------------------------------------------------------------------------------------------------------------------------------------------------------------------------------------------------------------------------------------------------------------------------------------------------------------------------------------------------------------------------------------------------------------------------------------------------------------------------------------------------------------------------|
| <b>Methods</b>       | <p>RCT, parallel group; 2-month screening phase and an 18-month treatment phase</p> <p>19 clinical sites globally</p>                                                                                                                                                                                                                                                                                                                                                                                                                                                                                                                                                                                                                                                                                                                                                                                                                                                                                                                                                                                                                                                                                                                                                                                                                                                                                                                                                                                                                                                             |
| <b>Participants</b>  | <p>N=203</p> <p>Inclusion criteria: Postmenopausal women with osteoporosis, 45 to 84 years of age. Subjects were ambulatory, 5 years or more past menopause, had a BMD T score between -2.5 and -4.0 at the lumbar spine or femoral neck, and had normal or clinically insignificant abnormal laboratory values, including serum calcium, PTH 1-84, 25-hydroxyvitamin D, and alkaline phosphatase.</p> <p>Exclusion criteria: Women were excluded if they had prior treatment with PTH or a PTH analogue; treatment with bisphosphonates within 12 months, anabolic corticosteroids or calcitriol or vitamin D analogues or agonists within 6 months, estrogens or selective estrogen receptor modulators within 3 months, or calcitonin within 2 months; therapeutic doses of fluoride; systemic corticosteroid use within 1 month or for more than 30 days in the prior year; use of anticoagulants within 1 month; history of diseases other than postmenopausal osteoporosis that affect bone metabolism; malignant neoplasms within 5 years; carcinoma in situ of the uterine cervix within 1 year; nephrolithiasis or urolithiasis within 2 years; abnormal uncorrected thyroid function; liver disease or clinical jaundice; impaired renal function; alcohol or other drug abuse; or poor medical or psychiatric risk for treatment. Patients with an increased risk of osteosarcoma (i.e., patients with Paget disease of bone, previous skeletal exposure to external beam radiotherapy, or previous malignant neoplasm involving the skeleton) were also excluded.</p> |
| <b>Interventions</b> | <p>Intervention 1: alendronate 10 mg/day, orally + injectable placebo (N=101)</p> <p>Intervention 2: oral placebo + teriparatide 20 µg (N=102)</p>                                                                                                                                                                                                                                                                                                                                                                                                                                                                                                                                                                                                                                                                                                                                                                                                                                                                                                                                                                                                                                                                                                                                                                                                                                                                                                                                                                                                                                |
| <b>Outcomes</b>      | Clinical fractures                                                                                                                                                                                                                                                                                                                                                                                                                                                                                                                                                                                                                                                                                                                                                                                                                                                                                                                                                                                                                                                                                                                                                                                                                                                                                                                                                                                                                                                                                                                                                                |

#### McClung 2006

|                     |                                                                 |
|---------------------|-----------------------------------------------------------------|
| <b>Methods</b>      | <p>Phase 2 RCT, parallel group</p> <p>29 centers in the USA</p> |
| <b>Participants</b> | 412 subjects were enrolled; 85% were white                      |

|                      |                                                                                                                                                                                                                                                                                                                                                                                                                                                                                                                                                                                                                                                                                                                                                                                                                                                                                                                                                                                                                                                                                                                                                                                                                                                                                                                                                                                                                                                                                                                                                                                                                  |
|----------------------|------------------------------------------------------------------------------------------------------------------------------------------------------------------------------------------------------------------------------------------------------------------------------------------------------------------------------------------------------------------------------------------------------------------------------------------------------------------------------------------------------------------------------------------------------------------------------------------------------------------------------------------------------------------------------------------------------------------------------------------------------------------------------------------------------------------------------------------------------------------------------------------------------------------------------------------------------------------------------------------------------------------------------------------------------------------------------------------------------------------------------------------------------------------------------------------------------------------------------------------------------------------------------------------------------------------------------------------------------------------------------------------------------------------------------------------------------------------------------------------------------------------------------------------------------------------------------------------------------------------|
|                      | <p>369 (90%) completed 12 months of treatment</p> <p>Inclusion criteria: Postmenopausal women up to 80 years of age were eligible if they had a bone mineral density T score of <math>-1.8</math> to <math>-4.0</math> at the lumbar spine or <math>-1.8</math> to <math>-3.5</math> at either the femoral neck or total hip. An upper limit of <math>-1.8</math> was selected to include subjects with both osteopenia and osteoporosis.</p> <p>Exclusion criteria: Exclusion criteria included the use of bisphosphonates within the previous 12 months or fluoride within the previous 24 months; tibolone, parathyroid hormone or any derivative, systemic glucocorticoids (more than 5 mg of prednisone equivalent daily for more than 10 days), inhaled glucocorticoids (more than 2000 <math>\mu\text{g}</math> daily for more than 10 days), anabolic steroids or testosterone within 6 months; and estrogens, selective estrogen receptor modulators, calcitonin, or calcitriol within 3 months before enrollment. Exclusion criteria included hyperparathyroidism or hypoparathyroidism, hyperthyroidism or hypothyroidism, hypocalcemia, rheumatoid arthritis, Paget's disease of bone, osteomalacia, a creatinine clearance of less than 35 ml per minute (as estimated by the Cockcroft–Gault equation),<sup>11</sup> malabsorption syndrome, a recent long-bone fracture (within the previous six months), more than one grade 1 vertebral fracture, an osteoporosis-related fracture within the previous two years, or a case in which bone mineral density could not be accurately measured.</p> |
| <b>Interventions</b> | <p>Intervention 1: denosumab, subcutaneously every three months (at a dose of 6, 14, or 30 mg) and subcutaneously every six months (at a dose of 14, 60, 100, or 210 mg) (N=319)</p> <p>Intervention 2: open-label alendronate 70 mg, orally once a week (N=47)</p> <p>Control: placebo (N=46)</p>                                                                                                                                                                                                                                                                                                                                                                                                                                                                                                                                                                                                                                                                                                                                                                                                                                                                                                                                                                                                                                                                                                                                                                                                                                                                                                               |
| <b>Outcomes</b>      | Vertebral and non-vertebral fractures                                                                                                                                                                                                                                                                                                                                                                                                                                                                                                                                                                                                                                                                                                                                                                                                                                                                                                                                                                                                                                                                                                                                                                                                                                                                                                                                                                                                                                                                                                                                                                            |

#### McClung 2009

|                      |                                                                                                                                                                                                                                                                                                                                                                                                                                                                                                                                                                                                                                                                                                                                                                                                                                                                                                                                                                                                                                                 |
|----------------------|-------------------------------------------------------------------------------------------------------------------------------------------------------------------------------------------------------------------------------------------------------------------------------------------------------------------------------------------------------------------------------------------------------------------------------------------------------------------------------------------------------------------------------------------------------------------------------------------------------------------------------------------------------------------------------------------------------------------------------------------------------------------------------------------------------------------------------------------------------------------------------------------------------------------------------------------------------------------------------------------------------------------------------------------------|
| <b>Methods</b>       | <p>1-year RCT, parallel group</p> <p>10 centers in the United States</p>                                                                                                                                                                                                                                                                                                                                                                                                                                                                                                                                                                                                                                                                                                                                                                                                                                                                                                                                                                        |
| <b>Participants</b>  | <p>N=160</p> <p>Inclusion criteria: postmenopausal women aged 45 – 60 years with baseline mean lumbar spine (LS) BMD T -score between <math>-1.0</math> and <math>-2.5</math> (L2 – L4) and baseline T -score <math>N - 2.5</math> in 3 regions of the proximal femur: the total hip (TH), trochanter (TR) and femoral neck (FN).</p> <p>Exclusion criteria: Women with prevalent vertebral fractures (as assessed by lateral X-ray of T4 – L4) or previous low-trauma osteoporotic fractures were excluded, as were patients receiving systemic hormones (including estrogens, progestins, selective estrogen receptor modulators [SERMs], anabolic steroids, active vitamin D analogs/metabolites, and calcitonin). Additional major exclusions included: severe renal failure (defined as a calculated glomerular filtration rate [GFR] <math>\leq 30</math> mL/min), malignancy, diseases that impact bone metabolism, treatment with bisphosphonates within the previous 2 years, and history of major upper gastrointestinal disease.</p> |
| <b>Interventions</b> | <p>Intervention: 150 mg monthly oral ibandronate (N=77)</p> <p>Control: monthly oral placebo (N=83)</p>                                                                                                                                                                                                                                                                                                                                                                                                                                                                                                                                                                                                                                                                                                                                                                                                                                                                                                                                         |
| <b>Outcomes</b>      | Clinical fractures                                                                                                                                                                                                                                                                                                                                                                                                                                                                                                                                                                                                                                                                                                                                                                                                                                                                                                                                                                                                                              |



## McClung 2014

|                      |                                                                                                                                                                                                                                                                                                                                                                                                                                                                                                                                                                                                                                                                                                                                                                                                                                                                                                                                                                                                                                                                                                                                                                                                                                                                                                                                                                                                                                                                                                                                                                                                                                                                                                                                                                                           |
|----------------------|-------------------------------------------------------------------------------------------------------------------------------------------------------------------------------------------------------------------------------------------------------------------------------------------------------------------------------------------------------------------------------------------------------------------------------------------------------------------------------------------------------------------------------------------------------------------------------------------------------------------------------------------------------------------------------------------------------------------------------------------------------------------------------------------------------------------------------------------------------------------------------------------------------------------------------------------------------------------------------------------------------------------------------------------------------------------------------------------------------------------------------------------------------------------------------------------------------------------------------------------------------------------------------------------------------------------------------------------------------------------------------------------------------------------------------------------------------------------------------------------------------------------------------------------------------------------------------------------------------------------------------------------------------------------------------------------------------------------------------------------------------------------------------------------|
| <b>Methods</b>       | Phase 2 RCT, parallel group<br>28 study centers in Argentina, Austria, Belgium, Canada, Denmark, Spain, and the United States                                                                                                                                                                                                                                                                                                                                                                                                                                                                                                                                                                                                                                                                                                                                                                                                                                                                                                                                                                                                                                                                                                                                                                                                                                                                                                                                                                                                                                                                                                                                                                                                                                                             |
| <b>Participants</b>  | 419 participants were randomized; 383 (91%) completed the 12 month visit; 86% were white<br>Inclusion criteria: Ambulatory postmenopausal women, 55 to 85 years of age, were eligible if they had low bone mineral density (a T score of -2.0 or less at the lumbar spine, total hip, or femoral neck and -3.5 or more at each of the three sites).<br>Exclusion criteria: A history of vertebral fracture or a fragility fracture of the wrist, humerus, hip, or pelvis after 50 years of age; a history of metabolic bone disease; a serum level of 25-hydroxyvitamin D of less than 20 ng per milliliter; untreated hyperthyroidism or hypothyroidism; current hyperparathyroidism or hypoparathyroidism; an elevated aminotransferase level; substantially impaired renal function (estimated creatinine clearance, $\leq 30$ ml per minute, as assessed by means of the Modification of Diet in Renal Disease equation 14); current hypercalcemia or hypocalcemia; cancer; a positive test for the human immunodeficiency virus, hepatitis C virus, or hepatitis B surface antigen; and a history of spinal stenosis, facial-nerve paralysis, or solid-organ or one marrow transplantation. In addition, the use of any of the following agents affecting bone metabolism was an exclusion criterion: intravenous bisphosphonate or denosumab at any time; fluoride (for treatment of osteoporosis) within the previous 24 months; oral bisphosphonate, parathyroid hormone, or strontium within the previous 12 months; calcitonin, selective estrogen-receptor modulator, systemic oral or transdermal estrogen, or tibolone within the previous 3 months; or systemic glucocorticoid ( $\geq 5$ mg of prednisone equivalent per day for $>10$ days) within the previous 3 months. |
| <b>Interventions</b> | Intervention 1: alendronate 70 mg, weekly (N=51)<br>Intervention 2: teriparatide 20 $\mu$ g, daily (N=55)<br>Intervention 3: romosozumab 140 mg or 210 mg every 3 months or 70 mg, 140 mg or 210 mg monthly (N=261)<br>Control: placebo, monthly or every 3 months (N=52)                                                                                                                                                                                                                                                                                                                                                                                                                                                                                                                                                                                                                                                                                                                                                                                                                                                                                                                                                                                                                                                                                                                                                                                                                                                                                                                                                                                                                                                                                                                 |
| <b>Outcomes</b>      | Non-vertebral fractures                                                                                                                                                                                                                                                                                                                                                                                                                                                                                                                                                                                                                                                                                                                                                                                                                                                                                                                                                                                                                                                                                                                                                                                                                                                                                                                                                                                                                                                                                                                                                                                                                                                                                                                                                                   |

## McClung 2020

|                     |                                                                                                                                                                                                                                                                                                                                                                                                                                                                                                                                                                                                                                                                                                                                                                                                                                                                                  |
|---------------------|----------------------------------------------------------------------------------------------------------------------------------------------------------------------------------------------------------------------------------------------------------------------------------------------------------------------------------------------------------------------------------------------------------------------------------------------------------------------------------------------------------------------------------------------------------------------------------------------------------------------------------------------------------------------------------------------------------------------------------------------------------------------------------------------------------------------------------------------------------------------------------|
| <b>Methods</b>      | Phase 2, international, multicenter, randomized, placebo-controlled, dose-finding, parallel-group study.<br>The study was registered as a clinical trial with registration identification ClinicalTrials.gov NCT00896532.                                                                                                                                                                                                                                                                                                                                                                                                                                                                                                                                                                                                                                                        |
| <b>Participants</b> | Inclusion criteria: Postmenopausal women aged 55 to 85 years with a low BMD (T-score of $\leq -2.0$ and $\geq -3.5$ at the lumbar spine, total hip, or femoral neck).<br>Exclusion criteria: Key exclusion criteria were a history of metabolic bone disease; a history of vertebral fracture or a fragility fracture of the wrist, humerus, hip, or pelvis at $> 50$ years of age; a serum level of 25-hydroxyvitamin D of less than 20 ng/mL; untreated hypothyroidism or hyperthyroidism; current hypoparathyroidism or hyperparathyroidism; current hypocalcemia or hypercalcemia; substantially impaired renal function (i.e., estimated creatinine clearance $\leq 30$ mL/min as assessed by the Modification of Diet in Renal Disease equation [1]); an elevated aminotransferase level; a positive test for hepatitis C virus, hepatitis B surface antigen, or the human |

immunodeficiency virus; cancer; and a history of spinal stenosis, facial-nerve paralysis, or solid-organ or bone marrow transplantation. Additionally, the use of any of the following agents affecting bone metabolism led to exclusion from the study: intravenous denosumab or bisphosphonate at any time; fluoride (for treatment of osteoporosis) within the previous 24 months; oral bisphosphonate, parathyroid hormone, or strontium within the previous 12 months; selective estrogen-receptor modulator, systemic oral or transdermal estrogen, tibolone, or calcitonin, within the previous 3 months; or systemic glucocorticoid ( $\geq 5$  mg of prednisone equivalent per day for  $> 10$  days) within the previous 3 months.

**For study period from baseline to 48 months:** Subjects who received various romosozumab doses or placebo from months 0–24 were rerandomized to denosumab (60 mg SC Q6M) or placebo for 12 months, followed by open-label romosozumab (210 mg QM) for 12 months.

#### Interventions

**The present paper presents data for the study period from 48 to 72 months - Zoledronate Follow-on period:** At month 48, subjects who had received active treatment for 48 months were assigned to no further active treatment (N=51) and all other subjects were assigned to zoledronate 5 mg IV (N=90).

|                 |                                                                                               |
|-----------------|-----------------------------------------------------------------------------------------------|
| <b>Outcomes</b> | Clinical vertebral fractures, adjudicated atypical femoral fractures and fragility fractures. |
|-----------------|-----------------------------------------------------------------------------------------------|

#### McClung 2021

|                      |                                                                                                                                                                                                                                                                                                                                                                                                                                                                                                                                                                                                                                                    |
|----------------------|----------------------------------------------------------------------------------------------------------------------------------------------------------------------------------------------------------------------------------------------------------------------------------------------------------------------------------------------------------------------------------------------------------------------------------------------------------------------------------------------------------------------------------------------------------------------------------------------------------------------------------------------------|
| <b>Methods</b>       | International, multicenter, randomized, placebo-controlled, parallel-group study and its extensions<br>(NCT00896532; <a href="https://www.clinicaltrials.gov/ct2/show/NCT00896532">https://www.clinicaltrials.gov/ct2/show/NCT00896532</a> )                                                                                                                                                                                                                                                                                                                                                                                                       |
| <b>Participants</b>  | Inclusion criteria: postmenopausal women 55 to 85 years old with low bone mass (T-score of $\leq 2.0$ and $\geq 3.5$ at the lumbar spine, total hip, or femoral neck)<br>Exclusion criteria: not reported in this paper.                                                                                                                                                                                                                                                                                                                                                                                                                           |
| <b>Interventions</b> | In this analysis, we report the results from a subset of women who were randomized to receive placebo for 24 months, re-randomized to receive denosumab or placebo for 12 months, and then received romosozumab for 12 months. This provides two treatment groups: one that received romosozumab after 3 years of placebo (Group 1; n = 12) and the second group that received placebo for 2 years, then denosumab for 12 months followed by 12 months of treatment with romosozumab (Group 2; n = 16) (Figure 1B). Only data from the 28 subjects who entered the month 36 to month 48 romosozumab treatment period are included in the analyses. |
| <b>Outcomes</b>      | Atypical femoral fractures                                                                                                                                                                                                                                                                                                                                                                                                                                                                                                                                                                                                                         |

#### Miller 2008

|                     |                                                                                                                                                                                                                                                                                                                                                                                                                          |
|---------------------|--------------------------------------------------------------------------------------------------------------------------------------------------------------------------------------------------------------------------------------------------------------------------------------------------------------------------------------------------------------------------------------------------------------------------|
| <b>Methods</b>      | RCT, parallel group<br>101 sites in Canada, Europe and the United States                                                                                                                                                                                                                                                                                                                                                 |
| <b>Participants</b> | 1583 women were randomized; 470 (29.7%) discontinued treatment<br>Inclusion criteria: Enrolled subjects were generally healthy women 45 yr of age who were at least 1 yr postmenopausal (i.e., completed their last natural menstrual cycle or underwent bilateral oophorectomy, with or without hysterectomy, at least 1 yr before screening). Women were stratified into two strata based on time since menopause: (1) |

women who were 1–5 yr. postmenopause and (2) those who were >5 yr. postmenopause. Women who were postmenopausal between 1 and 5 yr had to have at least one of the following risk factors for osteoporosis to be enrolled: lumbar spine or femoral neck BMD T-scores between –1.0 and –2.5 as measured by DXA, a family history of fracture, bilateral oophorectomy, current history of smoking, small-boned and/or thin frame (weight < 58 kg), inadequate intake of calcium, and little or no weight-bearing exercise. Women in the latter stratum who previously received hormone replacement therapy but had discontinued treatment for 6 mo or women who were surgically postmenopausal for <5 yr were required to have accompanying serum follicle-stimulating hormone (FSH) levels 40 IU/liter and estradiol levels ≤73.4 pM (20 pg/ml). Women who were postmenopausal for >5 yr had to have the following inclusion criteria: lumbar spine or femoral neck BMD T-scores between –1.0 and –2.5 in addition to one of the following risk factors: a family history of fracture, bilateral oophorectomy, menopause occurring at ≤40 yr of age, current history of smoking, small-boned and/or thin frame (weight < 58 kg), inadequate intake of calcium, and little or no weight-bearing exercise.

Exclusion criteria: Women were excluded at screening if they had other forms of bone disease, conditions that could invalidate BMD testing, at least one osteoporotic vertebral fracture shown on thoracolumbar radiographs, history of or active nontraumatic venous thromboembolic event, endometrial hyperplasia based on biopsy or endometrial thickness of >5 mm on transvaginal ultrasound, abnormal vaginal bleeding, history of malignancy within the previous 10 yr, abnormal laboratory tests including abnormal liver function tests or elevated fasting total cholesterol or triglyceride levels (310 or 300 mg/dl, respectively), and abnormal physical findings including body mass index (BMI) >32.2 kg/m<sup>2</sup> or elevations in blood pressure. Subjects were also ineligible if they received treatment with any of the following medications: a bisphosphonate within 2 yr. of screening; PTH, a SERM, or an estrogen-, androgen-, or progestin-containing medication within 6 mo of screening; calcitonin or systemic fluoride for >1 mo within 6 mo of screening; a systemic corticosteroid (equivalent to 10 mg of prednisone for >10 days) within 6 mo of screening; and any investigational drug within 60 days of randomization.

|                      |                                            |
|----------------------|--------------------------------------------|
| <b>Interventions</b> | Intervention 1: bazedoxifene 10 mg (N=321) |
|                      | Intervention 2: bazedoxifene 20 mg (N=322) |
|                      | Intervention 3: bazedoxifene 40 mg (N=319) |
|                      | Intervention 4: raloxifene 60 mg (N=311)   |
|                      | Control: placebo (N=310)                   |
| <b>Outcomes</b>      | Clinical fractures                         |

### Miller 2016b

|                     |                                                                                                                                                                                                                                                                                                                                                                                                                                                                                                                                           |
|---------------------|-------------------------------------------------------------------------------------------------------------------------------------------------------------------------------------------------------------------------------------------------------------------------------------------------------------------------------------------------------------------------------------------------------------------------------------------------------------------------------------------------------------------------------------------|
| <b>Methods</b>      | 12 month RCT, parallel group                                                                                                                                                                                                                                                                                                                                                                                                                                                                                                              |
|                     | 37 study centers in Belgium, Denmark, Poland, Spain, Canada, the United States, and Australia                                                                                                                                                                                                                                                                                                                                                                                                                                             |
| <b>Participants</b> | 643 were enrolled in the study; 625 (97.2%) completed 12 month of follow-up.<br>Inclusion criteria: Ambulatory postmenopausal women aged 55 years or older who received oral bisphosphonate therapy for 2 years or longer immediately before screening were eligible if they had a T-score of -2.5 or less at the lumbar spine, total hip, or femoral neck, two or more lumbar vertebrae, and one hip evaluable by dual-energy x-ray absorptiometry (DXA) and baseline serum C-telopeptide of type 1 collagen (CTX) of 500 pg/mL or less. |

|                      |                                                                                                                                                                                                                                                                                                                     |
|----------------------|---------------------------------------------------------------------------------------------------------------------------------------------------------------------------------------------------------------------------------------------------------------------------------------------------------------------|
|                      | Exclusion criteria: Subjects were excluded if they had received denosumab or ZOL at any time; fluoride, strontium ranelate, or iv bisphosphonate other than ZOL within the previous 5 years; PTH or PTH derivatives within the year before enrollment; or other bone-active drugs in the 3 months before screening. |
| <b>Interventions</b> | Intervention: denosumab 60 mg, subcutaneously every 6 months + placebo intravenously on day 1 and denosumab 60 mg, subcutaneously at the month 6 visit (N=320)<br>Control: zoledronic acid 5 mg, intravenously + denosumab placebo subcutaneously on day 1 and denosumab placebo subcutaneously at 6 months (N=320) |
| <b>Outcomes</b>      | Non-vertebral fractures                                                                                                                                                                                                                                                                                             |

### Mortensen 1998

|                      |                                                                                                                                                                                                                                                                                                                                                                                                                                                                                                                                                                                                                                                                                                                                                                                                                                                                                                                                                                                                                                                                                                                                                                                                                                                                                                                                                                                                                                                                                                                                                                                                                                                                                                                                                       |
|----------------------|-------------------------------------------------------------------------------------------------------------------------------------------------------------------------------------------------------------------------------------------------------------------------------------------------------------------------------------------------------------------------------------------------------------------------------------------------------------------------------------------------------------------------------------------------------------------------------------------------------------------------------------------------------------------------------------------------------------------------------------------------------------------------------------------------------------------------------------------------------------------------------------------------------------------------------------------------------------------------------------------------------------------------------------------------------------------------------------------------------------------------------------------------------------------------------------------------------------------------------------------------------------------------------------------------------------------------------------------------------------------------------------------------------------------------------------------------------------------------------------------------------------------------------------------------------------------------------------------------------------------------------------------------------------------------------------------------------------------------------------------------------|
| <b>Methods</b>       | RCT, parallel group<br>3 year study (but was initially a 1 year study)<br>Conducted at two study centers: Indiana University School of Medicine, Indianapolis, Indiana, and the Department of Endocrinology, Aarhus Amtssygehus, Aarhus, Denmark.                                                                                                                                                                                                                                                                                                                                                                                                                                                                                                                                                                                                                                                                                                                                                                                                                                                                                                                                                                                                                                                                                                                                                                                                                                                                                                                                                                                                                                                                                                     |
| <b>Participants</b>  | 111 women were enrolled in the study; all Caucasian<br>Inclusion criteria: Women with normal lumbar spine bone mass (within 2 sd of age matched mean bone mass) who were 6–60 months postmenopausal qualified for enrollment. Patients’ estradiol levels had to be at least 40 pg/mL and FSH at least 20 U/L, and they had to be ambulatory and active, weigh at least 45 kg and no more than 90 kg, and be within 25% of normal weight and height values as determined by the investigator based on standard weight tables (i.e., 1983 Metropolitan Life Insurance tables). Patients also had to be willing and able to participate in the study and to provide written informed consent.<br>Exclusion criteria: Ineligible patients included those who took any bisphosphonate, thyroid hormone therapy, glucocorticoids (>=5 mg prednisone per day), anabolic agents, calcitonin, vitamin D (>400 IU per day), high-dose calcium (>1,500 mg per day), diuretics, or anticonvulsants for more than 1 month within the previous 6 months, estrogens and/or progestogens for more than 1 month within the past year, or fluoride for more than 1 month ever in the past; had a history of any generalized bone disease, including hyperparathyroidism, Paget’s disease of bone, renal osteodystrophy, or any other acquired or congenital bone disease, a documented history of alcohol or drug abuse, or evidence of significant organic or psychiatric disease; any evidence of established osteoporosis, such as an atraumatic vertebral deformity documented by spinal x-ray, or a history of osteoporosis related fracture of the hip or wrist; or who underwent bilateral oophorectomy or had any other type of artificially induced menopause. |
| <b>Interventions</b> | Intervention 1: oral risedronate cyclically - “cyclic group” (risedronate daily for the first 2 weeks of every calendar month and placebo daily for the rest of the month) (N=38)<br>Intervention 2: oral risedronate daily, the “daily group” (N=37)<br>Control: placebo, orally (N=36)                                                                                                                                                                                                                                                                                                                                                                                                                                                                                                                                                                                                                                                                                                                                                                                                                                                                                                                                                                                                                                                                                                                                                                                                                                                                                                                                                                                                                                                              |
| <b>Outcomes</b>      | Vertebral and non-vertebral fractures                                                                                                                                                                                                                                                                                                                                                                                                                                                                                                                                                                                                                                                                                                                                                                                                                                                                                                                                                                                                                                                                                                                                                                                                                                                                                                                                                                                                                                                                                                                                                                                                                                                                                                                 |

#### Musco 2004

|                      |                                                                                                                                                                              |
|----------------------|------------------------------------------------------------------------------------------------------------------------------------------------------------------------------|
| <b>Methods</b>       | RCT, parallel group                                                                                                                                                          |
| <b>Participants</b>  | 2000 women were enrolled in the study<br>Inclusion criteria: osteoporotic female population submitted to a treatment with anti-resorption drugs                              |
| <b>Interventions</b> | Intervention 1: alendronate 10 mg, daily for 24 months (N=1000)<br>Intervention 2: risedronate 5 mg, daily for 24 months (N=100)<br>Control: raloxifene 60 mg, daily (N=100) |
| <b>Outcomes</b>      | Clinical fractures                                                                                                                                                           |

#### Panico 2011

|                      |                                                                                                                                                                                                                                                                                                                                                                                                                                                                                                                                                                                                                                                                                                                                                                                                                                                                                      |
|----------------------|--------------------------------------------------------------------------------------------------------------------------------------------------------------------------------------------------------------------------------------------------------------------------------------------------------------------------------------------------------------------------------------------------------------------------------------------------------------------------------------------------------------------------------------------------------------------------------------------------------------------------------------------------------------------------------------------------------------------------------------------------------------------------------------------------------------------------------------------------------------------------------------|
| <b>Methods</b>       | 18 month RCT, parallel group<br>Department of Molecular and Clinical Endocrinology and Oncology, University of Naples Federico II, Naples, Italy                                                                                                                                                                                                                                                                                                                                                                                                                                                                                                                                                                                                                                                                                                                                     |
| <b>Participants</b>  | 81 women were enrolled<br>Inclusion criteria: Inclusion criteria for this study consisted of back pain, postmenopausal osteoporosis (T-score $\leq -2.5$ at lumbar spine or femoral neck), the presence of 2 osteoporotic vertebral fractures, previous treatment for osteoporosis.<br>Exclusion criteria: The exclusion criteria were: an increased risk of osteosarcoma (i.e., patients with Paget disease bone, previous skeletal exposure to external beam radiotherapy, or previous malignant neoplasm involving the skeleton), hypercalcemia, malignant neoplasms, impaired renal function, liver disease, history of diseases other than postmenopausal osteoporosis that affect bone metabolism, nephrolithiasis, alcohol or drug abuse. Secondary osteoporosis was excluded in order to avoid the interference of the primitive disease with the patient's quality of life. |
| <b>Interventions</b> | Intervention: 20 $\mu$ g s.c. of recombinant human parathyroid hormone (rhPTH 1–34), daily self-administered injections (group A) (N=42)<br>Control: 70 mg per os of alendronate every week (group B) (N=39)                                                                                                                                                                                                                                                                                                                                                                                                                                                                                                                                                                                                                                                                         |
| <b>Outcomes</b>      | Vertebral fractures                                                                                                                                                                                                                                                                                                                                                                                                                                                                                                                                                                                                                                                                                                                                                                                                                                                                  |

#### Pols 1999

|                     |                                                                                                                                                                                                                                                                                                                                                                                                                                                                                                                                                                                                                                                                                                                   |
|---------------------|-------------------------------------------------------------------------------------------------------------------------------------------------------------------------------------------------------------------------------------------------------------------------------------------------------------------------------------------------------------------------------------------------------------------------------------------------------------------------------------------------------------------------------------------------------------------------------------------------------------------------------------------------------------------------------------------------------------------|
| <b>Methods</b>      | FOSIT study: RCT, parallel group<br>153 centers in 34 countries (Australia, Canada, South Africa, China and in Europe and Latin America)                                                                                                                                                                                                                                                                                                                                                                                                                                                                                                                                                                          |
| <b>Participants</b> | N=1908<br>Inclusion criteria: Women eligible for study participation had been postmenopausal for at least 3 years, were not older than 85 years, and had BMD of the lumbar spine (L2–4) at least 2 standard deviations (SD) below the mean for mature, premenopausal women – a value that approximately corresponds to the median BMD of 65-year-old women. Lumbar spine BMD, as measured using dual-energy X-ray absorptiometry (DXA), was $\leq 0.86$ g/cm <sup>2</sup> by Hologic QDR densitometry (Hologic, Waltham, MA) or $\leq 0.98$ g/cm <sup>2</sup> by Lunar DPX densitometry (Lunar, Madison, WI). Eligible patients were otherwise in good health and were between 20% below and 50% above ideal body |

weight as defined in the Metropolitan Life Insurance Company Height and Weight Table. Levels of 25-hydroxyvitamin D were determined before study entry.

Exclusion criteria: Excluded from participation were women with metabolic bone disease other than postmenopausal osteoporosis; disturbed parathyroid or thyroid function; major gastrointestinal disease (for example, peptic ulcer or malabsorption) within the year before enrollment or use of a drug to inhibit gastric acid secretion for >2 weeks within 3 months of study entry; myocardial infarction within the year prior to enrollment; uncontrolled hypertension or untreated angina; significantly impaired renal function (serum creatinine >150 mmol/l); or evidence of significant end organ disease. Also excluded were women who had received a bisphosphonate or fluoride (>8 mg/day) during the previous 6 months; estrogen (except vaginal ≤ 3 times/week), ipriflavone or calcitonin during the previous 4 months; or any anabolic steroid, glucocorticoid or progestin for >2 weeks within the previous 6 months. Participants could not be receiving any medications that might alter bone or mineral metabolism, including vitamin A in excess of 10,000 U/day, vitamin D in excess of 1000 U/day, anticonvulsants or phosphate-binding antacids. Finally, at least three vertebrae from L1 to L4 had to be evaluable by DXA to determine BMD in this region.

**Interventions** Intervention: alendronate 10 mg, once daily for 12 months (N=958)  
Control: placebo, once daily for 12 months (N=950)

**Outcomes** Non-vertebral and hip fracture

#### Recker 2004

**Methods** RCT, parallel group

2862 women were randomized

Inclusion criteria: All participants were postmenopausal women (aged 55–76 years, time since menopause ≥ 5 years) who, at enrolment, had a low BMD T score (-2.0 to -5.0) in at least one vertebra of the lumbar spine (L1–L4) and one to four prevalent vertebral fractures.

**Participants**

Exclusion criteria: Women were excluded if they had a disease or disorder known to influence bone metabolism (chronic GI or liver disease, malignant disease, chronic alcoholism, primary hyperparathyroidism, Paget's disease of bone, histologically documented osteomalacia, active thyroid disease) or had received a drug known to affect bone metabolism in the previous 6 months (corticosteroids, hormone-replacement therapy, calcitonin, cyclosporin, prior bisphosphonate treatment). Women were also excluded if they had received any investigational drug within 30 days of the first dose of the study drug or fluoride pretreatment within the previous 12 months or for a duration of >2 years. Additional exclusion criteria were renal impairment (serum creatinine >210 Amol/l), contraindications for calcium therapy and/or serum calcium concentrations of ≥ 2.6 or <2.0 mmol/l.

**Interventions** Intervention 1: 0.5 mg iv ibandronate injections given once every 3 months for 3 years (N=950)  
Intervention 2: 1 mg iv ibandronate injections given once every 3 months for 3 years (N=961)  
Control: placebo, once every 3 months for 3 years (N=949)

**Outcomes** Vertebral and hip fractures

## Recker 2007

|                      |                                                                                                                                                                                                                                                                                                                                                                                                                                                                                                                                                                                                                                                                                                                                                                                                                                                                                                                                                                                                                                                                                                                                                                                                                                                                                                                                                                                                                                                                                                                                                                                                                                                                                                                                                                                                                                                                                                                                                                                                                                                                                                                                                                                                                                                                                                                                                                                                                                                                                                                             |
|----------------------|-----------------------------------------------------------------------------------------------------------------------------------------------------------------------------------------------------------------------------------------------------------------------------------------------------------------------------------------------------------------------------------------------------------------------------------------------------------------------------------------------------------------------------------------------------------------------------------------------------------------------------------------------------------------------------------------------------------------------------------------------------------------------------------------------------------------------------------------------------------------------------------------------------------------------------------------------------------------------------------------------------------------------------------------------------------------------------------------------------------------------------------------------------------------------------------------------------------------------------------------------------------------------------------------------------------------------------------------------------------------------------------------------------------------------------------------------------------------------------------------------------------------------------------------------------------------------------------------------------------------------------------------------------------------------------------------------------------------------------------------------------------------------------------------------------------------------------------------------------------------------------------------------------------------------------------------------------------------------------------------------------------------------------------------------------------------------------------------------------------------------------------------------------------------------------------------------------------------------------------------------------------------------------------------------------------------------------------------------------------------------------------------------------------------------------------------------------------------------------------------------------------------------------|
| <b>Methods</b>       | The EVA (Evista Alendronate Comparison) trial: RCT, parallel group<br>138 clinical study sites                                                                                                                                                                                                                                                                                                                                                                                                                                                                                                                                                                                                                                                                                                                                                                                                                                                                                                                                                                                                                                                                                                                                                                                                                                                                                                                                                                                                                                                                                                                                                                                                                                                                                                                                                                                                                                                                                                                                                                                                                                                                                                                                                                                                                                                                                                                                                                                                                              |
| <b>Participants</b>  | 1423 women were randomized<br>Inclusion criteria: postmenopausal women between 50 and 80 years of age inclusive, whose last menstrual period occurred at least 2 years prior to study entry. The original study protocol [23] planned to treat 3000 women with osteoporosis, defined by the WHO criteria, with femoral neck bone mineral density (BMD) at least 2.5 but no more than 4.0 standard deviations below the average bone mass for young women (T-score between -2.5 and -4.0, inclusive), according to the 1995 NHANES III reference database [26], and no prevalent vertebral fractures from the fourth thoracic to the fourth lumbar vertebrae, as determined using semi-quantitative analysis. Lateral thoracic and lumbar spinal radiographs were obtained after a patient's eligibility by femoral neck BMD was confirmed by a central coordinating center (Synarc, San Francisco, CA). Women were required to have baseline thoracic and lumbar radiographs evaluable for vertebral fractures, as determined by the coordinating center and at least two lumbar vertebrae evaluable by dual energy X-ray absorptiometry (DXA), prior to enrollment into the treatment phase.<br>Exclusion criteria: Detailed exclusion criteria were previously published [23] and included a history of the following diseases: those which affect calcium or bone metabolism within 1 year of screening, other than low bone mass or osteoporosis; currently suspected or history of known breast or estrogen-dependent carcinoma; history of vaginal bleeding of unknown cause; venous thromboembolic events (VTE), or risk of developing VTE; esophageal abnormalities; and significant abnormal thyroid, hepatic or renal function. Women were also excluded if they took oral or intravenous bisphosphonates, fluorides, parathyroid hormone (PTH) or PTH analog within 1 year, or any other drugs known to significantly affect bone metabolism within 1 month prior to study entry, including calcitonin, estrogens, progestins, androgens, as well as antagonists or selective receptor modulators of these agents, tibolone, aromatase inhibitors; anabolic steroids; vitamin D >50,000 IU/week or calcitriol, or vitamin D analogs; or systemic corticosteroids. Concomitant use of other bone-active agents was prohibited during this study. However, use of estrogens for vaginal lubrication, or ophthalmic, otic, topical, inhaled, or intra-articular corticosteroid therapy was permitted in this study. |
| <b>Interventions</b> | Treatment duration: 5 years<br>Intervention: alendronate 10 mg/day + raloxifene placebo (N=713)<br>Control: raloxifene 60 mg/day + alendronate placebo (N=699)                                                                                                                                                                                                                                                                                                                                                                                                                                                                                                                                                                                                                                                                                                                                                                                                                                                                                                                                                                                                                                                                                                                                                                                                                                                                                                                                                                                                                                                                                                                                                                                                                                                                                                                                                                                                                                                                                                                                                                                                                                                                                                                                                                                                                                                                                                                                                              |
| <b>Outcomes</b>      | Vertebral, non-vertebral and hip fractures                                                                                                                                                                                                                                                                                                                                                                                                                                                                                                                                                                                                                                                                                                                                                                                                                                                                                                                                                                                                                                                                                                                                                                                                                                                                                                                                                                                                                                                                                                                                                                                                                                                                                                                                                                                                                                                                                                                                                                                                                                                                                                                                                                                                                                                                                                                                                                                                                                                                                  |

## Recknor 2013

|                     |                                                                                                                                                                                                                                                                                                                                                                                                                                                                                                        |
|---------------------|--------------------------------------------------------------------------------------------------------------------------------------------------------------------------------------------------------------------------------------------------------------------------------------------------------------------------------------------------------------------------------------------------------------------------------------------------------------------------------------------------------|
| <b>Methods</b>      | RCT, parallel group<br>74 centers in the United States and Europe.                                                                                                                                                                                                                                                                                                                                                                                                                                     |
| <b>Participants</b> | 417 women were randomized; 821 (98.6%) received one or more dose of treatment<br>Inclusion criteria: Postmenopausal women with low bone density who had been treated previously with oral bisphosphonate therapy. Ambulatory, postmenopausal women aged 55 years or older were eligible if they had received their first prescription of daily or weekly bisphosphonate therapy 1 month or more before screening but had either discontinued bisphosphonate treatment or remained on treatment but had |

insufficient adherence assessed by a score of less than 6 on the Osteoporosis Specific Morisky Medication Adherence Scale. Women with a bone mineral density (BMD) T-score of -2 or less and -4 or greater at the total hip or lumbar spine determined at the local site and had one or more proximal femur (hip) and two or more vertebrae between L1 and L4 evaluable by dual-energy x-ray absorptiometry were included.

Exclusion criteria: Exclusion criteria included the current or prior use of osteoporosis medication, except daily or weekly oral bisphosphonate therapy, raloxifene, calcitonin, and hormone replacement therapy; use of medications affecting bone metabolism 3 or fewer months before screening; current enrollment in or less than 1 month since completion of other investigational drug trials; malignancy within the last 5 years, except fully resected basal or squamous cell carcinoma, cervical, or breast carcinoma in situ; impaired renal function (estimated glomerular filtration rate less than 30 mL/min/1.73 m<sup>2</sup>); or contraindications for ibandronate therapy. Study participants with screening 25-hydroxy vitamin D level less than 20 ng/mL were ineligible but could undergo vitamin D repletion and be rescreened. There was no exclusion based on fracture history.

Treatment duration: 12 months

**Interventions** Intervention: 60 mg denosumab subcutaneously every 6 months (N=411)  
Control: 150 mg oral ibandronate once monthly (N=410)

**Outcomes** Clinical and non-vertebral fractures

### Reginster 2003

**Methods** RCT, parallel group  
6 investigative sites in Austria, Belgium, the Czech Republic, Germany and Slovakia

**Participants** Inclusion criteria: Eligible subjects included women aged up to 72 years who had been postmenopausal for at least 2 years. Participants were selected from patients, referred to osteoporosis centers for potential diagnosis and treatment of osteoporosis, and were required to have a BMD, as measured by dual X-ray absorptiometry at the femoral neck, of 2.0 standard deviations (SD) or more below the normal peak bone mass for healthy, premenopausal women (T-score).  
Exclusion criteria: Subjects were excluded from the study for any of the following reasons: more than two fractured lumbar vertebrae or more than three fractured vertebrae of any kind, bone disorders other than primary osteoporosis, endocrine and malignant diseases, uterine and ovarian abnormalities, clinically severe postmenopausal symptoms that required estrogen therapy, a history of thromboembolic disorders, severe chronic diseases, or treatment with any agent that might influence bone turnover.

Treatment duration: 18 months

**Interventions** Intervention: raloxifene HCl 60 mg/day (N=291)  
Control: placebo, daily (N=290)

**Outcomes** Clinical, vertebral, non-vertebral and hip fractures

### Reid 2002

**Methods** 1 year RCT, parallel group  
24 centers in 10 countries



|                      |                                                                                                                                                                                                                                                                                                                                                                                                                                                                                                                                                                                                                                                                                                                                                                                                                                                                                                                                                                                                                                                                                                                                            |
|----------------------|--------------------------------------------------------------------------------------------------------------------------------------------------------------------------------------------------------------------------------------------------------------------------------------------------------------------------------------------------------------------------------------------------------------------------------------------------------------------------------------------------------------------------------------------------------------------------------------------------------------------------------------------------------------------------------------------------------------------------------------------------------------------------------------------------------------------------------------------------------------------------------------------------------------------------------------------------------------------------------------------------------------------------------------------------------------------------------------------------------------------------------------------|
| <b>Participants</b>  | <p>351 women withdrew from the study, most commonly for personal reasons (in the case of 15 women) or because of adverse events (14 women).</p> <p>316 women completed the study. All but two women were white.</p> <p>Inclusion criteria: In all the women, menopause had occurred at least five years previously, either naturally or as the result of bilateral oophorectomy. All women had a bone mineral density at the lumbar spine (L1 to L4) that was at least 2.0 SD below the mean value for young adults (a T score lower than -2) and had no more than one vertebral fracture at screening.</p> <p>Exclusion criteria: Major criteria for exclusion included systemic estrogen treatment within the previous three months, evidence of secondary osteoporosis, clinical or laboratory evidence of hepatic or renal disease, disorders of the parathyroid or thyroid glands, a serum 25-hydroxyvitamin D concentration of 15 ng per milliliter (37 nmol per liter) or less, a history of cancer, previous treatment with bisphosphonates or fluoride, and current therapy with any other drug known to affect the skeleton.</p> |
| <b>Interventions</b> | <p>Intervention: zoledronic acid by intravenous infusion every three months at different doses: 0.25 mg, 0.5 mg, or 1 mg at three month intervals; in addition, one group received a total annual dose of 4 mg as a single dose, and another received two doses of 2 mg each, six months apart. (N=292)</p> <p>Control: placebo (saline) (N=59)</p>                                                                                                                                                                                                                                                                                                                                                                                                                                                                                                                                                                                                                                                                                                                                                                                        |
| <b>Outcomes</b>      | Vertebral and non-vertebral fractures                                                                                                                                                                                                                                                                                                                                                                                                                                                                                                                                                                                                                                                                                                                                                                                                                                                                                                                                                                                                                                                                                                      |

#### Reid 2004

|                      |                                                                                                                                                                                                                                                                                                                                                                                                                                                                                                                                                                                                                                                                                                                                                                                                                                                                                                                                                                                                                                                                                                                                                                                                                                                                                                                                                                                         |
|----------------------|-----------------------------------------------------------------------------------------------------------------------------------------------------------------------------------------------------------------------------------------------------------------------------------------------------------------------------------------------------------------------------------------------------------------------------------------------------------------------------------------------------------------------------------------------------------------------------------------------------------------------------------------------------------------------------------------------------------------------------------------------------------------------------------------------------------------------------------------------------------------------------------------------------------------------------------------------------------------------------------------------------------------------------------------------------------------------------------------------------------------------------------------------------------------------------------------------------------------------------------------------------------------------------------------------------------------------------------------------------------------------------------------|
| <b>Methods</b>       | <p>Phase 3 RCT, parallel group</p> <p>38 centers in Europe, North America, Australasia, and South Africa.</p>                                                                                                                                                                                                                                                                                                                                                                                                                                                                                                                                                                                                                                                                                                                                                                                                                                                                                                                                                                                                                                                                                                                                                                                                                                                                           |
| <b>Participants</b>  | <p>619 subjects were randomized; 95.6% were white.</p> <p>Inclusion criteria: Women were eligible to participate if they were 40 to 60 years of age, postmenopausal (naturally or surgically), had undergone a hysterectomy no more than 15 years before beginning the study, had serum estradiol levels of 20 pg/mL (&lt;73 pmol/L) and follicle-stimulating hormone levels of 40 mIU/mL or higher, and had a lumbar spine BMD measurement between 2.5 SDs below and 2.0 SDs above the mean value for normal premenopausal women.</p> <p>Exclusion criteria: Women were excluded from the study if they had a history of carcinoma of the breast or estrogen dependent tumors; had cancer within the last 5 years (except excised skin cancers); had taken estrogen (other than vaginal estrogens), progestin, androgen, calcitonin, or systemic corticosteroids within the previous 6 months; had ever taken bisphosphonate or fluoride (except for dental prophylaxis); were taking anti-seizure medications; were taking pharmacologic dosages of vitamin D or lipid-lowering drugs; had a history of thromboembolic disorders or of diabetes mellitus or other endocrine disorders requiring therapy (except thyroid hormone therapy); had abnormal renal function or hepatic function; had serious postmenopausal symptoms; or consumed more than 4 alcoholic drinks per day.</p> |
| <b>Interventions</b> | <p>Treatment duration: mean of 2.2 years (60% of subjects were still taking study medication at 3 years)</p> <p>Intervention 1: raloxifene 60mg/d (N=152)</p> <p>Intervention 2: raloxifene 150mg/d (N=157)</p> <p>Control 1: placebo, daily (N=158)</p> <p>Control 2: conjugated equine estrogen 0.625 mg/day (N=152)</p>                                                                                                                                                                                                                                                                                                                                                                                                                                                                                                                                                                                                                                                                                                                                                                                                                                                                                                                                                                                                                                                              |

|                 |                     |
|-----------------|---------------------|
| <b>Outcomes</b> | Vertebral fractures |
|-----------------|---------------------|

#### Reid 2018

|                      |                                                                                                                                                                                                                                                                                                                                                                                                                                                                                                                                                                                                                                                                                                                                                                                                                                                                                                                                                                                                                                                                            |
|----------------------|----------------------------------------------------------------------------------------------------------------------------------------------------------------------------------------------------------------------------------------------------------------------------------------------------------------------------------------------------------------------------------------------------------------------------------------------------------------------------------------------------------------------------------------------------------------------------------------------------------------------------------------------------------------------------------------------------------------------------------------------------------------------------------------------------------------------------------------------------------------------------------------------------------------------------------------------------------------------------------------------------------------------------------------------------------------------------|
| <b>Methods</b>       | RCT, placebo group<br>New Zealand                                                                                                                                                                                                                                                                                                                                                                                                                                                                                                                                                                                                                                                                                                                                                                                                                                                                                                                                                                                                                                          |
| <b>Participants</b>  | N=2000<br>Inclusion criteria: Eligible participants were ambulatory postmenopausal women 65 years of age or older, with a T score of -1.0 to -2.5 at either the total hip or the femoral neck on either side; both hips were assessed in all patients. A T score of less than -2.5 at one hip site (total hip or femoral neck on either side) did not preclude participation in the trial, as long as another hip site met the criteria, so patients at the interface of osteopenia and osteoporosis were included.<br>Exclusion criteria: The presence of spinal osteoporosis was not an exclusion criterion as long as the T score was above -3.0. Other exclusion criteria were an estimated glomerular filtration rate of less than 30 ml per minute per 1.73 m <sup>2</sup> of body-surface area, major systemic disease, cancer in the previous 2 years, metabolic bone disease, or regular use of bone-active drugs in the previous year (including bisphosphonates, estrogen, antiestrogens, and prednisone at a dose of 2.5 mg or greater per day or equivalent). |
| <b>Interventions</b> | Intervention: zoledronate 5 mg, 4 infusions at 18 months intervals for 6 years (N=1000)<br>Control: placebo (normal saline), 4 infusions at 18 months intervals for 6 years (N=1000)                                                                                                                                                                                                                                                                                                                                                                                                                                                                                                                                                                                                                                                                                                                                                                                                                                                                                       |
| <b>Outcomes</b>      | Clinical, major osteoporotic, vertebral, non-vertebral and hip fractures                                                                                                                                                                                                                                                                                                                                                                                                                                                                                                                                                                                                                                                                                                                                                                                                                                                                                                                                                                                                   |

#### Reid 2019

|                      |                                                                                                                                                                                                                                                                                                                                                                                                                                                                                                                                                                                 |
|----------------------|---------------------------------------------------------------------------------------------------------------------------------------------------------------------------------------------------------------------------------------------------------------------------------------------------------------------------------------------------------------------------------------------------------------------------------------------------------------------------------------------------------------------------------------------------------------------------------|
| <b>Methods</b>       | RCT, parallel group<br>6 years of follow-up                                                                                                                                                                                                                                                                                                                                                                                                                                                                                                                                     |
| <b>Participants</b>  | Inclusion criteria: ambulant postmenopausal women aged > 65 years, with T-score at either the right or left total hip or femoral neck in the range -1.0 to -2.5, who were able to give informed consent.<br>Exclusion criteria: lumbar spine T-score < -3.0, eGFR < 30 mL min <sup>-1</sup> , major systemic disease, malignant disease in the last 2 years, metabolic bone disease or regular use of bone-active drugs in the previous year (including oestrogen, anti-oestrogens and systemic glucocorticoids in doses equivalent to prednisone ≥ 2.5 mg day <sup>-1</sup> ). |
| <b>Interventions</b> | Intervention: 4 infusions of Zoledronate 5 mg at 18-months intervals<br>Control: 4 infusions of placebo (normal saline) at 18-months intervals                                                                                                                                                                                                                                                                                                                                                                                                                                  |
| <b>Outcomes</b>      | Major clinical fractures, analysis stratified by age, BMI at baseline, LS T score                                                                                                                                                                                                                                                                                                                                                                                                                                                                                               |

#### Reid 2020

|                |                                                                                                                                                                                |
|----------------|--------------------------------------------------------------------------------------------------------------------------------------------------------------------------------|
| <b>Methods</b> | Prospective, randomized, placebo-controlled, double-blind trial<br>The study was registered at the Australian New Zealand Clinical Trials Registry, number ACTRN12609000593235 |
|----------------|--------------------------------------------------------------------------------------------------------------------------------------------------------------------------------|

|                      |                                                                                                                                                                                                                                                                                                                                                                                                                                                                                                                                          |
|----------------------|------------------------------------------------------------------------------------------------------------------------------------------------------------------------------------------------------------------------------------------------------------------------------------------------------------------------------------------------------------------------------------------------------------------------------------------------------------------------------------------------------------------------------------------|
| <b>Participants</b>  | <p>Each participant was followed for 6 years.</p> <p>Inclusion criteria: Participants were ambulant postmenopausal women aged &gt;65 years, with T-score at the total hip or femoral neck in the range -1.0 to -2.5, who were able to give informed consent.</p> <p>Exclusion criteria: lumbar spine T-score &lt;-3.0, estimated glomerular filtration rate (eGFR) &lt;30 mL/min, major systemic dis-ease, malignant disease in the last 2 years, metabolic bone dis-ease, or regular use of bone-active drugs in the previous year.</p> |
| <b>Interventions</b> | <p>Intervention 1: four infusions of either zoledronate 5 mg at 18-month intervals (N=1000)</p> <p>Control: normal saline at 18-month intervals (N=1000)</p>                                                                                                                                                                                                                                                                                                                                                                             |
| <b>Outcomes</b>      | Fragility fractures                                                                                                                                                                                                                                                                                                                                                                                                                                                                                                                      |

#### Roux 2014

|                      |                                                                                                                                                                                                                                                                                                                                                                                                                                                                                                                                                                                                                                                                                                                                                                                                                                                                                                                                                                                                                                                                                                                                                                                                                                                                                                                                                                                                                                                                                                                                                                                                                                                                                                                                                                                                                                                                                                                                                                                |
|----------------------|--------------------------------------------------------------------------------------------------------------------------------------------------------------------------------------------------------------------------------------------------------------------------------------------------------------------------------------------------------------------------------------------------------------------------------------------------------------------------------------------------------------------------------------------------------------------------------------------------------------------------------------------------------------------------------------------------------------------------------------------------------------------------------------------------------------------------------------------------------------------------------------------------------------------------------------------------------------------------------------------------------------------------------------------------------------------------------------------------------------------------------------------------------------------------------------------------------------------------------------------------------------------------------------------------------------------------------------------------------------------------------------------------------------------------------------------------------------------------------------------------------------------------------------------------------------------------------------------------------------------------------------------------------------------------------------------------------------------------------------------------------------------------------------------------------------------------------------------------------------------------------------------------------------------------------------------------------------------------------|
| <b>Methods</b>       | <p>12 month RCT, parallel group</p> <p>82 centers in Europe, Australia and Canada</p>                                                                                                                                                                                                                                                                                                                                                                                                                                                                                                                                                                                                                                                                                                                                                                                                                                                                                                                                                                                                                                                                                                                                                                                                                                                                                                                                                                                                                                                                                                                                                                                                                                                                                                                                                                                                                                                                                          |
| <b>Participants</b>  | <p>870 participants were randomized; 824 (94.7%) completed the study</p> <p>97.6% were Caucasian</p> <p>Inclusion criteria: Ambulatory, postmenopausal women aged ≥55 years were eligible if they had been previously prescribed alendronate therapy, with first daily or weekly alendronate prescription ≥1 month prior to screening, without limitation of alendronate treatment duration. To be eligible to participate in this study, the subject must have either stopped oral alendronate therapy before the screening visit, or was still taking oral alendronate therapy (no washout period) with low adherence, which was assessed by a score of &lt;6 on the Osteoporosis Specific Morisky Medication Adherence Scale (OS-MMAS).</p> <p>Exclusion criteria: Key exclusion criteria included any prior or current treatment with osteoporosis medication other than daily or weekly oral alendronate therapy, hormone replacement therapy, and calcium and vitamin D (use of raloxifene or calcitonin prior to initiation of alendronate therapy was allowed); use of the following medications within 3 months of screening: tibolone, anabolic steroids or testosterone, and glucocorticosteroids (≥5 mg prednisone equivalent per day for ≥10 days or a total cumulative dose of ≥50 mg); contra indicated or poorly tolerant of alendronate; significantly impaired renal function; previous participation in clinical trials with denosumab within the preceding 12 months regardless of treatment; reported malignancy within the last 5 years, except cervical carcinoma in situ or basal cell carcinoma; and any metabolic bone disease that had the potential to interfere with the interpretation of the findings. Vitamin D deficiency, defined as serum 25 (OH) vitamin D levels &lt;20 ng/mL, was an exclusion criterion: repletion as confirmed by a serum vitamin D level ≥20 ng/mL was allowed and subjects were able to be re-screened only once</p> |
| <b>Interventions</b> | <p>Intervention: denosumab 60 mg, subcutaneously every 6 months (N=429)</p> <p>Control: risedronate orally 150 mg once monthly (QM, one 75 mg tablet on each of 2 consecutive days) (N=429)</p>                                                                                                                                                                                                                                                                                                                                                                                                                                                                                                                                                                                                                                                                                                                                                                                                                                                                                                                                                                                                                                                                                                                                                                                                                                                                                                                                                                                                                                                                                                                                                                                                                                                                                                                                                                                |
| <b>Outcomes</b>      | Clinical fractures                                                                                                                                                                                                                                                                                                                                                                                                                                                                                                                                                                                                                                                                                                                                                                                                                                                                                                                                                                                                                                                                                                                                                                                                                                                                                                                                                                                                                                                                                                                                                                                                                                                                                                                                                                                                                                                                                                                                                             |

## Saag 2017

|                      |                                                                                                                                                                                                                                                                                                                                                                                                                                                                                                                                                                                                                                                                                                                                                                                                                                                                                                                                                            |
|----------------------|------------------------------------------------------------------------------------------------------------------------------------------------------------------------------------------------------------------------------------------------------------------------------------------------------------------------------------------------------------------------------------------------------------------------------------------------------------------------------------------------------------------------------------------------------------------------------------------------------------------------------------------------------------------------------------------------------------------------------------------------------------------------------------------------------------------------------------------------------------------------------------------------------------------------------------------------------------|
| <b>Methods</b>       | Phase 3 RCT, parallel group, with a duration of 12 months. After that, open-label Multicenter, international                                                                                                                                                                                                                                                                                                                                                                                                                                                                                                                                                                                                                                                                                                                                                                                                                                               |
| <b>Participants</b>  | 4093 patients underwent randomization; 3654 patients (89.3%) completed 12 months of the trial<br>Inclusion criteria: Ambulatory postmenopausal women 55 to 90 years of age who met at least one of the following criteria were eligible: a bone mineral density T score of – 2.5 or less at the total hip or femoral neck and either one or more moderate or severe vertebral fractures or two or more mild vertebral fractures; or a bone mineral density T score of –2.0 or less at the total hip or femoral neck and either two or more moderate or severe vertebral fractures or a fracture of the proximal femur sustained 3 to 24 months before randomization.<br>Exclusion criteria: Women were excluded as described previously <sup>5</sup> and for an inability to take alendronate oral tablets or contraindications to alendronate, including a glomerular filtration rate below 35 ml per minute per 1.73 m <sup>2</sup> of body-surface area |
| <b>Interventions</b> | Intervention: monthly subcutaneous romosozumab 210 mg for 12 months of the trial and then weekly oral alendronate 70 mg for open-label period for 12 months (N=2046)<br>Control: weekly oral alendronate 70 mg for 12 months of trial and then for the open-label period for 12 months (N=2047)                                                                                                                                                                                                                                                                                                                                                                                                                                                                                                                                                                                                                                                            |
| <b>Outcomes</b>      | Clinical, vertebral, non-vertebral and hip fractures                                                                                                                                                                                                                                                                                                                                                                                                                                                                                                                                                                                                                                                                                                                                                                                                                                                                                                       |

## Sambrook 2004

|                      |                                                                                                                                                                                                                                                                                                                                                                                                                                                                                                                                                                                                                                                                                                                                                                                                                                                                                                                                                                                                 |
|----------------------|-------------------------------------------------------------------------------------------------------------------------------------------------------------------------------------------------------------------------------------------------------------------------------------------------------------------------------------------------------------------------------------------------------------------------------------------------------------------------------------------------------------------------------------------------------------------------------------------------------------------------------------------------------------------------------------------------------------------------------------------------------------------------------------------------------------------------------------------------------------------------------------------------------------------------------------------------------------------------------------------------|
| <b>Methods</b>       | EFFECT (the Efficacy of FOSAMAX versus EVISTA Comparison Trial): a RCT, parallel group<br>50 clinical trial centers in 16 countries in Europe, South America and Asia-Pacific                                                                                                                                                                                                                                                                                                                                                                                                                                                                                                                                                                                                                                                                                                                                                                                                                   |
| <b>Participants</b>  | 487 women were randomized<br>Inclusion criteria: patients were post-menopausal (defined as at least 6 months beyond the final menstrual period) with low bone density(defined as a BMD at least 2.0 SD below the young normal mean at either the total hip or lumbar spine using the normal range provided by the densitometry manufacturer). Patients were required to be in good general health, and able to accept either treatment.<br>Exclusion criteria: reasons for exclusion included bilateral hip replacement, history of venous thromboembolism, marked hypertriglyceridaemia in response to oestrogen, oesophageal stricture or achalasia, bone-active therapy (including use of a bisphosphonate, oestrogen or oestrogen analogue, or parathyroid hormone) within 1 year of enrolment, and medical conditions or current medications which could affect bone metabolism. Use of oestrogen or other therapies to treat osteoporosis was not allowed during the course of the study. |
| <b>Interventions</b> | Intervention: alendronate 70 mg once weekly + daily placebo identical to raloxifene for 12 months (N=246)<br>Control: raloxifene 60 mg daily + weekly placebo identical to alendronate for 12 months (N=241)                                                                                                                                                                                                                                                                                                                                                                                                                                                                                                                                                                                                                                                                                                                                                                                    |
| <b>Outcomes</b>      | Clinical, vertebral and hip fractures                                                                                                                                                                                                                                                                                                                                                                                                                                                                                                                                                                                                                                                                                                                                                                                                                                                                                                                                                           |

|                      |                                                                                                                                                                                                                                                                                                                                                                                                                                                                                                                                                                                                                                                                                                                                                                                                                                                                                                                                                                                                                                                                                                                                                                                                                                                                                                                                                                                                                                                                                                                                                                                                                                                                                                                                                                                                                                                                                                                                                                                                                                                                                                                                                                                                                                                                                                                                                                                                                                                                                                                                                                                                                                           |
|----------------------|-------------------------------------------------------------------------------------------------------------------------------------------------------------------------------------------------------------------------------------------------------------------------------------------------------------------------------------------------------------------------------------------------------------------------------------------------------------------------------------------------------------------------------------------------------------------------------------------------------------------------------------------------------------------------------------------------------------------------------------------------------------------------------------------------------------------------------------------------------------------------------------------------------------------------------------------------------------------------------------------------------------------------------------------------------------------------------------------------------------------------------------------------------------------------------------------------------------------------------------------------------------------------------------------------------------------------------------------------------------------------------------------------------------------------------------------------------------------------------------------------------------------------------------------------------------------------------------------------------------------------------------------------------------------------------------------------------------------------------------------------------------------------------------------------------------------------------------------------------------------------------------------------------------------------------------------------------------------------------------------------------------------------------------------------------------------------------------------------------------------------------------------------------------------------------------------------------------------------------------------------------------------------------------------------------------------------------------------------------------------------------------------------------------------------------------------------------------------------------------------------------------------------------------------------------------------------------------------------------------------------------------------|
| <b>Methods</b>       | 24-month, randomized, double-blind, placebo-controlled, parallel-group, Phase III trial<br>Conducted at 14 study centers across Finland, The Netherlands, Norway, Spain, and Sweden<br>(Clinicaltrials.gov number NCT0035308)                                                                                                                                                                                                                                                                                                                                                                                                                                                                                                                                                                                                                                                                                                                                                                                                                                                                                                                                                                                                                                                                                                                                                                                                                                                                                                                                                                                                                                                                                                                                                                                                                                                                                                                                                                                                                                                                                                                                                                                                                                                                                                                                                                                                                                                                                                                                                                                                             |
| <b>Participants</b>  | 171 women were enrolled and randomized<br>The intended-to-treat population included 170 women<br>All women were white.<br>Inclusion criteria:<br><p>Healthy, ambulatory, late-postmenopausal (<math>\geq 5</math> years from menopause) women were enrolled in the study. The menopause could be either natural or surgical. <i>Natural menopause</i> was defined as 12 months without menses, based on medical history. Women who were postmenopausal secondary to surgery were required per protocol to have a follicle-stimulating hormone level of <math>\geq 30</math> IU/L and an estradiol level of <math>\leq 150</math> pmol/L. Patients were also required to have a baseline LS BMD T-score between <math>-2.5</math> and <math>-1</math> SD (ie, between <math>2.5</math> and <math>1</math> SD below the mean value for young white female adults [age, 30–40 years]). When measured with a Hologic densitometer (Hologic Inc., Waltham, Massachusetts), this equated to <math>0.772 \text{ g/cm}^2 &lt; \text{LS BMD} &lt; 0.937 \text{ g/cm}^2</math>; using a Lunar densitometer (Lunar Corporation, Madison, Wisconsin), the values were <math>0.882 \text{ g/cm}^2 &lt; \text{LS BMD} &lt; 1.062 \text{ g/cm}^2</math>.<sup>2,3</sup></p> <p>Other inclusion criteria were the presence of <math>\geq 1</math> other risk factor for osteoporosis<sup>19,20</sup> (eg, premature menopause [age <math>&lt; 42</math> years], late menarche [age <math>&gt; 15</math> years], maternal history of osteoporosis-related fractures, body mass index <math>\leq 22 \text{ kg/m}^2</math>, or a smoking habit of <math>\geq 10</math> cigarettes/d) or the presence of hip osteopenia (proximal femur [Fem] T-score <math>\leq -1</math> [ie, <math>\geq 1</math> SD below the mean value in healthy young women]). Women were required to discontinue hormone replacement therapy (HRT), calcitriol, or calcitonin treatment 12, 4, and 4 weeks, respectively, prior to enrollment.</p><br><p>Exclusion criteria:</p> <p>Patients were excluded if they had a history of cancer within the 5 years before the study, any condition that might interfere with the evaluation of LS BMD (eg, confluent aortic calcifications, severe osteoarthritis, spinal fusion, or <math>&gt; 2</math> fractured lumbar vertebrae [L1–L4]), or any disease requiring long-term treatment with systemic corticoids. Patients were also excluded if they had received bisphosphonate therapy (any dosage) within 6 months of starting the study treatment or for <math>&gt; 14</math> days within 1 year before the start of the study.</p> |
| <b>Interventions</b> | Treatment duration: 24 months                                                                                                                                                                                                                                                                                                                                                                                                                                                                                                                                                                                                                                                                                                                                                                                                                                                                                                                                                                                                                                                                                                                                                                                                                                                                                                                                                                                                                                                                                                                                                                                                                                                                                                                                                                                                                                                                                                                                                                                                                                                                                                                                                                                                                                                                                                                                                                                                                                                                                                                                                                                                             |

|                 |                                                                   |
|-----------------|-------------------------------------------------------------------|
|                 | Intervention: risedronate 5 mg (n=114)<br>Control: placebo (n=57) |
| <b>Outcomes</b> | Clinical and non-vertebral fractures                              |

## The ACTIVE (The Abaloparatide Comparator Trial In Vertebral Endpoints) study

### Bilezikian 2019

|                      |                                                                                                                                                                                                                             |
|----------------------|-----------------------------------------------------------------------------------------------------------------------------------------------------------------------------------------------------------------------------|
| <b>Methods</b>       | ACTIVE: phase 3, randomized, double-blind, active-comparator, placebo-controlled study                                                                                                                                      |
| <b>Participants</b>  | Included criteria: women with postmenopausal osteoporosis<br>Exclusion criteria: Patients were excluded from the trial if their serum creatinine was >2.0 mg/dL (177 μmol/L), or was 1.5–2.0 mg/dL with an eGFR <37 mL/min. |
| <b>Interventions</b> | Treatment duration: 18 months<br>Intervention: abaloparatide 80 μg, daily subcutaneous injection<br>Intervention: open label teriparatide (20 mg)<br>Control: placebo, daily subcutaneous injection                         |
| <b>Outcomes</b>      | Vertebral fractures                                                                                                                                                                                                         |

### Cosman 2017

|                      |                                                                                                                                                                                                                                                                                                                                                                                                                                                                                                                                                                                                                                                                                                                                                                                                                                                                                                                                                                                                                                                                                                                                                                                                                      |
|----------------------|----------------------------------------------------------------------------------------------------------------------------------------------------------------------------------------------------------------------------------------------------------------------------------------------------------------------------------------------------------------------------------------------------------------------------------------------------------------------------------------------------------------------------------------------------------------------------------------------------------------------------------------------------------------------------------------------------------------------------------------------------------------------------------------------------------------------------------------------------------------------------------------------------------------------------------------------------------------------------------------------------------------------------------------------------------------------------------------------------------------------------------------------------------------------------------------------------------------------|
| <b>Methods</b>       | ACTIVE trial (NCT01343004): RCT, parallel group<br>28 centers in 10 countries                                                                                                                                                                                                                                                                                                                                                                                                                                                                                                                                                                                                                                                                                                                                                                                                                                                                                                                                                                                                                                                                                                                                        |
| <b>Participants</b>  | Inclusion criteria: Postmenopausal women aged 49 to 86 years were enrolled in the ACTIVE trial if they had radiological evidence of at least 2 mild or at least 1 moderate lumbar or thoracic vertebral fractures or a history of nonvertebral fracture within the preceding 5 years, in addition to a BMD T-score –2.5 at the lumbar spine or hip or –2.0 for those older than 65 years. Women older than 65 years were also enrolled without prior fracture if they had a BMD T-score –3.0.<br>Exclusion criteria: Women were excluded if they had more than 4 mild, moderate, or any severe vertebral fractures (consistent with definitions described by Genant et al16), fewer than 2 evaluable lumbar vertebrae, or if hip BMD was unevaluable. Participants were ineligible if they had evidence of metabolic bone disease or malabsorption or were taking any medications that would interfere with bone metabolism. Women were also excluded if they used bisphosphonates for more than 3 months in the past 5 years or denosumab within the past year. Women with a history of osteosarcoma were also excluded. (See the ACTIVE Trial Protocol in Supplement 1 for full inclusion and exclusion criteria.) |
| <b>Interventions</b> | Treatment duration: 18 months<br>Intervention: abaloparatide 80 μg, daily subcutaneous injection<br>Control: placebo, daily subcutaneous injection                                                                                                                                                                                                                                                                                                                                                                                                                                                                                                                                                                                                                                                                                                                                                                                                                                                                                                                                                                                                                                                                   |
| <b>Outcomes</b>      | Non-vertebral fractures                                                                                                                                                                                                                                                                                                                                                                                                                                                                                                                                                                                                                                                                                                                                                                                                                                                                                                                                                                                                                                                                                                                                                                                              |

## Cosman 2020

|                      |                                                                                                                                                                                                                                                                                                                                                                                                                                                                                                 |
|----------------------|-------------------------------------------------------------------------------------------------------------------------------------------------------------------------------------------------------------------------------------------------------------------------------------------------------------------------------------------------------------------------------------------------------------------------------------------------------------------------------------------------|
| <b>Methods</b>       | ACTIVE: a randomized, double-blind, placebo- and active-controlled, multicenter, phase 3 study (clinicaltrials.gov identifier NCT01343004)<br>ACTIVEExtend: 24-month, open-label extension of ACTIVE (clinicaltrials.gov identifier NCT01657162).                                                                                                                                                                                                                                               |
| <b>Participants</b>  | Inclusion criteria: postmenopausal women between the ages of 49 and 86 years with osteoporosis defined by bone mineral density and prior fracture history. Concomitant medications such as statins, aspirin, or antihypertensives were allowed if the dose was stable at entry.<br>Exclusion criteria: not provided.                                                                                                                                                                            |
| <b>Interventions</b> | ACTIVE treatment for 18 months:<br>Intervention 1: daily subcutaneous abaloparatide 80 µg (N=822)<br>Control: matching placebo (N=820)<br>Intervention 2: open-label daily subcutaneous teriparatide 20 µg (N=818)<br>After an approximately 1-month treatment-free period for re-consent, eligible participants who had been randomized to either abaloparatide or placebo in ACTIVE were enrolled in ACTIVEExtend and transitioned to open-label alendronate 70 mg once-weekly for 24 months. |
| <b>Outcomes</b>      | New vertebral and non-vertebral fractures; major osteoporotic fractures, CVD                                                                                                                                                                                                                                                                                                                                                                                                                    |

## McClung 2018

|                      |                                                                                                                                                                                                                                                                                                                                                                                                                                                                                                                                                                               |
|----------------------|-------------------------------------------------------------------------------------------------------------------------------------------------------------------------------------------------------------------------------------------------------------------------------------------------------------------------------------------------------------------------------------------------------------------------------------------------------------------------------------------------------------------------------------------------------------------------------|
| <b>Methods</b>       | The ACTIVE study: a randomized, multinational phase 3 trial<br>Posthoc analysis using data from women enrolled in the ACTIVE Trial that were ≥ 80 years                                                                                                                                                                                                                                                                                                                                                                                                                       |
| <b>Participants</b>  | 94 women (5.7%) out of 1645 women in the treatment groups of the ACTIVE trial were aged 80 years or old.<br>Inclusion criteria: postmenopausal women, aged 49 to 86 years, with osteoporosis as defined by prior radiographic vertebral fracture or recent (within 5 y of enrollment) nonvertebral fracture with a BMD T-score ≤ -2.5 and > -5.0 at the lumbar spine or femoral neck if aged 65 years or ≤ -2.0 and > -5.0 if aged >65 years. For those aged >65 years, no prior fracture was required if the lumbar spine or femoral neck BMD T-score was ≤ -3.0 and > -5.0. |
| <b>Interventions</b> | Intervention: daily injections of abaloparatide 80µg for 18 months (N=51)<br>Control: matching placebo for 18 months (N=43)                                                                                                                                                                                                                                                                                                                                                                                                                                                   |
| <b>Outcomes</b>      | Vertebral and non-vertebral fractures                                                                                                                                                                                                                                                                                                                                                                                                                                                                                                                                         |

## McClung 2018a

|                     |                                                                                                                                                                                                                                                                                                                                                                                                                             |
|---------------------|-----------------------------------------------------------------------------------------------------------------------------------------------------------------------------------------------------------------------------------------------------------------------------------------------------------------------------------------------------------------------------------------------------------------------------|
| <b>Methods</b>      | ACTIVE study: multicenter, multinational (South America, Asia, North America and Europe)                                                                                                                                                                                                                                                                                                                                    |
| <b>Participants</b> | Inclusion: postmenopausal women, ages 49–86 years, with osteoporosis as defined by prior radiographic vertebral fracture or recent (within 5 years of enrollment) non-vertebral fracture with a BMD T-score ≤ -2.5 at the lumbar spine or femoral neck if age ≤ 65 years or ≤ -2.0 if age > 65 years. For those aged > 65 years, no prior fracture was required if the lumbar spine or femoral neck BMD t score was ≤ -3.0. |

|                      |                                                                                                                                                                                               |
|----------------------|-----------------------------------------------------------------------------------------------------------------------------------------------------------------------------------------------|
| <b>Interventions</b> | This analysis included 1645 women that were randomized 1:1:1 to receive:<br>Intervention: daily injections of abaloparatide-SC 80 µg for 18 months<br>Control: matching placebo for 18 months |
| <b>Outcomes</b>      | Vertebral and non-vertebral fractures                                                                                                                                                         |

#### Miller 2016a

|                      |                                                                                                                                                                                                                                                                                                                                                                                                                                                                                                                                                                                                                                                                                                                                                                                                                                                                                                                                                                                                                                                                                                                                                                                                                                                                                                                                                                                                                                                                                                                                                                                                                                                                                                                   |
|----------------------|-------------------------------------------------------------------------------------------------------------------------------------------------------------------------------------------------------------------------------------------------------------------------------------------------------------------------------------------------------------------------------------------------------------------------------------------------------------------------------------------------------------------------------------------------------------------------------------------------------------------------------------------------------------------------------------------------------------------------------------------------------------------------------------------------------------------------------------------------------------------------------------------------------------------------------------------------------------------------------------------------------------------------------------------------------------------------------------------------------------------------------------------------------------------------------------------------------------------------------------------------------------------------------------------------------------------------------------------------------------------------------------------------------------------------------------------------------------------------------------------------------------------------------------------------------------------------------------------------------------------------------------------------------------------------------------------------------------------|
| <b>Methods</b>       | ACTIVE: a RCT, parallel group<br>28 study centers in 10 countries                                                                                                                                                                                                                                                                                                                                                                                                                                                                                                                                                                                                                                                                                                                                                                                                                                                                                                                                                                                                                                                                                                                                                                                                                                                                                                                                                                                                                                                                                                                                                                                                                                                 |
| <b>Participants</b>  | 2463 women were randomized<br>Inclusion criteria: Postmenopausal women aged 49 to 86 years were eligible if they had bone mineral density (BMD) by dual energy x-ray absorptiometry T-score of less than or equal to -2.5 and greater than -5.0 at the lumbar spine or femoral neck together with radiologic evidence of at least 2 mild vertebral fractures or at least 1 moderate vertebral fracture <sup>16</sup> or history of a low-trauma fracture of the forearm, humerus, sacrum, pelvis, hip, femur, or tibia within the past 5 years. Women older than 65 years who met fracture criteria but had a T score of less than or equal to -2.0 and greater than -5.0 were eligible. Women older than 65 years were eligible without fracture criteria if either BMD T score was less than or equal to -3.0 and greater than -5.0. Eligibility required normal serum values for calcium, intact parathyroid hormone, phosphorus, and alkaline phosphatase and a 25-hydroxyvitamin D level of greater than 15 ng/mL (37.5 nmol/L [SI conversion, multiply by 2.496]).<br>Exclusion criteria: Women were excluded if they had more than 4 mild, moderate, or any severe vertebral fractures (consistent with definitions described by Genant et al <sup>16</sup> ), fewer than 2 evaluable lumbar vertebrae, or if hip BMD was unevaluable. Participants were ineligible if they had evidence of metabolic bone disease or malabsorption or were taking any medications that would interfere with bone metabolism. Women were also excluded if they used bisphosphonates for more than 3 months in the past 5 years or denosumab within the past year. Women with a history of osteosarcoma were also excluded. |
| <b>Interventions</b> | Treatment duration: 18 months<br>Intervention 1: daily subcutaneous injections of abaloparatide, 80 µg (N=824)<br>Intervention 2: open-label teriparatide 20 µg (N=818)<br>Control: placebo, daily (N=821)                                                                                                                                                                                                                                                                                                                                                                                                                                                                                                                                                                                                                                                                                                                                                                                                                                                                                                                                                                                                                                                                                                                                                                                                                                                                                                                                                                                                                                                                                                        |
| <b>Outcomes</b>      | Clinical, major osteoporotic, vertebral and non-vertebral fractures                                                                                                                                                                                                                                                                                                                                                                                                                                                                                                                                                                                                                                                                                                                                                                                                                                                                                                                                                                                                                                                                                                                                                                                                                                                                                                                                                                                                                                                                                                                                                                                                                                               |

#### Saag 2020

|                     |                                                                                                                                                                                                                                                                                                                                                           |
|---------------------|-----------------------------------------------------------------------------------------------------------------------------------------------------------------------------------------------------------------------------------------------------------------------------------------------------------------------------------------------------------|
| <b>Methods</b>      | The Abaloparatide Comparator Trial in Vertebral Endpoints (ACTIVE) trial: randomized, multicenter study (NCT01343004).<br>Subgroup analysis of women in the ACTIVE trial                                                                                                                                                                                  |
| <b>Participants</b> | <b>Inclusion criteria in the ACTIVE trial:</b> postmenopausal women aged 49-86 years with osteoporosis, has been previously described. <sup>19</sup> Briefly, women with a prior radiographic vertebral fracture or recent (within 5 years) nonvertebral fracture and a BMD T score of ≤-2.5 and >-5.0 (if aged >65 years) or ≤-2.0 or >-5.0 (if aged >65 |



years) were included in the study. Women >65 years of age with no prior fracture and a lumbar spine or femoral neck BMD T score of  $\leq -3.0$  or  $> -5.0$  were also eligible.

**Inclusion criteria for this subgroup analysis:** women in the ACTIVE study who were <65 years of age and who met modified utilization management criteria (baseline T score at any site of  $\leq -2.5$  and a prevalent vertebral and/or at least 1 prior clinical fracture within 5 years of randomization). The modified utilization management criteria were based on coverage criteria for abaloparatide from a large US health insurance company.

**Interventions** Participants were randomly assigned 1:1:1 to receive for 18 months: double blind, daily abaloparatide 80  $\mu\text{g}$  subcutaneously (N=94), matching placebo subcutaneously (N=103), or open-label teriparatide 20  $\mu\text{g}$  subcutaneously (N=99).  
NOTE: In parentheses, it is given the number of women that met inclusion criteria by treatment for this subgroup analysis.

**Outcomes** Vertebral fractures, non-vertebral fractures, clinical fractures and major osteoporotic fractures.

#### Watts 2019

**Methods** The 18-month phase 3 Abaloparatide Comparator Trial in Vertebral Endpoints (ACTIVE): multicenter, multinational, randomized controlled study (clinicaltrials.gov identifier: NCT01343004).  
Explanatory analysis that used data from the ACTIVE study.

**Participants** **Inclusion criteria:** postmenopausal women, ages 49 to 86 years, with osteoporosis as defined by prior radiographic vertebral fracture or recent (within 5 years of enrollment) nonvertebral fracture with a BMD T-score  $\leq -2.5$  at the lumbar spine or femoral neck if age  $\leq 65$  years or  $\leq -2.0$  if age  $> 65$  years. For those aged  $> 65$  years, no prior fracture was required if the lumbar spine or femoral neck BMD T-score was  $\leq -3.0$ . Other inclusion/exclusion criteria have been previously described (REF: Miller 2016).

**Interventions** Participants were randomly assigned 1:1:1 to double blind, daily abaloparatide 80  $\mu\text{g}$  subcutaneously, matching placebo subcutaneously, or open-label teriparatide 20  $\mu\text{g}$  subcutaneously for 18 months.  
All women received supplements of 500 to 1000 mg/day calcium and 400 to 800 IU vitamin D based on regional standard of care.

**Outcomes** Wrist fractures

#### The BONE study (oral iBandronate Osteoporosis Vertebral Fracture Trial in North America and Europe, BONE)

##### Chesnut 2004

**Methods** BONE trial: 3 year RCT, parallel group  
73 centers in North America and Europe

**Participants** 2946 women were enrolled and randomized; 1938 women completed treatment

|                      |                                                                                                                                                                                                                                                                                                                                                                                                                                                                                                                                                                                                                                                                                                                                                                                                                                                                                                                                                                                   |
|----------------------|-----------------------------------------------------------------------------------------------------------------------------------------------------------------------------------------------------------------------------------------------------------------------------------------------------------------------------------------------------------------------------------------------------------------------------------------------------------------------------------------------------------------------------------------------------------------------------------------------------------------------------------------------------------------------------------------------------------------------------------------------------------------------------------------------------------------------------------------------------------------------------------------------------------------------------------------------------------------------------------|
|                      | <p>Inclusion criteria: Eligible patients were 55–80years of age and <math>\geq 5</math> years postmenopausal, with one to four prevalent vertebral fractures (T4–L4) and a BMD T score of -2.0 to -5.0 in at least one vertebra (L1–L4). Patients with upper GI disorders or taking medication with a potential for GI irritation were not specifically excluded.</p> <p>Exclusion criteria: The main exclusion criteria were a BMD T score of <math>&lt; -5.0</math> at the lumbar spine; more than two prevalent fractures of the lumbar spine; diseases, disorders, or therapy (within the last 6 months) known to affect bone metabolism; previous treatment with bisphosphonates; fluoride treatment within the last 12 months or for a total duration of <math>&gt; 2</math> years; renal impairment (serum creatinine <math>&gt; 2.4</math> mg/dl [<math>&gt; 212 \mu\text{M}</math>]); contraindications to calcium or vitamin D therapy; and hyper- or hypocalcemia.</p> |
| <b>Interventions</b> | <p>Intervention 1: ibandronate 2.5 mg, oral daily (N=977)</p> <p>Intervention 2: ibandronate 20 mg, oral every other day for 12 doses every 3 months; on the days when no active medication was given, patients received placebo (N=977)</p> <p>Control: placebo, oral daily (N=975)</p>                                                                                                                                                                                                                                                                                                                                                                                                                                                                                                                                                                                                                                                                                          |
| <b>Outcomes</b>      | Vertebral and non-vertebral fractures                                                                                                                                                                                                                                                                                                                                                                                                                                                                                                                                                                                                                                                                                                                                                                                                                                                                                                                                             |

#### Chesnut 2005

|                      |                                                                                                                                                                                                                                                                                                                                                                                                                                                                                                  |
|----------------------|--------------------------------------------------------------------------------------------------------------------------------------------------------------------------------------------------------------------------------------------------------------------------------------------------------------------------------------------------------------------------------------------------------------------------------------------------------------------------------------------------|
| <b>Methods</b>       | BONE: a double-blind, placebo-controlled, phase III, fracture-prevention study<br>73 centers in North America (United States and Canada) and Europe.                                                                                                                                                                                                                                                                                                                                             |
| <b>Participants</b>  | <p>Inclusion criteria: postmenopausal women (aged 55years–80years; time since menopause: at least 5 years) with osteoporosis (one to four prevalent vertebral fractures [T4–L4] and BMD T-score <math>-2</math> to <math>-5</math> in at least one vertebra [L1–L4]). Participants with upper gastro intestinal (GI) disorders or receiving concomitant medications with a potential for GI irritation (e.g., nonsteroidal anti-inflammatory drugs [NSAIDs]) were not specifically excluded.</p> |
| <b>Interventions</b> | <p>3 years of treatment.</p> <p>Intervention 1: ibandronate 2.5 mg, oral daily (N=977)</p> <p>Intervention 2: ibandronate 20 mg, oral every other day for 12 doses every 3 months; on the days when no active medication was given, patients received placebo (N=977)</p> <p>Control: placebo, oral daily (N=975)</p>                                                                                                                                                                            |
| <b>Outcomes</b>      | Clinical, vertebral and non-vertebral fractures                                                                                                                                                                                                                                                                                                                                                                                                                                                  |

#### Delmas 2004

|                      |                                                                                                                                                                                                                                                                                       |
|----------------------|---------------------------------------------------------------------------------------------------------------------------------------------------------------------------------------------------------------------------------------------------------------------------------------|
| <b>Methods</b>       | <p>The BONE study: a multinational, randomized, double-blind, placebo-controlled, pivotal fracture-prevention study</p> <p>North America and Europe</p>                                                                                                                               |
| <b>Participants</b>  | <p>ITT population: 2929</p> <p>2946 patients, aged 55-80 years, <math>\geq 5</math> years postmenopause, with one to four prevalent vertebral fractures (T4-L4), and with a BMD T-score of -2.0 to -5.0 in at least one vertebra (L1-L4) were included.</p>                           |
| <b>Interventions</b> | <p>Intervention 1: ibandronate, 2.5 mg, oral daily (N=not stated/unclear)</p> <p>Intervention 2: ibandronate, 20 mg, oral every other day for 12 doses every 3 months. On days without active treatment, the participants in this group received placebo. (N= not stated/unclear)</p> |

|                 |                                          |
|-----------------|------------------------------------------|
|                 | Control: placebo (N= not stated/unclear) |
| <b>Outcomes</b> | Vertebral fractures                      |

### Felsenberg 2005

|                      |                                                                                                                                                                                                                                                                                                                                                                                                                |
|----------------------|----------------------------------------------------------------------------------------------------------------------------------------------------------------------------------------------------------------------------------------------------------------------------------------------------------------------------------------------------------------------------------------------------------------|
| <b>Methods</b>       | Posthoc analysis using data from the BONE study: f a multinational, randomized, double-blind, placebo-controlled, phase III, fracture prevention study North America and Europe.                                                                                                                                                                                                                               |
| <b>Participants</b>  | The BONE study enrolled 2946 patients aged 55 –80 years, ≥5 years postmenopause, with 1 – 4 prevalent vertebral fractures (T4 –L4), and with a BMD T score of -2.0 to -5.0 in ≥1 vertebra (L1 –L4).<br>1964 women were included in this analysis, 982 women in each treatment group (intervention vs control)<br>628 women in the placebo group and 648 women in the ibandronate group completed the treatment |
| <b>Interventions</b> | Treatment duration: 3 years<br>Intervention: oral ibandronate 2.5 mg/day (N=977)<br>Control: placebo, daily (N=975)                                                                                                                                                                                                                                                                                            |
| <b>Outcomes</b>      | Vertebral fractures                                                                                                                                                                                                                                                                                                                                                                                            |

### FIT (The Fracture Intervention Trial)

#### Bauer 2006

|                      |                                                                                                                                                                                                                                                                                                                                                                                                                                                                                                                                                                                    |
|----------------------|------------------------------------------------------------------------------------------------------------------------------------------------------------------------------------------------------------------------------------------------------------------------------------------------------------------------------------------------------------------------------------------------------------------------------------------------------------------------------------------------------------------------------------------------------------------------------------|
| <b>Methods</b>       | Posthoc analysis using data from the FIT, a randomized, double-blind clinical trial 11 clinical centers in the United States                                                                                                                                                                                                                                                                                                                                                                                                                                                       |
| <b>Participants</b>  | Included data from both the vertebral fracture arm, which enrolled women with one or more existing vertebral fractures (duration of 3 years), and the clinical fracture arm, which enrolled women without baseline vertebral fracture (duration 4 years).<br>N=6186 - women who completed the trial and had complete baseline and follow-up measurements.<br>Inclusion criteria: postmenopausal women between 55 and 80 years of age with femoral neck BMD (QDR-2000; Hologic, Waltham, MA, USA) 0.68 g/cm <sup>2</sup> , equivalent to T score ≤-1.6 using NHANES normative data. |
| <b>Interventions</b> | Intervention: Alendronate (ALN) 5 mg /day for 2 years and then increased to 10 mg/day at the second annual visit<br>- Intervention 1: osteoporotic subjects (N= 1764)<br>- Intervention 2: non-osteoporotic subjects(N=1341)<br>Control: placebo (PBO), daily<br>- Control 1: osteoporotic subjects (N=1731)<br>- Control 2: non-osteoporotic subjects (N=1348)                                                                                                                                                                                                                    |
| <b>Outcomes</b>      | Vertebral and non-vertebral fractures                                                                                                                                                                                                                                                                                                                                                                                                                                                                                                                                              |

## Black 1996

|                      |                                                                                                                                                                                                                                                                                                                                                                                                                                                                                                                                                                                                                                                                                                                                                                                                                                                                                                                                                                                                             |
|----------------------|-------------------------------------------------------------------------------------------------------------------------------------------------------------------------------------------------------------------------------------------------------------------------------------------------------------------------------------------------------------------------------------------------------------------------------------------------------------------------------------------------------------------------------------------------------------------------------------------------------------------------------------------------------------------------------------------------------------------------------------------------------------------------------------------------------------------------------------------------------------------------------------------------------------------------------------------------------------------------------------------------------------|
| <b>Methods</b>       | FIT: RCT, parallel group<br>11 centers in the USA                                                                                                                                                                                                                                                                                                                                                                                                                                                                                                                                                                                                                                                                                                                                                                                                                                                                                                                                                           |
| <b>Participants</b>  | N=2027<br>Inclusion criteria: A woman must be 55-80 years of age, in good health, postmenopausal for at least 2 years, and have a femoral neck bone mineral density $\leq 0.68$ g/cm <sup>2</sup> .<br>Exclusion criteria: Women with peptic-ulcer disease (a single hospital admission for upper-gastrointestinal bleeding or two or more documented ulcers within the preceding 5 years), dyspepsia requiring daily treatment, abnormal renal function (serum creatinine $>144$ nmol/L), major medical problems that would be likely to preclude participation for 3 y, severe malabsorption syndrome, uncontrolled hypertension (blood pressure $>210$ mm Hg systolic or $>105$ mm Hg diastolic), myocardial infarction during the previous 6 mo, unstable angina, or evidence of disturbed thyroid or parathyroid function. Also excluded women who had taken oestrogen or calcitonin within the preceding 6 mo or biphosphonates or sodium fluoride ( $<1$ mg daily for 2 weeks or longer) at anytime. |
| <b>Interventions</b> | Treatment duration: 3 years<br>Intervention: alendronate 5 mg/day in the 1 <sup>st</sup> year and then increased to 10 mg/day at the 24 months clinic visit (N=1022)<br>Control: placebo, daily (N=1005)                                                                                                                                                                                                                                                                                                                                                                                                                                                                                                                                                                                                                                                                                                                                                                                                    |
| <b>Outcomes</b>      | Clinical, vertebral, non-vertebral and hip fractures                                                                                                                                                                                                                                                                                                                                                                                                                                                                                                                                                                                                                                                                                                                                                                                                                                                                                                                                                        |

## Chapurlat 2005

|                      |                                                                                                                                                                                                                                                                                                                                                                                        |
|----------------------|----------------------------------------------------------------------------------------------------------------------------------------------------------------------------------------------------------------------------------------------------------------------------------------------------------------------------------------------------------------------------------------|
| <b>Methods</b>       | FIT<br>11 clinical centers in the USA<br>The FIT had two arms, which in this study were pooled: the vertebral fracture arm (FIT-I) with a duration of 3 years, and the clinical fracture arm (FIT-II) with a duration of 4 years.                                                                                                                                                      |
| <b>Participants</b>  | N=5383 - patients who adhered to treatment by taking at least 70% of pills by pill count and 75% by diary.<br>- FIT-I: included 2,027 women who had prevalent vertebral fractures and low femoral neck BMD ( $\leq 0.689$ g/cm <sup>2</sup> ).<br>- FIT-II: enrolled 4,432 women who had low femoral neck BMD ( $\leq 0.68$ g/cm <sup>2</sup> ) but no vertebral fracture at baseline. |
| <b>Interventions</b> | Intervention: alendronate 5 mg /day for 2 years, which was then increased to 10 mg/day<br>Control: placebo                                                                                                                                                                                                                                                                             |
| <b>Outcomes</b>      | Vertebral fracture                                                                                                                                                                                                                                                                                                                                                                     |

## Cummings 1998

|                |                                                                                                                                                                                                                                           |
|----------------|-------------------------------------------------------------------------------------------------------------------------------------------------------------------------------------------------------------------------------------------|
| <b>Methods</b> | FIT - RCT, parallel group – had 2 arms: the vertebral fracture arm, which included women who had vertebral fractures, and the clinical fracture arm, which included women without vertebral fractures and is the subject of this article. |
|----------------|-------------------------------------------------------------------------------------------------------------------------------------------------------------------------------------------------------------------------------------------|

|                      |                                                                                                                                                                                                                                                                                                                                                                                                                                                                                                                                                                                                                                                                                                                                                                                                                                                                                                                                                                                                                                                                                                                                                                                                                    |
|----------------------|--------------------------------------------------------------------------------------------------------------------------------------------------------------------------------------------------------------------------------------------------------------------------------------------------------------------------------------------------------------------------------------------------------------------------------------------------------------------------------------------------------------------------------------------------------------------------------------------------------------------------------------------------------------------------------------------------------------------------------------------------------------------------------------------------------------------------------------------------------------------------------------------------------------------------------------------------------------------------------------------------------------------------------------------------------------------------------------------------------------------------------------------------------------------------------------------------------------------|
|                      | 11 community-based clinical research centers in the United States                                                                                                                                                                                                                                                                                                                                                                                                                                                                                                                                                                                                                                                                                                                                                                                                                                                                                                                                                                                                                                                                                                                                                  |
| <b>Participants</b>  | <p>N= 4432, 97% were white</p> <p>4272 women (96%) completed the study; follow-up: average of 4.2 years</p> <p>Inclusion criteria: women aged 55 through 80 years who had been postmenopausal for at least 2 years and had femoral neck BMD of 0.68 g/cm<sup>2</sup> (QDR2000, Hologic Inc, Waltham, Mass) or less, which corresponded to 1.6 SD or more below the normal young adult mean.</p> <p>Exclusion criteria: women who had recent peptic ulcers or ulcers that required hospitalization, dyspepsia requiring daily treatment, significant renal or hepatic dysfunction, medical problems that precluded 3 years of participation, severe malabsorption, blood pressure exceeding 210 mm Hg systolic or 105 mm Hg diastolic, myocardial infarction within 6 months, unstable angina, hypothyroidism, hyperthyroidism, or hyperparathyroidism. We also excluded women who had taken estrogen or calcitonin within the preceding 6 months or bisphosphonates or sodium fluoride (&gt;1 mg/d) at any time. Although women taking estrogen were excluded from entry into the trial, 246 (11.1%) in the placebo group and 204 (9.2%) in the alendronate group took estrogen at some time during the study.</p> |
| <b>Interventions</b> | <p>Intervention: alendronate sodium 5 mg/day for 2 years, followed by 10 mg/day from the rest of the trial (N=2214)</p> <p>Control: placebo, daily (N=2218)</p>                                                                                                                                                                                                                                                                                                                                                                                                                                                                                                                                                                                                                                                                                                                                                                                                                                                                                                                                                                                                                                                    |
| <b>Outcomes</b>      | Clinical, vertebral, non-vertebral and hip fractures                                                                                                                                                                                                                                                                                                                                                                                                                                                                                                                                                                                                                                                                                                                                                                                                                                                                                                                                                                                                                                                                                                                                                               |

#### Donaldson 2012

|                      |                                                                                                                                                                                                                                                                                                                                                                                                                                                                                                                                                                                                                  |
|----------------------|------------------------------------------------------------------------------------------------------------------------------------------------------------------------------------------------------------------------------------------------------------------------------------------------------------------------------------------------------------------------------------------------------------------------------------------------------------------------------------------------------------------------------------------------------------------------------------------------------------------|
| <b>Methods</b>       | <p>FIT: RCT, parallel group</p> <p>The FIT had 2 arms: the vertebral fracture arm, which included women who had vertebral fractures, and the clinical fracture arm, which included women without vertebral fractures.</p> <p>11 community-based clinical research centers in the United States</p>                                                                                                                                                                                                                                                                                                               |
| <b>Participants</b>  | <p>Inclusion criteria: Women 55 to 81 years of age who had been postmenopausal for at least 2 years and had low FN BMD (BMD <math>\leq</math> 0.68 g/cm<sup>2</sup>; T-score <math>\leq</math> -1.6).</p> <p>Exclusion criteria: The primary exclusion criteria are the presence of major medical conditions or secondary causes of osteoporosis, the presence of significant upper gastrointestinal disease, therapy with drugs that affect bone metabolism or factors that might make full compliance with the protocol unlikely. A complete list of inclusion and exclusion criteria is shown in Table 2.</p> |
| <b>Interventions</b> | <p>Women who participated in FIT-VF were followed for a median of 3 years. Women who participated in FIT-CF were followed for a median of 4 years.</p> <p>Intervention: alendronate 5 mg/day (N=3236)</p> <p>Control: placebo, daily (N=3223)</p>                                                                                                                                                                                                                                                                                                                                                                |
| <b>Outcomes</b>      | Non-vertebral fractures                                                                                                                                                                                                                                                                                                                                                                                                                                                                                                                                                                                          |

#### Hochberg 2005

|                |                                                                          |
|----------------|--------------------------------------------------------------------------|
| <b>Methods</b> | <p>FIT: a RCT, parallel group</p> <p>11 centers in the United States</p> |
|----------------|--------------------------------------------------------------------------|

|                      |                                                                                                                                                                                                                                                                                            |
|----------------------|--------------------------------------------------------------------------------------------------------------------------------------------------------------------------------------------------------------------------------------------------------------------------------------------|
| <b>Participants</b>  | Inclusion criteria: Study participants were women 55–80 years of age who had been postmenopausal for at least 2 years and had a femoral neck BMD $\leq$ 0.68 g/cm <sup>2</sup> , measured using Hologic densitometer                                                                       |
| <b>Interventions</b> | The average duration of treatment and follow-up according to the FIT protocol was 2.9 years in FIT I and 4.25 years in FIT II.<br>Intervention: alendronate 5mg/day for the first 24 months, followed by 10 mg/day for the rest of the period (N=4408)<br>Control: placebo, daily (N=4343) |
| <b>Outcomes</b>      | Major, vertebral, non-vertebral and hip fractures                                                                                                                                                                                                                                          |

#### Nevitt 1999

|                      |                                                                                                                                                                                                                                                                                                                                                                                                                                                                                                                                                                                                                                                                                                                                                                                                                                                                                                                                                                                                                                         |
|----------------------|-----------------------------------------------------------------------------------------------------------------------------------------------------------------------------------------------------------------------------------------------------------------------------------------------------------------------------------------------------------------------------------------------------------------------------------------------------------------------------------------------------------------------------------------------------------------------------------------------------------------------------------------------------------------------------------------------------------------------------------------------------------------------------------------------------------------------------------------------------------------------------------------------------------------------------------------------------------------------------------------------------------------------------------------|
| <b>Methods</b>       | FIT, a large randomized, placebo-controlled trial of alendronate, had two arms:<br>- the Vertebral Fracture Arm (average of 2.9 years of follow-up) and<br>- the Clinical Fracture Arm (average of 50 months of follow-up).<br>11 metropolitan areas in the United States of America using population-based listings                                                                                                                                                                                                                                                                                                                                                                                                                                                                                                                                                                                                                                                                                                                    |
| <b>Participants</b>  | 6082 women (94.2%) were included in this analysis, whom were randomized and had lateral spine radiographs at baseline and at least one additional visit.<br>Inclusion criteria: Women between the ages of 55 and 81 years, that had femoral neck BMD of 0.68 g/cm or less (measured by Hologic Model QDR-2000, Waltham, MA), and had been postmenopausal for at least 2 years. The femoral neck BMD cutoff used corresponds to approximately 1.6 SD below the mean for young white women.<br>Exclusion criteria: Women were excluded if they had active serious peptic ulcer disease during the past year, a recent history of abnormal renal function, uncontrolled hypertension, severe malabsorption, myocardial infarction during the previous 6 months, unstable angina, or medical problems that would interfere with participation for the 3–4 year study duration. Women who had used fluoride or bisphosphonates at any time in the past, or had used estrogen or calcitonin during the previous 6 months, were also excluded. |
| <b>Interventions</b> | Intervention: alendronate 5mg/day for the first 24 months, followed by 10 mg/day for the rest of the period (N=3040)<br>Control: placebo (N=3042)                                                                                                                                                                                                                                                                                                                                                                                                                                                                                                                                                                                                                                                                                                                                                                                                                                                                                       |
| <b>Outcomes</b>      | Vertebral fractures                                                                                                                                                                                                                                                                                                                                                                                                                                                                                                                                                                                                                                                                                                                                                                                                                                                                                                                                                                                                                     |

#### Quandt 2005

|                     |                                                                                                                                                                                                                          |
|---------------------|--------------------------------------------------------------------------------------------------------------------------------------------------------------------------------------------------------------------------|
| <b>Methods</b>      | FIT had 2 arms:<br>FIT I – women with a vertebral fracture at baseline<br>FIT II – women without a vertebral fracture<br>11 clinical centers in the USA<br>Participants were followed up to 4.5 years (mean 3.8 years).  |
| <b>Participants</b> | N=3737<br>Inclusion criteria: women from FIT I and FIT II who had a diagnosis consistent with the World Health Organization definition of osteopenia (a femoral neck BMD T score of -1.6 or less but greater than -2.5). |

|                      |                                                                                                                                          |
|----------------------|------------------------------------------------------------------------------------------------------------------------------------------|
| <b>Interventions</b> | Intervention: alendronate 5mg/day for the first 2 years and by 10 mg/day for the rest of the study (N=1878)<br>Control: placebo (N=1859) |
| <b>Outcomes</b>      | Vertebral fractures                                                                                                                      |

#### Ryder 2008

|                      |                                                                                                                                                                                                      |
|----------------------|------------------------------------------------------------------------------------------------------------------------------------------------------------------------------------------------------|
| <b>Methods</b>       | Posthoc analysis using data from FIT II (the study arm that included women without prevalent vertebral deformity at baseline).<br>11 clinical sites in the USA                                       |
| <b>Participants</b>  | N=2785<br>Inclusion criteria: women enrolled in FIT II without vertebral deformity had a femoral neck T-score above -2.5.                                                                            |
| <b>Interventions</b> | Intervention: alendronate for up to 54 months (5 mg/day for the first 2 years, and then increased to 10 mg/day at the second annual visit) (N=1389)<br>Control: placebo for up to 54 months (N=1396) |
| <b>Outcomes</b>      | Non-vertebral fractures                                                                                                                                                                              |

#### van de Glind 2016

|                      |                                                                                                                                                                                                                                 |
|----------------------|---------------------------------------------------------------------------------------------------------------------------------------------------------------------------------------------------------------------------------|
| <b>Methods</b>       | FIT, a RCT, parallel group                                                                                                                                                                                                      |
| <b>Participants</b>  | N=3658<br>Inclusion criteria: all patients (n = 3658) with confirmed osteoporosis [either a femoral neck bone mineral density (BMD) T score $\leq -2.5$ (n = 1631) or at least one morphometric vertebral fracture (n = 2027)]. |
| <b>Interventions</b> | Intervention: alendronate (N=1841)<br>Control: placebo (N=1817)                                                                                                                                                                 |
| <b>Outcomes</b>      | Clinical fractures                                                                                                                                                                                                              |

### The FPT (The Fracture Prevention Trial)

#### Boonen 2006

|                     |                                                                                                                                                                                                                                                                                                                                                                                                                                                                                                                                                                                    |
|---------------------|------------------------------------------------------------------------------------------------------------------------------------------------------------------------------------------------------------------------------------------------------------------------------------------------------------------------------------------------------------------------------------------------------------------------------------------------------------------------------------------------------------------------------------------------------------------------------------|
| <b>Methods</b>      | FPT, a RCT, parallel group<br>99 centers in 17 countries                                                                                                                                                                                                                                                                                                                                                                                                                                                                                                                           |
| <b>Participants</b> | N=1085<br>Inclusion criteria: postmenopausal women aged 42 to 86 were enrolled in the study. Study protocol required that the patients be ambulatory, at least 5 years postmenopausal, and free of other major diseases and have had at least one moderate or two mild atraumatic vertebral fractures.<br>Exclusion criteria: women with illnesses that affect bone or calcium metabolism, urolithiasis within the preceding 5 years, impaired hepatic function, a serum creatinine concentration exceeding 2 mg per deciliter (177 $\mu\text{mol}$ per liter), or alcohol or drug |

|                      |                                                                                                                                    |
|----------------------|------------------------------------------------------------------------------------------------------------------------------------|
|                      | abuse, as well as women who had taken drugs that alter bone metabolism within the previous 2 to 24 months (depending on the drug). |
|                      | Treatment duration: median of 19 months                                                                                            |
| <b>Interventions</b> | Intervention: teriparatide 20 µg, daily self-injection (N=541)<br>Control: placebo, daily self-injection (N=544)                   |
| <b>Outcomes</b>      | Vertebral and non-vertebral fractures                                                                                              |

#### Chen 2006

|                      |                                                                                                                                                                                                                                                                                                                                                                                                                                                                                                                                                                                                                                                                                                                                                                                                                                                                                                                                                                                                                                                                                                                                                                                                   |
|----------------------|---------------------------------------------------------------------------------------------------------------------------------------------------------------------------------------------------------------------------------------------------------------------------------------------------------------------------------------------------------------------------------------------------------------------------------------------------------------------------------------------------------------------------------------------------------------------------------------------------------------------------------------------------------------------------------------------------------------------------------------------------------------------------------------------------------------------------------------------------------------------------------------------------------------------------------------------------------------------------------------------------------------------------------------------------------------------------------------------------------------------------------------------------------------------------------------------------|
| <b>Methods</b>       | Posthoc analysis using data from FPT<br>99 centers in 17 countries                                                                                                                                                                                                                                                                                                                                                                                                                                                                                                                                                                                                                                                                                                                                                                                                                                                                                                                                                                                                                                                                                                                                |
| <b>Participants</b>  | 1637 ambulatory, postmenopausal were included in the FPT<br>In this analysis were included all subjects that had a spine BMD measurement at baseline and 18 months and lateral spine radiographs at baseline and study endpoint.<br>Inclusion criteria: Women were ambulatory, if a period of at least five years had elapsed since menopause, and if they had at least one moderate or two mild atraumatic vertebral fractures on radiographs of the thoracic and lumbar spine, and an ambulatory status. <sup>6</sup> For women with fewer than two moderate fractures, an additional criterion for enrollment was a value for bone mineral density of the hip or lumbar spine that was at least 1 SD below the mean value in normal premenopausal white women (age range, 20 to 35 years).<br>Exclusion criteria: Women with illnesses that affect bone or calcium metabolism, urolithiasis within the preceding 5 years, impaired hepatic function, a serum creatinine concentration exceeding 2 mg per deciliter (177 µmol per liter), or alcohol or drug abuse, as well as women who had taken drugs that alter bone metabolism within the previous 2 to 24 months (depending on the drug). |
| <b>Interventions</b> | Treatment duration: 24 months<br>Intervention: teriparatide 20µg or 40µg per day, self-administered subcutaneous injections (N=860)<br>Control: placebo, daily self-administered subcutaneous injections (N= 439)                                                                                                                                                                                                                                                                                                                                                                                                                                                                                                                                                                                                                                                                                                                                                                                                                                                                                                                                                                                 |
| <b>Outcomes</b>      | Vertebral fractures, stratified analysis on LS BMD                                                                                                                                                                                                                                                                                                                                                                                                                                                                                                                                                                                                                                                                                                                                                                                                                                                                                                                                                                                                                                                                                                                                                |

#### Delmas 2006

|                     |                                                                                                                                                                                                                                                                                                                                                                                                                                                                              |
|---------------------|------------------------------------------------------------------------------------------------------------------------------------------------------------------------------------------------------------------------------------------------------------------------------------------------------------------------------------------------------------------------------------------------------------------------------------------------------------------------------|
| <b>Methods</b>      | FPT<br>99 centers in 17 countries<br>1637 ambulatory, postmenopausal women ranging in age from 42 to 86 years were included in FPT                                                                                                                                                                                                                                                                                                                                           |
| <b>Participants</b> | Two subsets of participants, partially overlapping, were included in this analysis:<br>- Four BTM subset: 520 women had four bone turnover markers (BTM) assessed (Serum concentrations of two bone formation markers - bone-specific alkaline phosphatase [BSAP], and the carboxy-terminal extension peptide of procollagen type I [PICP]) and urinary concentrations of two bone resorption markers (free deoxyypyridinoline [DPD], and N-terminal telopeptide [NTX]), and |



|                      |                                                                                                                                                                                                                                                                                                                                                                                                                                                                                                                                                                                                                                                                                                                                                                                                                                                                                                                                                                                                                                                                                                                                                                       |
|----------------------|-----------------------------------------------------------------------------------------------------------------------------------------------------------------------------------------------------------------------------------------------------------------------------------------------------------------------------------------------------------------------------------------------------------------------------------------------------------------------------------------------------------------------------------------------------------------------------------------------------------------------------------------------------------------------------------------------------------------------------------------------------------------------------------------------------------------------------------------------------------------------------------------------------------------------------------------------------------------------------------------------------------------------------------------------------------------------------------------------------------------------------------------------------------------------|
|                      | <p>- The PINP subset: 771 participants who had serum collected at baseline, for which the concentration of amino-terminal extension peptide of procollagen type I [PINP] could be assessed.</p> <p>Inclusion criteria: ambulatory women, if a period of at least five years had elapsed since menopause, and if they had at least one moderate or two mild atraumatic vertebral fractures on radiographs of the thoracic and lumbar spine, and an ambulatory status. For women with fewer than two moderate fractures, an additional criterion for enrollment was a value for bone mineral density of the hip or lumbar spine that was at least 1 SD below the mean value in normal premenopausal white women (age range, 20 to 35 years).</p> <p>Exclusion criteria: women with illnesses that affect bone or calcium metabolism, urolithiasis within the preceding 5 years, impaired hepatic function, a serum creatinine concentration exceeding 2 mg per deciliter (177 <math>\mu</math>mol per liter), or alcohol or drug abuse, as well as women who had taken drugs that alter bone metabolism within the previous 2 to 24 months (depending on the drug).</p> |
| <b>Interventions</b> | <p>Median duration of exposure to teriparatide was 19 months.</p> <p>Intervention: teriparatide 20 mcg or 40 mcg per day, daily self-administered subcutaneous injections (Four BTM subset: N=345; the PINP subset N= 511)</p> <p>Control: placebo, daily self-administered subcutaneous injections (Four BTM subset: N=175; the PINP subset N=260)</p>                                                                                                                                                                                                                                                                                                                                                                                                                                                                                                                                                                                                                                                                                                                                                                                                               |
| <b>Outcomes</b>      | Major osteoporotic fractures, vertebral and non-vertebral fractures                                                                                                                                                                                                                                                                                                                                                                                                                                                                                                                                                                                                                                                                                                                                                                                                                                                                                                                                                                                                                                                                                                   |

#### Gallagher 2005

|                      |                                                                                                                                                                                                                                                                                                                                                                                                                                                                                                                                                                                                                                                                                                                                                                                                                                                                                                                                                                              |
|----------------------|------------------------------------------------------------------------------------------------------------------------------------------------------------------------------------------------------------------------------------------------------------------------------------------------------------------------------------------------------------------------------------------------------------------------------------------------------------------------------------------------------------------------------------------------------------------------------------------------------------------------------------------------------------------------------------------------------------------------------------------------------------------------------------------------------------------------------------------------------------------------------------------------------------------------------------------------------------------------------|
| <b>Methods</b>       | Analysis with data from women that participated in the FPT study                                                                                                                                                                                                                                                                                                                                                                                                                                                                                                                                                                                                                                                                                                                                                                                                                                                                                                             |
| <b>Participants</b>  | <p>N=931 - postmenopausal women with baseline radiographs were included in this analysis; of those 91 did not have a vertebral fracture.</p> <p>Inclusion criteria: ambulatory women at least 5 yr past menopause who had at least one moderate or two mild atraumatic vertebral fractures. For women who had fewer than two moderate vertebral fractures, an additional inclusion criterion included bone mineral density (BMD) of the lumbar spine or proximal femur at least 1 SD below the mean value in healthy young (20 –35 yr old) white women.</p> <p>Exclusion criteria: Women with diseases related to bone or calcium metabolism, urolithiasis within the preceding 2 yr, alcohol or drug abuse, impaired hepatic function, or a serum creatinine concentration of 177 <math>\mu</math>M or higher were excluded from the study. Women who had taken drugs affecting bone metabolism within the past 2–24 months, depending on the drug, were also excluded.</p> |
| <b>Interventions</b> | <p>Median of 19 months of treatment</p> <p>Intervention: teriparatide 20 <math>\mu</math>g, daily self-administered subcutaneous injections (N=467)</p> <p>Control: placebo, daily self-administered subcutaneous injections (N=464)</p>                                                                                                                                                                                                                                                                                                                                                                                                                                                                                                                                                                                                                                                                                                                                     |
| <b>Outcomes</b>      | Vertebral and non-vertebral fractures                                                                                                                                                                                                                                                                                                                                                                                                                                                                                                                                                                                                                                                                                                                                                                                                                                                                                                                                        |

#### Harvey 2015

|                |                                                                                                                                                                  |
|----------------|------------------------------------------------------------------------------------------------------------------------------------------------------------------|
| <b>Methods</b> | Analysis with data from the FPT study, a pivotal global, phase 3, multicentre, double-blind, calcium- and vitamin D-controlled, randomized study of teriparatide |
|----------------|------------------------------------------------------------------------------------------------------------------------------------------------------------------|

|                      |                                                                                                                                                                                              |
|----------------------|----------------------------------------------------------------------------------------------------------------------------------------------------------------------------------------------|
| <b>Participants</b>  | Inclusion criteria: ambulatory postmenopausal women<br>Exclusion criteria:                                                                                                                   |
| <b>Interventions</b> | Intervention: teriparatide 20 µg/day or 40 µg/ day, for a mean duration of 18±6 and 17±6 months, respectively (N=1093)<br>Control: placebo daily, for a mean duration of 18±5 months (N=544) |
| <b>Outcomes</b>      | Major osteoporotic fractures, vertebral and non-vertebral fractures                                                                                                                          |

#### Krege 2012

|                      |                                                                                                                                                                                                      |
|----------------------|------------------------------------------------------------------------------------------------------------------------------------------------------------------------------------------------------|
| <b>Methods</b>       | Posthoc analysis using data from the FPT study, which was a randomized, double-blinded, placebo-controlled trial<br>Median follow-up of 21 months                                                    |
| <b>Participants</b>  | Inclusion criteria: postmenopausal women with osteoporosis and vertebral fractures                                                                                                                   |
| <b>Interventions</b> | Intervention: daily subcutaneous self-injections of teriparatide 20 µg for a median of 19 months (N=541)<br>Control: daily subcutaneous self-injections of placebo for a median of 19 months (N=544) |
| <b>Outcomes</b>      | Non-vertebral fractures                                                                                                                                                                              |

#### Lindsay 2009

|                      |                                                                                                                                                                                                                                                                                                                                                                                                                                                                                                                                                                                         |
|----------------------|-----------------------------------------------------------------------------------------------------------------------------------------------------------------------------------------------------------------------------------------------------------------------------------------------------------------------------------------------------------------------------------------------------------------------------------------------------------------------------------------------------------------------------------------------------------------------------------------|
| <b>Methods</b>       | Posthoc analysis of data from the FPT study                                                                                                                                                                                                                                                                                                                                                                                                                                                                                                                                             |
| <b>Participants</b>  | Inclusion criteria: Women were required to be at least 5 years postmenopausal with at least one moderate or two mild atraumatic vertebral fractures. Women with fewer than two moderate vertebral fractures were required to have lumbar spine or hip T score of -1 or below.<br>Exclusion criteria: diagnosis with any disease known to affect bone or calcium metabolism, urolithiasis within 2 years, serum creatinine level greater than 2 mg/dl, alcohol or drug abuse, or medication use known to alter bone metabolism within the previous 2 to 24 months depending on the drug. |
| <b>Interventions</b> | Intervention 1: once-daily subcutaneous injections of teriparatide 20 µg (N=541)<br>Intervention 2: once-daily subcutaneous injections of teriparatide 40 µg (N=552)<br>Control: once-daily subcutaneous injections of placebo (N=544)                                                                                                                                                                                                                                                                                                                                                  |
| <b>Outcomes</b>      | Vertebral and non-vertebral fractures                                                                                                                                                                                                                                                                                                                                                                                                                                                                                                                                                   |

#### Marcus 2003

|                     |                                                                                                                                                                                                                                                                                                                                                                                                           |
|---------------------|-----------------------------------------------------------------------------------------------------------------------------------------------------------------------------------------------------------------------------------------------------------------------------------------------------------------------------------------------------------------------------------------------------------|
| <b>Methods</b>      | FPT study                                                                                                                                                                                                                                                                                                                                                                                                 |
| <b>Participants</b> | 1637 ambulatory postmenopausal women were enrolled in FPT study<br>Inclusion criteria: postmenopausal women at least 5 years beyond menopause and had a minimum of either one moderate or two mild atraumatic vertebral fractures and a minimum of seven evaluable nonfractured vertebrae on baseline spinal radiographs. Women with fewer than two moderate fractures were also included if their hip or |

|                      |                                                                                                                                                                                                                                                                                                                                                                                                                                                                                                                                                                           |
|----------------------|---------------------------------------------------------------------------------------------------------------------------------------------------------------------------------------------------------------------------------------------------------------------------------------------------------------------------------------------------------------------------------------------------------------------------------------------------------------------------------------------------------------------------------------------------------------------------|
|                      | <p>vertebral BMD values were less than 1 SD below the mean value for normal premenopausal white women (i.e., T score &lt; -1.0).</p> <p>Exclusion criteria: Women with diseases related to bone or calcium metabolism, urolithiasis within the preceding 5 years, alcohol or drug abuse, impaired hepatic function, a serum creatinine concentration <math>\geq 177 \mu\text{M}</math>, or had taken drugs affecting bone metabolism within the past 2–24 months.</p>                                                                                                     |
| <b>Interventions</b> | <p>Treatment duration: Rather than achieving the planned 36 months of teriparatide administration for all subjects, the median duration of drug exposure was 19 months with no subject exposed to drug for more than 25 months.</p> <p>Intervention 1: Teriparatide 20 <math>\mu\text{g}</math>, daily, self-administered subcutaneous injections (N=541)</p> <p>Intervention 2: Teriparatide 40 <math>\mu\text{g}</math>, daily, self-administered subcutaneous injections (N=552)</p> <p>Control: placebo, daily, self-administered subcutaneous injections (N=544)</p> |
| <b>Outcomes</b>      | Vertebral fractures                                                                                                                                                                                                                                                                                                                                                                                                                                                                                                                                                       |

#### Neer 2001

|                      |                                                                                                                                                                                                                                                                                                                                                                                                                                                                                                                                                                                                                                                                                                                                                                                                                                                                                                                                                                                                                                                                                  |
|----------------------|----------------------------------------------------------------------------------------------------------------------------------------------------------------------------------------------------------------------------------------------------------------------------------------------------------------------------------------------------------------------------------------------------------------------------------------------------------------------------------------------------------------------------------------------------------------------------------------------------------------------------------------------------------------------------------------------------------------------------------------------------------------------------------------------------------------------------------------------------------------------------------------------------------------------------------------------------------------------------------------------------------------------------------------------------------------------------------|
| <b>Methods</b>       | <p>FPT study: RCT, parallel group</p> <p>99 centers in 17 countries (United States, Australia, New Zealand, Canada, South America and in Europe)</p>                                                                                                                                                                                                                                                                                                                                                                                                                                                                                                                                                                                                                                                                                                                                                                                                                                                                                                                             |
| <b>Participants</b>  | <p>1637 women were randomized</p> <p>Inclusion criteria: Women were eligible for enrollment if they were ambulatory, if a period of at least five years had elapsed since menopause, and if they had at least one moderate or two mild atraumatic vertebral fractures on radiographs of the thoracic and lumbar spine, and an ambulatory status.<sup>6</sup> For women with fewer than two moderate fractures, an additional criterion for enrollment was a value for bone mineral density of the hip or lumbar spine that was at least 1 SD below the mean value in normal pre-menopausal white women (age range, 20 to 35 years).</p> <p>Exclusion criteria: We excluded women with illnesses that affect bone or calcium metabolism, urolithiasis within the preceding 5 years, impaired hepatic function, a serum creatinine concentration exceeding 2 mg per deciliter (177<math>\mu\text{mol}</math> per liter), or alcohol or drug abuse, as well as women who had taken drugs that alter bone metabolism within the previous 2 to 24 months (depending on the drug).</p> |
| <b>Interventions</b> | <p>Intervention 1: self-administered injections of parathyroid hormone (1-34) 20 <math>\mu\text{g}/\text{day}</math> for a mean (<math>\pm\text{SD}</math>) duration of treatment of 18<math>\pm</math>6 months (N=541)</p> <p>Intervention 2: self-administered injections of parathyroid hormone (1-34) 40 <math>\mu\text{g}/\text{day}</math> for a mean (<math>\pm\text{SD}</math>) duration of treatment of 17<math>\pm</math>6 months (N=552)</p> <p>Control: self-administered injections of placebo, daily for a mean (<math>\pm\text{SD}</math>) duration of treatment of 18<math>\pm</math>5 months (N=544)</p>                                                                                                                                                                                                                                                                                                                                                                                                                                                        |
| <b>Outcomes</b>      | Major, vertebral, non-vertebral and hip fractures                                                                                                                                                                                                                                                                                                                                                                                                                                                                                                                                                                                                                                                                                                                                                                                                                                                                                                                                                                                                                                |

#### Prevrhal 2009

|                |                                                         |
|----------------|---------------------------------------------------------|
| <b>Methods</b> | <p>FPT study</p> <p>Median observation of 21 months</p> |
|----------------|---------------------------------------------------------|

|                      |                                                                                                                                                                                                                            |
|----------------------|----------------------------------------------------------------------------------------------------------------------------------------------------------------------------------------------------------------------------|
| <b>Participants</b>  | Inclusion criteria: Postmenopausal women with osteoporosis, who were included in the FPT study, specifically included in the placebo and teriparatide 20g/day group and that had a baseline and endpoint spine radiograph. |
| <b>Interventions</b> | Treatment duration: median study drug exposure of 19 months<br>Intervention: Teriparatide 20 µg, daily, self-injection (N=444)<br>Control: placebo, daily, self-injection (N=448)                                          |
| <b>Outcomes</b>      | Vertebral fractures                                                                                                                                                                                                        |

#### Watts 2009

|                      |                                                                                                                                                                                                                                                                                                                                                                                                                                                                                                                                                                                                                                                                                                                                                                                                                                                                                                                                                                                                                    |
|----------------------|--------------------------------------------------------------------------------------------------------------------------------------------------------------------------------------------------------------------------------------------------------------------------------------------------------------------------------------------------------------------------------------------------------------------------------------------------------------------------------------------------------------------------------------------------------------------------------------------------------------------------------------------------------------------------------------------------------------------------------------------------------------------------------------------------------------------------------------------------------------------------------------------------------------------------------------------------------------------------------------------------------------------|
| <b>Methods</b>       | FPT study – RCT, parallel group                                                                                                                                                                                                                                                                                                                                                                                                                                                                                                                                                                                                                                                                                                                                                                                                                                                                                                                                                                                    |
| <b>Participants</b>  | Inclusion criteria: Women were eligible for enrollment if they were ambulatory, if a period of at least five years had elapsed since menopause, and if they had at least one moderate or two mild atraumatic vertebral fractures on radiographs of the thoracic and lumbar spine, and an ambulatory status. <sup>6</sup> For women with fewer than two moderate fractures, an additional criterion for enrollment was a value for bone mineral density of the hip or lumbar spine that was at least 1 SD below the mean value in normal pre-menopausal white women (age range, 20 to 35 years).<br><br>Exclusion criteria: We excluded women with illnesses that affect bone or calcium metabolism, urolithiasis within the preceding 5 years, impaired hepatic function, a serum creatinine concentration exceeding 2 mg per deciliter (177µmol per liter), or alcohol or drug abuse, as well as women who had taken drugs that alter bone metabolism within the previous 2 to 24 months (depending on the drug). |
| <b>Interventions</b> | Treatment duration: median duration of exposure of 19 mo<br>Intervention 1: 20 µg of recombinant human parathyroid hormone (1-34) in a regimen of daily, self-administered injection (N=541)<br>Intervention 2: 40 µg of recombinant human parathyroid hormone (1-34) in a regimen of daily, self-administered injection (N=552)<br>Control: placebo (N=544)                                                                                                                                                                                                                                                                                                                                                                                                                                                                                                                                                                                                                                                       |
| <b>Outcomes</b>      | Vertebral fractures                                                                                                                                                                                                                                                                                                                                                                                                                                                                                                                                                                                                                                                                                                                                                                                                                                                                                                                                                                                                |

#### The Chinese osteoporosis study and the FPT

##### Xie 2019

|                     |                                                                                                                                                                                                                                                                                                                                                                    |
|---------------------|--------------------------------------------------------------------------------------------------------------------------------------------------------------------------------------------------------------------------------------------------------------------------------------------------------------------------------------------------------------------|
| <b>Methods</b>      | Post-hoc analysis using data from 2 studies:<br>- Chinese osteoporosis study (NCT00414973): Chinese, open-labeled, multicenter, active comparator, randomized phase III study, carried out at 10 study centers<br>- FPT (NCT00670501): Global, phase III, multicenter, double-blind, placebo-controlled, randomized study, conducted in 99 centers in 17 countries |
| <b>Participants</b> | Inclusion criteria:<br>Only those who met the selection criteria for both the FPT and the Chinese study were considered: patients who were female with osteoporosis at high risk of fracture, aged ≥55 years, and had no history of rheumatoid arthritis or use of corticosteroids.<br><br>Inclusion criteria specific of each study:                              |

- Chinese osteoporosis study: Ambulatory men (aged 40–85 years) or women (aged 55–85 years and at least 3 years postmenopause). Established osteoporosis based on experiencing a fragility fracture prior to enrollment or T-score BMD <2.5 at LS or hip
- FPT: Ambulatory women aged 35–80 years and at least 5 years postmenopause. Minimum of one moderate or two mild atraumatic vertebral fractures prior to enrollment. For those with <2 moderate fractures, or a T-score BMD of <1.0 at LS or hip.

Exclusion criteria specific of each study:

- Chinese osteoporosis study: Disease or medication (eg, corticosteroid) that affect bone metabolism. Impaired renal/hepatic function. Skeletal radiotherapy. Malignant neoplasm within 5 years.
- FPT: Disease or medication (eg, corticosteroid) that affects bone metabolism. Impaired renal/hepatic function. Urolithiasis within 5 years. Drug or alcohol abuse.

Duration:

- Chinese osteoporosis study: 24 weeks of treatment
- FPT: median of 19 months of treatment

Chinese osteoporosis study (N=228):

**Interventions** Intervention: Teriparatide 20 µg once daily administered via subcutaneous injection  
Control: Salmon calcitonin 200 IU once daily administered intranasally

FPT (N=228):

Intervention: Teriparatide 20 µg or 40 µg once daily administered subcutaneously  
Control: Placebo

**Outcomes** Clinical fractures

## The FRAME (The FRActure study in postmenopausal woMen with ostEoporosis) Trial

Cosman 2016

|                     |                                                                                                                                                                                                                                                                                                                                                                                                                                                                                                                                                                                                                                                                                                                                                                                                                                                                                                                                         |
|---------------------|-----------------------------------------------------------------------------------------------------------------------------------------------------------------------------------------------------------------------------------------------------------------------------------------------------------------------------------------------------------------------------------------------------------------------------------------------------------------------------------------------------------------------------------------------------------------------------------------------------------------------------------------------------------------------------------------------------------------------------------------------------------------------------------------------------------------------------------------------------------------------------------------------------------------------------------------|
| <b>Methods</b>      | FRAME: RCT, parallel group                                                                                                                                                                                                                                                                                                                                                                                                                                                                                                                                                                                                                                                                                                                                                                                                                                                                                                              |
| <b>Participants</b> | <p>N=7180</p> <p>6390 patients (89.0%) completed 12 months of the trial, and 6026 (83.9%) completed 24 months.</p> <p>Inclusion criteria: Ambulatory postmenopausal women, 55 to 90 years of age, with a T score of -2.5 to -3.5 at the total hip or femoral neck were eligible for participation.</p> <p>Exclusion criteria: Patients had to have at least two vertebrae in the L1 through L4 region and at least one hip that could be evaluated by means of dual-energy x-ray absorptiometry. Women who had a history of hip fracture, any severe or more than two moderate vertebral fractures, a history of metabolic bone disease or conditions affecting bone metabolism, osteonecrosis of the jaw, a 25-hydroxyvitamin D level of less than 20 ng per milliliter, current hypercalcemia or hypocalcemia, or recent use of drugs affecting bone metabolism (within defined washout periods; see the protocol) were excluded.</p> |

|                      |                                                                                                                                                                                                                                                                                                                                                                                                             |
|----------------------|-------------------------------------------------------------------------------------------------------------------------------------------------------------------------------------------------------------------------------------------------------------------------------------------------------------------------------------------------------------------------------------------------------------|
| <b>Interventions</b> | Intervention: romosozumab 210 mg subcutaneous administration once monthly for 12 months followed by open-label denosumab 60 mg subcutaneous administration every 6 months for additional 12 months (N=3321)<br>Control: placebo, subcutaneous administration once monthly for 12 months followed by open-label denosumab 60 mg subcutaneous administration every 6 months for additional 12 months (N=3322) |
| <b>Outcomes</b>      | Clinical, vertebral and non-vertebral fractures                                                                                                                                                                                                                                                                                                                                                             |

#### Cosman 2018

|                      |                                                                                                                                                                                                                                                                                                                                                                                                                                                                                                                                                                                                                                                                                                                                                                                                                         |
|----------------------|-------------------------------------------------------------------------------------------------------------------------------------------------------------------------------------------------------------------------------------------------------------------------------------------------------------------------------------------------------------------------------------------------------------------------------------------------------------------------------------------------------------------------------------------------------------------------------------------------------------------------------------------------------------------------------------------------------------------------------------------------------------------------------------------------------------------------|
| <b>Methods</b>       | Secondary, posthoc analysis based on FRAME: (ClinicalTrials.gov, NCT01575834), a phase 3, international, randomized, double-blind, placebo-controlled, parallel-group trial.<br>For fracture efficacy, the current analysis focused on the RRRs in FRAME in the second year alone, when all patients were treated with the same active therapy—denosumab.                                                                                                                                                                                                                                                                                                                                                                                                                                                               |
| <b>Participants</b>  | 7180 postmenopausal women with osteoporosis were included in the FRAME study.<br>Inclusion criteria: Women were eligible for this study if they were between 55 and 90 years old, had a T-score of –2.5 to –3.5 at the total hip or femoral neck, and at least two vertebrae in the L1 through L4 region and at least one hip that could be evaluated by DXA.<br>Exclusion criteria: Women who had a history of hip fracture, any severe or more than two moderate vertebral fractures, a history of metabolic bone disease or conditions affecting bone metabolism, osteonecrosis of the jaw, a 25-hydroxyvitamin D level of less than 20 ng per milliliter, current hypercalcemia or hypocalcemia, or recent use of drugs affecting bone metabolism (within defined washout periods; see the protocol) were excluded. |
| <b>Interventions</b> | Intervention: romosozumab 210 mg, s.c. once monthly for 12 months (N= unclear)<br>Control: placebo, s.c. once monthly for 12 months (N= unclear)<br>Both treatment groups transitioned to denosumab 60 mg s.c. once every 6 months for an additional 12 months.                                                                                                                                                                                                                                                                                                                                                                                                                                                                                                                                                         |
| <b>Outcomes</b>      | Clinical, major osteoporotic, vertebral, non-vertebral and hip fractures                                                                                                                                                                                                                                                                                                                                                                                                                                                                                                                                                                                                                                                                                                                                                |

#### Cosman 2018

|                     |                                                                                                                                                                                                                                                                                                                                                                                                                                                                                                                                                                                                                                 |
|---------------------|---------------------------------------------------------------------------------------------------------------------------------------------------------------------------------------------------------------------------------------------------------------------------------------------------------------------------------------------------------------------------------------------------------------------------------------------------------------------------------------------------------------------------------------------------------------------------------------------------------------------------------|
| <b>Methods</b>      | Posthoc analysis using the FRAME study: (ClinicalTrials.gov, NCT01575834), an international, randomized, double-blind, placebo-controlled, parallel-group, phase 3 study.<br>Latin America, Central/Eastern Europe, Western Europe and Australia/New Zealand, Asia Pacific and North America                                                                                                                                                                                                                                                                                                                                    |
| <b>Participants</b> | 7180 women were included, from which 6390 (89%) completed 12 months of study<br>The highest enrolling region was Latin America (43%) (vs. Rest-of-world (57%): non-Latin American population combined, which included Central/Eastern Europe, Western Europe and Australia/New Zealand and Asia Pacific)<br>Inclusion criteria: ambulatory postmenopausal women, 55 to 90 years old, with a T-score of –2.5 to –3.5 at the total hip or femoral neck<br>Exclusion criteria: history of hip fracture, any severe or more than two moderate vertebral fractures, a history of metabolic bone disease or conditions affecting bone |

|                      |                                                                                                                                                                                                                                                                                                                                        |
|----------------------|----------------------------------------------------------------------------------------------------------------------------------------------------------------------------------------------------------------------------------------------------------------------------------------------------------------------------------------|
|                      | metabolism, osteonecrosis of the jaw, a 25-hydroxyvitamin D level of less than 20 ng per milliliter, current hypercalcemia or hypocalcemia, or recent use of drugs affecting bone metabolism (within defined washout periods; see the protocol). Any severe or more than two moderate vertebral fractures, or history of hip fracture. |
| <b>Interventions</b> | Intervention: romosozumab 210 mg, sc monthly for 12 months (Latin America N=1550, Rest-of-world N=2039)<br>Control: placebo, sc monthly for 12 months (Latin America N=1534, Rest-of-world N=2057)<br>For both treatment groups: followed by open-label denosumab 60 mg, s.c. every 6 months for an additional 12 months.              |
| <b>Outcomes</b>      | Clinical, major osteoporotic, vertebral, non-vertebral and hip fractures                                                                                                                                                                                                                                                               |

### McCloskey 2021

|                      |                                                                                                                                                                                                                                                                                                                  |
|----------------------|------------------------------------------------------------------------------------------------------------------------------------------------------------------------------------------------------------------------------------------------------------------------------------------------------------------|
| <b>Methods</b>       | Independent post hoc analysis of the phase 3 FRAME study (NCT01575834): international, double-blind, placebo-controlled, parallel group trial.                                                                                                                                                                   |
| <b>Participants</b>  | Inclusion criteria and exclusion criteria: not described in this paper.                                                                                                                                                                                                                                          |
| <b>Interventions</b> | Women with postmenopausal osteoporosis were randomly assigned to receive s.c once monthly for 12 months:<br>Intervention 1: romosozumab 210 mg<br>Control: placebo<br>Followed by open-label denosumab (Prolia, Amgen), at a dose of 60 mg which was administered s.c every 6 months for an additional 12 months |
| <b>Outcomes</b>      | Clinical fractures, osteoporotic fractures, major osteoporotic fractures, hip fractures, clinical vertebral fractures, nonvertebral fractures and morphometric vertebral fractures.                                                                                                                              |

## The FREEDOM (Fracture Reduction Evaluation of Denosumab in Osteoporosis Every 6 Months) study

### Adami 2012

|                      |                                                                                                                                                                                                                                                                                                                                                                          |
|----------------------|--------------------------------------------------------------------------------------------------------------------------------------------------------------------------------------------------------------------------------------------------------------------------------------------------------------------------------------------------------------------------|
| <b>Methods</b>       | The FREEDOM trial: a 3-year, international, randomized, double-blind, placebo-controlled trial<br>214 centers in Europe, North America, South America, Australia and New Zealand                                                                                                                                                                                         |
| <b>Participants</b>  | Data from 7808 women were available from the FREEDOM trial<br>N=7762 - women received at least one dose of study treatment<br>Inclusion criteria: women aged 60 to 90 years with a BMD T-score of -2.5 or less at the lumbar spine or total hip, but not less than -4.0 at either site.<br>Exclusion criteria: There were no exclusion criteria based on renal function. |
| <b>Interventions</b> | Treatment duration: 3 years<br>Intervention 1: Denosumab 60 mg, subcutaneous injection every 6 months (N=3886)<br>Control 1: Placebo, subcutaneous injection every 6 months (N=3876)                                                                                                                                                                                     |
| <b>Outcomes</b>      | Non-vertebral fractures                                                                                                                                                                                                                                                                                                                                                  |

### Austin 2012

|                      |                                                                                                                                                                                  |
|----------------------|----------------------------------------------------------------------------------------------------------------------------------------------------------------------------------|
| <b>Methods</b>       | The FREEDOM trial: multinational, randomized, double-blind trial<br>214 centers                                                                                                  |
| <b>Participants</b>  | N=7808<br>Inclusion criteria: postmenopausal women with a BMD T-score < -2.5 at the lumbar spine or total hip and not < -4.0 at either site.                                     |
| <b>Interventions</b> | Treatment duration: 3 years<br>Intervention: Denosumab 60 mg, subcutaneous injection every 6 months (N=3902)<br>Control: Placebo, subcutaneous injection every 6 months (N=3906) |
| <b>Outcomes</b>      | Vertebral and non-vertebral fractures                                                                                                                                            |

### Boonen 2011

|                     |                                                                                                                                                                                                                                                                                                                                                                                                                                                                                                                                        |
|---------------------|----------------------------------------------------------------------------------------------------------------------------------------------------------------------------------------------------------------------------------------------------------------------------------------------------------------------------------------------------------------------------------------------------------------------------------------------------------------------------------------------------------------------------------------|
| <b>Methods</b>      | The FREEDOM trial: 3-year, randomized, double-blind, placebo-controlled, phase 3 trial - posthoc analysis in subgroups of women at higher risk of new vertebral and hip fractures<br>213 sites worldwide                                                                                                                                                                                                                                                                                                                               |
| <b>Participants</b> | The FREEDOM study enrolled 7808 women.<br>Inclusion criteria: Ambulatory postmenopausal women with a BMD T-score less than -2.5 at the lumbar spine or total hip but not less than -4.0 at either site were eligible to enroll in this study. Women with two or more vertebral deformities could be eligible, as long as there were no severe vertebral deformities and at most two moderate vertebral deformities<br>Participants enrolled in both treatments were group according to their risk for new vertebral and hip fractures: |



- For new vertebral fractures the higher-risk subgroups included women with the following: 1) two or more preexisting vertebral fractures of any degree of deformity, or one or more vertebral fracture of moderate or severe deformity, or both (prevalent vertebral fracture status); 2) a femoral neck BMD T-score of -2.5 or less; or 3) both multiple and/or moderate or severe vertebral deformities and a femoral neck BMD T-score of -2.5 or less.

- For hip fractures the higher-risk subgroups included women: 1) 75 yr old or older; 2) with a femoral neck BMD T-score of -2.5 or less; or 3) 75 yr old or older and with a femoral neck BMD T-score of -2.5 or less.

Women who did not have the risk factor(s) specified were included in the lower-risk subgroups.

**Interventions**

Intervention: denosumab 60 mg, subcutaneous injection every 6 months (N=3886)  
Control: placebo, subcutaneous injection every 6 months (N=3876)

**Outcomes**

Vertebral and hip fractures. Vertebral fractures stratified by previous fracture risk

**Cummings 2009**

**Methods**

FREEDOM: RCT, parallel group

**Participants**

Inclusion criteria: Women between the ages of 60 and 90 years with a bone mineral density T score of less than -2.5 at the lumbar spine or total hip.

Exclusion criteria: Women were excluded if they had conditions that influence bone metabolism or had taken oral bisphosphonates for more than 3 years. If they had taken bisphosphonates for less than 3 years, they were eligible after 12 months without treatment. Women were also excluded if they had used intravenous bisphosphonates, fluoride, or strontium for osteoporosis within the past 5 years; or parathyroid hormone or its derivatives, corticosteroids, systemic hormone-replacement therapy, selective estrogen-receptor modulators, or tibolone, calcitonin, or calcitriol within 6 weeks before study enrollment. Although consensus conferences have not specified a permissible risk of fracture for placebo-controlled trials,<sup>9,10</sup> women were excluded if they had a bone mineral density T score of less than -4.0 at the lumbar spine or total hip or any severe (or more than two moderate) prevalent vertebral fractures. As part of the consent process, potential subjects were informed about alternative treatments for osteoporosis. Women were excluded if they had a serum 25-hydroxyvitamin D level of less than 12 ng per milliliter. Subjects with a baseline 25-hydroxyvitamin D level of 12 to 20 ng per milliliter were given at least 800 IU of vitamin D daily, and those with a baseline level above 20 ng per milliliter were given at least 400 IU daily. If total hip bone mineral density decreased by more than 7% during a 12-month period or by 10% or more during the study or if the T score dropped below -4.0, the subject was again counseled by the local study clinician about using alternative treatments in lieu of continuing to participate in the study.

**Interventions**

Treatment duration: 36 months  
Intervention: denosumab 60 mg, subcutaneous injections every 6 months (N=3902)  
Control: placebo, subcutaneous injections every 6 months (N=3906)

**Outcomes**

Vertebral, non-vertebral and hip fractures

### Jamal 2011

|                      |                                                                                                                                                                                                                                                                                                                                                                                                                                                                                                                           |
|----------------------|---------------------------------------------------------------------------------------------------------------------------------------------------------------------------------------------------------------------------------------------------------------------------------------------------------------------------------------------------------------------------------------------------------------------------------------------------------------------------------------------------------------------------|
| <b>Methods</b>       | FREEDOM Trial: a multicentre RCT                                                                                                                                                                                                                                                                                                                                                                                                                                                                                          |
| <b>Participants</b>  | N=7808<br>Inclusion criteria: Women between 60 and 90 years of age with a BMD T-score of greater than 4.0 and less than 2.5 at the lumbar spine or total hip.<br>Exclusion criteria: Women were excluded if they had current hyper- or hypoparathyroidism, current hypocalcemia (albumin-adjusted serum calcium concentration below 2.13 mmol/L) or vitamin D deficiency (25-hydroxyvitamin D level less than 30 nmol/L). There were no exclusion criteria based on serum measures of kidney function or urinary protein. |
| <b>Interventions</b> | Treatment duration: 36 months<br>Intervention: denosumab 60 mg, subcutaneously every 6 months (N=3902)<br>Control: placebo, subcutaneously every 6 months (N=3906)                                                                                                                                                                                                                                                                                                                                                        |
| <b>Outcomes</b>      | Vertebral and non-vertebral fractures                                                                                                                                                                                                                                                                                                                                                                                                                                                                                     |

### Kanis 2021

|                      |                                                                                                                                                                                                                                                                                                                                                           |
|----------------------|-----------------------------------------------------------------------------------------------------------------------------------------------------------------------------------------------------------------------------------------------------------------------------------------------------------------------------------------------------------|
| <b>Methods</b>       | The phase 3 “Fracture Reduction Evaluation of Denosumab in Osteoporosis Every 6 Months” (FREEDOM) study: a double-blind, randomized, placebo controlled trial<br>Multinational study of efficacy included women from Canada, Europe, Latin America, South America, and the USA                                                                            |
| <b>Participants</b>  | Inclusion criteria and exclusion criteria: not described in this paper.                                                                                                                                                                                                                                                                                   |
| <b>Interventions</b> | Intervention 1: 60-mg denosumab subcutaneously every 6 months for 36 months (N=3902)<br>Control: placebo subcutaneously every 6 months for 36 months (N=3906)<br>All women received supplements containing at least 1000 mg of calcium daily with vitamin D (400 to 800+ IU daily), the latter depending on the baseline serum 25-hydroxyvitamin D level. |
| <b>Outcomes</b>      | Vertebral, non-vertebral and hip fractures                                                                                                                                                                                                                                                                                                                |

### Kendler 2019

|                     |                                                                                                                                                                                                                                                                                                                                                                                 |
|---------------------|---------------------------------------------------------------------------------------------------------------------------------------------------------------------------------------------------------------------------------------------------------------------------------------------------------------------------------------------------------------------------------|
| <b>Methods</b>      | Posthoc analysis using data from the FREEDOM study, the placebo-controlled trial and its open-label extension<br>FREEDOM trial: an international, multicenter, randomized, double-blind, placebo-controlled<br>The FREEDOM Extension duration was up to 7 years, for a total of 10 years of denosumab treatment from the start of the FREEDOM study.                            |
| <b>Participants</b> | Inclusion criteria:<br>FREEDOM Trial - eligible women were postmenopausal, 60–90 years old, with a lumbar spine or total hip BMD T-score less than –2.5 at either site, but greater than or equal to –4.0 at both locations. Eligible women could not have had any severe, or more than two moderate, vertebral fractures and were free of other secondary causes of bone loss. |

|                      |                                                                                                                                                                                                                                                                                                                                                                                                                                              |
|----------------------|----------------------------------------------------------------------------------------------------------------------------------------------------------------------------------------------------------------------------------------------------------------------------------------------------------------------------------------------------------------------------------------------------------------------------------------------|
|                      | FREEDOM Extension - women who completed the FREEDOM study 3-year visit and did not discontinue or miss more than one dose of investigational product in either the denosumab or placebo arm.                                                                                                                                                                                                                                                 |
| <b>Interventions</b> | <p>FREEDOM Trial (3 years)</p> <p>Intervention: denosumab s.c. 60 mg every 6 months for 3 years (N=272)</p> <p>Control: placebo s.c. every 6 months (N=438)</p> <p>FREEDOM trial + Expansion (10 years)</p> <p>Patients who had received intervention or control during the trial period were scheduled to receive subcutaneous open-label denosumab 60 mg every 6 months (<math>\pm</math> 1 month) during the extension period (N=794)</p> |
| <b>Outcomes</b>      | Clinical, vertebral, non-vertebral and hip fractures                                                                                                                                                                                                                                                                                                                                                                                         |

### McCloskey 2012

|                      |                                                                                                                                                                                                                                                       |
|----------------------|-------------------------------------------------------------------------------------------------------------------------------------------------------------------------------------------------------------------------------------------------------|
| <b>Methods</b>       | <p>FREEDOM study: RCT, parallel group</p> <p>Canada, Europe, Latin America, South America, and the United States.</p>                                                                                                                                 |
| <b>Participants</b>  | <p>7808 women were included in FREEDOM study</p> <p>Inclusion criteria: women between the ages of 60 and 90 years (mean 72 years) who had a BMD T-score of less than -2.5 at the lumbar spine or total hip but not less than -4.0 at either site.</p> |
| <b>Interventions</b> | <p>Treatment duration: 36 months</p> <p>Intervention: Denosumab 60 mg, subcutaneously every 6 months (N=3902)</p> <p>Control: placebo, subcutaneously every 6 months (N=3906)</p>                                                                     |
| <b>Outcomes</b>      | Clinical and hip fractures                                                                                                                                                                                                                            |

### McClung 2012

|                      |                                                                                                                                                                                                                                                                                                                                                                                                                                                                                                                                                                                                                                                                  |
|----------------------|------------------------------------------------------------------------------------------------------------------------------------------------------------------------------------------------------------------------------------------------------------------------------------------------------------------------------------------------------------------------------------------------------------------------------------------------------------------------------------------------------------------------------------------------------------------------------------------------------------------------------------------------------------------|
| <b>Methods</b>       | <p>FREEDOM study: RCT, parallel group</p> <p>Ambulatory, international and multicenter.</p>                                                                                                                                                                                                                                                                                                                                                                                                                                                                                                                                                                      |
| <b>Participants</b>  | <p>7808 women were included in FREEDOM study, the majority was white.</p> <p>Inclusion criteria: women aged 60 to 90 years with a BMD T-score <math>&lt;</math>-2.5 at either the lumbar spine or total hip and <math>\geq</math>-4.0 at both sites. subjects with <math>\leq</math>3 years of oral bisphosphonate use and no use within 1 year of enrollment could enroll in the study.</p> <p>Exclusion criteria: Women with more than two moderate vertebral fractures or any severe vertebral fracture, assessed by the semi quantitative grading of lateral spine radiographs. Subjects who had used oral bisphosphonates for <math>&gt;</math>3 years.</p> |
| <b>Interventions</b> | <p>Treatment duration: 3 years</p> <p>Intervention: Denosumab 60 mg, subcutaneous injections every 6 months (N=3902)</p> <p>Control: placebo, subcutaneous injections every 6 months (N=3906)</p>                                                                                                                                                                                                                                                                                                                                                                                                                                                                |
| <b>Outcomes</b>      | Vertebral and non-vertebral fractures                                                                                                                                                                                                                                                                                                                                                                                                                                                                                                                                                                                                                            |

## Palacios 2015

|                      |                                                                                                                                                                                                                                                                                                                                                                                                                                                                                                                                                                                                                                                                                                                                                                                                                                           |
|----------------------|-------------------------------------------------------------------------------------------------------------------------------------------------------------------------------------------------------------------------------------------------------------------------------------------------------------------------------------------------------------------------------------------------------------------------------------------------------------------------------------------------------------------------------------------------------------------------------------------------------------------------------------------------------------------------------------------------------------------------------------------------------------------------------------------------------------------------------------------|
| <b>Methods</b>       | Post-hoc analysis of the FREEDOM study                                                                                                                                                                                                                                                                                                                                                                                                                                                                                                                                                                                                                                                                                                                                                                                                    |
| <b>Participants</b>  | <p>7808 women were included in the FREEDOM study</p> <p>Inclusion criteria: Women aged 60–90 years with a bone mineral density (BMD) T-score of less than -2.5 but not less than -4.0 at either the lumbar spine or total hip; women with previous therapy for osteoporosis were eligible as long as they had not used intravenous bisphosphonates or strontium within the past 5 years; an oral bisphosphonate for more than 3 years; or parathyroid hormone or its derivatives, systemic hormone replacement therapy, or selective estrogen receptor modulators within 6 weeks before study enrolment. If they had taken bisphosphonates for less than 3 years, they were eligible after 12 months without treatment.</p> <p>Exclusion criteria: women that had any severe or more than two moderate prevalent vertebral fractures.</p> |
| <b>Interventions</b> | <p>Treatment duration: 36 months</p> <p>Intervention: Denosumab 60 mg, subcutaneous injections every 6 months (N=3900)</p> <p>Control: placebo, subcutaneous injections every 6 months (N=3903)</p>                                                                                                                                                                                                                                                                                                                                                                                                                                                                                                                                                                                                                                       |
| <b>Outcomes</b>      | Clinical fractures, analysis stratified by previous fracture history and by age                                                                                                                                                                                                                                                                                                                                                                                                                                                                                                                                                                                                                                                                                                                                                           |

## Simon 2013

|                      |                                                                                                                                                                                                                                                                                                                                                                                                                                                                                                                                            |
|----------------------|--------------------------------------------------------------------------------------------------------------------------------------------------------------------------------------------------------------------------------------------------------------------------------------------------------------------------------------------------------------------------------------------------------------------------------------------------------------------------------------------------------------------------------------------|
| <b>Methods</b>       | <p>Data from FREEDOM study, specifically: the DXA sub study, the QCT radius sub study and overall FREEDOM study.</p> <p>International, multicenter</p>                                                                                                                                                                                                                                                                                                                                                                                     |
| <b>Participants</b>  | <p>Inclusion criteria: postmenopausal women aged 60 to 90 years with a DXA BMD T-score lower than -2.5 at the lumbar spine or total hip.</p> <p>Exclusion criteria: women that had a BMD T-score lower than -4.0 at either site, any severe vertebral fracture or more than two moderate vertebral fractures, or conditions that affect bone metabolism; had taken oral bisphosphonates for more than 3 years; or had received intravenous bisphosphonates, fluoride, or strontium treatment for osteoporosis within the last 5 years.</p> |
| <b>Interventions</b> | <p>Treatment duration: 36 months</p> <p>Intervention: denosumab 60 mg, subcutaneous injections every 6 months (N=3902)</p> <p>Control: placebo, subcutaneous injections every 6 months (N=3906)</p>                                                                                                                                                                                                                                                                                                                                        |
| <b>Outcomes</b>      | Non-vertebral fractures                                                                                                                                                                                                                                                                                                                                                                                                                                                                                                                    |

## The FREEDOM and STAND studies

Reid 2010

|                      |                                                                                                                                                                                                                                                                                                                                                                                                                                                                                                                                                                                                                                                                                                                                                                                                                                                                                                                                                                                                    |
|----------------------|----------------------------------------------------------------------------------------------------------------------------------------------------------------------------------------------------------------------------------------------------------------------------------------------------------------------------------------------------------------------------------------------------------------------------------------------------------------------------------------------------------------------------------------------------------------------------------------------------------------------------------------------------------------------------------------------------------------------------------------------------------------------------------------------------------------------------------------------------------------------------------------------------------------------------------------------------------------------------------------------------|
| <b>Methods</b>       | <p>Analysis included data from two phase 3 clinical trials:</p> <ul style="list-style-type: none"><li>- FREEDOM: 36-month randomized, double-blind, placebo-controlled phase 3 trial.</li><li>- STAND: Study of Transitioning from AleNdrionate to Denosumab (STAND) was a 12-month randomized, double-blind, double dummy, active-comparator phase 3 trial</li></ul>                                                                                                                                                                                                                                                                                                                                                                                                                                                                                                                                                                                                                              |
| <b>Participants</b>  | <p>Inclusion criteria:</p> <ul style="list-style-type: none"><li>- FREEDOM: Participants were ambulatory postmenopausal women from 60 to 90 years of age with a bone mineral density (BMD) T-score of less than -2.5 at the lumbar spine or total hip and greater than -4.0 at both sites.</li><li>- STAND: Subjects were ambulatory postmenopausal women 55 years of age or older with BMD T-scores of between -2.0 and -4.0 at the lumbar spine or total hip. All participants had 6 months or more of prior alendronate treatment.</li></ul> <p>Excluded criteria: Both studies excluded women who had a disease or condition known to affect bone metabolism, as well as patients with prior intravenous bisphosphonate use.</p> <ul style="list-style-type: none"><li>- FREEDOM: Women were excluded if they had used oral bisphosphonates for more than 3 years or if they had taken oral bisphosphonates for more than 3 months and the last dose was within 1 year of enrollment</li></ul> |
| <b>Interventions</b> | <p>FREEDOM</p> <p>Intervention: denosumab 60 mg administered as a subcutaneous injection every 6 months</p> <p>Control: placebo</p> <p>STAND</p> <p>Intervention: subcutaneous denosumab 60-mg injection every 6 months plus an oral placebo tablet once weekly</p> <p>Control: placebo injection every 6 months plus a weekly oral alendronate tablet</p>                                                                                                                                                                                                                                                                                                                                                                                                                                                                                                                                                                                                                                         |
| <b>Outcomes</b>      | Clinical fractures                                                                                                                                                                                                                                                                                                                                                                                                                                                                                                                                                                                                                                                                                                                                                                                                                                                                                                                                                                                 |

## The HORIZON-PFT (Health Outcomes and Reduced Incidence with Zoledronic Acid Once Yearly (HORIZON) Pivotal Fracture Trial (PFT))

Black 2007

|                      |                                                                                                                                                                                                                                                                                                                                                                                                                                                                                                                                                                                                                                                                                                                                                                                                                                                                                                                                                                                                                                                                                                                                                                                                                                                                                                                                                                                                                                                                                                 |
|----------------------|-------------------------------------------------------------------------------------------------------------------------------------------------------------------------------------------------------------------------------------------------------------------------------------------------------------------------------------------------------------------------------------------------------------------------------------------------------------------------------------------------------------------------------------------------------------------------------------------------------------------------------------------------------------------------------------------------------------------------------------------------------------------------------------------------------------------------------------------------------------------------------------------------------------------------------------------------------------------------------------------------------------------------------------------------------------------------------------------------------------------------------------------------------------------------------------------------------------------------------------------------------------------------------------------------------------------------------------------------------------------------------------------------------------------------------------------------------------------------------------------------|
| <b>Methods</b>       | The Health Outcomes and Reduced Incidence with Zoledronic Acid Once Yearly (HORIZON) Pivotal Fracture Trial.<br>Multicenter, United States and Germany                                                                                                                                                                                                                                                                                                                                                                                                                                                                                                                                                                                                                                                                                                                                                                                                                                                                                                                                                                                                                                                                                                                                                                                                                                                                                                                                          |
| <b>Participants</b>  | N=7765<br>Inclusion criteria: Postmenopausal women between the ages of 65 and 89 years were eligible for inclusion if they had a bone mineral density T score of $-2.5$ or less at the femoral neck, with or without evidence of existing vertebral fracture, or a T score of $-1.5$ or less, with radiologic evidence of at least two mild vertebral fractures or one moderate vertebral fracture. Previous use of oral bisphosphonates was allowed, with the duration of the washout period dependent on previous use (e.g., previous use of $\geq 48$ weeks required 2 years of washout). Concomitant use of the following osteoporosis medications was allowed at baseline and during follow-up: hormone therapy, raloxifene, calcitonin, tibolone, tamoxifen, dehydroepiandrosterone, ipriflavone, and medroxyprogesterone.<br>Exclusion criteria: Ineligibility criteria included any previous use of parathyroid hormone or sodium fluoride, use of anabolic steroids or growth hormone within 6 months before trial entry or oral or intravenous systemic corticosteroids within 12 months, and any previous use of strontium. Patients with a serum calcium level of more than 2.75 mmol per liter or less than 2.00 mmol per liter were ineligible, as were patients with a calculated creatinine clearance of less than 30.0 ml per minute at either of two baseline visits or urine dipstick results of more than 2+ for protein, without evidence of contamination or bacteriuria. |
| <b>Interventions</b> | Patients were followed until 36 months<br>Intervention: zoledronic acid 5 mg, 15 minute intravenous administration at baseline (day 0), at 12 months, and at 24 months (N=3875)<br>Control: placebo, 15 minute intravenous administration at baseline (day 0), at 12 months, and at 24 months (N=3861)                                                                                                                                                                                                                                                                                                                                                                                                                                                                                                                                                                                                                                                                                                                                                                                                                                                                                                                                                                                                                                                                                                                                                                                          |
| <b>Outcomes</b>      | Clinical, vertebral, non-vertebral and hip fractures                                                                                                                                                                                                                                                                                                                                                                                                                                                                                                                                                                                                                                                                                                                                                                                                                                                                                                                                                                                                                                                                                                                                                                                                                                                                                                                                                                                                                                            |

Black 2021

|                     |                                                                                                                                                                                                                                                                                                                                                                                                                                                                                                                                  |
|---------------------|----------------------------------------------------------------------------------------------------------------------------------------------------------------------------------------------------------------------------------------------------------------------------------------------------------------------------------------------------------------------------------------------------------------------------------------------------------------------------------------------------------------------------------|
| <b>Methods</b>      | 3-year international, randomized, double-blind, placebo-controlled phase 3 study, Health Outcomes and Reduced Incidence with Zoledronic Acid Once Yearly-Pivotal Fracture Trial (HORIZON-PFT).<br>Multicenter, United States and Germany                                                                                                                                                                                                                                                                                         |
| <b>Participants</b> | N=7765<br>Inclusion criteria: postmenopausal women age 65 to 89 years were eligible if the following criteria were met; BMD T-score at the femoral neck $\leq -2.5$ or T-score $\leq -1.5$ with at least two mild vertebral fractures or one moderate vertebral fracture. Previous use of oral bisphosphonates was allowed, with the duration of the washout period dependent on previous bisphosphonate use. The following concomitant osteoporosis medications were allowed at baseline and during follow-up: hormone therapy, |

|                      |                                                                                                                                                                                                                                                                                                                                                                                                                                                                          |
|----------------------|--------------------------------------------------------------------------------------------------------------------------------------------------------------------------------------------------------------------------------------------------------------------------------------------------------------------------------------------------------------------------------------------------------------------------------------------------------------------------|
|                      | raloxifene, calcitonin, tibolone, tamoxifen, dehydroepiandrosterone, ipriflavone, and medroxy-progesterone.<br>Exclusion criteria: Participants were ineligible if any of the following criteria were met: any previous use of parathyroid hormone, strontium, or sodium fluoride; use of anabolic steroids or growth hormone within 6 months before study entry; intravenous systemic corticosteroids within 12 months; or a calculated creatinine clearance <30 mL/min |
| <b>Interventions</b> | Patients were monitored for 3 years.<br>Intervention: ZOL 5 mg, 15 minutes intravenous administration at baseline (day 0), at 12 months, and at 24 months (N=3862)<br>Control: placebo infusion at baseline (day 0), at 12 months, and at 24 months (N=3852)<br>All participants received oral daily calcium (1000 to 1500 mg) and vitamin D (400 to 1200 IU).                                                                                                           |
| <b>Outcomes</b>      | Vertebral, non-vertebral and hip fractures                                                                                                                                                                                                                                                                                                                                                                                                                               |

#### Cauley 2011

|                      |                                                                                                                                                                                                                                                                                                                                                                                                                                                                                                                                                          |
|----------------------|----------------------------------------------------------------------------------------------------------------------------------------------------------------------------------------------------------------------------------------------------------------------------------------------------------------------------------------------------------------------------------------------------------------------------------------------------------------------------------------------------------------------------------------------------------|
| <b>Methods</b>       | The HORIZON-PFT: 3 year RCT<br>240 clinical centers in 27 countries                                                                                                                                                                                                                                                                                                                                                                                                                                                                                      |
| <b>Participants</b>  | 7736 women with established osteoporosis, 79% of the women were white<br>Inclusion criteria: All women in the HORIZON trial were between the ages of 65 and 89 years, postmenopausal, and had a femoral neck bone mineral density (BMD) T-score of -2.5 or less with or without evidence of existing vertebral fractures or a T-score of -1.5 or less with radiologic evidence of at least two mild or one moderate vertebral fracture. Prior bisphosphonate use was allowed, with the duration of washout period depending on duration of previous use. |
| <b>Interventions</b> | Intervention: Zoledronic acid 5 mg, 15-minute intravenous administration at baseline, 12 months and 24 months (N=3875)<br>Control: placebo, 15-minute intravenous administration at baseline, 12 months and 24 months (N=3861)                                                                                                                                                                                                                                                                                                                           |
| <b>Outcomes</b>      | Clinical fractures                                                                                                                                                                                                                                                                                                                                                                                                                                                                                                                                       |

#### Eastell 2009

|                      |                                                                                                                                                                                                                                                                                                                                                                                                                                                            |
|----------------------|------------------------------------------------------------------------------------------------------------------------------------------------------------------------------------------------------------------------------------------------------------------------------------------------------------------------------------------------------------------------------------------------------------------------------------------------------------|
| <b>Methods</b>       | Subgroup analysis using data from HORIZON-PFT: a 36 month RCT, parallel group                                                                                                                                                                                                                                                                                                                                                                              |
| <b>Participants</b>  | Inclusion criteria: Postmenopausal women aged 65– 89 yr were eligible for inclusion if they had a femoral neck T-score $\leq$ -2.5 with or without evidence of an existing vertebral fracture, or a T-score $\leq$ -1.5 with radiological evidence of at least two mild or one moderate vertebral fracture(s). Prior oral bisphosphonate use was allowed, with washout duration dependent on previous use (e.g. > 48 wk of usage required a 2-yr washout). |
| <b>Interventions</b> | Intervention: zoledronic acid 5 mg, single infusion at baseline, 12 and 24 months (N=3875)<br>Control: placebo, single infusion at baseline, 12 and 24 months (N=3861)                                                                                                                                                                                                                                                                                     |
| <b>Outcomes</b>      | Vertebral, non-vertebral and hip fractures                                                                                                                                                                                                                                                                                                                                                                                                                 |

## Jacques 2012

|                      |                                                                                                                                                                                                                                                                                                                                                                                                                                           |
|----------------------|-------------------------------------------------------------------------------------------------------------------------------------------------------------------------------------------------------------------------------------------------------------------------------------------------------------------------------------------------------------------------------------------------------------------------------------------|
| <b>Methods</b>       | Data from HORIZON-PFT: a prospective, randomized, double-blind, placebo-controlled multinational trial                                                                                                                                                                                                                                                                                                                                    |
| <b>Participants</b>  | N=7736<br>Inclusion criteria: postmenopausal women that had a femoral neck BMD T-score of -2.5 or less, with or without existing vertebral fracture, or a T-score of -1.5 or less, with radiological evidence of at least two mild vertebral fractures or one moderate vertebral fracture. Prior oral bisphosphonate use was allowed, with washout duration dependent on previous use (eg, >48 weeks of usage required a 2-year washout). |
| <b>Interventions</b> | Intervention: zoledronic acid, intravenous administration at baseline, 12 and 24 months (N=3875)<br>Control: placebo, intravenous administration at baseline, 12 and 24 months (N=3861)                                                                                                                                                                                                                                                   |
| <b>Outcomes</b>      | Vertebral and non-vertebral fractures                                                                                                                                                                                                                                                                                                                                                                                                     |

## Popp 2014

|                      |                                                                                                                                                                                                                                                                                                                                                                                                                                                                                                                                                                                                                                                                 |
|----------------------|-----------------------------------------------------------------------------------------------------------------------------------------------------------------------------------------------------------------------------------------------------------------------------------------------------------------------------------------------------------------------------------------------------------------------------------------------------------------------------------------------------------------------------------------------------------------------------------------------------------------------------------------------------------------|
| <b>Methods</b>       | Sub study of HORIZON; follow-up: 3 years                                                                                                                                                                                                                                                                                                                                                                                                                                                                                                                                                                                                                        |
| <b>Participants</b>  | 110 women were included in this analysis, mean age 77 years<br>96 women completed the study over 36 months<br>Inclusion criteria:<br>- HORIZON Trial - Postmenopausal women between the ages of 65 and 89 years with osteoporosis, defined as a BMD T-score $\leq -2.5$ at the FN with or without prevalent vertebral fracture or $\leq -1.5$ in the presence of at least two mild or one moderate vertebral fracture.<br>- Sub study of HORIZON – In addition to the HORIZON Trial inclusion criteria, women had to have received at least one dose of study drug, had attended at least one follow-up visit, and did not experience weight loss $\geq 10\%$ . |
| <b>Interventions</b> | Intervention: 15-minute intravenous administration of ZOL 5 mg at baseline, 12 and 24 months (N=55)<br>Control: placebo at baseline, 12 and 24 months (N=55)                                                                                                                                                                                                                                                                                                                                                                                                                                                                                                    |
| <b>Outcomes</b>      | Clinical, vertebral and non-vertebral fractures                                                                                                                                                                                                                                                                                                                                                                                                                                                                                                                                                                                                                 |

## Liberman

### Meunier 1997

|                     |                                                                                                                                                                                                                                                                                                                                                                                                                                                                                                                       |
|---------------------|-----------------------------------------------------------------------------------------------------------------------------------------------------------------------------------------------------------------------------------------------------------------------------------------------------------------------------------------------------------------------------------------------------------------------------------------------------------------------------------------------------------------------|
| <b>Methods</b>      | RCT, parallel group, pooled data<br>18 sites in the USA and 19 sites in Australia, Canada, Europe, Israel, Mexico, New Zealand and South America                                                                                                                                                                                                                                                                                                                                                                      |
| <b>Participants</b> | Inclusion criteria: Postmenopausal women between 45 and 80 yr of age (mean 63) with osteoporosis, defined as lumbar spine BMD at least 2.5 SD below the young adult mean, without the requisite of an existing fracture, were eligible for participation.<br>Exclusion criteria: women with other causes of osteoporosis (e.g., treatment with glucocorticoids) or other disorders of bone and mineral metabolism (e.g., vitamin D deficiency, Paget's disease, or hyperparathyroidism); active peptic ulcer disease, |



|                      |                                                                                                                                                                                                                                                                                                                                                                                                                                                      |
|----------------------|------------------------------------------------------------------------------------------------------------------------------------------------------------------------------------------------------------------------------------------------------------------------------------------------------------------------------------------------------------------------------------------------------------------------------------------------------|
|                      | abnormal renal function (serum creatinine level, >1.5 mg per deciliter [130 mmol per liter]), or abnormal hepatic function; abnormalities of the lumbar spine precluding the assessment of bone mineral density at a minimum of three lumbar vertebrae or a history of hip fracture; or any prior treatment with bisphosphonates or treatment within the preceding 12 months with estrogen, progestin, calcitonin, fluoride, or an anabolic steroid. |
| <b>Interventions</b> | Intervention: alendronate - 5 mg/day or 10 mg/day for 3 years; or 20 mg/day for 2 years followed by 5mg/day for the third year. (N=526)<br>Control: placebo for 3 years (N=355)                                                                                                                                                                                                                                                                      |
| <b>Outcomes</b>      | Vertebral and non-vertebral fractures                                                                                                                                                                                                                                                                                                                                                                                                                |

#### Tucci 1996

|                      |                                                                                                                                                                                                                                                                                                                                                                                                                                                                                                                                                                                                                                                                                                                                                                                                                                                                                                                                                                                                                                                                                                                                                                                                                                                                                                                                                                                                                                                                                                                                                                                                                                                                              |
|----------------------|------------------------------------------------------------------------------------------------------------------------------------------------------------------------------------------------------------------------------------------------------------------------------------------------------------------------------------------------------------------------------------------------------------------------------------------------------------------------------------------------------------------------------------------------------------------------------------------------------------------------------------------------------------------------------------------------------------------------------------------------------------------------------------------------------------------------------------------------------------------------------------------------------------------------------------------------------------------------------------------------------------------------------------------------------------------------------------------------------------------------------------------------------------------------------------------------------------------------------------------------------------------------------------------------------------------------------------------------------------------------------------------------------------------------------------------------------------------------------------------------------------------------------------------------------------------------------------------------------------------------------------------------------------------------------|
| <b>Methods</b>       | RCT, parallel group<br>18 centers in the USA                                                                                                                                                                                                                                                                                                                                                                                                                                                                                                                                                                                                                                                                                                                                                                                                                                                                                                                                                                                                                                                                                                                                                                                                                                                                                                                                                                                                                                                                                                                                                                                                                                 |
| <b>Participants</b>  | 478 women were enrolled in the study. 91% were Caucasian and 8% Asian<br>Inclusion criteria: subjects were women 45 to 82 years of age who were postmenopausal for at least 5 years and who had osteoporosis as defined by a low lumbar spine bone mineral density (BMD) (less than 0.92 g/cm <sup>2</sup> by Lunar DPX or less than 0.80 g/cm <sup>2</sup> by Hologic QDR or Norland XI-26). Pre-existing vertebral fracture was not a requirement for eligibility. These subjects were otherwise in good health based on their medical history, physical examination, and laboratory screening evaluation, and were no more than 15% below or 30% above ideal body weight. Their spinal anatomy was suitable for dual-energy x-ray absorptiometry (DXA) of the lumbar spine, with at least three evaluable vertebrae from L1-L4.<br>Exclusion criteria: Criteria for exclusion included: 1) metabolic disease known to alter skeletal or mineral metabolism, 2) cancer, history of any illness, or significant end-organ disease that might confound the results of the study or pose additional risk to the subject, 3) history of an osteoporotic fracture of the proximal femur, 4) active upper gastrointestinal disease, 5) significantly impaired renal function (serum creatinine >1.5 mg/dL), 6) use of medications known to alter skeletal or mineral metabolism, 7) daily use of medications which have appreciable potential for gastrointestinal irritation, and 8) use of any illicit drug, smoking of more than 20 cigarettes per day, habitual ingestion of greater than six cups of coffee per day, or more than two alcohol containing beverages per day. |
| <b>Interventions</b> | Intervention 1: alendronate 5 mg/day for 3 years(N=98)<br>Intervention 2: alendronate 10 mg/day for 3 years (N=94)<br>Intervention 3: alendronate 20 mg/day for 2 years, switched to 5mg/day for the 3 <sup>rd</sup> year (N=94)<br>Control: placebo, daily for 3 years (N=192)                                                                                                                                                                                                                                                                                                                                                                                                                                                                                                                                                                                                                                                                                                                                                                                                                                                                                                                                                                                                                                                                                                                                                                                                                                                                                                                                                                                              |
| <b>Outcomes</b>      | Non-vertebral fractures                                                                                                                                                                                                                                                                                                                                                                                                                                                                                                                                                                                                                                                                                                                                                                                                                                                                                                                                                                                                                                                                                                                                                                                                                                                                                                                                                                                                                                                                                                                                                                                                                                                      |

## The MORE (Multiple Outcomes of Raloxifene Evaluation) study

### Agnusdei 2000

|                      |                                                                                                                                                                                                                                                                                                                                                                                                                                                                                                                                                                                                                                                                                                    |
|----------------------|----------------------------------------------------------------------------------------------------------------------------------------------------------------------------------------------------------------------------------------------------------------------------------------------------------------------------------------------------------------------------------------------------------------------------------------------------------------------------------------------------------------------------------------------------------------------------------------------------------------------------------------------------------------------------------------------------|
| <b>Methods</b>       | The MORE trial: 36 month, placebo-controlled, double-blind randomized trial.<br>180 centers in 25 countries.                                                                                                                                                                                                                                                                                                                                                                                                                                                                                                                                                                                       |
| <b>Participants</b>  | Baseline and follow-up radiographs were available for 6828 women (89%)<br>Inclusion criteria: women aged 31 to 80 years (a mean age of 67 years), who were at least 2 years postmenopausal and had no severe or chronically disabling conditions but who had osteoporosis, defined by low BMD or X ray evidence of vertebral fractures.<br>Women were divided in 2 groups:<br>- Study I: those whose femoral neck or lumbar spine BMD was more than 2.5 standard deviations below peak bone density,<br>- Study II: and those with $\geq 1$ moderate or $\geq 2$ mild vertebral fractures in the presence of low BMD (as specified for Study I) or $\geq 2$ moderate fractures, regardless of BMD. |
| <b>Interventions</b> | Study I<br>Intervention: Raloxifene 60 mg or 120 mg per day (N= 2959)<br>Control: placebo (N=1506)<br>Study II<br>Intervention: Raloxifene 60 mg or 120 mg per day (N= 1513)<br>Control: placebo (N=757)                                                                                                                                                                                                                                                                                                                                                                                                                                                                                           |
| <b>Outcomes</b>      | Vertebral and non-vertebral fractures. Vertebral fractures stratified by previous fracture history.                                                                                                                                                                                                                                                                                                                                                                                                                                                                                                                                                                                                |

### Barrett-Connor 2004

|                      |                                                                                                                                                                                                                                                                                                                                                                                                                                                        |
|----------------------|--------------------------------------------------------------------------------------------------------------------------------------------------------------------------------------------------------------------------------------------------------------------------------------------------------------------------------------------------------------------------------------------------------------------------------------------------------|
| <b>Methods</b>       | The MORE study consisted of a 3-year core treatment phase (a randomized, double-blind, placebo-controlled trial) followed by a 1-year extension phase for 4 years of total follow-up. During the 4 <sup>th</sup> year women were allowed to take other bone-active agents, except oral estrogen or estrogen-progestin therapy.<br>Posthoc analysis of the MORE trial based on data reported through 4 years of follow-up.<br>180 sites in 25 countries |
| <b>Participants</b>  | N=7705, primarily white (96%).<br>Inclusion criteria: Participants were at least 2 years postmenopausal and had osteoporosis defined by a BMD T score of 2.5 SD or less at the lumbar spine or femoral neck or radiographically apparent fractures                                                                                                                                                                                                     |
| <b>Interventions</b> | Intervention 1: Raloxifene 60 mg or 120 mg per day (N=5129)<br>Control: placebo (N=2576)                                                                                                                                                                                                                                                                                                                                                               |
| <b>Outcomes</b>      | Hip fractures                                                                                                                                                                                                                                                                                                                                                                                                                                          |

## Bjarnason 2001

|                      |                                                                                                                                                                                                                                                                                                                                                                                                                                                                                                                                                                                         |
|----------------------|-----------------------------------------------------------------------------------------------------------------------------------------------------------------------------------------------------------------------------------------------------------------------------------------------------------------------------------------------------------------------------------------------------------------------------------------------------------------------------------------------------------------------------------------------------------------------------------------|
| <b>Methods</b>       | The MORE trial<br>180 centers in 25 countries                                                                                                                                                                                                                                                                                                                                                                                                                                                                                                                                           |
| <b>Participants</b>  | Analysis based on 3-year follow-up data from 2722 women.<br>The study was stratified for radiologically significant prevalent vertebral fractures such that one third of the women had prevalent vertebral fractures (sub study II) and two-thirds of the women had no significant deformities (sub study I).<br>Inclusion criteria: postmenopausal women with a bone mineral density T-score of the spine or femoral neck below -2.5.<br>Exclusion criteria: women diagnosed with an estrogen-sensitive cancer or had other diseases or treatments known to influence bone metabolism. |
| <b>Interventions</b> | Intervention: Raloxifene 60 mg or 120 mg per day (N=overall not stated)<br>Control: placebo (N=overall not stated)                                                                                                                                                                                                                                                                                                                                                                                                                                                                      |
| <b>Outcomes</b>      | Vertebral fractures                                                                                                                                                                                                                                                                                                                                                                                                                                                                                                                                                                     |

## Delmas 2003

|                      |                                                                                                                                                                                                                                                                                                                                                                                                                                                                                                                                                                                                                                                                                                                                                                                                                                                                                                                                                                                                                                                                                                                                                                                                                                                                                                                                                                                                                                                                                                                                                              |
|----------------------|--------------------------------------------------------------------------------------------------------------------------------------------------------------------------------------------------------------------------------------------------------------------------------------------------------------------------------------------------------------------------------------------------------------------------------------------------------------------------------------------------------------------------------------------------------------------------------------------------------------------------------------------------------------------------------------------------------------------------------------------------------------------------------------------------------------------------------------------------------------------------------------------------------------------------------------------------------------------------------------------------------------------------------------------------------------------------------------------------------------------------------------------------------------------------------------------------------------------------------------------------------------------------------------------------------------------------------------------------------------------------------------------------------------------------------------------------------------------------------------------------------------------------------------------------------------|
| <b>Methods</b>       | MORE: RCT, parallel group<br>25 countries (including United States and Canada)                                                                                                                                                                                                                                                                                                                                                                                                                                                                                                                                                                                                                                                                                                                                                                                                                                                                                                                                                                                                                                                                                                                                                                                                                                                                                                                                                                                                                                                                               |
| <b>Participants</b>  | N=7705<br>Inclusion criteria: Women who were at least 2 years postmenopausal and had no severe or long-term disabling conditions, but who had osteoporosis, defined as low bone mineral density or radiographically apparent vertebral fractures.<br>Exclusion criteria: Women were excluded if they had experienced bone disease other than osteoporosis, substantial postmenopausal symptoms or abnormal uterine bleeding, endometrial carcinoma, a history of or suspected breast carcinoma at any time, or a history of non-skin cancer in the previous 5y; taken an androgen, calcitonin or BP within the previous 6 mo; been taking oral estrogen within the previous 2 mo;; been receiving fluoride therapy for more than 3 mo during the previous 2y.; undergone systematic glucocorticoid therapy for more than 1 mo within the past year; taken antiseizure drugs or pharmacologic doses of cholecalciferol; had a history of thromboembolic disorders within the last 10y (except in association with an injury; experienced endocrine disorders requiring therapy (except for type 2 diabetes or hypothyroidism)); had serum creatinine levels above 225 nmol/L (2.5 mg/dL); had active renal lithiasis, abnormal hepatic function, or untreated malabsorption; or consumed more than 4 alcoholic drinks per day. In addition, we excluded women with pathologic fractures, those from whom satisfactory thoracic and lumbar radiographs could not be obtained, and those with fewer than 2 lumbar and 4 thoracic vertebrae that were evaluable. |
| <b>Interventions</b> | Treatment duration: 3 years<br>Intervention: raloxifene 60 mg/day (N=2557)<br>Intervention: raloxifene 120 mg/day (N=2572)<br>Control: placebo, daily (N=2576)                                                                                                                                                                                                                                                                                                                                                                                                                                                                                                                                                                                                                                                                                                                                                                                                                                                                                                                                                                                                                                                                                                                                                                                                                                                                                                                                                                                               |
| <b>Outcomes</b>      | Vertebral and non-vertebral fractures                                                                                                                                                                                                                                                                                                                                                                                                                                                                                                                                                                                                                                                                                                                                                                                                                                                                                                                                                                                                                                                                                                                                                                                                                                                                                                                                                                                                                                                                                                                        |

## Ettinger 1999

|                      |                                                                                                                                                                                                                                                                                                                                                                                                                                                                                                                                                                                                                                                                                                                                                                                                                                                                                                                                                                                                                                                                                                                                                                                                                                                                                                                                                                                                                                                                                                                                                                                                                                                   |
|----------------------|---------------------------------------------------------------------------------------------------------------------------------------------------------------------------------------------------------------------------------------------------------------------------------------------------------------------------------------------------------------------------------------------------------------------------------------------------------------------------------------------------------------------------------------------------------------------------------------------------------------------------------------------------------------------------------------------------------------------------------------------------------------------------------------------------------------------------------------------------------------------------------------------------------------------------------------------------------------------------------------------------------------------------------------------------------------------------------------------------------------------------------------------------------------------------------------------------------------------------------------------------------------------------------------------------------------------------------------------------------------------------------------------------------------------------------------------------------------------------------------------------------------------------------------------------------------------------------------------------------------------------------------------------|
| <b>Methods</b>       | RCT, parallel group<br>180 centers in 25 countries (Approximately half the study subjects were recruited by a centralized campaign in the United States and Canada that used both print and radio advertisements.)                                                                                                                                                                                                                                                                                                                                                                                                                                                                                                                                                                                                                                                                                                                                                                                                                                                                                                                                                                                                                                                                                                                                                                                                                                                                                                                                                                                                                                |
| <b>Participants</b>  | 7705 women were enrolled in the study; 95.7% were white<br>Inclusion criteria: women who were at least 2 years postmenopausal and had no severe or long-term disabling conditions but who had osteoporosis, defined as low bone mineral density or radiographically apparent vertebral fractures.<br>Exclusion criteria: Women were excluded if they had experienced bone disease other than osteoporosis, substantial postmenopausal symptoms or abnormal uterine bleeding, endometrial carcinoma, a history of /or suspected breast carcinoma at anytime, or a history of non skin cancer in the previous 5 years; taken an androgen, calcitonin, or bisphosphonate within the previous 6 months; been taking oral estrogen within the previous 2 months; been receiving fluoride therapy for more than 3 months during the previous 2years; undergone systemic glucocorticoid therapy for more than 1 month within the past year; taken anti seizure drugs or pharmacologic doses of cholecalciferol; had a history of thromboembolic disorders within the last 10 years(except in association with an injury; experienced endocrine disorders requiring therapy (except for type 2 diabetes or hypothyroidism); had serum creatinine levels above 225 µmol/L (2.5 mg/dL); had active renal lithiasis, abnormal hepatic function, or untreated malabsorption; or consumed more than 4 alcoholic drinks per day. In addition, we excluded women with pathologic fractures, those from whom satisfactory thoracic and lumbar radiographs could not be obtained, and those with fewer than 2 lumbar and 4 thoracic vertebrae that were evaluable. |
| <b>Interventions</b> | (Intervention 1 and 2: N=4536)<br>Intervention 1: raloxifene 60 mg per day<br>Intervention 2: raloxifene 120 mg per day<br>Control: placebo (N=2292)                                                                                                                                                                                                                                                                                                                                                                                                                                                                                                                                                                                                                                                                                                                                                                                                                                                                                                                                                                                                                                                                                                                                                                                                                                                                                                                                                                                                                                                                                              |
| <b>Outcomes</b>      | Vertebral, non-vertebral and hip fractures                                                                                                                                                                                                                                                                                                                                                                                                                                                                                                                                                                                                                                                                                                                                                                                                                                                                                                                                                                                                                                                                                                                                                                                                                                                                                                                                                                                                                                                                                                                                                                                                        |

## Johnell 2004

|                     |                                                                                                                                                                                                                                                                                                                                                                                                                                                                                                                                                                                                                                                                                                                                                                                                                                                                                                                                |
|---------------------|--------------------------------------------------------------------------------------------------------------------------------------------------------------------------------------------------------------------------------------------------------------------------------------------------------------------------------------------------------------------------------------------------------------------------------------------------------------------------------------------------------------------------------------------------------------------------------------------------------------------------------------------------------------------------------------------------------------------------------------------------------------------------------------------------------------------------------------------------------------------------------------------------------------------------------|
| <b>Methods</b>      | MORE: a RCT, parallel group<br>Multicenter in 25 countries (United States, Scandinavia, other parts of Europe, and other (Latin America and Asia)). Approximately half of the study subjects were recruited by a centralized campaign in the United States and Canada that used both print and radio advertisements                                                                                                                                                                                                                                                                                                                                                                                                                                                                                                                                                                                                            |
| <b>Participants</b> | Inclusion criteria: women who were at least 2 years postmenopausal and had osteoporosis, defined as low BMD or a radiographically apparent vertebral fracture.<br>Exclusion criteria: women were excluded if they had experienced bone disease other than osteoporosis, substantial postmenopausal symptoms or abnormal uterine bleeding, endometrial carcinoma, a history of or suspected breast carcinoma at any time, or a history of non-skin cancer in the previous 5 years; taken an androgen, calcitonin or BP within the previous 6 months; been taking oral estrogen within the previous 2 months; been receiving fluoride therapy for more than 3 months during the previous 2 years.; undergone systematic glucocorticoid therapy for more than 1 month within the past year; taken antiseizure drugs or pharmacologic doses of cholecalciferol; had a history of thromboembolic disorders within the last 10 years |

(except in association with an injury; experienced endocrine disorders requiring therapy (except for type 2 diabetes or hypothyroidism)); had serum creatinine levels above 225  $\mu\text{mol/L}$  (2.5 mg/dL); had active renal lithiasis, abnormal hepatic function, or untreated malabsorption; or consumed more than 4 alcoholic drinks per day. In addition, we excluded women with pathologic fractures, those from whom satisfactory thoracic and lumbar radiographs could not be obtained, and those with fewer than 2 lumbar and 4 thoracic vertebrae that were evaluable.

**Interventions** Treatment duration: 3 years  
 Intervention: raloxifene 60 mg or 120 mg per day (N=4536)  
 Control: placebo, daily (N=2292)

**Outcomes** Vertebral fractures

### Kanis 2003

**Methods** The MORE trial

**Participants** N=3204 - subgroup of patients from the MORE study  
 Inclusion criteria: women who were at least 2 years postmenopausal and had osteoporosis, defined by a T-score of 2.5 SD or less at the lumbar spine (L1–L4) or femoral neck based on the Hologic reference data or radiographically apparent fractures.

**Interventions** Treatment duration: 36 months  
 Intervention: raloxifene 60 mg/day (N=1577)  
 Control: placebo, daily (N=1627)

**Outcomes** Vertebral fractures, analysis stratified on LS T-score

### Kanis 2010

**Methods** MORE: a RCT, parallel group  
 Data from the 2 sub-studies was combined  
 Up to 36 months of follow-up for efficacy and non-serious adverse events and up to 40 months of follow-up for serious adverse events  
 Multicenter in 25 countries

**Participants** 7705 women were recruited in MORE  
 Inclusion criteria: women aged 31 to 80 years in 25 countries who had been postmenopausal for at least 2 years and who met World Health Organization criteria for having osteoporosis. Study group 1 included those in whom femoral neck or lumbar spine bone mineral density T-score was below  $-2.5$  SD. Study group 2 included women who had low bone mineral density and one or more moderate or severe vertebral fractures, or two or more mild vertebral fractures, or who had at least two moderate fractures regardless of their bone mineral density.  
 Exclusion criteria: Women were excluded if they had bone disease other than osteoporosis, had taken systemic glucocorticoid therapy for more than 1 month within the previous year or consumed more than 4 alcoholic drinks daily.

**Interventions** Intervention 1: raloxifene 60 mg/day  
 Intervention 2: raloxifene 120 mg/day  
 Control: placebo, daily

|                 |                                                 |
|-----------------|-------------------------------------------------|
| <b>Outcomes</b> | Clinical, vertebral and non-vertebral fractures |
|-----------------|-------------------------------------------------|

#### Maricic 2002

|                      |                                                                                                                                                                                                            |
|----------------------|------------------------------------------------------------------------------------------------------------------------------------------------------------------------------------------------------------|
| <b>Methods</b>       | The MORE Trial: randomized, placebo-controlled, double-blind                                                                                                                                               |
| <b>Participants</b>  | The MORE Trial enrolled 7705 postmenopausal women with osteoporosis, defined by a lumbar spine or femoral neck BMD T score at or below 2.5 and/or radiographically apparent prevalent vertebral fractures. |
| <b>Interventions</b> | 3 year treatment<br>Intervention 1: raloxifene hydrochloride 60 mg/d (N=2572)<br>Intervention 2: raloxifene hydrochloride 120 mg/d (N=2557)<br>Control: placebo (N=2576)                                   |
| <b>Outcomes</b>      | Vertebral fractures                                                                                                                                                                                        |

#### Qu 2005

|                      |                                                                                                                                                                                                                                                                                                                                                 |
|----------------------|-------------------------------------------------------------------------------------------------------------------------------------------------------------------------------------------------------------------------------------------------------------------------------------------------------------------------------------------------|
| <b>Methods</b>       | The MORE trial: a double-blind, randomized, placebo-controlled, 4-year trial<br>180 study centers                                                                                                                                                                                                                                               |
| <b>Participants</b>  | N=6828<br>Inclusion criteria: postmenopausal women with osteoporosis (defined by a lumbar spine or femoral neck bone mineral density (BMD) T-score $\leq -2.5$ using the manufacturers' reference databases, and/or radiographically apparent prevalent vertebral fractures) in MORE, who had a baseline and at least one follow-up radiograph. |
| <b>Interventions</b> | Intervention 1: raloxifene 60 mg/day (N=2259)<br>Intervention 2: raloxifene 120 mg/day (N=2277)<br>Control: placebo (N=2292)                                                                                                                                                                                                                    |
| <b>Outcomes</b>      | Vertebral fractures                                                                                                                                                                                                                                                                                                                             |

#### Sarkar 2002

|                      |                                                                                                                                                                                                                                                                                                                                                                                                                                                                                                                                                      |
|----------------------|------------------------------------------------------------------------------------------------------------------------------------------------------------------------------------------------------------------------------------------------------------------------------------------------------------------------------------------------------------------------------------------------------------------------------------------------------------------------------------------------------------------------------------------------------|
| <b>Methods</b>       | MORE trial, a 3-year RCT                                                                                                                                                                                                                                                                                                                                                                                                                                                                                                                             |
| <b>Participants</b>  | 7705 women enrolled in the MORE trial, from which 6828 of them had at least 1 post-baseline BMD determination.<br>Inclusion criteria: women at least 2 years postmenopausal<br>Exclusion criteria: women that had bone disease other than osteoporosis, substantial postmenopausal symptoms, abnormal uterine bleeding, or endometrial carcinoma; women who had pathological fractures, women for whom satisfactory thoracic and lumbar spine radiographs could not be obtained, and women with fewer than two lumbar vertebrae that were evaluable. |
| <b>Interventions</b> | Intervention: raloxifene 60 mg/day or 120 mg/day (N=4536)<br>Control: placebo, daily (N=2292)                                                                                                                                                                                                                                                                                                                                                                                                                                                        |
| <b>Outcomes</b>      | Vertebral fractures                                                                                                                                                                                                                                                                                                                                                                                                                                                                                                                                  |

## Sarkar 2004

|                      |                                                                                                                                                                                                                                                                                                                                                                                                                                                                                                                                                                                                                                                                                                                                                                                                                                                                                                                                                                                                                                                                                                                       |
|----------------------|-----------------------------------------------------------------------------------------------------------------------------------------------------------------------------------------------------------------------------------------------------------------------------------------------------------------------------------------------------------------------------------------------------------------------------------------------------------------------------------------------------------------------------------------------------------------------------------------------------------------------------------------------------------------------------------------------------------------------------------------------------------------------------------------------------------------------------------------------------------------------------------------------------------------------------------------------------------------------------------------------------------------------------------------------------------------------------------------------------------------------|
| <b>Methods</b>       | MORE trial, a 3-year RCT<br>Data from a subgroup of women enrolled in the MORE trial; 17 centers in 5 countries (North America, South America and Europe)                                                                                                                                                                                                                                                                                                                                                                                                                                                                                                                                                                                                                                                                                                                                                                                                                                                                                                                                                             |
| <b>Participants</b>  | N=2503 women<br>Inclusion criteria:<br>- MORE Trial: postmenopausal women with osteoporosis with either BMD at least 2.5 SD below the young adult mean or at least two radiographically apparent vertebral fractures women,<br>- Specific of this study: women had paired (baseline and endpoint) measurements of FN BMD, serum osteocalcin (OC), and bone-specific alkaline phosphatase (ALP).<br>Exclusion criteria: women that had experienced a bone metabolic disease other than osteoporosis; had a history of or suspected breast cancer; had abnormal postmenopausal uterine bleeding or endometrial cancer; had a diagnosis of cancer other than skin cancer in the previous 5 years; used an androgen, calcitonin, or bisphosphonate within the previous 6 months; taken an oral estrogen within the last 2 months; had experienced a thromboembolic event within the last 10 years; received treatment for an endocrine disorder (other than type 2 diabetes or hypothyroidism); had renal lithiasis, abnormal hepatic function, or malabsorption; or consumed greater than four alcoholic drinks per day. |
| <b>Interventions</b> | Intervention: raloxifene 60 mg/day or 120 mg/day (N=1650)<br>Control: placebo, daily (N=853)                                                                                                                                                                                                                                                                                                                                                                                                                                                                                                                                                                                                                                                                                                                                                                                                                                                                                                                                                                                                                          |
| <b>Outcomes</b>      | Vertebral fractures                                                                                                                                                                                                                                                                                                                                                                                                                                                                                                                                                                                                                                                                                                                                                                                                                                                                                                                                                                                                                                                                                                   |

## Siris 2002

|                      |                                                                                                                                                                                                                                                                                           |
|----------------------|-------------------------------------------------------------------------------------------------------------------------------------------------------------------------------------------------------------------------------------------------------------------------------------------|
| <b>Methods</b>       | MORE trial                                                                                                                                                                                                                                                                                |
| <b>Participants</b>  | 7705 women were enrolled in the MORE trial<br>Inclusion criteria: women with osteoporosis, as defined by low bone mineral density (femoral neck or lumbar spine BMD T-score $\leq -2.5$ ) and/or radiographically apparent vertebral fractures, who were at least 2 years postmenopausal. |
| <b>Interventions</b> | Treatment duration: 3 years<br>Intervention 1: raloxifene 60 mg/day (N=2259)<br>Intervention 2: raloxifene 120 mg/day (N=2277)<br>Control: placebo, daily (N=2292)                                                                                                                        |
| <b>Outcomes</b>      | Vertebral fractures, analysis stratified by previous fracture history                                                                                                                                                                                                                     |

## Sontag 2010

|                     |                                                                                                                                                                                                                                                                     |
|---------------------|---------------------------------------------------------------------------------------------------------------------------------------------------------------------------------------------------------------------------------------------------------------------|
| <b>Methods</b>      | The MORE trial, duration of 4 years:<br>- a 3-year core treatment phase and<br>- a 1-year extension phase (during which women were permitted to take other bone-active agents, except for oral estrogen or estrogen-progestin therapy)<br>180 sites in 25 countries |
| <b>Participants</b> | N=5114, primarily white (96%)                                                                                                                                                                                                                                       |

|                      |                                                                                                                                                                                                                                                                                                                                                                                                                                                                                                                                                                                                              |
|----------------------|--------------------------------------------------------------------------------------------------------------------------------------------------------------------------------------------------------------------------------------------------------------------------------------------------------------------------------------------------------------------------------------------------------------------------------------------------------------------------------------------------------------------------------------------------------------------------------------------------------------|
|                      | <p>Inclusion criteria:</p> <p>Patients were enrolled into two sub-studies:</p> <ul style="list-style-type: none"> <li>- One sub-study included patients whose femoral neck or lumbar spine BMD T-score was less than or equal to -2.5.</li> <li>- The other sub-study included patients with low BMD and one or more moderate or severe vertebral fractures or two or more mild vertebral fractures, or who had at least two moderate fractures regardless of their BMD.</li> </ul> <p>In the present report, prevalent vertebral fracture status was based upon the adjudicated fracture determination.</p> |
| <b>Interventions</b> | <p>Intervention: raloxifene 60 mg/day (N=2549)</p> <p>Control: placebo, daily (N=2565)</p>                                                                                                                                                                                                                                                                                                                                                                                                                                                                                                                   |
| <b>Outcomes</b>      | Vertebral fractures                                                                                                                                                                                                                                                                                                                                                                                                                                                                                                                                                                                          |

## Silverman 2008

### Bueno 2017

|                      |                                                                                                                                                                                                                                                                                                                                                                                                                                                                                                                                                                                                                                                                                                                                                                                                                                                                                                                                                                           |
|----------------------|---------------------------------------------------------------------------------------------------------------------------------------------------------------------------------------------------------------------------------------------------------------------------------------------------------------------------------------------------------------------------------------------------------------------------------------------------------------------------------------------------------------------------------------------------------------------------------------------------------------------------------------------------------------------------------------------------------------------------------------------------------------------------------------------------------------------------------------------------------------------------------------------------------------------------------------------------------------------------|
| <b>Methods</b>       | <p>3-year RCT, parallel-group, phase 3 trial</p> <p>206 sites in Asia–Pacific countries, Canada, Europe, Latin America, South Africa, and the United States</p>                                                                                                                                                                                                                                                                                                                                                                                                                                                                                                                                                                                                                                                                                                                                                                                                           |
| <b>Participants</b>  | <p>Full inclusion/exclusion criteria and methodology are available in the primary publication (Silverman 2008).</p> <p>Inclusion criteria: generally healthy women who were at least 2 years postmenopausal and had osteoporosis.</p> <p>Exclusion criteria: presence of any diseases/conditions that might affect bone metabolism or interfere with densitometry, pathologic vertebral fractures, any serious conditions (eg, endometrial hyperplasia or carcinoma, abnormal vaginal bleeding, malignancy within 10 years), or vasomotor symptoms requiring treatment. Women with a history or presence of venous thromboembolic events (VTEs) were also excluded. Use of androgens, systemic estrogens (except estriol <math>\leq 2.0</math> mg/d), topical estrogens (&gt;3 times/wk), progestogens, SERMs, bisphosphonates, calcitonin, parathyroid hormone, or cholecalciferol (&gt;50,000 IU/wk) within 6 months before screening was also cause for exclusion.</p> |
| <b>Interventions</b> | <p>N=7492 received intervention or placebo.</p> <p>Intervention 1: Bazedoxifene 20 mg/d</p> <p>Intervention 2: Bazedoxifene 40 mg/d</p> <p>Intervention 2: Bazedoxifene 60 mg/d</p> <p>Control: placebo, once daily</p> <p>All participants received oral calcium (up to 1200 mg/d) and vitamin D (400-800 IU/d) supplements.</p>                                                                                                                                                                                                                                                                                                                                                                                                                                                                                                                                                                                                                                         |
| <b>Outcomes</b>      | Vertebral fractures and non-vertebral fractures                                                                                                                                                                                                                                                                                                                                                                                                                                                                                                                                                                                                                                                                                                                                                                                                                                                                                                                           |



## Bruyère 2012

---

|                      |                                                                                                                                                                                                                                                                                                                                                                                                                                                                                                                                                                           |
|----------------------|---------------------------------------------------------------------------------------------------------------------------------------------------------------------------------------------------------------------------------------------------------------------------------------------------------------------------------------------------------------------------------------------------------------------------------------------------------------------------------------------------------------------------------------------------------------------------|
| <b>Methods</b>       | RCT, phase 3 trial<br>206 sites in Asia–Pacific countries, Canada, Europe, Latin America, South Africa, and the United States                                                                                                                                                                                                                                                                                                                                                                                                                                             |
| <b>Participants</b>  | Data was available for 5244 women.<br>Inclusion criteria: healthy women between the ages of 55 and 85 with at least 2 years since menopause and with osteoporosis, defined as low BMD or radiographically confirmed vertebral fractures. Subjects without prevalent vertebral fracture were required to have lumbar spine or femoral neck BMD T scores between -2.5 and -4.0 (inclusive), whereas subjects with prevalent vertebral fracture (at least one mild vertebral fracture) were required to have lumbar spine and femoral neck BMD T scores not worse than -4.0. |
| <b>Interventions</b> | 3476 women were treated with Bazedoxifene.<br>Intervention 1: Bazedoxifene 20 mg, taken orally once per day<br>Intervention 2: Bazedoxifene 40 mg, taken orally once per day<br>Control: placebo, taken orally once per day (N=1768)                                                                                                                                                                                                                                                                                                                                      |
| <b>Outcomes</b>      | Vertebral fractures                                                                                                                                                                                                                                                                                                                                                                                                                                                                                                                                                       |

---

## Kanis 2009

---

|                      |                                                                                                                                                                                                                                                                                                                                                                                                                                                                                                                                                                                                                                                                                                                                                                                                                                                                                                                                                                                                                                                                                                                                                                                                                                                                                                                                                                                                                                                                                                                                                                                 |
|----------------------|---------------------------------------------------------------------------------------------------------------------------------------------------------------------------------------------------------------------------------------------------------------------------------------------------------------------------------------------------------------------------------------------------------------------------------------------------------------------------------------------------------------------------------------------------------------------------------------------------------------------------------------------------------------------------------------------------------------------------------------------------------------------------------------------------------------------------------------------------------------------------------------------------------------------------------------------------------------------------------------------------------------------------------------------------------------------------------------------------------------------------------------------------------------------------------------------------------------------------------------------------------------------------------------------------------------------------------------------------------------------------------------------------------------------------------------------------------------------------------------------------------------------------------------------------------------------------------|
| <b>Methods</b>       | 3-year RCT, parallel group<br>Included women from the Asia/Pacific countries, Canada, Europe, Latin America, South Africa, and the United States.                                                                                                                                                                                                                                                                                                                                                                                                                                                                                                                                                                                                                                                                                                                                                                                                                                                                                                                                                                                                                                                                                                                                                                                                                                                                                                                                                                                                                               |
| <b>Participants</b>  | N=5643<br>Inclusion criteria: Generally healthy women between the ages of 55 and 85yr were eligible for study inclusion if they were at least 2 yr postmenopausal and had osteoporosis, defined as low BMD or radiographically confirmed vertebral fractures. Subjects without prevalent vertebral fracture were required to have lumbar spine or femoral neck BMD T-scores between -2.5 and -4.0 (inclusive), whereas subjects with prevalent vertebral fracture (at least one mild vertebral fracture) were required to have lumbar spine and femoral neck BMD T-scores not worse than -4.0.<br>Exclusion criteria: Women were excluded if they had diseases that may affect bone metabolism, conditions that could interfere with bone mineral densitometry, pathologic vertebral fractures, vasomotor symptoms requiring treatment, or serious conditions such as endometrial hyperplasia or carcinoma, abnormal vaginal bleeding, malignancy within 10 yr of the study, endocrine disorders requiring treatment, or untreated malabsorption disorders. Subjects with an active or history of deep vein thrombosis, pulmonary embolism, or retinal vein thrombosis were also excluded, as were subjects with elevated fasting total cholesterol or triglyceride levels ( $\geq 310$ or $\geq 300$ mg/dl, respectively). The use of androgens, systemic estrogen (except estriol $\leq 2.0$ mg/d), topical estrogen ( $>3$ times/wk), progestogens, SERMs, bisphosphonates, calcitonin, PTH, and cholecalciferol ( $>50,000$ IU/wk) was prohibited within 6 mo of screening. |
| <b>Interventions</b> | Intervention 1: bazedoxifene 20 mg/day (N=1886)<br>Intervention 2: bazedoxifene 40 mg/day (N=1872)<br>Control: placebo, daily (N=1885)                                                                                                                                                                                                                                                                                                                                                                                                                                                                                                                                                                                                                                                                                                                                                                                                                                                                                                                                                                                                                                                                                                                                                                                                                                                                                                                                                                                                                                          |

---

|                 |                                                 |
|-----------------|-------------------------------------------------|
| <b>Outcomes</b> | Clinical, vertebral and non-vertebral fractures |
|-----------------|-------------------------------------------------|

### Kaufman 2013

|                      |                                                                                                                                                                                                                                                                                                                                                                                                                                                                                                                                                             |
|----------------------|-------------------------------------------------------------------------------------------------------------------------------------------------------------------------------------------------------------------------------------------------------------------------------------------------------------------------------------------------------------------------------------------------------------------------------------------------------------------------------------------------------------------------------------------------------------|
| <b>Methods</b>       | Phase III RCT, parallel group<br>International, multicenter                                                                                                                                                                                                                                                                                                                                                                                                                                                                                                 |
| <b>Participants</b>  | 7492 women were included<br>Inclusion criteria: Postmenopausal women aged 55 to 85 years who had osteoporosis, defined as a lumbar spine or femoral neck BMD T-score of $\leq -2.5$ or presence of at least one radiologically confirmed prior vertebral fracture.<br>Exclusion criteria: Exclusion criteria included diseases that affect bone metabolism, malignancy, endometrial hyperplasia or carcinoma, a history of venous thromboembolic disease, an abnormal lipid profile, or use of certain hormonal medications for 6 months prior to screening |
| <b>Interventions</b> | Treatment duration: 3 years<br>Intervention 1: bazedoxifene 20 mg/day (N=1886)<br>Intervention 2: bazedoxifene 40 mg/day (N=1872)<br>Intervention 3: raloxifene 60 mg/day (N=1849)<br>Control: placebo, daily (N=1885)                                                                                                                                                                                                                                                                                                                                      |
| <b>Outcomes</b>      | Clinical, vertebral and non-vertebral fractures                                                                                                                                                                                                                                                                                                                                                                                                                                                                                                             |

### Silverman 2008

|                     |                                                                                                                                                                                                                                                                                                                                                                                                                                                                                                                                                                                                                                                                                                                                                                                                                                                                                                                                                                                                                                                                                                                                                                                                                                                                                                                                                                                                                                                                                                                                                                                                                                                                                            |
|---------------------|--------------------------------------------------------------------------------------------------------------------------------------------------------------------------------------------------------------------------------------------------------------------------------------------------------------------------------------------------------------------------------------------------------------------------------------------------------------------------------------------------------------------------------------------------------------------------------------------------------------------------------------------------------------------------------------------------------------------------------------------------------------------------------------------------------------------------------------------------------------------------------------------------------------------------------------------------------------------------------------------------------------------------------------------------------------------------------------------------------------------------------------------------------------------------------------------------------------------------------------------------------------------------------------------------------------------------------------------------------------------------------------------------------------------------------------------------------------------------------------------------------------------------------------------------------------------------------------------------------------------------------------------------------------------------------------------|
| <b>Methods</b>      | Phase 3 RCT, parallel group<br>206 sites in Asia-Pacific countries, Canada, Europe, Latin America, South Africa, and the United States                                                                                                                                                                                                                                                                                                                                                                                                                                                                                                                                                                                                                                                                                                                                                                                                                                                                                                                                                                                                                                                                                                                                                                                                                                                                                                                                                                                                                                                                                                                                                     |
| <b>Participants</b> | 7492 women were randomized to treatment and received at least one dose of study medication; 87% were white<br>Inclusion criteria: Generally healthy women between the ages of 55 and 85yr were eligible for study inclusion if they were at least 2 yr postmenopausal and had osteoporosis, defined as low BMD or radiographically confirmed vertebral fractures. Subjects without prevalent vertebral fracture were required to have lumbar spine or femoral neck BMD T-scores between $-2.5$ and $-4.0$ (inclusive), whereas subjects with prevalent vertebral fracture (at least one mild vertebral fracture) were required to have lumbar spine and femoral neck BMD T-scores not worse than $-4.0$ .<br>Exclusion criteria: Women were excluded if they had diseases that may affect bone metabolism, conditions that could interfere with bone mineral densitometry, pathologic vertebral fractures, vasomotor symptoms requiring treatment, or serious conditions such as endometrial hyperplasia or carcinoma, abnormal vaginal bleeding, malignancy within 10 yr of the study, endocrine disorders requiring treatment, or untreated malabsorption disorders. Subjects with an active or history of deep vein thrombosis, pulmonary embolism, or retinal vein thrombosis were also excluded, as were subjects with elevated fasting total cholesterol or triglyceride levels ( $\geq 310$ or $\geq 300$ mg/dl, respectively). The use of androgens, systemic estrogen (except estriol $\leq 2.0$ mg/d), topical estrogen ( $>3$ times/wk), progestogens, SERMs, bisphosphonates, calcitonin, PTH, and cholecalciferol ( $>50,000$ IU/wk) was prohibited within 6 mo of screening. |

|                      |                                                                                                                                                                                                                                                  |
|----------------------|--------------------------------------------------------------------------------------------------------------------------------------------------------------------------------------------------------------------------------------------------|
| <b>Interventions</b> | Intervention 1: bazedoxifene 20 mg, orally once daily (N=1886)<br>Intervention 2: bazedoxifene 40 mg, orally once daily (N=1872)<br>Intervention 3: raloxifene 60 mg, orally once daily (N=1849)<br>Control: placebo, orally once daily (N=1885) |
| <b>Outcomes</b>      | Vertebral fractures                                                                                                                                                                                                                              |

## The VERO (The VERtebral fracture treatment comparisons in Osteoporotic women) Study

### Body 2020

|                      |                                                                                                                                                                                                                                                                                                                                                                                                                                                                                                                                                                                                                                                                                                                                                                                                                                                                                                                                                                                                                     |
|----------------------|---------------------------------------------------------------------------------------------------------------------------------------------------------------------------------------------------------------------------------------------------------------------------------------------------------------------------------------------------------------------------------------------------------------------------------------------------------------------------------------------------------------------------------------------------------------------------------------------------------------------------------------------------------------------------------------------------------------------------------------------------------------------------------------------------------------------------------------------------------------------------------------------------------------------------------------------------------------------------------------------------------------------|
| <b>Methods</b>       | VERtebral fracture treatment comparison in Osteoporotic women (VERO) trial:<br>International, multicenter, randomized, double-blind, active-controlled, parallel group, 24-month trial<br>Clinical trial information: ClinicalTrials.gov Identifier: NCT01709110                                                                                                                                                                                                                                                                                                                                                                                                                                                                                                                                                                                                                                                                                                                                                    |
| <b>Participants</b>  | Inclusion criteria: Eligible participants were ambulatory postmenopausal women aged > 45 years with a baseline bone mineral density (BMD) T-score less than or equal to -1.50 standard deviations (SD) at the femoral neck, total hip, or lumbar spine. Patients had to have radiographic evidence of at least two moderate (between a 26% and 40% reduction in vertebral body height) or one severe (more than 40% reduction in vertebral body height) prevalent vertebral fragility fractures according to the classification of Genant et al.. Prior use of bisphosphonates or other osteoporosis drugs was allowed.<br><br>Exclusion criteria: Patients were excluded if they had (a) low serum 25-hydroxy-vitamin D levels (< 9.2 ng/mL or 23 nmol/L), (b) abnormally elevated serum intact parathyroid hormone (PTH [1-84]) at baseline (> 72 pg/mL or > 7.6 pmol/L), or (c) significantly impaired renal function as defined by a calculated endogenous creatinine clearance of < 30 mL/min/m <sup>2</sup> . |
| <b>Interventions</b> | Intervention: 20 µg daily of s.c. teriparatide plus an oral weekly placebo (N=680)<br>Control: 35 mg weekly of oral risedronate plus daily injections of placebo (N=680)                                                                                                                                                                                                                                                                                                                                                                                                                                                                                                                                                                                                                                                                                                                                                                                                                                            |
| <b>Outcomes</b>      | Clinical, vertebral and non-vertebral fractures                                                                                                                                                                                                                                                                                                                                                                                                                                                                                                                                                                                                                                                                                                                                                                                                                                                                                                                                                                     |

### Geusens 2018

|                      |                                                                                                                                                                                                                  |
|----------------------|------------------------------------------------------------------------------------------------------------------------------------------------------------------------------------------------------------------|
| <b>Methods</b>       | VERO: a RCT, parallel group                                                                                                                                                                                      |
| <b>Participants</b>  | Inclusion criteria: post- menopausal women with at least 2 moderate or 1 severe VFx, according to the classification of Genant and colleagues, and a BMD T -score of -1.5 were enrolled.<br>Exclusion criteria:  |
| <b>Interventions</b> | Treatment duration: 24 months<br>Intervention: 20 mg of s.c. teriparatide once daily plus oral weekly placebo (N=680)<br>Control: 35 mg of oral risedronate once weekly plus daily injections of placebo (N=680) |
| <b>Outcomes</b>      | Clinical and vertebral fractures                                                                                                                                                                                 |

## Geusens 2020

|                      |                                                                                                                                                                                                                                                                                                                                                                                                                                                                                                                                                                                                                                                                                                                                                                                                                                                                                                                                                                       |
|----------------------|-----------------------------------------------------------------------------------------------------------------------------------------------------------------------------------------------------------------------------------------------------------------------------------------------------------------------------------------------------------------------------------------------------------------------------------------------------------------------------------------------------------------------------------------------------------------------------------------------------------------------------------------------------------------------------------------------------------------------------------------------------------------------------------------------------------------------------------------------------------------------------------------------------------------------------------------------------------------------|
|                      | Post hoc analysis                                                                                                                                                                                                                                                                                                                                                                                                                                                                                                                                                                                                                                                                                                                                                                                                                                                                                                                                                     |
| <b>Methods</b>       | The vertebral fracture treatment comparisons in osteoporotic women (VERO): international, multicenter, randomized, double-blind, active-controlled, parallel-group, 24-month trial<br>116 centers in 14 countries across Europe, South and North America.                                                                                                                                                                                                                                                                                                                                                                                                                                                                                                                                                                                                                                                                                                             |
| <b>Participants</b>  | Inclusion criteria: Eligible participants were ambulatory postmenopausal women aged >45 years with a baseline BMD T-score less than or equal to -1.50 standard deviations (SD) at the femoral neck, total hip, or lumbar spine, assessed at the study site. Patients had to have radiographic evidence of at least two moderate (a reduction in vertebral body height of 26–40%) or one severe (>40% reduction) prevalent vertebral fragility fracture according to the classification of Genant et al. Prior use of bisphosphonates or other osteoporosis drugs was allowed.<br>Exclusion criteria: Patients were excluded if they had (a) low serum 25-hydroxy-vitamin D levels (< 9.2 ng/mL or 23 nmol/L), (b) abnormally elevated serum intact parathyroid hormone (PTH [1-84]) at baseline (> 72 pg/mL or > 7.6 pmol/L), or (c) significantly impaired renal function as defined by a calculated endogenous creatinine clearance of < 30 mL/min/m <sup>2</sup> . |
| <b>Interventions</b> | Intervention 1: injectable subcutaneous teriparatide (20 µg daily) plus an oral weekly placebo<br>Intervention 2: oral risedronate (35 mg weekly) plus an injectable subcutaneous daily placebo                                                                                                                                                                                                                                                                                                                                                                                                                                                                                                                                                                                                                                                                                                                                                                       |
| <b>Outcomes</b>      | Vertebral fractures                                                                                                                                                                                                                                                                                                                                                                                                                                                                                                                                                                                                                                                                                                                                                                                                                                                                                                                                                   |

## Kendler 2018

|                     |                                                                                                                                                                                                                                                                                                                                                                                                                                                                                                                                                                                                                                                                                                                                                                                                                                                                                                                                                                                                                                                                                                                                                                                                                                                                                                                                                                                                                                                                                                               |
|---------------------|---------------------------------------------------------------------------------------------------------------------------------------------------------------------------------------------------------------------------------------------------------------------------------------------------------------------------------------------------------------------------------------------------------------------------------------------------------------------------------------------------------------------------------------------------------------------------------------------------------------------------------------------------------------------------------------------------------------------------------------------------------------------------------------------------------------------------------------------------------------------------------------------------------------------------------------------------------------------------------------------------------------------------------------------------------------------------------------------------------------------------------------------------------------------------------------------------------------------------------------------------------------------------------------------------------------------------------------------------------------------------------------------------------------------------------------------------------------------------------------------------------------|
| <b>Methods</b>      | The VERO study: randomised, double-blind, active-controlled, parallel-group trial<br>123 centers in 14 countries in Europe, South America and North America                                                                                                                                                                                                                                                                                                                                                                                                                                                                                                                                                                                                                                                                                                                                                                                                                                                                                                                                                                                                                                                                                                                                                                                                                                                                                                                                                   |
| <b>Participants</b> | 1366 women participated in the VERO study (680 women in each treatment group started the treatment); most of the participants were white<br>1013 women completed the trial (74.2%)<br>Inclusion criteria: ambulatory post-menopausal women older than 45 years of age with a bone mineral density T score less than or equal to -1.50 SDs at the femoral neck, total hip, or lumbar spine. Participants had to have radiographic evidence of at least two moderate (i.e., a reduction in vertebral body height of 26–40%) or one severe (more than 40% reduction) prevalent vertebral fragility fracture according to the classification of Genant and colleagues.<br>Exclusion criteria: We excluded patients with unresolved skeletal diseases other than osteoporosis, malignant tumors in the 5 years before screening, osteonecrosis of the jaw, previous atypical subtrochanteric femoral fractures, risk factors for osteosarcoma, gastrointestinal disorders contraindicating risedronate, significantly impaired hepatic function, or a calculated creatinine clearance less than 30 mL/min using the Cockcroft-Gault equation. We also excluded patients who had undergone kyphoplasty or vertebroplasty at three or more levels before randomisation or within the 6 months before randomisation. Participants had to have normal baseline serum albumin-corrected calcium, parathyroid hormone, and free thyroxine concentrations, and 25-hydroxy-vitamin D concentration greater than 23 nmol/L. |

|                      |                                                                                                                                                                                                 |
|----------------------|-------------------------------------------------------------------------------------------------------------------------------------------------------------------------------------------------|
|                      | Treatment phase of 24 months                                                                                                                                                                    |
| <b>Interventions</b> | Intervention: injectable subcutaneous teriparatide 20 µg daily plus an oral weekly placebo (N=680)<br>Control: oral risedronate 35 mg weekly plus injectable subcutaneous daily placebo (N=680) |
| <b>Outcomes</b>      | Clinical, vertebral and non-vertebral fractures                                                                                                                                                 |

## Kendler 2020

|                      |                                                                                                                                                                                                                                                                                                                                                                                                                                                                                                                                                                                                                                                                                                                            |
|----------------------|----------------------------------------------------------------------------------------------------------------------------------------------------------------------------------------------------------------------------------------------------------------------------------------------------------------------------------------------------------------------------------------------------------------------------------------------------------------------------------------------------------------------------------------------------------------------------------------------------------------------------------------------------------------------------------------------------------------------------|
| <b>Methods</b>       | The VERtebral fracture treatment comparisons in Osteoporotic women (VERO) trial: international, multicenter, randomized, double-blind, active-controlled, parallel-group, 24-month trial                                                                                                                                                                                                                                                                                                                                                                                                                                                                                                                                   |
| <b>Participants</b>  | Inclusion criteria: ambulatory postmenopausal women over 45 years of age with a BMD T-score $\leq -1.5$ standard deviations at the femoral neck, total hip, or lumbar spine, and radiographic evidence of at least 2 moderate or 1 severe prevalent vertebral fragility fractures according to the classification of Genant et al.<br>Exclusion criteria: Exclusion criteria included low serum 25-hydroxy-vitamin D (25OHD) levels ( $< 9.2$ ng/mL or 23 nmol/L), abnormally elevated serum intact parathyroid hormone (PTH [1–84]) at baseline ( $> 72$ pg/mL or $> 7.6$ pmol/L), and significantly impaired renal function as defined by a calculated endogenous creatinine clearance of $< 30$ mL/min/m <sup>2</sup> . |
| <b>Interventions</b> | Treatment 1: injectable subcutaneous teriparatide (20 µg) daily plus an oral weekly placebo<br>Treatment 2: oral risedronate (35 mg) weekly plus injectable subcutaneous daily placebo                                                                                                                                                                                                                                                                                                                                                                                                                                                                                                                                     |
| <b>Outcomes</b>      | Vertebral, clinical, non-vertebral and major non-vertebral fractures                                                                                                                                                                                                                                                                                                                                                                                                                                                                                                                                                                                                                                                       |

## Minisola 2019

|                      |                                                                                                                                                                                                                                                                                                                                                                                                                                                                                                                                                                                                                                                                                                                                                                                                                                                                      |
|----------------------|----------------------------------------------------------------------------------------------------------------------------------------------------------------------------------------------------------------------------------------------------------------------------------------------------------------------------------------------------------------------------------------------------------------------------------------------------------------------------------------------------------------------------------------------------------------------------------------------------------------------------------------------------------------------------------------------------------------------------------------------------------------------------------------------------------------------------------------------------------------------|
| <b>Methods</b>       | The VERO study: an international, multicenter, randomized, double-blind, active-controlled, parallel-group, 24 months trial (ClinicalTrials.gov Identifier: NCT01709110).                                                                                                                                                                                                                                                                                                                                                                                                                                                                                                                                                                                                                                                                                            |
| <b>Participants</b>  | 1360 women included in the VERO study; 74.2 % completed the 24-month trial<br>Inclusion criteria: ambulatory postmenopausal women over 45 years of age with a bone mineral density Tscore $\leq -1.5$ standard deviations (SDs) at the femoral neck, total hip, or lumbar spine, and with radiographic evidence of at least two moderate or one severe prevalent vertebral fragility fracture according to the classification of Genant et al.<br>Exclusion criteria: Patients with serum 25(OH)D levels $< 9.2$ ng/mL (23 nmol/L) were excluded from the study, as well as patients with abnormally elevated values of serum intact parathyroid hormone (PTH) (1–84) at baseline defined as $> 72$ pg/mL (or $> 7.6$ pmol/L) and significantly impaired renal function as defined by a calculated endogenous creatinine clearance of $< 30$ mL/min/m <sup>2</sup> . |
| <b>Interventions</b> | Treatment duration: 24 months<br>Intervention: injectable subcutaneous teriparatide 20 µg daily plus an oral weekly placebo (N=680)<br>Control: oral risedronate 35 mg weekly plus injectable subcutaneous daily placebo (N=680)                                                                                                                                                                                                                                                                                                                                                                                                                                                                                                                                                                                                                                     |

|                 |                                                 |
|-----------------|-------------------------------------------------|
| <b>Outcomes</b> | Clinical, vertebral and non-vertebral fractures |
|-----------------|-------------------------------------------------|

## The VERT (Vertebral Efficacy with Risedronate Therapy) Trials

### Harris 1999

|                      |                                                                                                                                                                                                                                                                                                                                                                                                                                                                                                                                                                                                                                                                                                                                                                                                                                                                                                                                                                                          |
|----------------------|------------------------------------------------------------------------------------------------------------------------------------------------------------------------------------------------------------------------------------------------------------------------------------------------------------------------------------------------------------------------------------------------------------------------------------------------------------------------------------------------------------------------------------------------------------------------------------------------------------------------------------------------------------------------------------------------------------------------------------------------------------------------------------------------------------------------------------------------------------------------------------------------------------------------------------------------------------------------------------------|
| <b>Methods</b>       | VERT: a RCT, parallel group<br>110 study centers in North America                                                                                                                                                                                                                                                                                                                                                                                                                                                                                                                                                                                                                                                                                                                                                                                                                                                                                                                        |
| <b>Participants</b>  | 2458 women met the entry criteria; 96% were white<br>Inclusion criteria: No older than 85 years; if 5 years had elapsed since natural or surgical menopause, and if they had either 2 or more radiographically identified vertebral fractures (T4-L4, inclusive) or 1 vertebral fracture and lumbar-spine (L1-L4) BMD (defined as $\leq 0.83$ g/cm <sup>2</sup> [Hologic instrument] or $\leq 0.94$ g/cm <sup>2</sup> [Lunar instrument]). These values represent a t-score of -2 (2 SDs below the mean for young adults).<br>Exclusion criteria: Women were excluded if they had conditions that might interfere with the evaluation of spinal bone loss, or if they had received drugs known to affect bone metabolism (such as calcitonin, calcitriol or cholecalciferol supplements within 1 mo prior to study entry; anabolic steroids, estrogen or estrogen-related drugs, or progestins within 3 mo; or bisphosphonates, fluoride or subcutaneous estrogen implants within 6 mo). |
| <b>Interventions</b> | Treatment duration: 3 years<br>Intervention 1: risedronate 5 mg/day, once daily for 3 year (N=813)<br>Control: placebo, once daily for 3 years (N=815)                                                                                                                                                                                                                                                                                                                                                                                                                                                                                                                                                                                                                                                                                                                                                                                                                                   |
| <b>Outcomes</b>      | Vertebral, non-vertebral and hip fractures                                                                                                                                                                                                                                                                                                                                                                                                                                                                                                                                                                                                                                                                                                                                                                                                                                                                                                                                               |

### Kanis 2005

|                     |                                                                                                                                                                                                                                                                                                                                                                                                                                                                                                                                                                                                                                                                                                          |
|---------------------|----------------------------------------------------------------------------------------------------------------------------------------------------------------------------------------------------------------------------------------------------------------------------------------------------------------------------------------------------------------------------------------------------------------------------------------------------------------------------------------------------------------------------------------------------------------------------------------------------------------------------------------------------------------------------------------------------------|
| <b>Methods</b>      | VERT-MN and VERT-NA: phase III RCT<br>VERT-MN – Europe and Australasia<br>VERT-NA – North America                                                                                                                                                                                                                                                                                                                                                                                                                                                                                                                                                                                                        |
| <b>Participants</b> | N=1802 patients that had paired spine radiographs<br>Inclusion criteria:<br>VERT-MN – enrolled postmenopausal women with at least two prevalent vertebral fractures;<br>VERT-NA – enrolled postmenopausal women with either low lumbar spine BMD (T-score $\leq -2$ SD) and one radiographically confirmed prevalent vertebral fracture or at least two prevalent vertebral fractures irrespective of BMD.<br>In both trials, patients were required to be ambulatory, <85 years of age, and at least 5 years postmenopausal<br>Exclusion criteria: Randomized trial of the effects of risedronate on vertebral fractures in women with established postmenopausal osteoporosis. Vertebral Efficacy with |

|                      |                                                                                                                                                     |
|----------------------|-----------------------------------------------------------------------------------------------------------------------------------------------------|
|                      | Risedronate Therapy (VERT) Study Group. Those patients enrolled because of low lumbar spine BMD and one prevalent vertebral fracture were excluded. |
|                      | Treatment duration: 3 years                                                                                                                         |
| <b>Interventions</b> | Intervention: risedronate 5 mg, daily (N=892)<br>Control: placebo, daily (N=910)                                                                    |
| <b>Outcomes</b>      | Vertebral fractures                                                                                                                                 |

### Reginster 2000

|                      |                                                                                                                                                                                                                                                                                                                                                                                                                                                                                                                                                                                                   |
|----------------------|---------------------------------------------------------------------------------------------------------------------------------------------------------------------------------------------------------------------------------------------------------------------------------------------------------------------------------------------------------------------------------------------------------------------------------------------------------------------------------------------------------------------------------------------------------------------------------------------------|
|                      | RCT, parallel group                                                                                                                                                                                                                                                                                                                                                                                                                                                                                                                                                                               |
| <b>Methods</b>       | Study duration: 3 years<br>80 study centers in Europe and Australia                                                                                                                                                                                                                                                                                                                                                                                                                                                                                                                               |
| <b>Participants</b>  | 1226 women were randomized<br>Inclusion criteria: Ambulatory women up to 85 years old and at least 5 years postmenopausal were eligible if they had at least two radiographically confirmed vertebral (T4–L4) fractures.<br>Exclusion criteria: Exclusion criteria included conditions that might interfere with evaluation of spinal osteoporosis, and use of calcitonin, calcitriol or vitamin D supplements within 1 month, anabolic steroids, estrogen, estrogen-related drugs or progestogen within 3 months, or bisphosphonates, fluoride or subcutaneous estrogen implant within 6 months. |
| <b>Interventions</b> | Intervention 1: risedronate 2.5 mg, once daily for 2 years (N=410)<br>Intervention 2: risedronate 5 mg, once daily for 3 years (N=408)<br>Control: placebo, once daily for 3 years (N=408)                                                                                                                                                                                                                                                                                                                                                                                                        |
| <b>Outcomes</b>      | Vertebral, non-vertebral and hip fractures                                                                                                                                                                                                                                                                                                                                                                                                                                                                                                                                                        |

### Watts 2003

|                     |                                                                                                                                                                                                                                                                                                                                                                                                                                                                                                                                                                                                                                                                                                                                                                                                                                                                                                                                                                                                                                                                                                                    |
|---------------------|--------------------------------------------------------------------------------------------------------------------------------------------------------------------------------------------------------------------------------------------------------------------------------------------------------------------------------------------------------------------------------------------------------------------------------------------------------------------------------------------------------------------------------------------------------------------------------------------------------------------------------------------------------------------------------------------------------------------------------------------------------------------------------------------------------------------------------------------------------------------------------------------------------------------------------------------------------------------------------------------------------------------------------------------------------------------------------------------------------------------|
| <b>Methods</b>      | Analysis using data from two similar randomized, double-blind, placebo-controlled studies of the effect of risedronate on vertebral fracture, Vertebral Efficacy with Risedronate Therapy (VERT) Multinational (VERT-MN) and VERT-North America (VERT-NA)                                                                                                                                                                                                                                                                                                                                                                                                                                                                                                                                                                                                                                                                                                                                                                                                                                                          |
| <b>Participants</b> | Inclusion criteria: In both studies, patients were required to be ambulatory, no older than 85 yr of age, and at least 5 yr postmenopausal:<br>- VERT-MN enrolled 1226 postmenopausal women at 80 centers in Europe and Australia. Patients in this study were required to have two or more prevalent radiographically confirmed thoracolumbar (T4–L4) vertebral fractures.<br>- VERT-NA enrolled 2458 postmenopausal women at 110 centers in North America. Patients were required to have two or more prevalent radiographically confirmed vertebral fractures (T4–L4) or one vertebral fracture and low lumbar spine (L1–L4) bone mineral density [BMD; defined as $\leq 0.83$ g/cm <sup>2</sup> (Hologic instrument) or $\leq 0.94$ g/cm <sup>2</sup> (Lunar instrument)]. The cutoff values for low lumbar spine BMD represent a T-score of -2 (2 SD values below the mean for young adults).<br>Exclusion criteria: Women were excluded from the studies if they had conditions that might interfere with the evaluation of spinal bone loss, or if they had received drugs known to affect bone metabolism. |

|                      |                                                                                                       |
|----------------------|-------------------------------------------------------------------------------------------------------|
| <b>Interventions</b> | Intervention 1: risedronate 2.5 mg/d<br>Intervention 2: risedronate 5 mg/d<br>Control: placebo, daily |
| <b>Outcomes</b>      | Vertebral fractures                                                                                   |

## The VERT trials and the HIP trial

### Roux 2012

|                      |                                                                                                                                                                                                                                                                                                                                                                                     |
|----------------------|-------------------------------------------------------------------------------------------------------------------------------------------------------------------------------------------------------------------------------------------------------------------------------------------------------------------------------------------------------------------------------------|
| <b>Methods</b>       | Posthoc analysis of subset of patients participating in three prospective, randomized, placebo controlled clinical trials, with durations of up to 3 years (Vertebral Efficacy with Risedronate Trial–MultiNational (VERT-MN); Vertebral Efficacy with Risedronate Trial–North America (VERT-NA); and the risedronate Hip Intervention Program (HIP)). North America, Multinational |
| <b>Participants</b>  | N=5454<br>Inclusion criteria: Subjects that had participated the VERT-MN, VERT-NA and HIP and that received risedronate 5 mg/day or placebo with paired evaluable spinal X-rays.                                                                                                                                                                                                    |
| <b>Interventions</b> | Intervention: Risedronate 5mg/day (N=2729)<br>Control: placebo (N=2725)                                                                                                                                                                                                                                                                                                             |
| <b>Outcomes</b>      | Vertebral fractures                                                                                                                                                                                                                                                                                                                                                                 |

### Seibel 2004

|                      |                                                                                                                                                                                                                                                                                                                                                                                                                                                                                                                                                                                                                                                                                                                                                     |
|----------------------|-----------------------------------------------------------------------------------------------------------------------------------------------------------------------------------------------------------------------------------------------------------------------------------------------------------------------------------------------------------------------------------------------------------------------------------------------------------------------------------------------------------------------------------------------------------------------------------------------------------------------------------------------------------------------------------------------------------------------------------------------------|
| <b>Methods</b>       | Subgroup analysis using data from 3 large clinical trials - the multinational and the North American VERT (Vertebral Efficacy with Risedronate Therapy) and the HIP (Hip Intervention Program) studies.                                                                                                                                                                                                                                                                                                                                                                                                                                                                                                                                             |
| <b>Participants</b>  | N=1593<br>Inclusion criteria:<br>- VERT trials - postmenopausal women with two vertebral fractures or one vertebral fracture and a low lumbar spine BMD (T-score < -2 SD),<br>- HIP trial - postmenopausal women 70–79 years of age with low femoral neck BMD (T-score < -3 SD) or at least 80 years of age with at least one non-skeletal risk factor for hip fracture,<br>- subset of patients specifically for this study: Patients from the VERT trial and patients with a baseline femoral neck T-score $\leq$ -2.5 SD from the HIP trial. Patients who had baseline measurements of urinary excretion of deoxyypyridinoline and took at least one dose of study medication and had baseline and at least one post-baseline spinal radiograph. |
| <b>Interventions</b> | Treatment duration: 3 years<br>Intervention: risedronate 5 mg, daily (n=795)<br>Control: placebo, daily (n=798)                                                                                                                                                                                                                                                                                                                                                                                                                                                                                                                                                                                                                                     |
| <b>Outcomes</b>      | Vertebral fractures                                                                                                                                                                                                                                                                                                                                                                                                                                                                                                                                                                                                                                                                                                                                 |



## Watts 2005

|                      |                                                                                                                                                                                                                                                                                                              |
|----------------------|--------------------------------------------------------------------------------------------------------------------------------------------------------------------------------------------------------------------------------------------------------------------------------------------------------------|
| <b>Methods</b>       | Analysis using data from 3 randomized, double-blind, placebo-controlled, parallel group, phase III clinical studies conducted in parallel: the Vertebral Efficacy with Risedronate Therapy North America (VERT-NA) and Multinational (VERT-MN) clinical studies and the Hip Intervention Program (HIP) study |
| <b>Participants</b>  | N=3979                                                                                                                                                                                                                                                                                                       |
| <b>Interventions</b> | Treatment duration: up to 3 years<br>Intervention: risedronate 2.5 mg or 5 mg, daily (n=1418)<br>Control: placebo, daily (n=2561)                                                                                                                                                                            |
| <b>Outcomes</b>      | Non-vertebral fractures                                                                                                                                                                                                                                                                                      |

## The VERT and BMD trials

### Siris 2008

|                      |                                                                                                                                                                                                                                                                                                                                                                           |
|----------------------|---------------------------------------------------------------------------------------------------------------------------------------------------------------------------------------------------------------------------------------------------------------------------------------------------------------------------------------------------------------------------|
| <b>Methods</b>       | Posthoc analysis with data from the subsets of postmenopausal women with osteopenia from 4 RCTs: BMD Multinational, BMD North America, VERT Multinational and VERT North America.                                                                                                                                                                                         |
| <b>Participants</b>  | N=620<br>Inclusion criteria: postmenopausal women who had no radiographic vertebral fractures at baseline and had a femoral neck T-score between -1 and -2.5 SD as measured by DXA (NHANES III).<br>Exclusion criteria: patients treated with estrogen and estrogen-related drugs within 3 months of study entry or for more than 1 month within 6 months of study entry. |
| <b>Interventions</b> | Treatment duration: 1.5 to 3 years<br>Intervention: risedronate 5mg/day (N=311)<br>Control: placebo, daily (N=309)                                                                                                                                                                                                                                                        |
| <b>Outcomes</b>      | Major osteoporotic, vertebral and non-vertebral fractures                                                                                                                                                                                                                                                                                                                 |

## The ZEST (Zoledronic acid in frail Elders to STrengthen bone) study

### Greenspan 2015

|                      |                                                                                                                                                                                                                                                                                                                                                                                                                                                                                                                                                                                                                                                                                                                                                                                                                                                                                                                                                                                                                                                                                                                                                                           |
|----------------------|---------------------------------------------------------------------------------------------------------------------------------------------------------------------------------------------------------------------------------------------------------------------------------------------------------------------------------------------------------------------------------------------------------------------------------------------------------------------------------------------------------------------------------------------------------------------------------------------------------------------------------------------------------------------------------------------------------------------------------------------------------------------------------------------------------------------------------------------------------------------------------------------------------------------------------------------------------------------------------------------------------------------------------------------------------------------------------------------------------------------------------------------------------------------------|
| <b>Methods</b>       | ZEST (the Zoledronic acid in frail Elders to STrengthen bone study): a 2-year RCT, parallel group<br>Pittsburgh, Pennsylvania area                                                                                                                                                                                                                                                                                                                                                                                                                                                                                                                                                                                                                                                                                                                                                                                                                                                                                                                                                                                                                                        |
| <b>Participants</b>  | N=181<br>Inclusion criteria: We included frail women 65 years or older who resided in a nursing home or assisted-living facility, who were not receiving a bisphosphonate, and who had either a history of vertebral or hip fracture or a measured BMD below the treatment cutoff for osteoporosis (based on 2003 National Osteoporosis Foundation guidelines: lower than $-2.0$ SD at the spine, hip, or radius [i.e., more than 2 standard deviations below the bone density of a healthy 30-year-old]). All women whose 25-hydroxyvitamin D levels were lower than 20 ng/dL received vitamin D supplements (50 000 IU/wk for 2 months) and were rescreened. All participants received a daily divided dose of vitamin D (800 IU/d) and 1200 mg/d of elemental calcium (supplement plus diet). We included women who had cognitive and functional impairment, immobility, multiple medical conditions, and who were prescribed multiple medications (including glucocorticoids and antiseizure medications).<br>Exclusion criteria: We excluded those with a projected life expectancy of less than 2 years or an estimated glomerular filtration rate below 30 mL/min. |
| <b>Interventions</b> | Intervention: zoledronic acid 5 mg, one infusion(N=89)<br>Control: placebo, one infusion (N=92)                                                                                                                                                                                                                                                                                                                                                                                                                                                                                                                                                                                                                                                                                                                                                                                                                                                                                                                                                                                                                                                                           |
| <b>Outcomes</b>      | Clinical and vertebral fractures                                                                                                                                                                                                                                                                                                                                                                                                                                                                                                                                                                                                                                                                                                                                                                                                                                                                                                                                                                                                                                                                                                                                          |

S5 Table. Funding and conflict of interest statements of included studies

| Reference          | Funding sources / Sources of support                                                                                                                                                                                                                                                                                                                                           | Conflict of interest                                                                                                                                                                                                                                                                                                                                                                                                                                                                                                                                                                                                                                                                                                  |
|--------------------|--------------------------------------------------------------------------------------------------------------------------------------------------------------------------------------------------------------------------------------------------------------------------------------------------------------------------------------------------------------------------------|-----------------------------------------------------------------------------------------------------------------------------------------------------------------------------------------------------------------------------------------------------------------------------------------------------------------------------------------------------------------------------------------------------------------------------------------------------------------------------------------------------------------------------------------------------------------------------------------------------------------------------------------------------------------------------------------------------------------------|
| Author Year        | (as stated in the manuscript)                                                                                                                                                                                                                                                                                                                                                  | (as stated in the manuscript)                                                                                                                                                                                                                                                                                                                                                                                                                                                                                                                                                                                                                                                                                         |
| Adachi 2009        | Financial support for this research and its publication was provided by Merck & Co., Inc., Rahway, New Jersey, the manufacturer of Fosamax.                                                                                                                                                                                                                                    | Drs. Adachi, Faraawi, O'Mahony, and Nayar have received funding from Merck for clinical studies and/or have acted as consultants or speakers for Merck. Dr. Massaad, Ms. Yacik, and Dr. Evans are employees of Merck and may hold stock options in the company. Dr. Adachi has received consultant's fees from, been a member of the speakers' bureau of, or participated in clinical trials for Amgen Canada Inc., AstraZeneca Pharmaceuticals LP, Eli Lilly Canada Inc., GlaxoSmithKline, Merck, Novartis Pharmaceuticals Corporation, Pfizer Inc., Procter and Gamble Pharmaceuticals, Roche Diagnostics Corp, sanofi-aventis Canada Inc., Servier, and Wyeth Pharmaceuticals.                                     |
| Adami 2008         | This study was funded by Lilly Research Laboratories, Eli Lilly and Company, Indianapolis IN.                                                                                                                                                                                                                                                                                  | Drs. Li Xie, Gail P. Dalsky, and Adrien Sipos are full-time employees of Eli Lilly and Company. Dr. Javier San Martin was an employee of Eli Lilly and Company at the time the study was done. This study was funded by Lilly Research Laboratories, Eli Lilly and Company, Indianapolis IN.                                                                                                                                                                                                                                                                                                                                                                                                                          |
| Anastasilakis 2015 | Not stated.                                                                                                                                                                                                                                                                                                                                                                    | Athanasios D. Anastasilakis has received lecture fees and research grant from Amgen and lecture fees from Lilly; Stergios A. Polyzos has received lecture fee and research grant from Amgen; Athina Gkiomisi, Zacharias G. Saridakis, Dimitrios Digkas, Ilias Bisbinas, Grigorios T. Sakellariou, Athanasios Papatheodorou, and Panagiotis Kokkoris have nothing to declare. Polyzois Makras has received lecture fees and research grants from Amgen, and lecture fees from Glaxo, Lilly, Pfizer, Leo, Genesis, ELPEN, VIANEX. Neither Amgen nor Novartis had any implication in any stage of this study (study's conception and design, analysis and interpretation of data, drafting, or revising the manuscript). |
| Aro 2018           | This investigator-initiated academic investigation had a shared funding from the Academy of Finland (contract #117058), Novartis Inc. (contract CDJN608 FI01), and Turku University Hospital (government-sponsored research contract #13705). The femoral component was RSA-marked by Stryker Inc., and the hospital purchased the implants without extra charge. The sponsors | The authors declare that they have no conflict of interest                                                                                                                                                                                                                                                                                                                                                                                                                                                                                                                                                                                                                                                            |

| <b>Reference</b>    | <b>Funding sources / Sources of support</b>                                      | <b>Conflict of interest</b>                                                                                                                                                                                                                                                                                                                                                                                                                                                                                                                                                                                                                                                                                                                                                                                                                                                                                                                                                                                                                                                                                                                                                                                                                                                                                                                                                                                                                                                                                                                                                                                                                                                                                                                                                                                                      |
|---------------------|----------------------------------------------------------------------------------|----------------------------------------------------------------------------------------------------------------------------------------------------------------------------------------------------------------------------------------------------------------------------------------------------------------------------------------------------------------------------------------------------------------------------------------------------------------------------------------------------------------------------------------------------------------------------------------------------------------------------------------------------------------------------------------------------------------------------------------------------------------------------------------------------------------------------------------------------------------------------------------------------------------------------------------------------------------------------------------------------------------------------------------------------------------------------------------------------------------------------------------------------------------------------------------------------------------------------------------------------------------------------------------------------------------------------------------------------------------------------------------------------------------------------------------------------------------------------------------------------------------------------------------------------------------------------------------------------------------------------------------------------------------------------------------------------------------------------------------------------------------------------------------------------------------------------------|
| Author Year         | (as stated in the manuscript)                                                    | (as stated in the manuscript)                                                                                                                                                                                                                                                                                                                                                                                                                                                                                                                                                                                                                                                                                                                                                                                                                                                                                                                                                                                                                                                                                                                                                                                                                                                                                                                                                                                                                                                                                                                                                                                                                                                                                                                                                                                                    |
|                     | had no further role in the study.                                                |                                                                                                                                                                                                                                                                                                                                                                                                                                                                                                                                                                                                                                                                                                                                                                                                                                                                                                                                                                                                                                                                                                                                                                                                                                                                                                                                                                                                                                                                                                                                                                                                                                                                                                                                                                                                                                  |
| Ascott Evans 2003   | This study was funded by Merck & Co, Inc, which markets alendronate.             | Ms Vandormael and Drs Stuch and Melton are employees of Merck & Co, Inc and own stock in the company.                                                                                                                                                                                                                                                                                                                                                                                                                                                                                                                                                                                                                                                                                                                                                                                                                                                                                                                                                                                                                                                                                                                                                                                                                                                                                                                                                                                                                                                                                                                                                                                                                                                                                                                            |
| Barrett-Connor 2006 | Supported by Eli Lilly, Indianapolis.                                            | Dr. Barrett-Connor reports having received salary support from Eli Lilly for serving as principal investigator and as an investigator at a clinical site for the RUTH trial; having served on paid advisory boards for Merck, Eli Lilly, Procter & Gamble, and Amgen; and having received grant support from Amgen. Dr. Mosca reports having received consulting fees from Eli Lilly and Organon. Dr. Collins reports having received consulting fees from Eli Lilly, Berlex, Merck, Pantarhei, and Pfizer; having received lecture fees from Berlex, Merck, Pfizer, Novo Nordisk, and Organon; and having received grant support from Eli Lilly, Organon, and Merck. Dr. Grady reports having received salary support, by means of contracts with the University of California, San Francisco, from Berlex, Eli Lilly, Merck, Pfizer, and WyethAyerst Research and consulting fees for chairing a data and safety monitoring board at Organon. Dr. Kornitzer reports having received grant support and lecture fees from Eli Lilly, Merck, Bristol-Meyers Squibb, Sandoz, and AstraZeneca. Dr. Wenger reports having received salary support from Eli Lilly for serving as coprincipal investigator and as principal investigator at a clinical site for the RUTH trial; having received consulting fees from Eli Lilly, CV Therapeutics, NitroMed, Schering-Plough, and the Leadership Council for Improving Cardiovascular Care; having received speaker's fees from Pfizer, Novartis, Merck, Eli Lilly, and NitroMed; and having received research grants or contracts or having served on trial steering committees for Eli Lilly, AstraZeneca, and Pfizer. Dr. Geiger and Ms. McNabb are full-time employees and stockholders of Eli Lilly. No other potential conflict of interest relevant to this article was reported. |
| Bell 2002           | Not stated.                                                                      | Not stated.                                                                                                                                                                                                                                                                                                                                                                                                                                                                                                                                                                                                                                                                                                                                                                                                                                                                                                                                                                                                                                                                                                                                                                                                                                                                                                                                                                                                                                                                                                                                                                                                                                                                                                                                                                                                                      |
| Bock 2012           | This study was supported by an unrestricted research grant from Roche Pharma AG. | Dieter Felsenberg has acted as a consultant and speaker for Roche, Novartis, Procter and Gamble and MSD but has not received royalties from the companies. Oliver Bock has acted as a speaker for the same companies. Other research studies of the Center for Muscle and Bone Research have been supported financially by Roche, Novartis, Procter and Gamble and MSD. Peter Martus received an institutional grant from Roche. All other authors have no conflicts of interest.                                                                                                                                                                                                                                                                                                                                                                                                                                                                                                                                                                                                                                                                                                                                                                                                                                                                                                                                                                                                                                                                                                                                                                                                                                                                                                                                                |
| Body 2002           | This work was supported by a grant from Eli Lilly and Co. (India- napolis, IN).  | Not stated.                                                                                                                                                                                                                                                                                                                                                                                                                                                                                                                                                                                                                                                                                                                                                                                                                                                                                                                                                                                                                                                                                                                                                                                                                                                                                                                                                                                                                                                                                                                                                                                                                                                                                                                                                                                                                      |

| <b>Reference</b> | <b>Funding sources / Sources of support</b>                         | <b>Conflict of interest</b>                                                                                                                                                                                                                                                                                                                                                                                                                                                                                                                                                                                                                                                                                                                                                                                                                                                                                                                                                                                                                                                                                                                                                                                                                                                                                                                                                                                                                                                                                                                                                                                                                                                                                                                                                                                                                                                                                                              |
|------------------|---------------------------------------------------------------------|------------------------------------------------------------------------------------------------------------------------------------------------------------------------------------------------------------------------------------------------------------------------------------------------------------------------------------------------------------------------------------------------------------------------------------------------------------------------------------------------------------------------------------------------------------------------------------------------------------------------------------------------------------------------------------------------------------------------------------------------------------------------------------------------------------------------------------------------------------------------------------------------------------------------------------------------------------------------------------------------------------------------------------------------------------------------------------------------------------------------------------------------------------------------------------------------------------------------------------------------------------------------------------------------------------------------------------------------------------------------------------------------------------------------------------------------------------------------------------------------------------------------------------------------------------------------------------------------------------------------------------------------------------------------------------------------------------------------------------------------------------------------------------------------------------------------------------------------------------------------------------------------------------------------------------------|
| Author Year      | (as stated in the manuscript)                                       | (as stated in the manuscript)                                                                                                                                                                                                                                                                                                                                                                                                                                                                                                                                                                                                                                                                                                                                                                                                                                                                                                                                                                                                                                                                                                                                                                                                                                                                                                                                                                                                                                                                                                                                                                                                                                                                                                                                                                                                                                                                                                            |
| Bone 1997        | This work was supported by Merck Research Laboratories.             | Not stated.                                                                                                                                                                                                                                                                                                                                                                                                                                                                                                                                                                                                                                                                                                                                                                                                                                                                                                                                                                                                                                                                                                                                                                                                                                                                                                                                                                                                                                                                                                                                                                                                                                                                                                                                                                                                                                                                                                                              |
| Bone 2000        | This work was supported by grants from Merck Research Laboratories. | Not stated.                                                                                                                                                                                                                                                                                                                                                                                                                                                                                                                                                                                                                                                                                                                                                                                                                                                                                                                                                                                                                                                                                                                                                                                                                                                                                                                                                                                                                                                                                                                                                                                                                                                                                                                                                                                                                                                                                                                              |
| Bone 2008        | This work was supported by Amgen Inc.                               | H.G.B. is an investigator, consultant, and/or speaker for Amgen Inc., Osteologix, Nordic Bioscience, Merck, Zelos, Pfizer, Eli Lilly, GSK/Roche, NPS Pharmaceuticals, and Novartis. M.A.B. is a consultant and/or speaker for Amgen Inc., Roche, GSK, and Eli Lilly. C.K.Y. is an investigator for Amgen Inc. and an advisory board member for Amgen Canada, Novartis, Servier, and Wyeth. D.L.K. is an adviser and speaker and/or has received research grants from Merck, Eli Lilly, Novartis, Takeda, Wyeth, Amgen Inc., Zelos, Pfizer, and Servier. H.W., Y.L., and J.S.M. are employed by Amgen Inc.                                                                                                                                                                                                                                                                                                                                                                                                                                                                                                                                                                                                                                                                                                                                                                                                                                                                                                                                                                                                                                                                                                                                                                                                                                                                                                                                |
| Brown 2009       | This study was supported by Amgen (Thousand Oaks, CA, USA).         | Dr Brown is an investigator for Amgen and has served as a consultant for and/or received honoraria or research funding from Abbott, Amgen Arthrolab, Bristol Myers Squibb, Eli Lilly, Genizon, GlaxoSmithKline, Merck Frosst, Nicox, Novartis, Pfizer, Procter & Gamble, Roche, Sanofi-Aventis, Servier, Roche, Wyeth, and Zelos. Dr Prince is an investigator for Amgen and has received honoraria or research funding and/or served as a consultant for Eli Lilly, Merck, Novartis, and Servier. Dr Deal has served as a consultant for, on the speakers bureau of, and/or received research funding or consulting fees from Amgen, Eli Lilly, GlaxoSmithKline, Novartis, and Procter & Gamble. Dr Recker is an investisultant for, on the speakers bureau of, and/or received research funding or consulting fees from Amgen, Eli Lilly, GlaxoSmithKline, Novartis, and Procter & Gamble. Dr Recker is an investigator for Amgen and has served as a consultant for and/or received honoraria from Allelix, Amgen, Eli Lilly, GlaxoSmithKline, Merck, Novartis, NPS, Procter & Gamble, Roche, and Wyeth. Dr Kiel has received honoraria and/or research funding from Amgen, Hologic, Merck, Novartis, and Pfizer and has served as a consultant or on the speakers bureau for Amgen, Eli Lilly, GSK, Merck, Novartis, Procter & Gamble, Roche, and Wyeth. Dr Alvaro-Gracia is an investigator for Amgen. Dr de Gregorio has received research grants from Amgen, Merck, and Roche. Dr Hadji is an investigator for Amgen. Dr Hofbauer is an investigator for Amgen. Drs Wang, Austin, Wagman, Newmark, Cesar Libanati, and Javier San Martin are employees and shareholders of Amgen. Dr Bone is an investigator for Amgen, Eli Lilly, Merck, Novartis, Pfizer, and Zelos; has served as a consultant for Amgen, Merck, Nordic Bioscience, Osteologix, Pfizer, and Zelos; and has received speaker honoraria from Merck and Novartis. |
| Brown 2021       | The study was funded by Amgen Inc., Astellas                        | Jacques P. Brown has received research support from Mereo BioPharma, Radius Health, and Servier; has served as a consul-tant for Amgen and Servier; and has served on speakers' bureaus for Amgen.                                                                                                                                                                                                                                                                                                                                                                                                                                                                                                                                                                                                                                                                                                                                                                                                                                                                                                                                                                                                                                                                                                                                                                                                                                                                                                                                                                                                                                                                                                                                                                                                                                                                                                                                       |

| <b>Reference</b> | <b>Funding sources / Sources of support</b>                                                        | <b>Conflict of interest</b>                                                                                                                                                                                                                                                                                                                                                                                                                                                                                                                                                                                                                                                                                                                                                                                                                                                                                                                                                                                                                                                                                                                                                                                                                                                                       |
|------------------|----------------------------------------------------------------------------------------------------|---------------------------------------------------------------------------------------------------------------------------------------------------------------------------------------------------------------------------------------------------------------------------------------------------------------------------------------------------------------------------------------------------------------------------------------------------------------------------------------------------------------------------------------------------------------------------------------------------------------------------------------------------------------------------------------------------------------------------------------------------------------------------------------------------------------------------------------------------------------------------------------------------------------------------------------------------------------------------------------------------------------------------------------------------------------------------------------------------------------------------------------------------------------------------------------------------------------------------------------------------------------------------------------------------|
| Author Year      | (as stated in the manuscript)                                                                      | (as stated in the manuscript)                                                                                                                                                                                                                                                                                                                                                                                                                                                                                                                                                                                                                                                                                                                                                                                                                                                                                                                                                                                                                                                                                                                                                                                                                                                                     |
|                  | Pharma, Inc., and UCB Pharma.                                                                      | Klaus Engelke is a part time employee of BioClinica. Tony M. Keaveny has served as a consultant for Amgen, O.N. Diagnostics, AgNovos Healthcare, and Bone Health Technologies and owns equity in O.N. Diagnostics. Arkadi Chines, Zhenxun Wang, and Mary K. Oates are employees of Amgen and own stock in Amgen. Roland Chapurlat has received research support from Amgen, UCB Pharma, Chugai, and MSD, and has served as a consultant for Amgen, UCB Pharma, Pfizer, PKMed, Sanofi, Arrow, and BMS. A. Joseph Foldes has nothing to disclose. Xavier Nogues has served as a consultant for Amgen, Eli Lilly, and STADA, and has served on speakers' bureaus for Amgen, Eli Lilly, Italfarmaco, and FAES. Roberto Civitelli has received research support from Mereo BioPharma. Tobias De Villiers has served as a consultant for Eli Lilly and has served on speakers' bureaus for Abbott, Pfizer, and Adcock Ingram. Fabio Massari has nothing to disclose. Cristiano A.F. Zerbinì has received research support from Amgen, Eli Lilly, Pfizer, and Sanofi. Christopher Recknor has received grants/research support from Amgen, CytoDyn, Eli Lilly, and Roche, and has served as a consultant for Amgen and CytoDyn. Cesar Libanati is an employee of UCB Pharma and owns stock in UCB Pharma |
| Clemmesen 1997   | Not stated.                                                                                        | Not stated.                                                                                                                                                                                                                                                                                                                                                                                                                                                                                                                                                                                                                                                                                                                                                                                                                                                                                                                                                                                                                                                                                                                                                                                                                                                                                       |
| Cosman 2001      | This work was supported in part by National Institutes of Health (NIH) grants AR39191 and DK46381. | Not stated.                                                                                                                                                                                                                                                                                                                                                                                                                                                                                                                                                                                                                                                                                                                                                                                                                                                                                                                                                                                                                                                                                                                                                                                                                                                                                       |
| Cosman 2005      | Supported in part by a grant (AR39191) from the National Institutes of Health.                     | Dr. Cosman reports having received speakers' fees from Eli Lilly, Merck, Roche-GlaxoSmithKline, and Novartis; advisory or consulting fees from Eli Lilly, Merck, Novartis, Pfizer, NPS, and RocheGlaxoSmithKline; and grants from Novartis, Merck, RocheGlaxoSmithKline, and Eli Lilly. Dr. Lindsay reports having received speakers' fees from Procter & Gamble, Aventis, Eli Lilly, RocheGlaxoSmithKline, Novartis, and Wyeth; advisory or consulting fees from NPS, Wyeth, Procter & Gamble, Aventis, Pfizer, RocheGlaxoSmithKline, and Novartis; and grants from Wyeth, Aventis, Roche-GlaxoSmithKline, Novartis, and Ilex. Dr. Nieves reports having received speakers' fees from Merck. Dr. Luckey reports having received speakers' fees from Merck, Procter & Gamble, Aventis, and Eli Lilly; advisory or consulting fees from Wyeth, Roche, Procter & Gamble, and Merck; and grants from Amgen, Merck, Procter & Gamble, and Roche.                                                                                                                                                                                                                                                                                                                                                      |
| Cosman 2009      | Lilly Research Laboratories (Indianapolis, IN) funded the study.                                   | F.C. has received lecture fees, consulting fees and/or grant support from Eli Lilly and Company, Novartis, Merck, Zosano, Procter and Gamble, Amgen, and Pfizer. C.R. has received consulting fees from and is an advisor for Eli Lilly and Company, Roche, and Procter and Gamble and has received honoraria from Eli Lilly and Company, Roche, Procter and Gamble, GlaxoSmithKline, Merck, and Aventis. L.X., E.V.G., and J.H.K. are                                                                                                                                                                                                                                                                                                                                                                                                                                                                                                                                                                                                                                                                                                                                                                                                                                                            |

| Reference   | Funding sources / Sources of support                                                                                                               | Conflict of interest                                                                                                                                                                                                                                                                                                                                                                                                                                                                                                                                                                                                                                                                                                                                                                                                                                                                                                                                                                                                                                                                                                                                                                                                                                                                                                                                                                                                                                                                                                                                                                                                                                                                                                                                                                                                          |
|-------------|----------------------------------------------------------------------------------------------------------------------------------------------------|-------------------------------------------------------------------------------------------------------------------------------------------------------------------------------------------------------------------------------------------------------------------------------------------------------------------------------------------------------------------------------------------------------------------------------------------------------------------------------------------------------------------------------------------------------------------------------------------------------------------------------------------------------------------------------------------------------------------------------------------------------------------------------------------------------------------------------------------------------------------------------------------------------------------------------------------------------------------------------------------------------------------------------------------------------------------------------------------------------------------------------------------------------------------------------------------------------------------------------------------------------------------------------------------------------------------------------------------------------------------------------------------------------------------------------------------------------------------------------------------------------------------------------------------------------------------------------------------------------------------------------------------------------------------------------------------------------------------------------------------------------------------------------------------------------------------------------|
| Author Year | (as stated in the manuscript)                                                                                                                      | (as stated in the manuscript)                                                                                                                                                                                                                                                                                                                                                                                                                                                                                                                                                                                                                                                                                                                                                                                                                                                                                                                                                                                                                                                                                                                                                                                                                                                                                                                                                                                                                                                                                                                                                                                                                                                                                                                                                                                                 |
|             |                                                                                                                                                    | employees of Eli Lilly and Company. R.A.W. and K.F.M. have nothing to declare.                                                                                                                                                                                                                                                                                                                                                                                                                                                                                                                                                                                                                                                                                                                                                                                                                                                                                                                                                                                                                                                                                                                                                                                                                                                                                                                                                                                                                                                                                                                                                                                                                                                                                                                                                |
| Cosman 2011 | This study and editorial support for the development of this article were funded by Novartis Pharmaceuticals Corporation of East Hanover, NJ, USA. | FC consults for Amgen, Eli Lilly, Merck, and Novartis. EFE has been an employee of and owns stock in Novartis. CR receives research grants from Procter & Gamble; consults for Amgen, Eli Lilly, GlaxoSmithKline, Merck, Novartis, NPS, Roche, Procter & Gamble, and Zelos; and speaks for Aventis, Eli Lilly, GlaxoSmithKline, Merck, Procter & Gamble, and Roche. PDM receives research grants from and/or consults for Amgen, Eli Lilly, GlaxoSmithKline, Merck, Novartis, NPS, Procter & Gamble, Roche, and Sanofi-Aventis. NG has served on advisory boards for Amgen, Wyeth, and MSD. CK has received research grants from and consulted for Amgen, Novartis, and Servier. PP is an employee of and owns stock in Novartis. AR and HR are employees of Novartis. JAG is an employee of the Novartis Institute for BioMedical Research. CBR is an employee of and owns stock in Novartis. SB is senior clinical investigator of the Fund for Scientific Research, Flanders, Belgium (FWOVlaanderen) and receives research grants from Amgen, Eli Lilly, Novartis, Pfizer, Procter & Gamble, Sanofi-Aventis, and RocheGlaxoSmithKline and consults or speaks for Amgen, Eli Lilly, Merck, Novartis, Procter & Gamble, Sanofi-Aventis, and Servier.                                                                                                                                                                                                                                                                                                                                                                                                                                                                                                                                                                        |
| Cosman 2020 | The study was funded by Amgen Inc., Astellas, and UCB Pharma.                                                                                      | FC has received institutional grants and research support from Amgen and Eli Lilly; has served as a consultant for Amgen, Eli Lilly, Merck, Radius, and Tarsa/R-Pharm; has served on the speakers' bureaus for Amgen, Eli Lilly, and Radius; and has served on advisory boards for Amgen, Eli Lilly, Merck, and Radius. EML has received institutional research grants for his employer, New Mexico Clinical Research & Osteoporosis Center, from Radius, Amgen, Mereo, and Bindex; has received income for service on scientific advisory boards or consulting for Amgen, Radius, Alex-ion, Sandoz, and Samsung Bioepis and for service on speakers' bureaus for Radius and Alexion; has received project development funds for the University of New Mexico; has received royal-ties from UpToDate for sections on DXA, fracture risk assessment, and prevention of osteoporosis; and is a board member of the National Osteoporosis Foundation, International Society for Clinical Densitometry, and Osteoporosis Foundation of New Mexico. PRE has received grants/research support from Amgen and Eli Lilly; has served as a consultant for Amgen; and has received honoraria from Amgen and Theramex. EH has served as a consultant for AgNovos and has received other financial or material support (not specified) from Amgen and Eli Lilly. NN has served as a consultant for Amgen and Eli Lilly. TM has served as a consultant for Chugai, Teijin Pharma, Daiichi Sankyo, and Astellas-Amgen Biopharma; and has served on an advisory board for Amgen. DBC was an employee and stockholder of Amgen at the time of the study. MR and WY are employees and stockholders of Amgen. CL is an employee and stockholder of UCB Pharma. SF has received grants/research support from UCB Pharma and Merck, Sharp & Dohme |

| <b>Reference</b> | <b>Funding sources / Sources of support</b>                                | <b>Conflict of interest</b>                                                                                                                                                                                                                                                                                                                                                                                                                                                                                                                                                                                                                                                                                                                                                                                                                                                                                                                                                                                                                                                                                                                                                                                                                                                                                |
|------------------|----------------------------------------------------------------------------|------------------------------------------------------------------------------------------------------------------------------------------------------------------------------------------------------------------------------------------------------------------------------------------------------------------------------------------------------------------------------------------------------------------------------------------------------------------------------------------------------------------------------------------------------------------------------------------------------------------------------------------------------------------------------------------------------------------------------------------------------------------------------------------------------------------------------------------------------------------------------------------------------------------------------------------------------------------------------------------------------------------------------------------------------------------------------------------------------------------------------------------------------------------------------------------------------------------------------------------------------------------------------------------------------------|
| Author Year      | (as stated in the manuscript)                                              | (as stated in the manuscript)                                                                                                                                                                                                                                                                                                                                                                                                                                                                                                                                                                                                                                                                                                                                                                                                                                                                                                                                                                                                                                                                                                                                                                                                                                                                              |
|                  |                                                                            | and has served as a consul-tant for Amgen, UCB Pharma, Labatec, and AgNovos.                                                                                                                                                                                                                                                                                                                                                                                                                                                                                                                                                                                                                                                                                                                                                                                                                                                                                                                                                                                                                                                                                                                                                                                                                               |
| Downs Jr. 2000   | Funded and supported by Merck & Co., Inc. (West Point, PA).                | Development of the experimental design, selection of investigative sites, collection and analysis of the data were performed by Merck. Interpretation of the data and compilation of the manuscript was a joint effort between Merck personnel and non-Merck authors of the manuscript.                                                                                                                                                                                                                                                                                                                                                                                                                                                                                                                                                                                                                                                                                                                                                                                                                                                                                                                                                                                                                    |
| Dursun 2001      | Not stated.                                                                | Not stated.                                                                                                                                                                                                                                                                                                                                                                                                                                                                                                                                                                                                                                                                                                                                                                                                                                                                                                                                                                                                                                                                                                                                                                                                                                                                                                |
| Ensrud 2008      | This study was funded by Eli Lilly and Company, Indianapolis,IN, USA.      | Dr Ensrud received research grant support through contracts with the University of Minnesota from Eli Lilly and Company, Pfizer, Merck, Roche, Berlex, and Bionovo. Dr Stock is a full-time employee of Eli Lilly and Company. Dr Barrett-Connor received research grant support through contracts with the University of California–San Diego from Amgen, Merck, Organon, Envision Pharma, and Eli Lilly and Company. Dr Grady received research grant support through contracts with the University of California–San Francisco from Berlex, Bionovo, Eli Lilly and Company, and Pfizer and research and consulting fees for chairing a data and safety monitoring board at Organon. Dr Mosca received consulting fees from Pfeizer, Organon, Merck, Sheray Plough, Novartis, Wyeth, Amgen, and Eli Lilly and Company. Dr Khaw received consultant fees for endpoint adjudication from Eli Lilly and Company. Drs Zhao and Agnusdei are full-time employees of Eli Lilly and Company. Dr Cauley received research grant support through contracts with the University of Pittsburgh from Merck & Company, Pfizer Pharmaceuticals, Novartis Pharmaceuticals, and Eli Lilly and Company; honorarium from Merck & Company, Novartis, and Eli Lilly and Company, and speaker’s bureau for Merck and Company. |
| Fogelman 2000    | Supported by Procter & Gamble Pharmaceuticals and Aventis Pharmaceuticals. | Not stated.                                                                                                                                                                                                                                                                                                                                                                                                                                                                                                                                                                                                                                                                                                                                                                                                                                                                                                                                                                                                                                                                                                                                                                                                                                                                                                |
| Freemantle 2012  | The DAPS study was sponsored by Amgen Inc.                                 | N. Freemantle has received research grants from Amgen and has served as a consultant for Amgen, SanofiAventis, Pfizer, Wyeth, and Eli Lilly. S. Satram-Hoang has served as a consultant for Amgen. E. Tang, P. Kaur, D. Macarios, and S. Siddhanti are employees and shareholders of Amgen. J. Borenstein previously was employed by Amgen. D. Kendler has received grant or research support from Amgen, Merck, Eli Lilly, Novartis, Procter & Gamble, GlaxoSmithKline, Pfizer, Roche Biosante, and Wyeth and has served as an advisor for Amgen, Merck, Eli Lilly, Novartis, Wyeth, Nycomed, Procter & Gamble, and Pfizer.                                                                                                                                                                                                                                                                                                                                                                                                                                                                                                                                                                                                                                                                               |
| Galesanu 2018    | No information.                                                            | No information.                                                                                                                                                                                                                                                                                                                                                                                                                                                                                                                                                                                                                                                                                                                                                                                                                                                                                                                                                                                                                                                                                                                                                                                                                                                                                            |



| Reference         | Funding sources /<br>Sources of support                                                                                                                                                                                                                                                                                                                                                                                                                                                                                                                                                        | Conflict of interest                                                                                                                                                                                      |
|-------------------|------------------------------------------------------------------------------------------------------------------------------------------------------------------------------------------------------------------------------------------------------------------------------------------------------------------------------------------------------------------------------------------------------------------------------------------------------------------------------------------------------------------------------------------------------------------------------------------------|-----------------------------------------------------------------------------------------------------------------------------------------------------------------------------------------------------------|
| Author Year       | (as stated in the<br>manuscript)                                                                                                                                                                                                                                                                                                                                                                                                                                                                                                                                                               | (as stated in the manuscript)                                                                                                                                                                             |
| Greenspan<br>1998 | Ostex International and Metra Biosystems for their support of this study. Support was also provided by CDC Grant No. CC102550, National Institutes of Health Grant No. RR01032, Harvard-Thorndike General Clinical Research Center, Beth Israel Deaconess Medical Center, and Merck Research Laboratories, Rahway, NJ, U.S.A.                                                                                                                                                                                                                                                                  | Not stated.                                                                                                                                                                                               |
| Greenspan<br>2003 | The study was conducted at the Harvard-Thorndike General Clinical Research Center, Beth Israel Deaconess Medical Center, Boston, Mass. Support was provided by an NIH grant (R01 AG13069-04) awarded to Dr Greenspan and an NIH grant (M01-RR1032) awarded to the HarvardThorndike General Clinical Research Center, Beth Israel Deaconess Medical Center. Wyeth-Ayerst Laboratories (Philadelphia, Pa) provided the Premarin and Prempro, matching placebo, and Os-Cal Plus D, and Merck Research Laboratories (Rahway, NJ) provided the alendronate and matching placebo used in this study. | Dr Greenspan has had research support and has been on the speaker's bureau and a consultant for Merck Research Laboratories, Rahway, NJ. Dr Parker has been a consultant for Merck Research Laboratories. |

| <b>Reference</b> | <b>Funding sources / Sources of support</b>                                                                                                   | <b>Conflict of interest</b>                                                                                                                                                                                                                                                                                                                                                                                                                                                                                                                                                                                                                                                                                                                                                                                                                                                                                                                                                                                                                                                                                                                                                                                                                                                                                                                                                                                                                                                                                                              |
|------------------|-----------------------------------------------------------------------------------------------------------------------------------------------|------------------------------------------------------------------------------------------------------------------------------------------------------------------------------------------------------------------------------------------------------------------------------------------------------------------------------------------------------------------------------------------------------------------------------------------------------------------------------------------------------------------------------------------------------------------------------------------------------------------------------------------------------------------------------------------------------------------------------------------------------------------------------------------------------------------------------------------------------------------------------------------------------------------------------------------------------------------------------------------------------------------------------------------------------------------------------------------------------------------------------------------------------------------------------------------------------------------------------------------------------------------------------------------------------------------------------------------------------------------------------------------------------------------------------------------------------------------------------------------------------------------------------------------|
| Author Year      | (as stated in the manuscript)                                                                                                                 | (as stated in the manuscript)                                                                                                                                                                                                                                                                                                                                                                                                                                                                                                                                                                                                                                                                                                                                                                                                                                                                                                                                                                                                                                                                                                                                                                                                                                                                                                                                                                                                                                                                                                            |
| Grey 2009        | This work was supported by funding from the Health Research Council of New Zealand.                                                           | A.G., M.J.B., D.W., A.H., and G.G. have nothing to declare; I.R.R. has received research funding and speaker and consultancy fees from Novartis, Merck, Procter & Gamble, and Amgen.                                                                                                                                                                                                                                                                                                                                                                                                                                                                                                                                                                                                                                                                                                                                                                                                                                                                                                                                                                                                                                                                                                                                                                                                                                                                                                                                                     |
| Grey 2012        | Grant support was from the Health Research Council of New Zealand and the University of Auckland. The study drug was provided by Novartis.    | A.G., M.B., S.W., A.H., and G.G. have no conflict of interest to declare. I.R.R. has received research funding and speaker and consultancy fees from Novartis, Merck, Procter & Gamble, and Amgen.                                                                                                                                                                                                                                                                                                                                                                                                                                                                                                                                                                                                                                                                                                                                                                                                                                                                                                                                                                                                                                                                                                                                                                                                                                                                                                                                       |
| Hadji 2012       | This study was funded by Eli Lilly and Company.                                                                                               | P. Hadji was a recipient of a grant/research support from Eli Lilly and Company, Procter & Gamble; speakers bureau with Eli Lilly and Company (Lilly) and Procter & Gamble; advisory board membership of Lilly and Procter & Gamble; consulting fees from Lilly and Procter & Gamble; lecture fees from Lilly and Procter & Gamble; and speaker fees from Lilly and Procter & Gamble. J. Zanchetta received an advisory board membership of Lilly, Amgen, GlaxoSmithKline, Merck, Pfizer, and Servier and consulting fees from Lilly, Amgen, GlaxoSmithKline, Merck, Pfizer, and Servier. C. Recknor received an advisory board membership of Lilly, Zelos, Takeda, and Novartis; consulting fees from Lilly, Zelos, Takeda, and Novartis; and lecture fees from Amgen and Novartis. K. Saag was a recipient of a grant/research support from Lilly, Novartis, GlaxoSmithKline, Sanofi Aventis, and Procter & Gamble; speakers bureau with Novartis; and consulting fees from Lilly, Novartis, Merck, Procter & Gamble, Aventis, and Amgen. F. McKiernan received consulting fees from Lilly and Amgen. S. Silverman was a recipient of a grant/research support from Alliance for Better Bone Health, Lilly, Pfizer; speakers bureau with Amgen, Lilly, Pfizer, and Roche Pharmaceuticals; consulting fees from Amgen, Lilly, Novartis, Pfizer, Roche Pharmaceuticals, Roche Diagnostics, and Warner Chilcott. J. Alam, R. Burge, J. Krege, M. Lakshmanan, D. Masica, B. Mitlak, and J. Stock were shareholders and employees of Lilly. |
| Hooper 2005      | This study was supported by a grant from Procter & Gamble Pharmaceuticals, Cincinnati, Ohio and sanofi-aventis, Bridgewater, New Jersey, USA. | Dr Hooper has received honoraria and/or research funding from Aventis Pharma, Eli Lilly and Company, Merck, Sharp & Dohme, Novartis, Pfizer, Procter & Gamble, Roche, Sanofi and Wyeth. Dr Ebeling has received honoraria from Aventis and Eli Lilly and Company, and research funding from Procter & Gamble, Merck, Sharp & Dohme, Roche and Amgen. Dr Roberts has received consultancy fees and research funding from Aventis Pharma, Eli Lilly and Company, and Merck, Sharp & Dohme, and research funding from Procter & Gamble, Novartis, and Wyeth. Dr Graham has received consulting fees from Aventis Pharma and Merck, and research funding from Aventis Pharma, Procter & Gamble, Merck, Sharp & Dohme, Pfizer, Eli Lilly and Company, Sevier Laboratories, Novartis, and Amgen. Dr Nicholson has received honoraria and travel grants from Aventis Pharma, Merck, Sharp & Dohme Australia, and Eli                                                                                                                                                                                                                                                                                                                                                                                                                                                                                                                                                                                                                            |

| <b>Reference</b> | <b>Funding sources / Sources of support</b>            | <b>Conflict of interest</b>                                                                                                                                                                                                                                                                                                                                                                                                                                                                                                                                                                                                                                                                                                                                                                                                                                                                                                                                                                                                                                                                                                                                                                                                                                                                                                                                                                                                                                                                                                                                                                                                                                                                                                                                                                                                                                                                                                                                                                                         |
|------------------|--------------------------------------------------------|---------------------------------------------------------------------------------------------------------------------------------------------------------------------------------------------------------------------------------------------------------------------------------------------------------------------------------------------------------------------------------------------------------------------------------------------------------------------------------------------------------------------------------------------------------------------------------------------------------------------------------------------------------------------------------------------------------------------------------------------------------------------------------------------------------------------------------------------------------------------------------------------------------------------------------------------------------------------------------------------------------------------------------------------------------------------------------------------------------------------------------------------------------------------------------------------------------------------------------------------------------------------------------------------------------------------------------------------------------------------------------------------------------------------------------------------------------------------------------------------------------------------------------------------------------------------------------------------------------------------------------------------------------------------------------------------------------------------------------------------------------------------------------------------------------------------------------------------------------------------------------------------------------------------------------------------------------------------------------------------------------------------|
| Author Year      | (as stated in the manuscript)                          | (as stated in the manuscript)                                                                                                                                                                                                                                                                                                                                                                                                                                                                                                                                                                                                                                                                                                                                                                                                                                                                                                                                                                                                                                                                                                                                                                                                                                                                                                                                                                                                                                                                                                                                                                                                                                                                                                                                                                                                                                                                                                                                                                                       |
|                  |                                                        | Lilly Australia. Dr D’Emden has no potential conflicts of interest. Drs Ernst and Wenderoth are employees of Procter & Gamble Pharmaceuticals.                                                                                                                                                                                                                                                                                                                                                                                                                                                                                                                                                                                                                                                                                                                                                                                                                                                                                                                                                                                                                                                                                                                                                                                                                                                                                                                                                                                                                                                                                                                                                                                                                                                                                                                                                                                                                                                                      |
| Hosking 1998     | Supported by a grant from Merck Research Laboratories. | Not stated.                                                                                                                                                                                                                                                                                                                                                                                                                                                                                                                                                                                                                                                                                                                                                                                                                                                                                                                                                                                                                                                                                                                                                                                                                                                                                                                                                                                                                                                                                                                                                                                                                                                                                                                                                                                                                                                                                                                                                                                                         |
| Hosking 2003     | This project was funded by Merck & Co., Inc.           | Not stated.                                                                                                                                                                                                                                                                                                                                                                                                                                                                                                                                                                                                                                                                                                                                                                                                                                                                                                                                                                                                                                                                                                                                                                                                                                                                                                                                                                                                                                                                                                                                                                                                                                                                                                                                                                                                                                                                                                                                                                                                         |
| Kendler 2010     | Amgen Inc., sponsored this study.                      | Dr. Kendler is an investigator for Merck, Amgen, Eli Lilly, Novartis, Takeda, GlaxoSmithKline, Pfizer, Servier, Biosante, and Wyeth and has served as a speaker, consultant, or advisor for and/or received honoraria from Merck, Amgen, Eli Lilly, Novartis, Servier, Nycomed, and Wyeth. Professor Roux is an investigator for Amgen and has served as a consultant for and/or received honoraria or research funding from Amgen, Roche, Merck Sharp & Dohme, Alliance for Better Bone Health, Novartis, Servier, Lilly, and Wyeth. Professor Benhamou is an investigator for Amgen and has served as a consultant and/or investigator for Amgen, Lilly, Merck Sharp & Dohme, Novartis, Alliance for Better Bone Health, Pierre Fabre, Servier, and Wyeth. Dr. Brown is an investigator for Amgen and has served as a consultant for and/or received honoraria or research funding from Abbott, Amgen, Arthrolab, Bristol Myers Squibb, Eli Lilly, Genizon, GlaxoSmithKline, Merck Frosst, Nicox, Novartis, Pfizer, Procter & Gamble, Roche, Sanofi-aventis, Servier, Wyeth, and Zelos. Dr. Lillestol is an investigator for Amgen and reports financial disclosures for Alexion, Amgen, Astra/Zeneca, Bausch & Lomb, BioSante, Boehringer Ingelheim, Bristol Myers Squibb, CombinatoRx, Covance, Daiichi Sankyo, DP Clinical, Endo Pharmaceuticals, Forest, GlaxoSmithKline, Hisamitsu, i3 Research, Lilly, Novartis, Novo Nordisk, NPS Allelix, NPS Pharmaceuticals, Otsuka, Pfizer, PPD, Quintiles, Roche, Sanofi-Aventis, Schering-Plough, Sepacor, Smith Kline Beecham, Takeda, Viropharma, and Wyeth. Dr. Siddhanti, Ms. Man, and Dr. San Martin are full-time employees of Amgen Inc., and may own stock or stock options in Amgen Inc. Dr. Bone is an investigator for Amgen, Eli Lilly, Merck, Nordic Biosciences, Takeda, and Zelos; has served as a consultant for Amgen, Merck, Nordic Bioscience, Osteologix, Pfizer, Takeda, and Zelos; and has received speaker honoraria from Merck and Novartis. |
| Kendler 2020     | This study was sponsored by Amgen Inc.                 | D.K. has grant/research support from Amgen, AstraZeneca, and Eli Lilly and consultant/speakers’ bureau/advisory activities with Amgen, Pfizer, and Eli Lilly. P.C. has grant/research support from CONACYT (Mexico) Fondos Federales (Mexico); consultant/speakers’ bureau/advisory activities with Amgen, Eli Lilly, and Pfizer; board membership with IOF and National University of Mexico UNAM; and patent licensing for 613227. P.R.E. has grant/research support from Amgen and Eli Lilly and consultant/speakers’ bureau/advisory activities with Amgen, Alexion, and Eli Lilly. M.M. has grant/research support from Amgen and                                                                                                                                                                                                                                                                                                                                                                                                                                                                                                                                                                                                                                                                                                                                                                                                                                                                                                                                                                                                                                                                                                                                                                                                                                                                                                                                                                              |

| Reference        | Funding sources /<br>Sources of support               | Conflict of interest                                                                                                                                                                                                                                                                                                                                                                                                                                                                                                                                                                                                                                                                                                                                                                                                                                                                                                                                                                                                                                                                                                                                                                                                                                                                                                                                                                                                                                                                                                                                                                                                                                                                                                                                                                                                                                                                                                                                                                                                                                                                                                                                                                                                                                                                                                                                                                                                                                                                                                                                                                                                                                                                                                                           |
|------------------|-------------------------------------------------------|------------------------------------------------------------------------------------------------------------------------------------------------------------------------------------------------------------------------------------------------------------------------------------------------------------------------------------------------------------------------------------------------------------------------------------------------------------------------------------------------------------------------------------------------------------------------------------------------------------------------------------------------------------------------------------------------------------------------------------------------------------------------------------------------------------------------------------------------------------------------------------------------------------------------------------------------------------------------------------------------------------------------------------------------------------------------------------------------------------------------------------------------------------------------------------------------------------------------------------------------------------------------------------------------------------------------------------------------------------------------------------------------------------------------------------------------------------------------------------------------------------------------------------------------------------------------------------------------------------------------------------------------------------------------------------------------------------------------------------------------------------------------------------------------------------------------------------------------------------------------------------------------------------------------------------------------------------------------------------------------------------------------------------------------------------------------------------------------------------------------------------------------------------------------------------------------------------------------------------------------------------------------------------------------------------------------------------------------------------------------------------------------------------------------------------------------------------------------------------------------------------------------------------------------------------------------------------------------------------------------------------------------------------------------------------------------------------------------------------------------|
| Author Year      | (as stated in the<br>manuscript)                      | (as stated in the manuscript)                                                                                                                                                                                                                                                                                                                                                                                                                                                                                                                                                                                                                                                                                                                                                                                                                                                                                                                                                                                                                                                                                                                                                                                                                                                                                                                                                                                                                                                                                                                                                                                                                                                                                                                                                                                                                                                                                                                                                                                                                                                                                                                                                                                                                                                                                                                                                                                                                                                                                                                                                                                                                                                                                                                  |
| Langdahl<br>2017 | Amgen, Astellas, and<br>UCB Pharma.                   | <p>consultant/ speakers' bureau/advisory activities with Amgen and Radius Health. Y.R. has grant/research support from the Korean Ministry of Health and Welfare, Korean Ministry of Science and ICT and consultant/speakers' bureau/advisory activities with Amgen. A.C., S.H., and R.K.S. are company employees and have stock ownership or royalties with Amgen.</p> <p>BLL reports fees (to her institution), during the conduct of the study; she reports personal fees from Amgen, Eli Lilly, Merck, and UCB; non-financial support from Eli Lilly and Orkla Health; and grants and non-financial support from Novo Nordisk, outside the submitted work. CL is an employee of UCB Pharma and reports UCB Pharma stock and stock options. DBC, NSD, JMad, and AG are employees of Amgen and report Amgen stock or stock options. JPB reports research grants from Amgen (paid to institution), during the conduct of the study; and grants (paid to institution) and personal fees from Amgen and Eli Lilly and personal fees from Merck and Radius, outside of the submitted work. KE reports personal fees from Amgen Bone Academy Germany, outside the submitted work. HKG reports consulting fees from Amgen, Lilly, Merck, Novartis, Pfizer, Janssen, Daiichi, Medtronic, AgNovos Healthcare, BioMarin, Clementia, and BioClinica, outside the submitted work. SG reports grants, personal fees, and non-financial support from Amgen, during the conduct of the study; and grants from MSD, Novartis, UCB, and Eli Lilly, outside the submitted work. EJ-G reports personal fees for consulting from UCB Pharma, personal fees for consulting and speaking from Eli Lilly, and personal fees and other fees for clinical trials, consulting, and speaking from Merck and Amgen, outside the submitted work. TMK reports consulting fees from and equity ownership in ON Diagnostics and consulting fees from Amgen and AgNovos Healthcare, outside the submitted work. In addition, he has a patent US Application 11/241,627 pending to UC Berkeley, a patent US Application 14/311,242 pending to ON Diagnostics, and a patent US Application 14/455,867 pending to ON Diagnostics, and he serves as consulting Chief Science Officer for ON Diagnostics, which was paid to perform some of the technical services for this study. DK reports research grants and honoraria from Amgen and Eli Lilly, research grants from AstraZeneca and Astellas, and consulting fees from Merck, during the conduct of the study. PL reports personal fees from Amgen, Merck, Sanofi, Fresenius-Kabi, and Servier, outside the submitted work. JFM reports research funding from Amgen. All other authors declare no competing interests.</p> |
| Lewiecki 2007    | This study was<br>supported by a grant<br>from Amgen. | <p>Dr Lewiecki has received grant/research support from Merck, Eli Lilly, Novartis, Sanofi-Aventis, Amgen, Pfizer, Wyeth-Ayerst, Roche, GlaxoSmithKline, and Procter &amp; Gamble. He participates as a consultant and/or as part of an advisory board, speakers' bureau, or sponsored speaking event for Merck, Eli Lilly, Novartis, Procter &amp; Gamble, Sanofi-Aventis, Roche, GlaxoSmithKline, Wyeth-Ayerst, Servier, and Amgen. He is a direct stock shareholder of General Electric and Procter &amp; Gamble. Dr Miller has received scientific grants from Procter &amp; Gamble, Aventis, Roche, Eli Lilly, Pharmacia, Merck &amp; Co., Novartis, Pfizer, and Amgen. He</p>                                                                                                                                                                                                                                                                                                                                                                                                                                                                                                                                                                                                                                                                                                                                                                                                                                                                                                                                                                                                                                                                                                                                                                                                                                                                                                                                                                                                                                                                                                                                                                                                                                                                                                                                                                                                                                                                                                                                                                                                                                                            |

| <b>Reference</b>   | <b>Funding sources / Sources of support</b>                                                                                                          | <b>Conflict of interest</b>                                                                                                                                                                                                                                                                                                                                                                                                                                                                                                                                                                                                                                                                                                                                                                                                                                                                                                                                                                                                                   |
|--------------------|------------------------------------------------------------------------------------------------------------------------------------------------------|-----------------------------------------------------------------------------------------------------------------------------------------------------------------------------------------------------------------------------------------------------------------------------------------------------------------------------------------------------------------------------------------------------------------------------------------------------------------------------------------------------------------------------------------------------------------------------------------------------------------------------------------------------------------------------------------------------------------------------------------------------------------------------------------------------------------------------------------------------------------------------------------------------------------------------------------------------------------------------------------------------------------------------------------------|
| Author Year        | (as stated in the manuscript)                                                                                                                        | (as stated in the manuscript)                                                                                                                                                                                                                                                                                                                                                                                                                                                                                                                                                                                                                                                                                                                                                                                                                                                                                                                                                                                                                 |
|                    |                                                                                                                                                      | is a consultant and/or on speaker boards or advisory boards for Procter & Gamble, Aventis, Merck & Co., Eli Lilly, Amgen, NPS, Novartis, Roche, and GlaxoSmithKline. Dr McClung has received research grants and/or consulting fees from Amgen, Eli Lilly, Merck, Novartis, Procter & Gamble, Roche, Sanofi-Aventis, and Wyeth. Dr Cohen has been a clinical investigator and research consultant for Genentech, Biogen-IDEC, Merck, Sanofi-Aventis, Procter & Gamble, Pfizer, Centocor, Amgen, Scios, Bristol Myers Squibb, and Wyeth-Ayerst. Dr Bolognese is a speaker for Merck, Procter & Gamble, GlaxoSmithKline, Pfizer, Wyeth, Roche, and AstraZeneca. He is a clinical investigator for Merck, Pfizer, Roche, GlaxoSmithKline, Procter & Gamble, AstraZeneca, Amgen, and Abbot Pharmaceuticals. Drs Liu, Wang, and Siddhanti are fulltime employees of Amgen and own stock in Amgen. At the time the study was conducted, Dr Fitzpatrick was a full-time employee of Amgen; she is currently a full-time employee of GlaxoSmithKline. |
| Lindsay 1997       | This study was supported by PHS grants NIAMS AR39191 and by the National Institute of Diabetes, Digestive, and Kidney Diseases (DK42892 and DK4631). | Not stated.                                                                                                                                                                                                                                                                                                                                                                                                                                                                                                                                                                                                                                                                                                                                                                                                                                                                                                                                                                                                                                   |
| Luckey 2004        | Funding provided by Merck & Co., Inc., West Point, PA.                                                                                               | Not stated.                                                                                                                                                                                                                                                                                                                                                                                                                                                                                                                                                                                                                                                                                                                                                                                                                                                                                                                                                                                                                                   |
| Lufkin 1998        | This work was supported by a grant from Eli Lilly and Company.                                                                                       | Not stated.                                                                                                                                                                                                                                                                                                                                                                                                                                                                                                                                                                                                                                                                                                                                                                                                                                                                                                                                                                                                                                   |
| Malouf-Sierra 2017 | The study was funded by Eli Lilly and Company (ClinicalTrials.gov Identifier: NCT00887354).                                                          | Pedro A. García-Hernández, Umberto Tarantino, Costantino Corradini, Lars Boris, Eric Lespessailles, Kyriakos Papavasiliou: None. Jorge Malouf-Serra: Speaker and consultation fees from: Amgen, Lilly, Gruenthal, Mundipharma, Esteve, FAES Pharma. Soren Overgaard: Research grants: Biomet, DePuy, Protosekompagniet, Lilly. Frede Frigagen: Speaker fees: Lilly, Research grants: Lilly, Takeda, Amgen. Per Aspenberg: Research grants from Eli Lilly. José R. Caeiro: Speaker and Consultant fees from Amgen, Lilly. Jan J. Stepan: Speaker fees: Lilly, Research grants: Lilly. Helmut Petto: Employee, Lilly. Fernando Marin: Employee, Lilly.                                                                                                                                                                                                                                                                                                                                                                                          |
| Masud 2009         | The study was funded by Procter and Gamble                                                                                                           | TM: has received financial support to attend conferences and for research from the following companies: Merck, Procter & Gamble, Roche, Novartis, Shire, Servier, Strackan; he has also sat in Advisory Board meetings for the above mentioned companies. MM: has received                                                                                                                                                                                                                                                                                                                                                                                                                                                                                                                                                                                                                                                                                                                                                                    |

| <b>Reference</b> | <b>Funding sources / Sources of support</b>                                                                    | <b>Conflict of interest</b>                                                                                                                                                                                                                                                                                                                                                                                                                                                                                                                                                                                                                                                                                                                                                                                                                                                                                                                                                                                                                                                                                                                                                                                                                                                                                                                                                                                                                                                                                                                                                                                                                                                                                                                                                                                                                                              |
|------------------|----------------------------------------------------------------------------------------------------------------|--------------------------------------------------------------------------------------------------------------------------------------------------------------------------------------------------------------------------------------------------------------------------------------------------------------------------------------------------------------------------------------------------------------------------------------------------------------------------------------------------------------------------------------------------------------------------------------------------------------------------------------------------------------------------------------------------------------------------------------------------------------------------------------------------------------------------------------------------------------------------------------------------------------------------------------------------------------------------------------------------------------------------------------------------------------------------------------------------------------------------------------------------------------------------------------------------------------------------------------------------------------------------------------------------------------------------------------------------------------------------------------------------------------------------------------------------------------------------------------------------------------------------------------------------------------------------------------------------------------------------------------------------------------------------------------------------------------------------------------------------------------------------------------------------------------------------------------------------------------------------|
| Author Year      | (as stated in the manuscript)                                                                                  | (as stated in the manuscript)                                                                                                                                                                                                                                                                                                                                                                                                                                                                                                                                                                                                                                                                                                                                                                                                                                                                                                                                                                                                                                                                                                                                                                                                                                                                                                                                                                                                                                                                                                                                                                                                                                                                                                                                                                                                                                            |
|                  | Pharmaceuticals and sanofi-aventis.                                                                            | research grants and/or consulting fees from Amgen, Lilly, Merck, Novartis, Procter & Gamble and sanofi-aventis. PG: has received research grants and/or consulting fees from Amgen, Lilly, Merck, Roche, Servier, Novartis, Procter & Gamble, sanofi-aventis, Wyeth, Schering-Plough and Abbott                                                                                                                                                                                                                                                                                                                                                                                                                                                                                                                                                                                                                                                                                                                                                                                                                                                                                                                                                                                                                                                                                                                                                                                                                                                                                                                                                                                                                                                                                                                                                                          |
| McClung 2001     | Supported by grants from Procter & Gamble Pharmaceuticals (Cincinnati) and Aventis Pharma (Bridgewater, N.J.). | The authors have received research grants from or have served as consultants to or members of speakers' bureaus for Procter & Gamble, Aventis Pharma, and other companies that make products used in the treatment of osteoporosis.                                                                                                                                                                                                                                                                                                                                                                                                                                                                                                                                                                                                                                                                                                                                                                                                                                                                                                                                                                                                                                                                                                                                                                                                                                                                                                                                                                                                                                                                                                                                                                                                                                      |
| McClung 2005     | This research was supported by Eli Lilly and Company.                                                          | Drs McClung and Miller received research grants from Eli Lilly and Company and from Merck and Company, Inc, West Point, Pa. In addition, Dr Miller has served as a paid consultant to Eli Lilly and Company and to Merck and Company, Inc. Drs Civitelli and Bandeira have received research grants from and served as paid consultants to Eli Lilly and Company. In addition, Dr Civitelli owns stock in Eli Lilly and Company. Dr Omizo has served as a paid consultant to Eli Lilly and Company.                                                                                                                                                                                                                                                                                                                                                                                                                                                                                                                                                                                                                                                                                                                                                                                                                                                                                                                                                                                                                                                                                                                                                                                                                                                                                                                                                                      |
| McClung 2006     | Supported by Amgen.                                                                                            | Dr. McClung reports having served as a consultant to Amgen, Eli Lilly, Merck, Novartis, NPS Pharmaceuticals, Procter & Gamble, Roche, Sanofi-Aventis, and Wyeth and having received grant support from Amgen, Eli Lilly, Merck, Novartis, Organon, Pfizer, Roche, and Sanofi-Aventis. Dr. Lewiecki reports having served as a consultant to Merck, Procter & Gamble, and Eli Lilly; having received lecture fees from Procter & Gamble; and having received grant support from Amgen. Dr. Cohen reports having served as a consultant to Amgen, Abbott, and Genentech; having equity interests in Merck and Pfizer; and having received lecture fees from Abbott, Genentech, and Amgen. Dr. Cohen is medical director of Radiant Research, Dallas, which receives grant support for clinical trials. Dr. Bolognese reports having received lecture fees from Eli Lilly, Roche, and Aventis. Dr. Woodson reports having received grant support from Amgen. Dr. Peacock reports having received consulting fees from Amgen. Dr. Miller reports having served as a consultant to Merck, Eli Lilly, Wyeth-Ayerst, Roche, Procter & Gamble, and Aventis; having received lecture fees from Eli Lilly, Procter & Gamble, Aventis, Roche, Amgen, Merck, and Novartis; and having received grant support from Merck, Procter & Gamble, Aventis Eli Lilly, Roche, Novartis, and Amgen. Dr. Lederman reports having received lecture fees from Eli Lilly. Dr. Chesnut reports having received grant support from Amgen. Dr. Lain reports having equity interests in Merck and Pfizer. Dr. Kivitz reports having an equity interest in Amgen. Drs. Holloway, Zhang, Peterson, and Bekker report having equity interests in Amgen; at the time the study was conducted, they were employees of Amgen. No other potential conflict of interest relevant to this article was reported. |

| Reference       | Funding sources /<br>Sources of support                                                                                                                                                                                | Conflict of interest                                                                                                                                                                                                                                                                                                                                                                                                                                                                                                                                                                                                                                                                                                                                                                                                                                                                                                                                                                                                                                                                                                                                                                                                                                                                                                                                                                                                                                                                                                                                                                                                                                                                                                                                                                                                                                                                                                                                                                                                                                                                                                                                                                                                                                                                                                               |
|-----------------|------------------------------------------------------------------------------------------------------------------------------------------------------------------------------------------------------------------------|------------------------------------------------------------------------------------------------------------------------------------------------------------------------------------------------------------------------------------------------------------------------------------------------------------------------------------------------------------------------------------------------------------------------------------------------------------------------------------------------------------------------------------------------------------------------------------------------------------------------------------------------------------------------------------------------------------------------------------------------------------------------------------------------------------------------------------------------------------------------------------------------------------------------------------------------------------------------------------------------------------------------------------------------------------------------------------------------------------------------------------------------------------------------------------------------------------------------------------------------------------------------------------------------------------------------------------------------------------------------------------------------------------------------------------------------------------------------------------------------------------------------------------------------------------------------------------------------------------------------------------------------------------------------------------------------------------------------------------------------------------------------------------------------------------------------------------------------------------------------------------------------------------------------------------------------------------------------------------------------------------------------------------------------------------------------------------------------------------------------------------------------------------------------------------------------------------------------------------------------------------------------------------------------------------------------------------|
| Author Year     | (as stated in the<br>manuscript)                                                                                                                                                                                       | (as stated in the manuscript)                                                                                                                                                                                                                                                                                                                                                                                                                                                                                                                                                                                                                                                                                                                                                                                                                                                                                                                                                                                                                                                                                                                                                                                                                                                                                                                                                                                                                                                                                                                                                                                                                                                                                                                                                                                                                                                                                                                                                                                                                                                                                                                                                                                                                                                                                                      |
| McClung<br>2009 | This study was supported and funded by Roche                                                                                                                                                                           | Not stated.                                                                                                                                                                                                                                                                                                                                                                                                                                                                                                                                                                                                                                                                                                                                                                                                                                                                                                                                                                                                                                                                                                                                                                                                                                                                                                                                                                                                                                                                                                                                                                                                                                                                                                                                                                                                                                                                                                                                                                                                                                                                                                                                                                                                                                                                                                                        |
| McClung<br>2014 | Supported by Amgen and UCB Pharma. Dr. McClung reports receiving consulting fees from Amgen, Eli Lilly, Merck, and Novartis, other honoraria from Novartis and Warner Chilcott, and grant support from Amgen and Merck | Dr. McClung reports receiving consulting fees from Amgen, Eli Lilly, Merck, and Novartis, other honoraria from Novartis and Warner Chilcott, and grant support from Amgen and Merck. Drs. Grauer, Wasserman, Katz, Maddox, Yang, and Libanati are employees of and hold stock in Amgen. Dr. Bolognese reports receiving lecture fees from Amgen and Vivus and grant support from Amgen and Regeneron. Dr. Brown reports receiving consulting fees from Amgen, Eli Lilly, Merck, and Sanofi-Aventis, lecture fees from Amgen, Eli Lilly, Merck, Novartis, and Warner Chilcott, and grant support from Abbott Laboratories, Amgen, Bristol-Myers Squibb, Eli Lilly, Merck, Novartis, Pfizer, Roche, Sanofi-Aventis, Servier, Takeda Pharmaceuticals, and Warner Chilcott. Dr. Diez-Perez reports receiving consulting fees from Eli Lilly and Amgen, lecture fees from Eli Lilly, Novartis, Merck, ViiV Healthcare, and Amgen, and travel support from Eli Lilly and holding stock in Active Life Scientific. Dr. Langdahl reports receiving personal fees from Amgen, Merck Sharp & Dohme, and Eli Lilly and grant support from Merck Sharp & Dohme and Eli Lilly. Dr. Reginster reports receiving consulting fees from Amgen, Eli Lilly, Novartis, Roche, GlaxoSmithKline, Servier, Negma Laboratories, Wyeth Pharmaceuticals, Merckle, NPS, UCB Pharma, Nycomed, and Theramex; lecture fees from Merck Sharp & Dohme, Rottapharm, Teva Pharmaceuticals, Eli Lilly, Novartis, Roche, GlaxoSmithKline, Servier, Nycomed, Theramax, Institut Biochimique Société Anonyme, Genevrier Biotechnology, Teijin, Ebewe Pharma, Zodiac Pharmaceuticals, Analis, Novo Nordisk, and Nolver; and grant support from Bristol-Myers Squibb, Merck Sharp & Dohme, Rottapharm, Teva Pharmaceuticals, Amgen, Eli Lilly, Novartis, Roche, GlaxoSmithKline, and Servier. Dr. Zanchetta reports serving as a member of the advisory board for Amgen, Eli Lilly, GlaxoSmithKline, and Merck and receiving consulting fees from Eli Lilly and lecture fees from GlaxoSmithKline. Dr. Bone reports receiving consulting fees from Merck, Novartis, Amgen, and Tarsa Therapeutics and grant support from Amgen, Merck, Novartis, Tarsa Therapeutics, and Nordic Bioscience. No other potential conflict of interest relevant to this article was reported. |
| McClung<br>2020 | This study was funded by Amgen Inc., UCB Pharma, and Astellas.                                                                                                                                                         | MRM has received consulting fees and honoraria from Amgen and consulting fees from Myovant. MAB has received contract fees from and has been a speaker for Amgen. JPB has received research funding from Amgen, Eli Lilly, Mereo Biopharma, Radius Health, and Servier; has received consulting fees from Amgen, Eli Lilly, Orimed, and Servier; and has received lecture fees from Amgen and Eli Lilly. J-YR has received research funding from IBSA-Genevrier, Mylan, CNIEL, and Radius Health; has received lecture fees from IBSA-Genevrier, Mylan, CNIEL, and Dairy Research Council; and has received consulting fees from or participated in paid advisory boards for IBSA-Genevrier, Mylan, Radius Health, and Pierre Fabre. BLL has received research funding from Amgen and Novo Nordisk; has received consulting fees from Amgen, Eli Lilly, and UCB;                                                                                                                                                                                                                                                                                                                                                                                                                                                                                                                                                                                                                                                                                                                                                                                                                                                                                                                                                                                                                                                                                                                                                                                                                                                                                                                                                                                                                                                                   |

| Reference       | Funding sources /<br>Sources of support                                   | Conflict of interest                                                                                                                                                                                                                                                                                                                                                                                                                                                                                                                                                                                                                                                                                                                                                                                                                                                                                                                                                                                                                                                                                                                                                                                                                                                                                                                                                                                                                                                                                                                                                                                                                                                                                                                                                                                  |
|-----------------|---------------------------------------------------------------------------|-------------------------------------------------------------------------------------------------------------------------------------------------------------------------------------------------------------------------------------------------------------------------------------------------------------------------------------------------------------------------------------------------------------------------------------------------------------------------------------------------------------------------------------------------------------------------------------------------------------------------------------------------------------------------------------------------------------------------------------------------------------------------------------------------------------------------------------------------------------------------------------------------------------------------------------------------------------------------------------------------------------------------------------------------------------------------------------------------------------------------------------------------------------------------------------------------------------------------------------------------------------------------------------------------------------------------------------------------------------------------------------------------------------------------------------------------------------------------------------------------------------------------------------------------------------------------------------------------------------------------------------------------------------------------------------------------------------------------------------------------------------------------------------------------------|
| Author Year     | (as stated in the<br>manuscript)                                          | (as stated in the manuscript)                                                                                                                                                                                                                                                                                                                                                                                                                                                                                                                                                                                                                                                                                                                                                                                                                                                                                                                                                                                                                                                                                                                                                                                                                                                                                                                                                                                                                                                                                                                                                                                                                                                                                                                                                                         |
| McClung<br>2021 | This study was funded by Amgen Inc., UCB Pharma, and Astellas Pharma Inc. | <p>and has received lecture fees from Amgen, Eli Lilly, and UCB. JM, YS, and MR are employees of and hold stock in Amgen. PDM is an employee of and holds stock in UCB Pharma. AG was an employee of Amgen at the time of the study and holds stock in Amgen.</p> <p>Representatives of the sponsor, Amgen Inc., designed the clinical study in collaboration with some of the study investigators and UCB Pharma, and performed the analyses according to a prespecified statistical analysis plan. Amgen Inc. maintained the study database. Lisa A. Humphries, PhD, of Amgen Inc. and Martha Mutomba (on behalf of Amgen Inc.) provided medical writing support.</p> <p>Michael R. McClung has received consulting fees from Amgen and Myovant and has received honorarium from Amgen and Alexion. Michael A. Bolognese has received contract fees and speaker fees from Amgen. Jacques P. Brown has received grants/research support from Mereo BioPharma, Radius Health, and Servier; has received consulting fees from Amgen and Servier; and has served on a speakers' bureau for Amgen. Jean-Yves Reginster has received grants/research support from IBSA-Gennevrier, Mylan, CNIEL, and Radius Health; has received lecture fees from IBSA-Gennevrier, Mylan, CNIEL, and Dairy Research Council; and has received consulting fees/participated on advisory boards for IBSA-Gennevrier, Mylan, Radius Health, and Pierre Fabre. Bente L. Langdahl has received grants/research support from Amgen and Novo Nordisk and has served on speakers' bureaus for UCB Pharma, Amgen, Eli Lilly, Gedeon-Richter, and Gilead. Yifei Shi, Arkadi Chines, and Mary K. Oates are employees of and own stock in Amgen. Jen Timoshanko and Cesar Libanati are employees of and own stock in UCB Pharma.</p> |
| Miller 2008     | This study was supported by Wyeth Research, Collegeville, PA, USA.        | <p>Dr Miller receives grant support from and/or serves as a consultant for Amgen, Merck, Novartis, Procter &amp; Gamble, Roche, and Sanofi-Aventis. Dr Christiansen serves as a consultant for Wyeth. Dr Kendler serves as a consultant for Eli Lilly, Merck, Novartis, Servier, Wyeth, and Zelos. Dr Lewiecki receives grant support from and/or serves as a consultant for Amgen, Eli Lilly, GlaxoSmithKline, Merck, Novartis, Pfizer, Procter &amp; Gamble, Roche, and Wyeth and owns stock in Procter &amp; Gamble. Dr Woodson receives grant support from Amgen, Eli Lilly, GlaxoSmithKline, Merck, and Wyeth and is a speaker for Eli Lilly. Drs Levine, Chines, and Constantine are employees of Wyeth Pharmaceuticals. Dr Delmas serves as a consultant for Wyeth. Dr Hoeck states that he has no conflicts of interest.</p>                                                                                                                                                                                                                                                                                                                                                                                                                                                                                                                                                                                                                                                                                                                                                                                                                                                                                                                                                                  |
| Miller 2016b    | This work was supported by Amgen Inc.                                     | <p>P.D.M. has received research grants from Alexion, Lilly, Amgen, Novartis, NBHA, Pfizer, the University of Alabama, Boehringer Ingelheim, Merck, Merck Serono, and Radius; is a consultant for Grünenthal, Shionogi, Radius, Amgen, and Lilly; and is a speakers' bureau member for Radius, Alexion, and Amgen. N.P., C.W., and R.B.W. are employed by Amgen and may have Amgen stock/stock options. J.P.B. has received research grants from Amgen, Eli Lilly, and Novartis and is a consultant and speakers' bureau member for Amgen and Eli Lilly. E.C. has received research grants and lecture fees from Amgen.</p>                                                                                                                                                                                                                                                                                                                                                                                                                                                                                                                                                                                                                                                                                                                                                                                                                                                                                                                                                                                                                                                                                                                                                                            |



| Reference      | Funding sources / Sources of support                                                                                             | Conflict of interest                                                                                                                                                                                                                                                                                                                                                                                                                                                                                                                                                                                                                                                                                                                                                                                                                                                                                                                                                                                                                                                                                                                                                                                                                                                                                                                                                                                                            |
|----------------|----------------------------------------------------------------------------------------------------------------------------------|---------------------------------------------------------------------------------------------------------------------------------------------------------------------------------------------------------------------------------------------------------------------------------------------------------------------------------------------------------------------------------------------------------------------------------------------------------------------------------------------------------------------------------------------------------------------------------------------------------------------------------------------------------------------------------------------------------------------------------------------------------------------------------------------------------------------------------------------------------------------------------------------------------------------------------------------------------------------------------------------------------------------------------------------------------------------------------------------------------------------------------------------------------------------------------------------------------------------------------------------------------------------------------------------------------------------------------------------------------------------------------------------------------------------------------|
| Author Year    | (as stated in the manuscript)                                                                                                    | (as stated in the manuscript)                                                                                                                                                                                                                                                                                                                                                                                                                                                                                                                                                                                                                                                                                                                                                                                                                                                                                                                                                                                                                                                                                                                                                                                                                                                                                                                                                                                                   |
|                |                                                                                                                                  | B.S.N. is a principal investigator for several Amgen studies. M.A.B. has received research grants from Pfizer, Amgen, Sanofi, and Lilly and is a consultant and speakers' bureau member for Amgen. J.M. is a speakers' bureau member for Amgen, Lilly, Grünenthal, and Mundipharma and has received other financial support from AbbVie. H.G.B. has received research grants from Amgen and Merck; is a consultant for Amgen, Merck, and Grünenthal; and is a speakers' bureau member for Amgen and Shire. J.-Y.R. has received research grants from Bristol-Myers Squibb, Merck Sharp and Dohme, Rottapharm, Teva, Roche, Amgen, Lilly, Novartis, GlaxoSmithKline, Servier, Pfizer, Theramex, Danone, Organon, Therabel, Boehringer Ingelheim, Chiltern, and Galapagos; is a consultant or adviser for Servier, Novartis, Negma, Lilly, Wyeth, Amgen, GlaxoSmithKline, Roche, Merckle, Nycomed-Takeda, NPS, IBSA-Genévrier, Theramex, UCB, Asahi Kasei, and Endocyte; and has received lecture fees from Merck Sharp and Dohme, Lilly, Rottapharm, IBSA-Genévrier, Novartis, Servier, Roche, GlaxoSmithKline, Merckle, Teijin, Teva, Analis, Theramex, Nycomed, Novo Nordisk, Ebewe Pharma, Zodiac, Danone, Will-Pharma, and Amgen. A.S. has received research grants from Amgen; is a consultant for Amgen, Actavis, and Eli Lilly; and is a speakers' bureau member for Amgen and Actavis. S.R.C. is a consultant for Amgen. |
| Mortensen 1998 | Financial support for this study was provided by Procter & Gamble Pharmaceuticals.                                               | Not stated.                                                                                                                                                                                                                                                                                                                                                                                                                                                                                                                                                                                                                                                                                                                                                                                                                                                                                                                                                                                                                                                                                                                                                                                                                                                                                                                                                                                                                     |
| Muscoso 2004   | Not stated.                                                                                                                      | Not stated.                                                                                                                                                                                                                                                                                                                                                                                                                                                                                                                                                                                                                                                                                                                                                                                                                                                                                                                                                                                                                                                                                                                                                                                                                                                                                                                                                                                                                     |
| Panico 2011    | Departmental sources - Department of Molecular and Clinical Endocrinology and Oncology, University "Federico II", Naples, Italy. | Not stated.                                                                                                                                                                                                                                                                                                                                                                                                                                                                                                                                                                                                                                                                                                                                                                                                                                                                                                                                                                                                                                                                                                                                                                                                                                                                                                                                                                                                                     |
| Pols 1999      | This study was supported by funding from Merck & Co., Inc., Whitehouse Station, New Jersey, USA.                                 | Not stated.                                                                                                                                                                                                                                                                                                                                                                                                                                                                                                                                                                                                                                                                                                                                                                                                                                                                                                                                                                                                                                                                                                                                                                                                                                                                                                                                                                                                                     |
| Recker 2004    | This trial was sponsored by F. Hoffmann-La Roche Ltd, Basel, Switzerland.                                                        | Not stated.                                                                                                                                                                                                                                                                                                                                                                                                                                                                                                                                                                                                                                                                                                                                                                                                                                                                                                                                                                                                                                                                                                                                                                                                                                                                                                                                                                                                                     |

| <b>Reference</b> | <b>Funding sources / Sources of support</b>                                                                                                     | <b>Conflict of interest</b>                                                                                                                                                                                                                                                                                                                                                                                                                                                                                                                                                                                                                                                                                                                                                                                                                                                                                                                                                                                                                                                                                                                                                                                                                                                                                                                                                                                                                                                                                                                                                                                                                                                                          |
|------------------|-------------------------------------------------------------------------------------------------------------------------------------------------|------------------------------------------------------------------------------------------------------------------------------------------------------------------------------------------------------------------------------------------------------------------------------------------------------------------------------------------------------------------------------------------------------------------------------------------------------------------------------------------------------------------------------------------------------------------------------------------------------------------------------------------------------------------------------------------------------------------------------------------------------------------------------------------------------------------------------------------------------------------------------------------------------------------------------------------------------------------------------------------------------------------------------------------------------------------------------------------------------------------------------------------------------------------------------------------------------------------------------------------------------------------------------------------------------------------------------------------------------------------------------------------------------------------------------------------------------------------------------------------------------------------------------------------------------------------------------------------------------------------------------------------------------------------------------------------------------|
| Author Year      | (as stated in the manuscript)                                                                                                                   | (as stated in the manuscript)                                                                                                                                                                                                                                                                                                                                                                                                                                                                                                                                                                                                                                                                                                                                                                                                                                                                                                                                                                                                                                                                                                                                                                                                                                                                                                                                                                                                                                                                                                                                                                                                                                                                        |
| Recker 2007      | Eli Lilly and Company sponsored this study. Drs. Lorraine, Qu, Kulkarni, Gaich, Wong, Plouffe, and Stock are employees of Eli Lilly and Company | Drs. Lorraine, Qu, Kulkarni, Gaich, Wong, Plouffe, and Stock are employees of Eli Lilly and Company.                                                                                                                                                                                                                                                                                                                                                                                                                                                                                                                                                                                                                                                                                                                                                                                                                                                                                                                                                                                                                                                                                                                                                                                                                                                                                                                                                                                                                                                                                                                                                                                                 |
| Recknor 2013     | Sponsored by Amgen Inc, Thousand Oaks, California.                                                                                              | Dr. Recknor has received consulting and advisory fees from Amgen Inc, Eli Lilly, and Novartis, lecture fees from Novartis and Warner Chilcott, a grant from Medi, and is a shareholder in Ion Med Systems. Dr. Czerwinski has received research grants from Amgen Inc, Eli Lilly, Johnson & Johnson, Merck, Serono, Novartis, Pfizer, Roche, and Servier and lecture fees from Amgen Inc, Roche, and Servier. Dr. Bone has received research grants from Amgen Inc, Merck, Novartis, and Tarsa, is a consultant or advisor for Amgen Inc, Merck, and Tarsa, and is a member of the speakers' bureau for Amgen Inc. Dr. Bonnicksen has received research grants from Amgen Inc, Merck, Takeda, and Wyeth and is a member of the speakers' bureau for Amgen Inc and Novartis. Dr. Binkley has received research grants from Amgen Inc, Eli Lilly, Merck, and Tarsa and is a consultant for Eli Lilly, Merck, and Tarsa. Dr. Palacios has received research grants from Amgen Inc, Gynea, Leon Farma, Merck, Pfizer, PregLem, and Servier and is a consultant or advisor for Abbott, Amgen Inc, Arkopharma, Bioiberica, C Fleet, Ferrer, GlaxoSmithKline, Isdin, Pfizer, Rovi, Servier, and Shionogi. Drs. Siddhanti, Ferreira, Wagman, and Hall are employees of and have stock ownership in Amgen Inc. Mrs Ghelani has received consulting fees from Amgen Inc. D. Bolognese is a consultant for Amgen Inc, Eli Lilly, Roche, and Vivus. Dr. Benhamou has received research grants from Amgen Inc, Eli Lilly, Merck, Novartis, Roche, and Servier and is member of the speakers' bureau for Amgen Inc, Merck, .Novartis, and Servier. Dr. Moffett did not report any potential conflicts of interest. |
| Reginster 2003   | This work was supported by Eli Lilly & Co.                                                                                                      | Not stated.                                                                                                                                                                                                                                                                                                                                                                                                                                                                                                                                                                                                                                                                                                                                                                                                                                                                                                                                                                                                                                                                                                                                                                                                                                                                                                                                                                                                                                                                                                                                                                                                                                                                                          |
| Reid 2002        | Supported by a grant from Novartis Pharma.                                                                                                      | Not stated.                                                                                                                                                                                                                                                                                                                                                                                                                                                                                                                                                                                                                                                                                                                                                                                                                                                                                                                                                                                                                                                                                                                                                                                                                                                                                                                                                                                                                                                                                                                                                                                                                                                                                          |
| Reid 2004        | This study was supported by a grant from Lilly Research Laboratories.                                                                           | Drs Reid, Eastell, Fogelman, Adachi, Netelenbos, Watts, and Seeman have served as consultants for or received research funding from Eli Lilly and Company.                                                                                                                                                                                                                                                                                                                                                                                                                                                                                                                                                                                                                                                                                                                                                                                                                                                                                                                                                                                                                                                                                                                                                                                                                                                                                                                                                                                                                                                                                                                                           |
| Reid 2018        | Supported by grants from the Health Research Council of New Zealand. Trial                                                                      | Dr. Reid reports receiving grant support, lecture fees, and consulting fees from Amgen and Merck, consulting fees from Novartis, and lecture fees and consulting fees from Eli Lilly. No other potential conflict of interest relevant to this article was reported.                                                                                                                                                                                                                                                                                                                                                                                                                                                                                                                                                                                                                                                                                                                                                                                                                                                                                                                                                                                                                                                                                                                                                                                                                                                                                                                                                                                                                                 |

| <b>Reference</b> | <b>Funding sources / Sources of support</b>                                                                                   | <b>Conflict of interest</b>                                                                                                                                                                                                                                                                                                                                                                                                                                                                                                                                                                                                                                                                                                                                                                                                                                                                                                                                                                                                                                                                                                                                                                                                                                                                                                                                                                                                                                                                                                                       |
|------------------|-------------------------------------------------------------------------------------------------------------------------------|---------------------------------------------------------------------------------------------------------------------------------------------------------------------------------------------------------------------------------------------------------------------------------------------------------------------------------------------------------------------------------------------------------------------------------------------------------------------------------------------------------------------------------------------------------------------------------------------------------------------------------------------------------------------------------------------------------------------------------------------------------------------------------------------------------------------------------------------------------------------------------------------------------------------------------------------------------------------------------------------------------------------------------------------------------------------------------------------------------------------------------------------------------------------------------------------------------------------------------------------------------------------------------------------------------------------------------------------------------------------------------------------------------------------------------------------------------------------------------------------------------------------------------------------------|
| Author Year      | (as stated in the manuscript)                                                                                                 | (as stated in the manuscript)                                                                                                                                                                                                                                                                                                                                                                                                                                                                                                                                                                                                                                                                                                                                                                                                                                                                                                                                                                                                                                                                                                                                                                                                                                                                                                                                                                                                                                                                                                                     |
|                  | medication was supplied by Novartis                                                                                           |                                                                                                                                                                                                                                                                                                                                                                                                                                                                                                                                                                                                                                                                                                                                                                                                                                                                                                                                                                                                                                                                                                                                                                                                                                                                                                                                                                                                                                                                                                                                                   |
| Reid 2019        | Supported by grants from the Health Research Council of New Zealand.                                                          | IRR has received fees or research funding from Amgen, Merck, Novartis and Eli Lilly. Other authors have no interests to declare.                                                                                                                                                                                                                                                                                                                                                                                                                                                                                                                                                                                                                                                                                                                                                                                                                                                                                                                                                                                                                                                                                                                                                                                                                                                                                                                                                                                                                  |
| Reid 2020        | This work was supported by grants from the Health Research Council of New Zealand. Trial medication was supplied by Novartis. | IRR has received fees or research funding from Amgen, Merck, Novartis, and Eli Lilly. Other authors have no interests to declare.                                                                                                                                                                                                                                                                                                                                                                                                                                                                                                                                                                                                                                                                                                                                                                                                                                                                                                                                                                                                                                                                                                                                                                                                                                                                                                                                                                                                                 |
| Roux 2014        | This study was funded by Amgen Inc.                                                                                           | C Roux: Research grants and/or consulting or speaking fees from Amgen Inc., Bongrain, Lilly, MSD, Novartis, Roche, and Servier. LC Hofbauer: Research grants and/or consulting fees from Amgen Inc., Merck, and Novartis, and the osteoporosis program is supported by DFG Forschergruppe-1586 (SKELMET). PR Ho, I Ferreira, S Siddhanti, and RB Wagman: Employees of Amgen Inc. and may own stock and/or stock options in Amgen Inc. JD Wark: Research grants and/or consulting or speaking fees from Amgen Inc., Eli Lilly, Merck, Novartis, Servier, Sanofi, and UCB. MC Zillikens: Consulting and/or speaking fees from Amgen Inc., Eli Lilly, Merck, Novartis, and Servier. A Fahrleitner-Pammer: Research grants and/or consulting or speaking fees from Amgen Inc., Eli Lilly, Novartis, Roche, Sanofi, Servier, and Takeda. F Hawkins: Nothing to disclose. M Micaelo: Nothing to disclose. S Minisola: Consulting and/or speaking fees from Abiogen, Amgen Inc., Bruno Farmaceutici, Eli Lilly, GSK, Medtronic, Merck Sharp & Dohme, Nycomed, Neopharmed, Novartis, Pfizer, Roche, Sigma Tau, Stroder, and Warner Chilcott. N Papaioannou: Research grants and/or consulting or speaking fees from Amgen Inc., Eli Lilly, and Servier. M Stone: Research grants and/or consulting or speaking fees from Amgen Inc., Eli Lilly, Merck, and Servier. JP Brown: Research grants and/or consulting or speaking fees from Amgen Inc., Bristol-Myers Squibb, Eli Lilly, Merck, Novartis, Pfizer, Sanofi, Servier, Takeda, and Warner-Chilcott. |
| Saag 2017        | Supported by Amgen, Astellas Pharma, and UCB Pharma.                                                                          | Dr. Saag reports receiving grant support and consulting fees from Amgen and Merck and consulting fees from Radius Health and Eli Lilly; Drs. Petersen, Maddox, Fan, and Grauer, being employed by and owning stock and stock options in Amgen; Dr. Karaplis, receiving grant support from and being a member of the National Advisory Board of Amgen Canada; Dr. Lorentzon, receiving lecture fees from Amgen, Eli Lilly, Meda Pharmaceuticals, and UCB Pharma, consulting fees from Radius Health and Consilient Health, and lecture fees and consulting fees from Renapharma; Dr. Thomas, receiving grant support, lecture fees, and consulting fees from Amgen, Merck Sharp & Dohme, and UCB Pharma, grant support and lecture fees from Chugai and Pfizer, consulting fees                                                                                                                                                                                                                                                                                                                                                                                                                                                                                                                                                                                                                                                                                                                                                                    |

| <b>Reference</b> | <b>Funding sources / Sources of support</b>                                                                     | <b>Conflict of interest</b>                                                                                                                                                                                                                                                                                                                                                                                                                                 |
|------------------|-----------------------------------------------------------------------------------------------------------------|-------------------------------------------------------------------------------------------------------------------------------------------------------------------------------------------------------------------------------------------------------------------------------------------------------------------------------------------------------------------------------------------------------------------------------------------------------------|
| Author Year      | (as stated in the manuscript)                                                                                   | (as stated in the manuscript)                                                                                                                                                                                                                                                                                                                                                                                                                               |
|                  |                                                                                                                 | from Expanscience, Gilead Sciences, LCA, Thuasne, and Medac, grant support and consulting fees from HAC Pharma, grant support from Novartis, lecture fees from AbbVie and Bristol-Myers Squibb, and lecture fees and consulting fees from Eli Lilly and Teva Pharmaceutical Industries; and Dr. Meisner, being employed by and owning stock and stock options in UCB Pharma. No other potential conflict of interest relevant to this article was reported. |
| Sambrook 2004    | Funding for this clinical trial was provided by Merck & Co., Inc., Whitehouse Station, NJ, USA                  | P. Sambrook and P. Geusens have served as paid consultants and speakers for Merck & Co., Inc. K. Gaines, N. Verbruggen and M. Melton are employees of Merck & Co., Inc. and potentially own stock and/or hold stock options in the Company.                                                                                                                                                                                                                 |
| Valimaki 2007    | Funding for this study was provided by the Alliance for Better Bone Health (Procter & Gamble and sanofiaventis) | The authors received editorial and writing support in the preparation of the manuscript, funded by the Alliance for Better Bone Health. Corine Visser, PhD, provided writing and editorial support. The authors were fully responsible for content and editorial decisions for the manuscript.                                                                                                                                                              |

## S1 Fig. Funnel Plots

Funnel plot of comparison: Treatment vs. Placebo, outcome: Clinical fractures

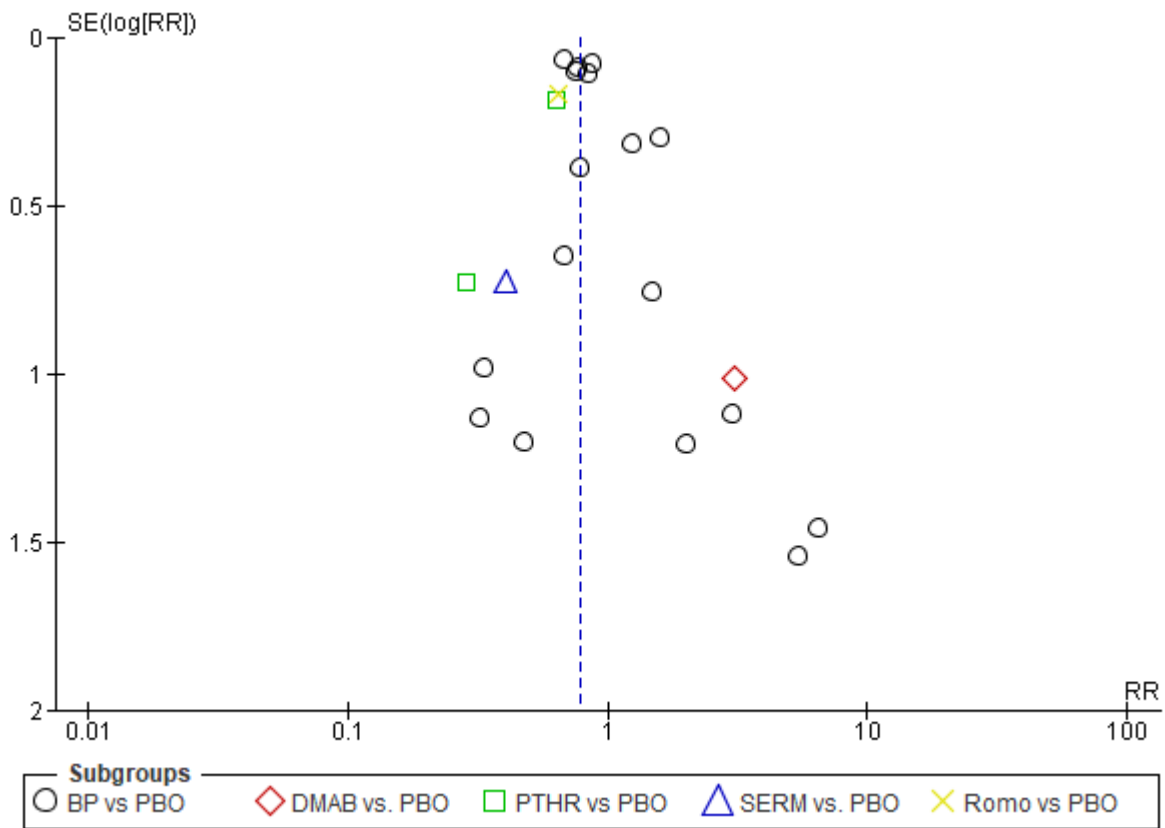

Abbreviations: Bisphosphonates [BP], denosumab [DMAB], parathyroid hormone receptor agonist [PTHRA], placebo [PBO], romosozumab [Romo], selective oestrogen receptor modulators [SERM], SE [standard error], RR [risk ratio]

Funnel plot of comparison: Treatment vs. Comparator, outcome: Clinical fractures

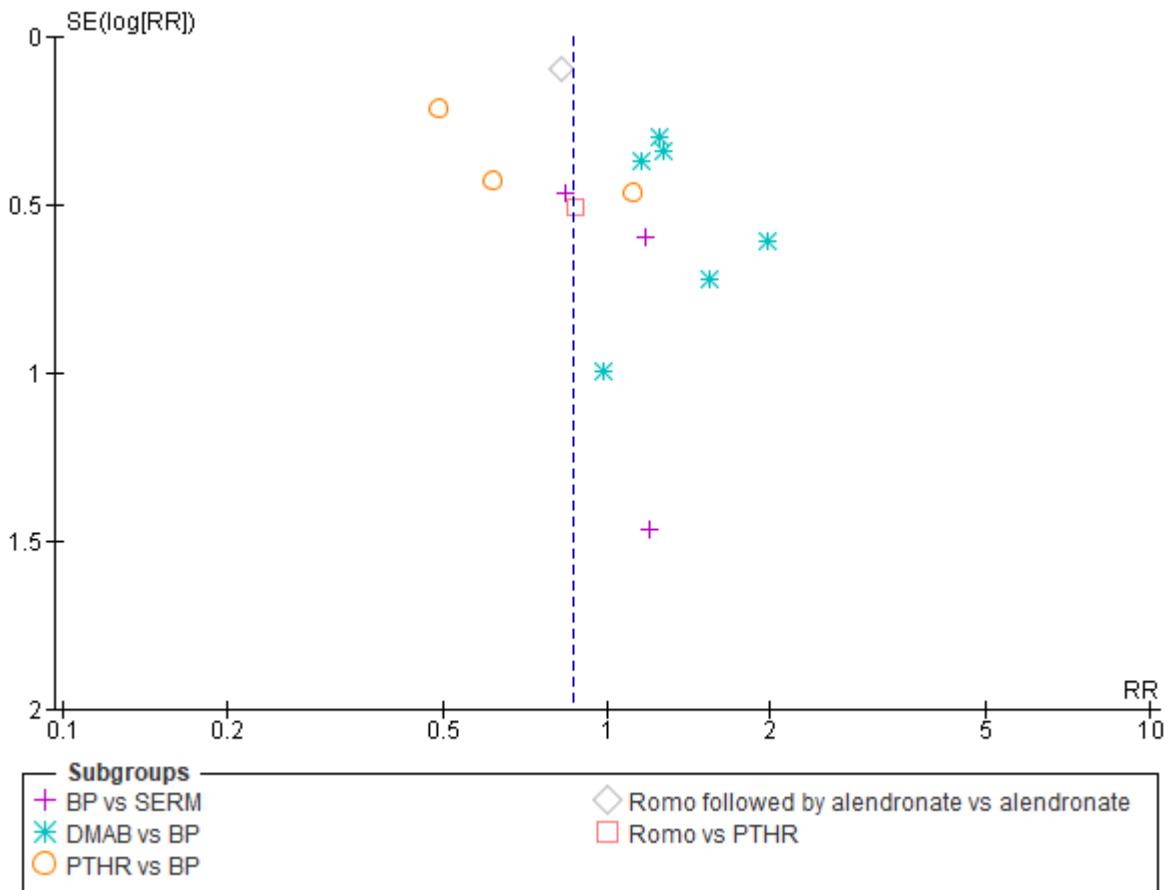

Abbreviations: Bisphosphonates [BP], denosumab [DMAB], parathyroid hormone receptor agonist [PTHr], romosozumab [Romo], selective oestrogen receptor modulators [SERM], SE [standard error], RR [risk ratio]

Funnel plot of comparison: Treatment vs. Placebo, outcome: Vertebral fractures

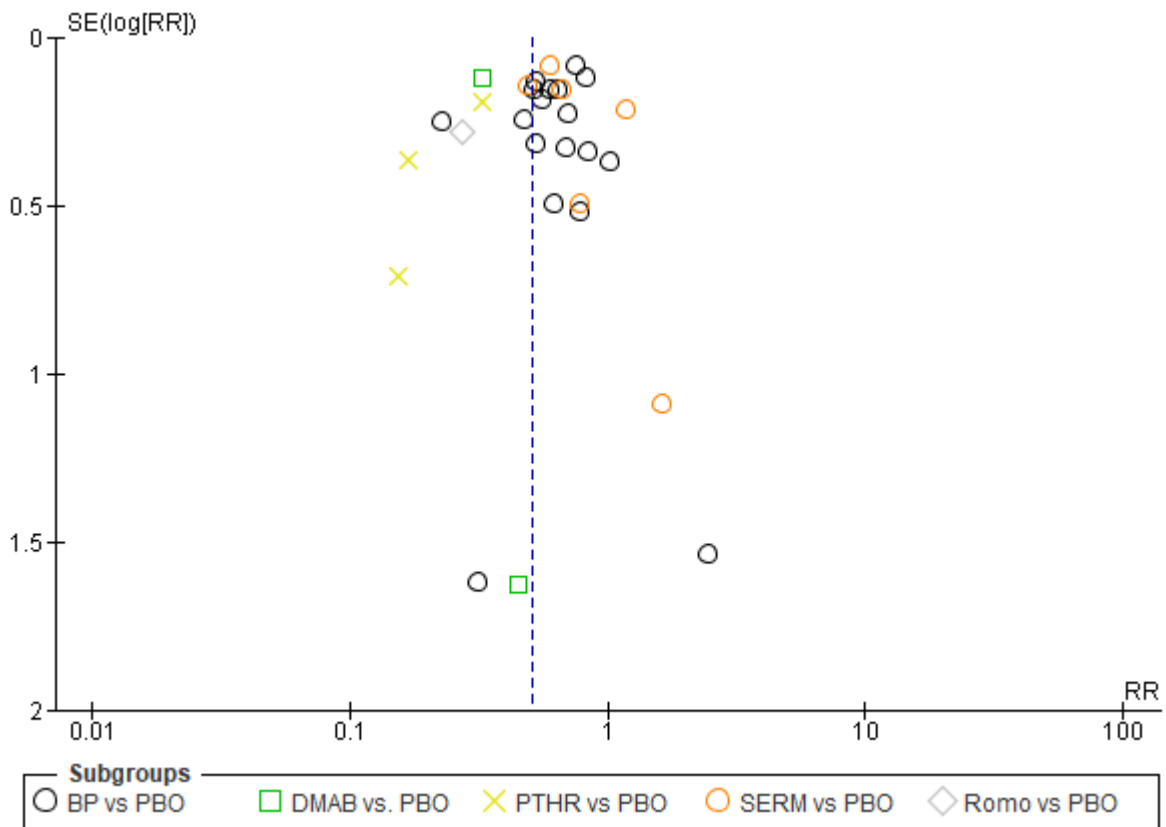

Abbreviations: Bisphosphonates [BP], denosumab [DMAB], parathyroid hormone receptor agonist [PTH], placebo [PBO], romosozumab [Romo], selective oestrogen receptor modulators [SERM], SE [standard error], RR [risk ratio]

Funnel plot of comparison: Treatment vs. Comparator, outcome: Vertebral fractures

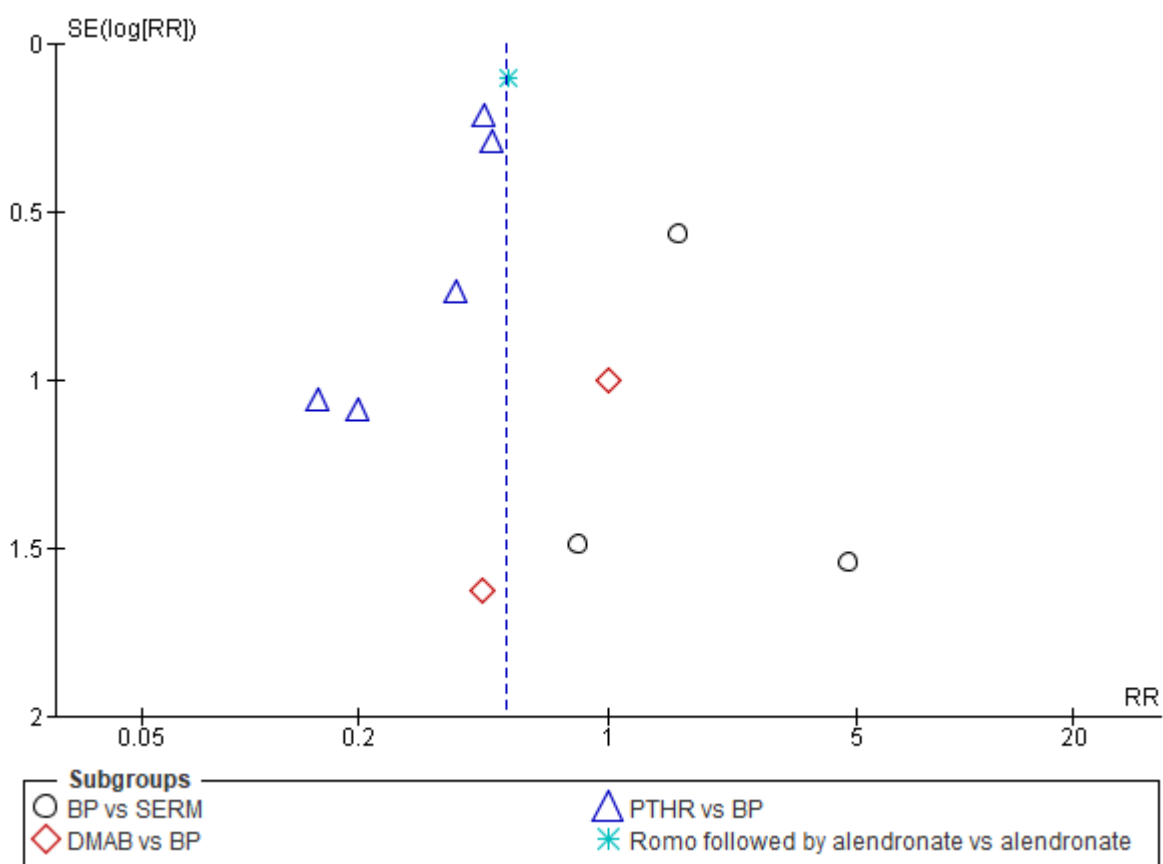

Abbreviations: Bisphosphonates [BP], denosumab [DMAB], parathyroid hormone receptor agonist [PTHR], romosozumab [Romo], selective oestrogen receptor modulators [SERM], SE [standard error], RR [risk ratio]



Funnel plot of comparison: Treatment vs. Placebo, outcome: Non-vertebral fractures

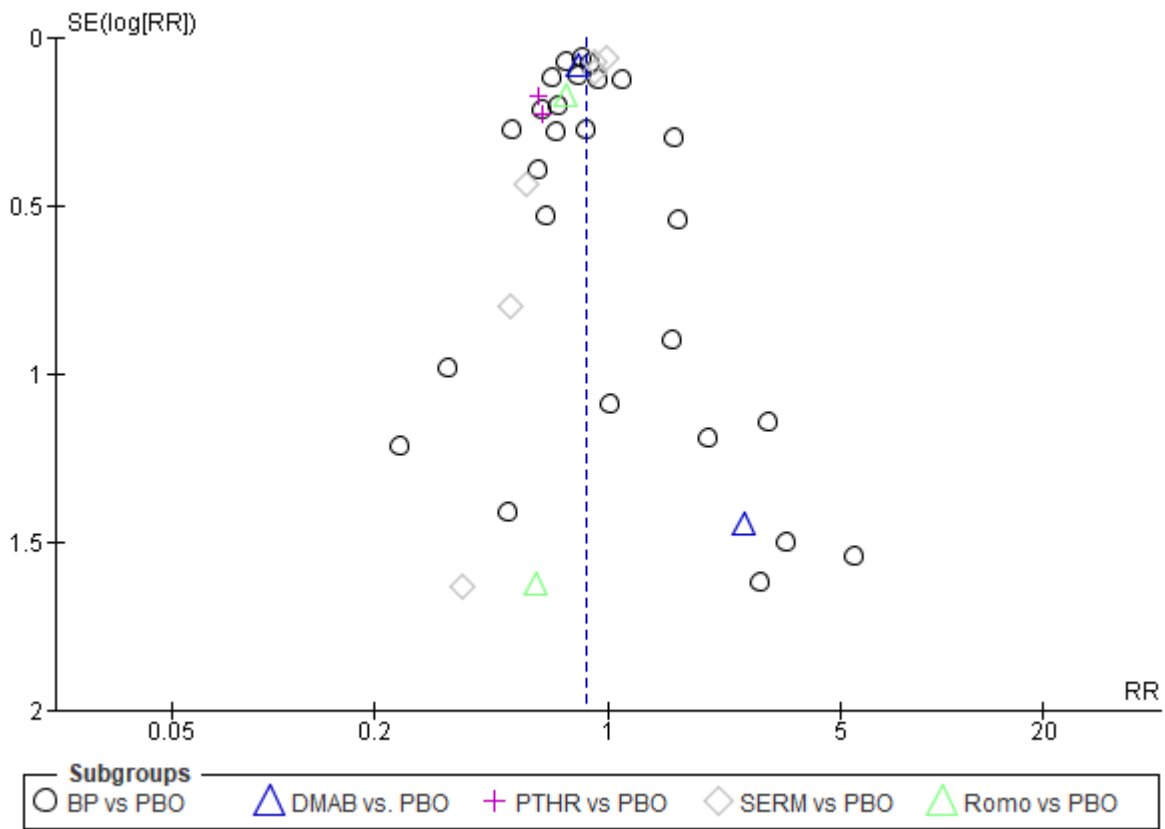

Abbreviations: Bisphosphonates [BP], denosumab [DMAB], parathyroid hormone receptor agonist [PTHRA], selective oestrogen receptor modulators [SERM], SE [standard error], RR [risk ratio]

Funnel plot of comparison: Treatment vs. Comparator, outcome: Non-vertebral fractures

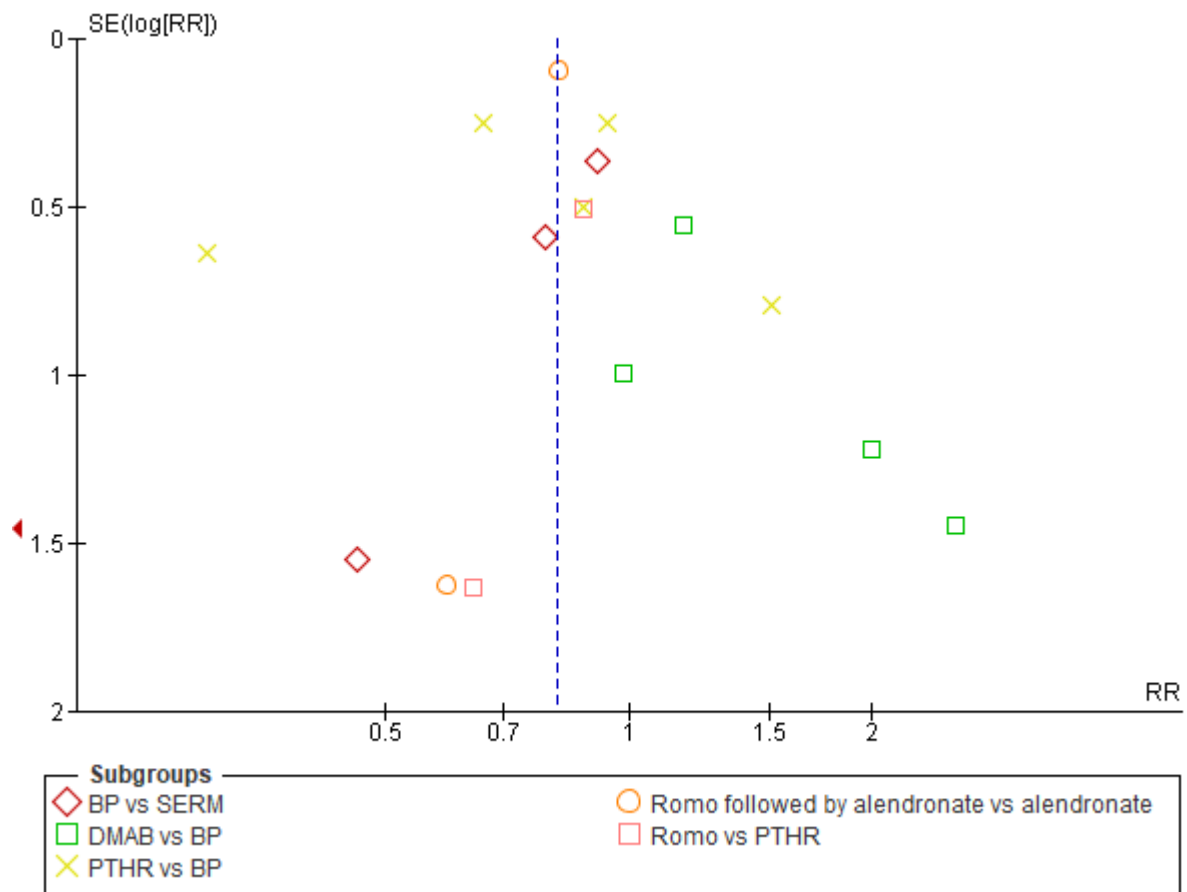

Abbreviations: Bisphosphonates [BP], denosumab [DMAB], parathyroid hormone receptor agonist [PTHR], romosozumab [Romo], selective oestrogen receptor modulators [SERM], SE [standard error], RR [risk ratio]

Funnel plot of comparison: Treatment vs. Placebo, outcome: Hip fractures

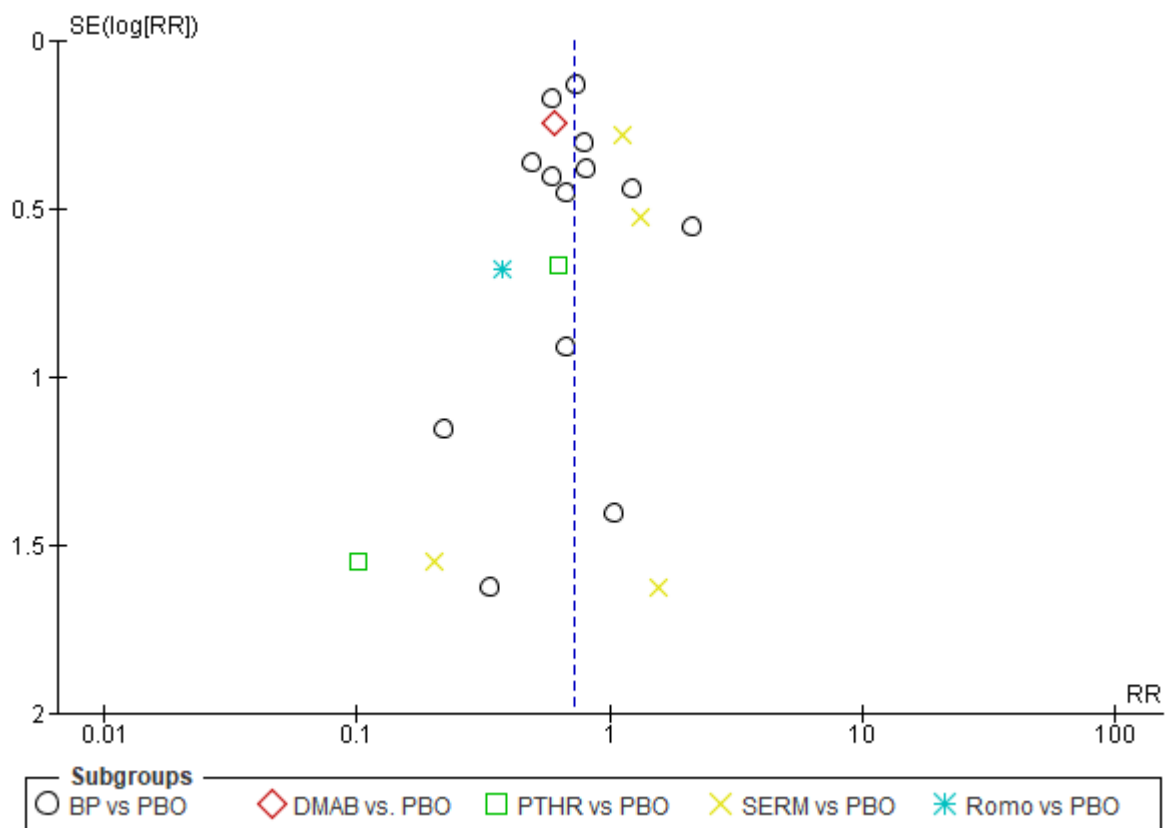

Abbreviations: Bisphosphonates [BP], denosumab [DMAB], parathyroid hormone receptor agonist [PTHr], placebo [PBO], romosozumab [Romo], selective oestrogen receptor modulators [SERM], SE [standard error], RR [risk ratio]

## S6 Table. Estimates of effects and quality ratings for comparison of drugs

### Estimates of effects and quality ratings for comparison of drugs to prevent vertebral fractures

| Comparison  | Direct evidence           |                                                                   | Network meta-analysis  |                          |
|-------------|---------------------------|-------------------------------------------------------------------|------------------------|--------------------------|
|             | Relative Risk<br>[95% CI] | Absolute Risk*<br>[95% CI]                                        | Odds Ratio<br>[95% CI] | Certainty of<br>Evidence |
| PTHR v PBO  | 0.24 [0.14, 0.41]         | 96 fewer per 1000<br>[from 112 fewer to 74 fewer] <sup>§</sup>    | -                      | MODERATE <sup>a</sup>    |
| SERM v PBO  | 0.67 [0.52, 0.86]         | 14 fewer per 1000<br>[from 20 fewer to 6 fewer] <sup>§§</sup>     | -                      | MODERATE <sup>a</sup>    |
| Romo v PBO  | 0.27 [0.16, 0.47]         | 13 fewer per 1000<br>[from 15 fewer to 10 fewer] <sup>§§§</sup>   | -                      | MODERATE <sup>a</sup>    |
| PTHR v BP   | 0.43 [0.31, 0.60]         | 63 fewer per 1000<br>[from 77 fewer to 44 fewer] <sup>§§§§</sup>  | -                      | MODERATE <sup>a</sup>    |
| Dmab v BP   | 0.80 [0.15, 4.24]         | -                                                                 | -                      | LOW <sup>a,d</sup>       |
| Romo v BP   | 0.52 [0.43, 0.64]         | 57 fewer per 1000<br>[from 68 fewer to 43 fewer] <sup>§§§§§</sup> | -                      | MODERATE <sup>a</sup>    |
| Romo v PTHR | -                         | -                                                                 | -                      | LOW <sup>a,d</sup>       |
| BP v Dmab   | -                         | -                                                                 | 1.83 [1.14, 2.93]      | MODERATE <sup>a</sup>    |
| BP v PBO    | 0.61 [0.52, 0.70]         | 26 fewer per 1000<br>[from 32 fewer to 20 fewer]<br>§§§§§         | 0.58 [0.50, 0.67]      | MODERATE <sup>a</sup>    |
| BP v PTHR   | -                         | -                                                                 | 2.51 [1.82, 3.46]      | MODERATE <sup>a</sup>    |
| BP v Romo   | -                         | -                                                                 | 2.06 [1.40, 3.03]      | MODERATE <sup>a</sup>    |
| BP v SERM   | 1.64 [0.61, 4.38]         | -                                                                 | 0.97 [0.73, 1.29]      | LOW <sup>a,d</sup>       |
| Dmab v PBO  | 0.33 [0.26, 0.41]         | 46 fewer per 1000<br>[from 50 fewer to 40 fewer]<br>§§§§§§        | 0.32 [0.20, 0.50]      | MODERATE <sup>a</sup>    |
| Dmab v PTHR | -                         | -                                                                 | 1.37 [0.79, 2.39]      | LOW <sup>a,d</sup>       |
| Dmab v Romo | -                         | -                                                                 | 1.13 [0.62, 2.06]      | LOW <sup>a,d</sup>       |
| Dmab v SERM | -                         | -                                                                 | 0.53 [0.32, 0.89]      | LOW <sup>a,d</sup>       |
| PBO v PTHR  | -                         | -                                                                 | 4.36 [3.15, 6.01]      | MODERATE <sup>a</sup>    |
| PBO v Romo  | -                         | -                                                                 | 3.58 [2.41, 5.32]      | MODERATE <sup>a</sup>    |
| PBO v SERM  | -                         | -                                                                 | 1.69 [1.32, 2.16]      | MODERATE <sup>a</sup>    |
| PTHR v Romo | -                         | -                                                                 | 0.82 [0.50, 1.35]      | LOW <sup>a,d</sup>       |
| PTHR v SERM | -                         | -                                                                 | 0.39 [0.26, 0.58]      | MODERATE <sup>a</sup>    |
| Romo v SERM | -                         | -                                                                 | 0.47 [0.30, 0.75]      | MODERATE <sup>a</sup>    |

Abbreviations: Bisphosphonates [BP], confidence interval [CI], denosumab [Dmab], parathyroid hormone receptor [PTHR] agonists, placebo [PBO], romosozumab [Romo], selective oestrogen receptor modulators [SERM].

\*The absolute measure of intervention effects is a difference between the baseline risk of an outcome (median in control group) and the risk of outcome after the intervention is applied. <sup>§</sup> Baseline risk calculated from Neer 2001; <sup>§§</sup> Baseline risk calculated from Silverman 2008; <sup>§§§</sup> Baseline risk calculated from Cosman 2016; <sup>§§§§</sup> Baseline risk calculated from Cosman 2005; <sup>§§§§§</sup> Baseline risk calculated from Saag 2017; <sup>§§§§§§</sup> Baseline risk calculated from Bone 1997; <sup>§§§§§§§</sup> Baseline risk calculated from Cummings 2009

<sup>a</sup> Downgraded due to serious risk of bias; <sup>b</sup> Downgraded due to serious risk of inconsistency; <sup>c</sup> Downgraded due to serious risk of indirectness; <sup>d</sup> Downgraded due to serious risk of imprecision; <sup>e</sup> Downgraded due to serious risk of publication bias.

## Estimates of effects and quality ratings for comparison of drugs to prevent non-vertebral fractures.

The network meta-analysis did not provide information on non-vertebral fractures

| Comparison  | Direct evidence           |                                                                | Network meta-analysis  |                          |
|-------------|---------------------------|----------------------------------------------------------------|------------------------|--------------------------|
|             | Relative Risk<br>[95% CI] | Absolute Risk*<br>[95% CI]                                     | Odds Ratio<br>[95% CI] | Certainty of<br>Evidence |
| PTHR v PBO  | 0.63 [0.48, 0.82]         | 15 fewer per 1000<br>[from 21 fewer to 7 fewer] <sup>§</sup>   | -                      | MODERATE <sup>a</sup>    |
| SERM v PBO  | 0.94 [0.86, 1.02]         | -                                                              | -                      | LOW <sup>a,d</sup>       |
| Romo v PBO  | 0.75 [0.53, 1.05]         | -                                                              | -                      | LOW <sup>a,d</sup>       |
| PTHR v BP   | 0.77 [0.56, 1.05]         | -                                                              | -                      | LOW <sup>a,d</sup>       |
| Dmab v BP   | 1.29 [0.56, 2.99]         | -                                                              | -                      | LOW <sup>a,d</sup>       |
| Romo v BP   | 0.82 [0.68, 0.99]         | -                                                              | -                      | LOW <sup>a,d</sup>       |
| Romo v PTHR | 0.85 [0.33, 2.20]         | -                                                              | -                      | LOW <sup>a,d</sup>       |
| BP v Dmab   | -                         | -                                                              | -                      | -                        |
| BP v PBO    | 0.83 [0.76, 0.90]         | 8 fewer per 1000<br>[from 11 fewer to 5 fewer] <sup>§§</sup>   | -                      | MODERATE <sup>a</sup>    |
| BP v PTHR   | -                         | -                                                              | -                      | -                        |
| BP v Romo   | -                         | -                                                              | -                      | -                        |
| BP v SERM   | 0.76 [0.42, 1.39]         | -                                                              | -                      | LOW <sup>a,d</sup>       |
| Dmab v PBO  | 0.82 [0.69, 0.96]         | 14 fewer per 1000<br>[from 23 fewer to 3 fewer] <sup>§§§</sup> | -                      | MODERATE <sup>a</sup>    |
| Dmab v PTHR | -                         | -                                                              | -                      | -                        |
| Dmab v Romo | -                         | -                                                              | -                      | -                        |
| Dmab v SERM | -                         | -                                                              | -                      | -                        |
| PBO v PTHR  | -                         | -                                                              | -                      | -                        |
| PBO v Romo  | -                         | -                                                              | -                      | -                        |
| PBO v SERM  | -                         | -                                                              | -                      | -                        |
| PTHR v Romo | -                         | -                                                              | -                      | -                        |
| PTHR v SERM | -                         | -                                                              | -                      | -                        |
| Romo v SERM | -                         | -                                                              | -                      | -                        |

Abbreviations: Bisphosphonates [BP], confidence interval [CI], denosumab [Dmab], parathyroid hormone receptor [PTHR] agonists, placebo [PBO], romosozumab [Romo], selective oestrogen receptor modulators [SERM].

\*The absolute measure of intervention effects is a difference between the baseline risk of an outcome (median in control group) and the risk of outcome after the intervention is applied. <sup>§</sup> Baseline risk calculated from Miller 2016 (ACTIVE study); <sup>§§</sup> Baseline risk calculated from Hooper 2005; <sup>§§§</sup> Baseline risk calculated from Cummings 2009.

<sup>a</sup> Downgraded due to serious risk of bias; <sup>b</sup> Downgraded due to serious risk of inconsistency; <sup>c</sup> Downgraded due to serious risk of indirectness; <sup>d</sup> Downgraded due to serious risk of imprecision; <sup>e</sup> Downgraded due to serious risk of publication bias.

## Estimates of effects and quality ratings for comparison of drugs to prevent hip fractures

| Comparison  | Direct evidence           |                                                              | Network meta-analysis  |                          |
|-------------|---------------------------|--------------------------------------------------------------|------------------------|--------------------------|
|             | Relative Risk<br>[95% CI] | Absolute Risk*<br>[95% CI]                                   | Odds Ratio<br>[95% CI] | Certainty of<br>Evidence |
| PTHR v PBO  | 0.43 [0.10, 1.82]         | -                                                            | -                      | LOW <sup>a,d</sup>       |
| SERM v PBO  | 1.11 [0.69, 1.79]         | -                                                            | -                      | LOW <sup>a,d</sup>       |
| Romo v PBO  | 0.37 [0.10, 1.41]         | -                                                            | -                      | LOW <sup>a,d</sup>       |
| PTHR v BP   | 0.68 [0.20, 2.40]         | -                                                            | -                      | LOW <sup>a,d</sup>       |
| Dmab v BP   | 0.33 [0.01, 8.14]         | -                                                            | -                      | LOW <sup>a,d</sup>       |
| Romo v BP   | 0.62 [0.42, 0.91]         | 12 fewer per 1000<br>[from 19 fewer to 3 fewer] <sup>§</sup> | -                      | MODERATE <sup>a</sup>    |
| Romo v PTHR | 3.00 [0.12, 73.24]        | -                                                            | -                      | LOW <sup>a,d</sup>       |
| BP v Dmab   | -                         | -                                                            | 1.25 [0.74, 2.13]      | LOW <sup>a,d</sup>       |
| BP v PBO    | 0.70 [0.59, 0.83]         | 4 fewer per 1000<br>[from 5 fewer to 2 fewer] <sup>§§</sup>  | 0.72 [0.60, 0.85]      | MODERATE <sup>a</sup>    |
| BP v PTHR   | -                         | -                                                            | 1.63 [0.81, 3.26]      | LOW <sup>a,d</sup>       |
| BP v Romo   | -                         | -                                                            | 1.63 [1.10, 2.42]      | MODERATE <sup>a</sup>    |
| BP v SERM   | 0.42 [0.06, 2.88]         | -                                                            | 0.72 [0.45, 1.16]      | LOW <sup>a,d</sup>       |
| Dmab v PBO  | 0.61 [0.37, 0.98]         | 4 fewer per 1000<br>[from 7 fewer to 0 fewer] <sup>§§§</sup> | 0.57 [0.35, 0.95]      | MODERATE <sup>a</sup>    |
| Dmab v PTHR | -                         | -                                                            | 1.30 [0.55, 3.07]      | LOW <sup>a,d</sup>       |
| Dmab v Romo | -                         | -                                                            | 1.31 [0.68, 2.52]      | LOW <sup>a,d</sup>       |
| Dmab v SERM | -                         | -                                                            | 0.58 [0.30, 1.13]      | LOW <sup>a,d</sup>       |
| PBO v PTHR  | -                         | -                                                            | 2.28 [1.13, 4.58]      | MODERATE <sup>a</sup>    |
| PBO v Romo  | -                         | -                                                            | 2.28 [1.50, 3.48]      | MODERATE <sup>a</sup>    |
| PBO v SERM  | -                         | -                                                            | 1.01 [0.65, 1.58]      | LOW <sup>a,d</sup>       |
| PTHR v Romo | -                         | -                                                            | 1.00 [0.45, 2.22]      | LOW <sup>a,d</sup>       |
| PTHR v SERM | -                         | -                                                            | 0.44 [0.20, 1.01]      | LOW <sup>a,d</sup>       |
| Romo v SERM | -                         | -                                                            | 0.44 [0.24, 0.81]      | MODERATE <sup>a</sup>    |

Abbreviations: Bisphosphonates [BP], confidence interval [CI], denosumab [Dmab], parathyroid hormone receptor [PTHR] agonists, placebo [PBO], romosozumab [Romo], selective oestrogen receptor modulators [SERM].

\*The absolute measure of intervention effects is a difference between the baseline risk of an outcome (median in control group) and the risk of outcome after the intervention is applied. <sup>§</sup> Baseline risk calculated from Saag 2017; <sup>§§</sup> Baseline risk calculated from Reid 2018; <sup>§§§</sup> Baseline risk calculated from Cummings 2009.

<sup>a</sup> Downgraded due to serious risk of bias; <sup>b</sup> Downgraded due to serious risk of inconsistency; <sup>c</sup> Downgraded due to serious risk of indirectness; <sup>d</sup> Downgraded due to serious risk of imprecision; <sup>e</sup> Downgraded due to serious risk of publication bias.

## Estimates of effects and quality ratings for comparison of drugs to prevent major osteoporotic fractures

| Comparison  | Direct evidence           |                                                  | Network meta-analysis  |                          |
|-------------|---------------------------|--------------------------------------------------|------------------------|--------------------------|
|             | Relative Risk<br>[95% CI] | Absolute Risk*<br>[95% CI]                       | Odds Ratio<br>[95% CI] | Certainty of<br>Evidence |
| PTHR v PBO  | 0.52 [0.37, 0.75]         | 20 fewer per 1000<br>[from 26 fewer to 10 fewer] | -                      | MODERATE <sup>a</sup>    |
| SERM v PBO  | 0.57 [0.24, 1.34]         | -                                                | -                      | LOW <sup>a,d</sup>       |
| Romo v PBO  | 0.60 [0.40, 0.89]         | 7 fewer per 1000<br>[from 11 fewer to 2 fewer]   | -                      | MODERATE <sup>a</sup>    |
| PTHR v BP   | 0.46 [0.27, 0.79]         | 32 fewer per 1000<br>[from 44 fewer to 13 fewer] | -                      | MODERATE <sup>a</sup>    |
| Dmab v BP   | 1.26 [0.67, 2.38]         | -                                                | -                      | LOW <sup>a,d</sup>       |
| Romo v BP   | 0.72 [0.52, 0.99]         | -                                                | -                      | MODERATE <sup>a</sup>    |
| BP v Dmab   | -                         | -                                                | 0.71 [0.30, 1.66]      | LOW <sup>a,d</sup>       |
| BP v PBO    | 1.01 [0.19, 5.38]         | -                                                | 0.66 [0.46, 0.94]      | MODERATE <sup>a</sup>    |
| BP v PTHR   | -                         | -                                                | 1.29 [0.69, 2.42]      | LOW <sup>a,d</sup>       |
| BP v Romo   | -                         | -                                                | 1.28 [0.84, 1.95]      | LOW <sup>a,d</sup>       |
| BP v SERM   | -                         | -                                                | 1.18 [0.33, 4.27]      | LOW <sup>a,d</sup>       |
| Dmab v PBO  | 3.73 [0.22, 61.96]        | -                                                | 0.93 [0.38, 2.26]      | LOW <sup>a,d</sup>       |
| Dmab v PTHR | -                         | -                                                | 1.82 [0.65, 5.07]      | LOW <sup>a,d</sup>       |
| Dmab v Romo | -                         | -                                                | 1.81 [0.71, 4.60]      | LOW <sup>a,d</sup>       |
| Dmab v SERM | -                         | -                                                | 1.66 [0.37, 7.56]      | LOW <sup>a,d</sup>       |
| PBO v PTHR  | -                         | -                                                | 1.96 [1.15, 3.33]      | MODERATE <sup>a</sup>    |
| PBO v Romo  | -                         | -                                                | 1.95 [1.26, 3.04]      | MODERATE <sup>a</sup>    |
| PBO v SERM  | -                         | -                                                | 1.79 [0.52, 6.21]      | LOW <sup>a,d</sup>       |
| PTHR v Romo | -                         | -                                                | 1.00 [0.50, 1.98]      | LOW <sup>a,d</sup>       |
| PTHR v SERM | -                         | -                                                | 0.92 [0.24, 3.52]      | LOW <sup>a,d</sup>       |
| Romo v SERM | -                         | -                                                | 0.92 [0.25, 3.42]      | LOW <sup>a,d</sup>       |

Abbreviations: Bisphosphonates [BP], confidence interval [CI], denosumab [Dmab], parathyroid hormone receptor [PTHr] agonists, placebo [PBO], romosozumab [Romo], selective oestrogen receptor modulators [SERM].

\*The absolute measure of intervention effects is a difference between the baseline risk of an outcome (median in control group) and the risk of outcome after the intervention is applied. <sup>§</sup> Baseline risk calculated from Miller 2016 (ACTIVE); <sup>§§</sup> Baseline risk calculated from Reid 2018; <sup>§§§</sup> Baseline risk calculated from Cummings 2009.

<sup>a</sup> Downgraded due to serious risk of bias; <sup>b</sup> Downgraded due to serious risk of inconsistency; <sup>c</sup> Downgraded due to serious risk of indirectness; <sup>d</sup> Downgraded due to serious risk of imprecision; <sup>e</sup> Downgraded due to serious risk of publication bias.

## Estimates of effects and quality ratings for comparison of drugs in relation to all-cause mortality

| Comparison  | Direct evidence           |                           | Network meta-analysis  |                          |
|-------------|---------------------------|---------------------------|------------------------|--------------------------|
|             | Relative Risk<br>[95% CI] | Absolute Risk<br>[95% CI] | Odds Ratio<br>[95% CI] | Certainty of<br>Evidence |
| PTHR v PBO  | 1.27 [0.64, 2.51]         | -                         | -                      | LOW <sup>a,d</sup>       |
| SERM v PBO  | 0.94 [0.85, 1.05]         | -                         | -                      | LOW <sup>a,d</sup>       |
| Romo v PBO  | 0.81 [0.22, 2.96]         | -                         | -                      | LOW <sup>a,d</sup>       |
| PTHR v BP   | 0.70 [0.24, 2.02]         | -                         | -                      | LOW <sup>a,d</sup>       |
| Dmab v BP   | 0.62 [0.17, 2.20]         | -                         | -                      | LOW <sup>a,d</sup>       |
| Romo v BP   | 0.98 [0.74, 1.31]         | -                         | -                      | LOW <sup>a,d</sup>       |
| Romo v PTHR | 0.82 [0.10, 6.62]         | -                         | -                      | LOW <sup>a,d</sup>       |
| SERM v BP   | 1.63 [0.20, 13.20]        | -                         | -                      | LOW <sup>a,d</sup>       |
| BP v Dmab   | -                         | -                         | 1.34 [0.95, 1.89]      | LOW <sup>a,d</sup>       |
| BP v PBO    | 0.99 [0.86, 1.12]         | -                         | 0.99 [0.86, 1.13]      | LOW <sup>a,d</sup>       |
| BP v PTHR   | -                         | -                         | 0.86 [0.51, 1.43]      | LOW <sup>a,d</sup>       |
| BP v Romo   | -                         | -                         | 0.96 [0.75, 1.24]      | LOW <sup>a,d</sup>       |
| BP v SERM   | -                         | -                         | 1.05 [0.87, 1.26]      | LOW <sup>a,d</sup>       |
| Dmab v PBO  | 0.77 [0.57, 1.05]         | -                         | 0.73 [0.53, 1.01]      | LOW <sup>a,d</sup>       |
| Dmab v PTHR | -                         | -                         | 0.69 [0.35, 1.17]      | LOW <sup>a,d</sup>       |
| Dmab v Romo | -                         | -                         | 0.72 [0.48, 1.08]      | LOW <sup>a,d</sup>       |
| Dmab v SERM | -                         | -                         | 0.78 [0.55, 1.10]      | LOW <sup>a,d</sup>       |
| PBO v PTHR  | -                         | -                         | 0.87 [0.52, 1.46]      | LOW <sup>a,d</sup>       |
| PBO v Romo  | -                         | -                         | 0.98 [0.76, 1.27]      | LOW <sup>a,d</sup>       |
| PBO v SERM  | -                         | -                         | 1.06 [0.94, 1.21]      | LOW <sup>a,d</sup>       |
| PTHR v Romo | -                         | -                         | 1.13 [0.64, 1.98]      | LOW <sup>a,d</sup>       |
| PTHR v SERM | -                         | -                         | 1.22 [0.72, 2.08]      | LOW <sup>a,d</sup>       |
| Romo v SERM | -                         | -                         | 1.09 [0.81, 1.45]      | LOW <sup>a,d</sup>       |

Abbreviations: Bisphosphonates [BP], confidence interval [CI], denosumab [Dmab], parathyroid hormone receptor [PTHR] agonists, placebo [PBO], romosozumab [Romo], selective oestrogen receptor modulators [SERM].

<sup>a</sup> Downgraded due to serious risk of bias; <sup>b</sup> Downgraded due to serious risk of inconsistency; <sup>c</sup> Downgraded due to serious risk of indirectness; <sup>d</sup> Downgraded due to serious risk of imprecision; <sup>e</sup> Downgraded due to serious risk of publication bias.



## Estimates of effects and quality ratings for comparison of drugs in relation to adverse events

| Comparison  | Direct evidence           |                           | Network meta-analysis  |                          |
|-------------|---------------------------|---------------------------|------------------------|--------------------------|
|             | Relative Risk<br>[95% CI] | Absolute Risk<br>[95% CI] | Odds Ratio<br>[95% CI] | Certainty of<br>Evidence |
| PTHR v PBO  | 0.97 [0.89, 1.06]         | -                         | -                      | LOW <sup>a,d</sup>       |
| SERM v PBO  | 1.00 [0.99, 1.00]         | -                         | -                      | LOW <sup>a,d</sup>       |
| Romo v PBO  | 0.99 [0.97, 1.01]         | -                         | -                      | LOW <sup>a,d</sup>       |
| PTHR v BP   | 0.94 [0.87, 1.01]         | -                         | -                      | LOW <sup>a,d</sup>       |
| Dmab v BP   | 0.98 [0.95, 1.02]         | -                         | -                      | LOW <sup>a,d</sup>       |
| Romo v BP   | 0.98 [0.96, 1.00]         | -                         | -                      | LOW <sup>a,d</sup>       |
| Romo v PTHR | 1.15 [1.00, 1.33]         | -                         | -                      | LOW <sup>a,d</sup>       |
| SERM v BP   | 1.01 [0.94, 1.09]         | -                         | -                      | LOW <sup>a,d</sup>       |
| BP v Dmab   | -                         | -                         | 1.09 [0.94, 1.26]      | LOW <sup>a,d</sup>       |
| BP v PBO    | 1.01 [1.00, 1.02]         | -                         | 1.11 [1.02, 1.20]      | LOW <sup>a,d</sup>       |
| BP v PTHR   | -                         | -                         | 1.19 [0.99, 1.44]      | LOW <sup>a,d</sup>       |
| BP v Romo   | -                         | -                         | 1.09 [0.91, 1.30]      | LOW <sup>a,d</sup>       |
| BP v SERM   | -                         | -                         | 1.07 [0.91, 1.25]      | LOW <sup>a,d</sup>       |
| Dmab v PBO  | 1.00 [0.98, 1.01]         | -                         | 1.02 [0.87, 1.19]      | LOW <sup>a,d</sup>       |
| Dmab v PTHR | -                         | -                         | 1.09 [0.86, 1.38]      | LOW <sup>a,d</sup>       |
| Dmab v Romo | -                         | -                         | 1.00 [0.80, 1.26]      | LOW <sup>a,d</sup>       |
| Dmab v SERM | -                         | -                         | 0.98 [0.80, 1.21]      | LOW <sup>a,d</sup>       |
| PBO v PTHR  | -                         | -                         | 1.07 [0.89, 1.30]      | LOW <sup>a,d</sup>       |
| PBO v Romo  | -                         | -                         | 0.98 [0.82, 1.18]      | LOW <sup>a,d</sup>       |
| PBO v SERM  | -                         | -                         | 0.97 [0.83, 1.12]      | LOW <sup>a,d</sup>       |
| PTHR v Romo | -                         | -                         | 0.92 [0.73, 1.16]      | LOW <sup>a,d</sup>       |
| PTHR v SERM | -                         | -                         | 0.90 [0.71, 1.14]      | LOW <sup>a,d</sup>       |
| Romo v SERM | -                         | -                         | 0.98 [0.78, 1.24]      | LOW <sup>a,d</sup>       |

Abbreviations: Bisphosphonates [BP], confidence interval [CI], denosumab [Dmab], parathyroid hormone receptor [PTHR] agonists, placebo [PBO], romosozumab [Romo], selective oestrogen receptor modulators [SERM].

<sup>a</sup> Downgraded due to serious risk of bias; <sup>b</sup> Downgraded due to serious risk of inconsistency; <sup>c</sup> Downgraded due to serious risk of indirectness; <sup>d</sup> Downgraded due to serious risk of imprecision; <sup>e</sup> Downgraded due to serious risk of publication bias.

Estimates of effects and quality ratings for comparison of drugs in relation to number of patients cardiovascular related serious adverse events

| Comparison  | Direct evidence           |                           | Network meta-analysis  |                          |
|-------------|---------------------------|---------------------------|------------------------|--------------------------|
|             | Relative Risk<br>[95% CI] | Absolute Risk<br>[95% CI] | Odds Ratio<br>[95% CI] | Certainty of<br>Evidence |
| SERM v PBO  | 1.03 [0.95, 1.11]         | -                         | -                      | LOW <sup>a,d</sup>       |
| Romo v PBO  | 1.04 [0.76, 1.41]         | -                         | -                      | LOW <sup>a,d</sup>       |
| PTHR v BP   | 0.74 [0.20, 2.69]         | -                         | -                      | LOW <sup>a,d</sup>       |
| Dmab v BP   | 1.24 [0.37, 4.23]         | -                         | -                      | LOW <sup>a,d</sup>       |
| Romo v BP   | 1.08 [0.85, 1.37]         | -                         | -                      | LOW <sup>a,d</sup>       |
| Romo v PTHR | 4.91 [0.24, 101.65]       | -                         | -                      | LOW <sup>a,d</sup>       |
| BP v Dmab   | -                         | -                         | 0.91 [0.67, 1.23]      | LOW <sup>a,d</sup>       |
| BP v PBO    | 0.91 [0.77, 1.09]         | -                         | 0.94 [0.76, 1.16]      | LOW <sup>a,d</sup>       |
| BP v PTHR   | -                         | -                         | 1.36 [0.71, 2.59]      | LOW <sup>a,d</sup>       |
| BP v Romo   | -                         | -                         | 0.91 [0.72, 1.15]      | LOW <sup>a,d</sup>       |
| BP v SERM   | -                         | -                         | 0.91 [0.72, 1.15]      | LOW <sup>a,d</sup>       |
| Dmab v PBO  | 0.98 [0.62, 1.53]         | -                         | 1.04 [0.83, 1.31]      | LOW <sup>a,d</sup>       |
| Dmab v PTHR | -                         | -                         | 1.50 [0.73, 3.05]      | LOW <sup>a,d</sup>       |
| Dmab v Romo | -                         | -                         | 1.01 [0.72, 1.41]      | LOW <sup>a,d</sup>       |
| Dmab v SERM | -                         | -                         | 1.00 [0.78, 1.29]      | LOW <sup>a,d</sup>       |
| PBO v PTHR  | -                         | -                         | 1.44 [0.73, 2.84]      | LOW <sup>a,d</sup>       |
| PBO v Romo  | -                         | -                         | 0.97 [0.75, 1.25]      | LOW <sup>a,d</sup>       |
| PBO v SERM  | -                         | -                         | 0.97 [0.87, 1.07]      | LOW <sup>a,d</sup>       |
| PTHR v Romo | -                         | -                         | 0.67 [0.34, 1.33]      | LOW <sup>a,d</sup>       |
| PTHR v SERM | -                         | -                         | 0.67 [0.34, 1.33]      | LOW <sup>a,d</sup>       |
| Romo v SERM | -                         | -                         | 1.00 [0.76, 1.32]      | LOW <sup>a,d</sup>       |

Abbreviations: Bisphosphonates [BP], confidence interval [CI], denosumab [Dmab], parathyroid hormone receptor [PTHR] agonists, placebo [PBO], romosozumab [Romo], selective oestrogen receptor modulators [SERM].

<sup>a</sup> Downgraded due to serious risk of bias; <sup>b</sup> Downgraded due to serious risk of inconsistency; <sup>c</sup> Downgraded due to serious risk of indirectness; <sup>d</sup> Downgraded due to serious risk of imprecision; <sup>e</sup> Downgraded due to serious risk of publication bias.

## S7 Table. Cochrane Risk of Bias tool 2

Risk of bias assessment as assessed by the Cochrane risk of bias tool 2. The specific type of bias is presented in the top column, and the individual studies in the left row. The tool includes the following domains on risk of bias: arising from the randomization process (D1), due to deviations from the intended interventions (D2), due to missing outcome data (D3), in measurement of the outcome (D4), and in selection of the reported result (D5).

The crib sheet for parallel trials was applied, and we aimed to assess the effect of assignment to the intervention. The risk of bias was assumed to be equivalent across different fracture site outcomes. Each of the domains was scored as 'high', 'low' or 'some concerns' in relation to risk of bias. An overall risk of bias judgement for each study was made. High risk of bias was given if there was high risk of bias in at least one domain, or if three or more domains were rated to have some concerns. Low risk of bias was given if there were low risk of bias in all domains, and some concerns was given, if there were some concerns in at least one domain, but not high risk of bias in any of the domains. The following sources were obtained to help inform the risk of bias assessment: journal article(s), conference abstract(s), trial protocol or trial registry record (e.g. clinicaltrials.gov) and was therefore exclusively based on published information.

| Study                    | D1            | D2            | D3            | D4  | D5            | Overall       |
|--------------------------|---------------|---------------|---------------|-----|---------------|---------------|
| Adachi 2009              | Low           | Low           | High          | Low | Some concerns | High          |
| Adami 2008               | High          | Some concerns | High          | Low | Some concerns | High          |
| Anastasilakis 2015       | Some concerns | High          | High          | Low | Some concerns | High          |
| Ascott Evans 2003        | Some concerns | Low           | High          | Low | Some concerns | High          |
| Bell 2002                | Some concerns | Low           | High          | Low | Some concerns | High          |
| Black 1996 (FIT 1)       | Some concerns | Low           | Low           | Low | Some concerns | Some concerns |
| Black 2007 (HORIZON PFT) | Some concerns | Low           | Low           | Low | Some concerns | Some concerns |
| Bock 2012                | Low           | Low           | Low           | Low | Some concerns | Some concerns |
| Body 2002                | Some concerns | Low           | Low           | Low | Some concerns | Some concerns |
| Bone 1997                | Some concerns | Low           | Some concerns | Low | Some concerns | High          |
| Bone 2000                | Some concerns | Low           | Some concerns | Low | Some concerns | High          |
| Brown 2009 (DECIDE)      | Some concerns | Low           | Some concerns | Low | Some concerns | Some concerns |
| Chesnut 2004 (BONE)      | Some concerns | Low           | Some concerns | Low | Some concerns | High          |
| Clemmesen 1997           | Some concerns | Low           | High          | Low | Some concerns | High          |
| Cosman 2001              | Low           | Some concerns | High          | Low | Some concerns | High          |
| Cosman 2005              | Some concerns | Some concerns | Some concerns | Low | Some concerns | High          |

| Study                     | D1            | D2            | D3            | D4            | D5            | Overall       |
|---------------------------|---------------|---------------|---------------|---------------|---------------|---------------|
| Cosman 2009               | Some concerns | Some concerns | Some concerns | Low           | Some concerns | High          |
| Cosman 2011               | Some concerns | Low           | Some concerns | Low           | Some concerns | High          |
| Cosman 2016 (FRAME)       | Low           | Low           | Low           | Low           | Low           | Low           |
| Cummings 1998 (FIT 2)     | Low           | Low           | Some concerns | Low           | Some concerns | Some concerns |
| Cummings 2009 (FREEDOM)   | Some concerns | Some concerns | High          | Low           | Low           | High          |
| DownsJr 2000              | Some concerns | Low           | High          | Low           | Some concerns | High          |
| Dursun 2001               | Some concerns | High          | High          | Low           | Some concerns | High          |
| Ensrud 2008 (RUTH)        | Some concerns | Low           | High          | Low           | Some concerns | High          |
| Ettinger 1999 (MORE)      | Low           | Low           | Some concerns | Low           | Some concerns | Some concerns |
| Fogelman 2000             | Some concerns | Low           | High          | Low           | Some concerns | High          |
| Freemantle 2012 (DAPS)    | Some concerns | Some concerns | Low           | Low           | Some concerns | High          |
| Galesanu 2018             | Some concerns | High          | High          | Some concerns | Some concerns | High          |
| Geusens 2018 (VERO)       | Some concerns | Some concerns | High          | Low           | High          | High          |
| Greenspan 1998            | Some concerns | Low           | High          | Low           | Some concerns | High          |
| Greenspan 2003            | Low           | Low           | Low           | Low           | Some concerns | Some concerns |
| Greenspan 2015 (ZEST)     | Some concerns | Low           | Low           | Low           | Some concerns | Some concerns |
| Grey 2009                 | Some concerns | Low           | Low           | Low           | Low           | Some concerns |
| Grey 2012                 | Low           | Low           | Low           | Low           | Some concerns | Some concerns |
| Hadji 2012                | Some concerns | Low           | Some concerns | Low           | Some concerns | High          |
| Harris 1999 (VERT USA)    | Some concerns | Low           | Low           | Low           | Some concerns | Some concerns |
| Hooper 2005               | Some concerns | Low           | Low           | Low           | Some concerns | Some concerns |
| Hosking 1998 (EPIC)       | Some concerns | Low           | Low           | Low           | Some concerns | Some concerns |
| Hosking 2003              | Low           | Low           | Low           | Low           | Some concerns | Some concerns |
| Kendler 2010 (STAND)      | Some concerns | Low           | Low           | Low           | Some concerns | Some concerns |
| Langdahl 2017 (STRUCTURE) | Low           | Some concerns | Some concerns | Low           | Some concerns | High          |
| Lewiecki 2007 (AMG BONE)  | Some concerns | High          | High          | Low           | Some concerns | High          |
| Lindsay 1997              | Some concerns | Some concerns | Low           | Low           | Some concerns | High          |

| Study                    | D1            | D2            | D3            | D4  | D5            | Overall       |
|--------------------------|---------------|---------------|---------------|-----|---------------|---------------|
| Lufkin 1998              | Some concerns | Low           | High          | Low | Some concerns | High          |
| Malouf-Sierra 2017       | Some concerns | Low           | Low           | Low | Some concerns | Some concerns |
| McClung 2001 (HIP)       | Some concerns | Low           | Some concerns | Low | Some concerns | High          |
| McClung 2005             | Some concerns | Low           | Some concerns | Low | Some concerns | Some concerns |
| McClung 2009             | Some concerns | Low           | High          | Low | Some concerns | High          |
| McClung 2014             | Some concerns | Low           | Low           | Low | Some concerns | Some concerns |
| Miller 2008              | Low           | Low           | Some concerns | Low | Some concerns | Some concerns |
| Miller 2016_x            | Low           | Some concerns | Low           | Low | Low           | Some concerns |
| Miller 2016_y (ACTIVE)   | Some concerns | Low           | Low           | Low | Low           | Some concerns |
| Mortensen 1998           | Some concerns | Low           | Some concerns | Low | Some concerns | High          |
| Muscoso 2004             | Some concerns | Some concerns | Low           | Low | Some concerns | High          |
| Neer 2001 (FPT)          | Some concerns | Low           | Low           | Low | Some concerns | Some concerns |
| Panico 2011              | Some concerns | High          | High          | Low | Some concerns | High          |
| Pols 1999 (FOSIT)        | Some concerns | Low           | High          | Low | Some concerns | High          |
| Recker 2004 (IBAN IV)    | Some concerns | Low           | High          | Low | Some concerns | High          |
| Recker 2007 (EVA)        | Low           | Low           | Some concerns | Low | Some concerns | Some concerns |
| Recknor 2013             | Low           | Low           | High          | Low | Some concerns | High          |
| Reginster 2000 (VERT EU) | Some concerns | Low           | Some concerns | Low | Some concerns | High          |
| Reginster 2003           | Some concerns | Low           | Low           | Low | Some concerns | Some concerns |
| Reid 2002                | Some concerns | Low           | High          | Low | Some concerns | High          |
| Reid 2004                | Some concerns | Low           | Some concerns | Low | Some concerns | High          |
| Reid 2018                | Low           | Low           | Low           | Low | Low           | Low           |
| Roux 2014                | Some concerns | Low           | Low           | Low | Some concerns | Some concerns |
| Sambrook 2004 (EFFECT)   | Some concerns | Low           | Some concerns | Low | Some concerns | High          |
| Silverman 2008           | Some concerns | Low           | Some concerns | Low | Some concerns | Some concerns |
| Saag 2017 (ARCH)         | Low           | Low           | High          | Low | Low           | High          |
| Tucci 1996 (Lieberman)   | Some concerns | Low           | Low           | Low | Some concerns | Low           |
|                          | Some concerns | Low           | High          | Low | Some concerns | High          |

| <b>Study</b> | <b>D1</b>     | <b>D2</b> | <b>D3</b> | <b>D4</b> | <b>D5</b>     | <b>Overall</b> |
|--------------|---------------|-----------|-----------|-----------|---------------|----------------|
| Välmaki 2007 | Some concerns | Low       | Low       | Low       | Some concerns | Some concerns  |

## S2 Fig. Forest Plots

### Forest plot of risk ratio on clinical fractures comparing treatment to placebo

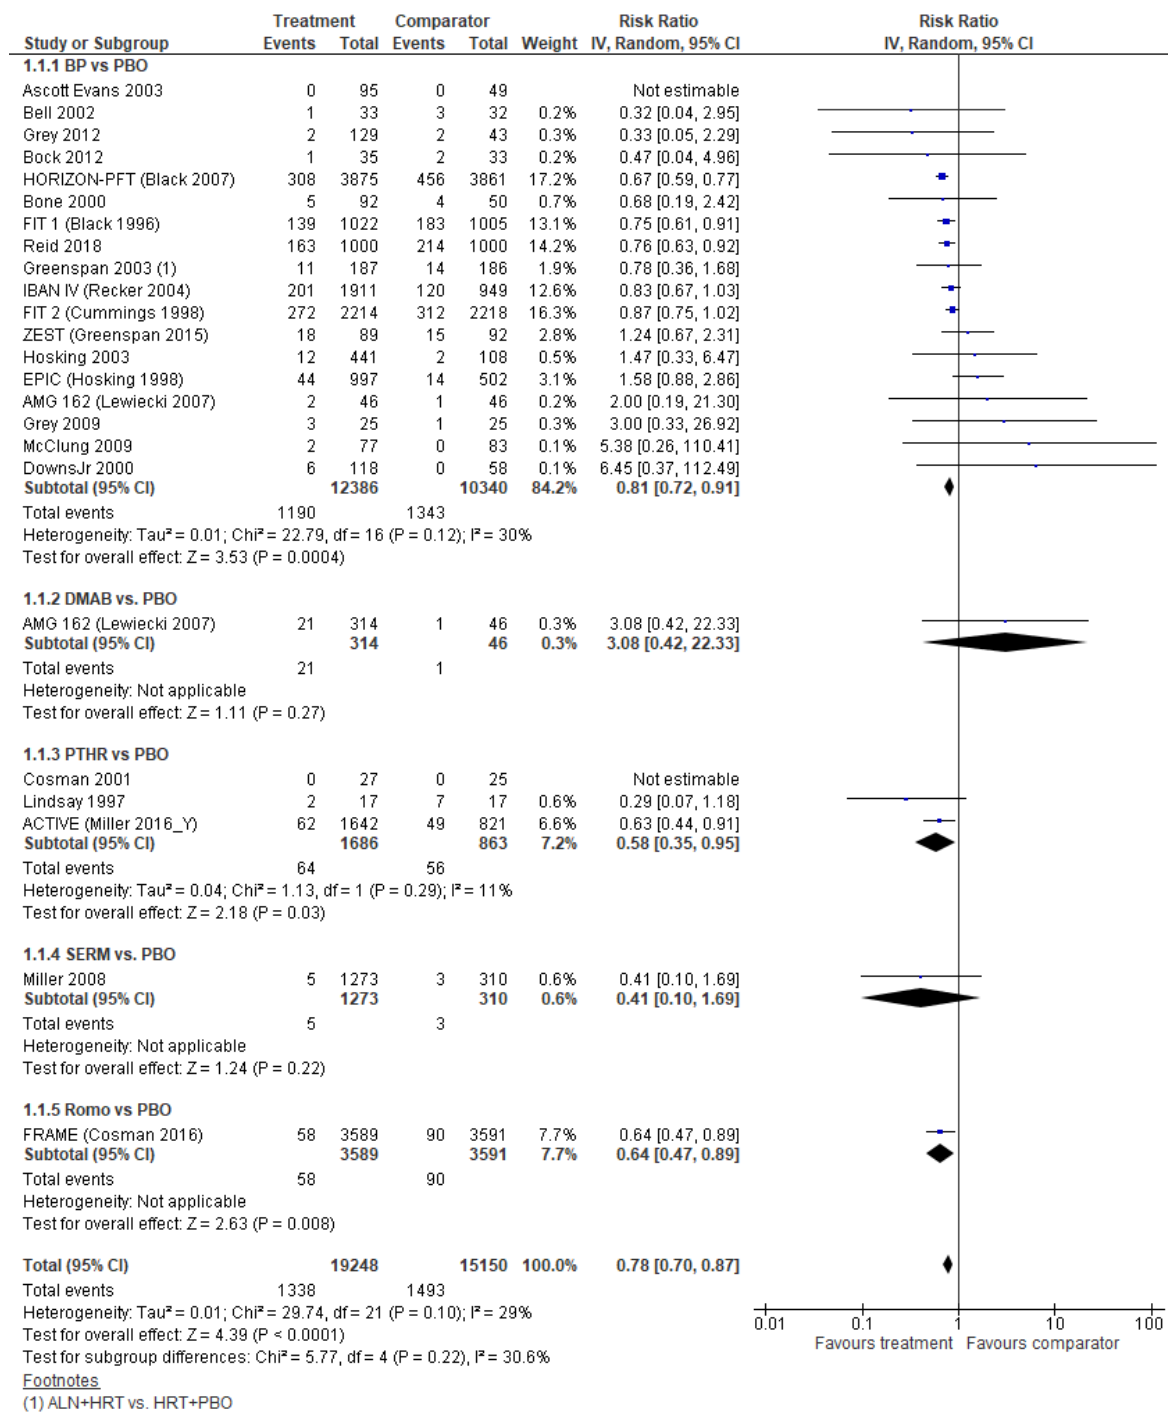

Abbreviations: Bisphosphonates [BP], denosumab [DMAB], parathyroid hormone receptor [PTHr] agonists, placebo [PBO], romosozumab [Romo], selective oestrogen receptor modulators [SERM], confidence interval [CI].

## Forest plot of risk ratio on clinical fractures comparing treatment to other treatments

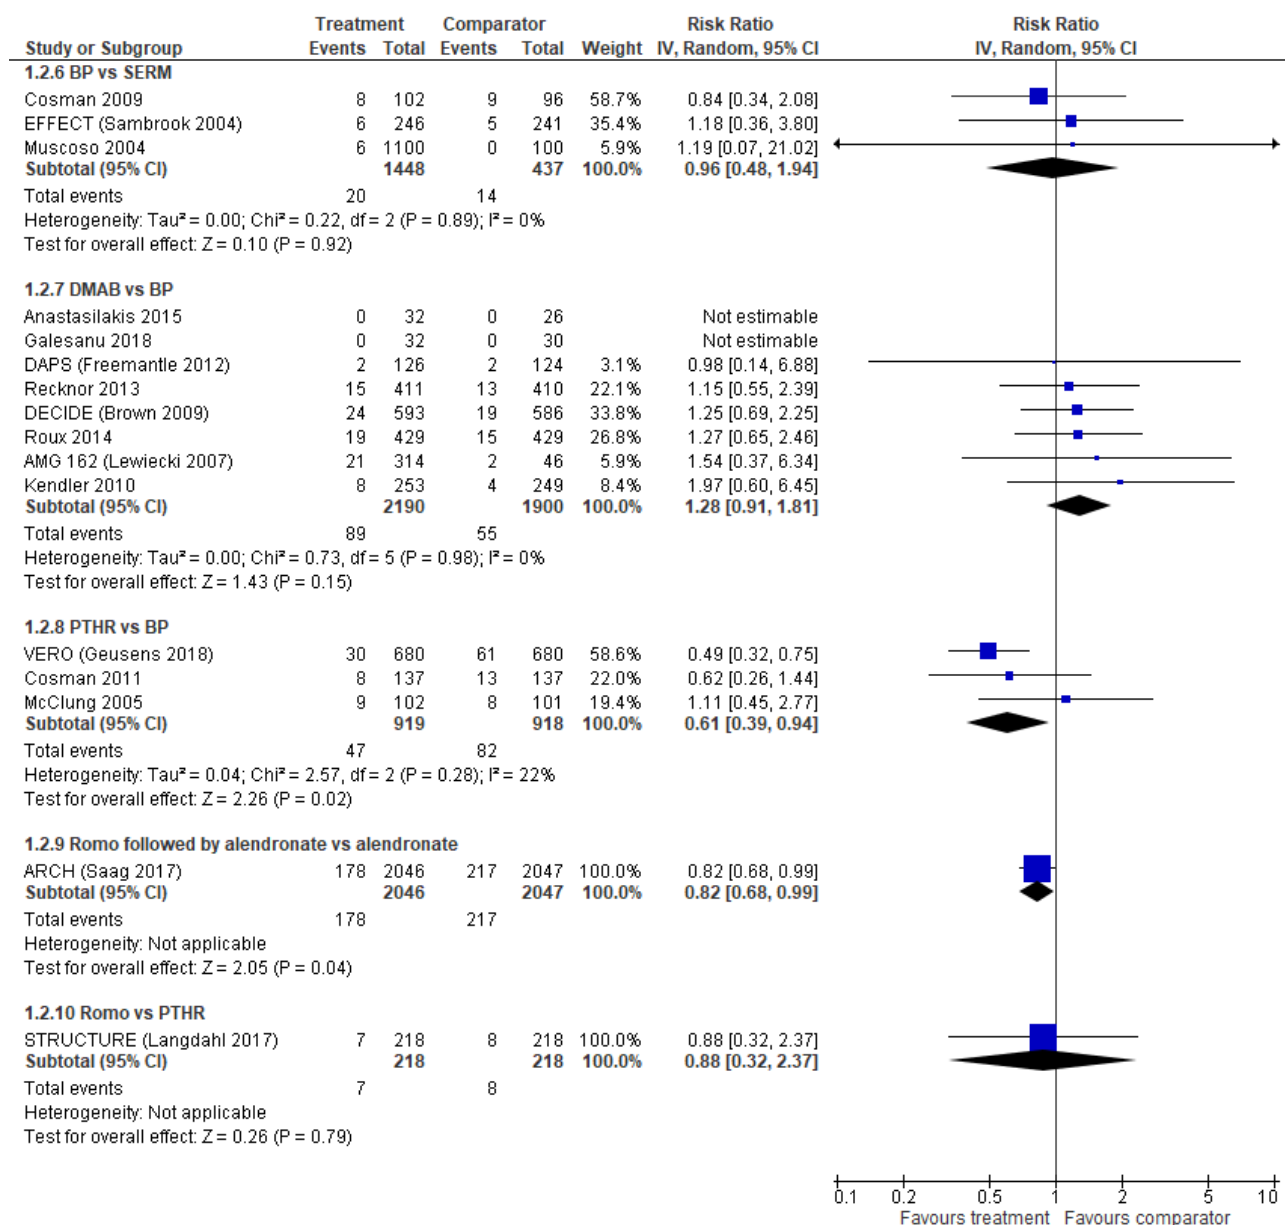

Abbreviations: Bisphosphonates [BP], denosumab [DMAB], parathyroid hormone receptor [PTHr] agonists, romosozumab [Romo], selective oestrogen receptor modulators [SERM], confidence interval [CI].



## Forest plot of risk ratio on vertebral fractures comparing treatment to placebo

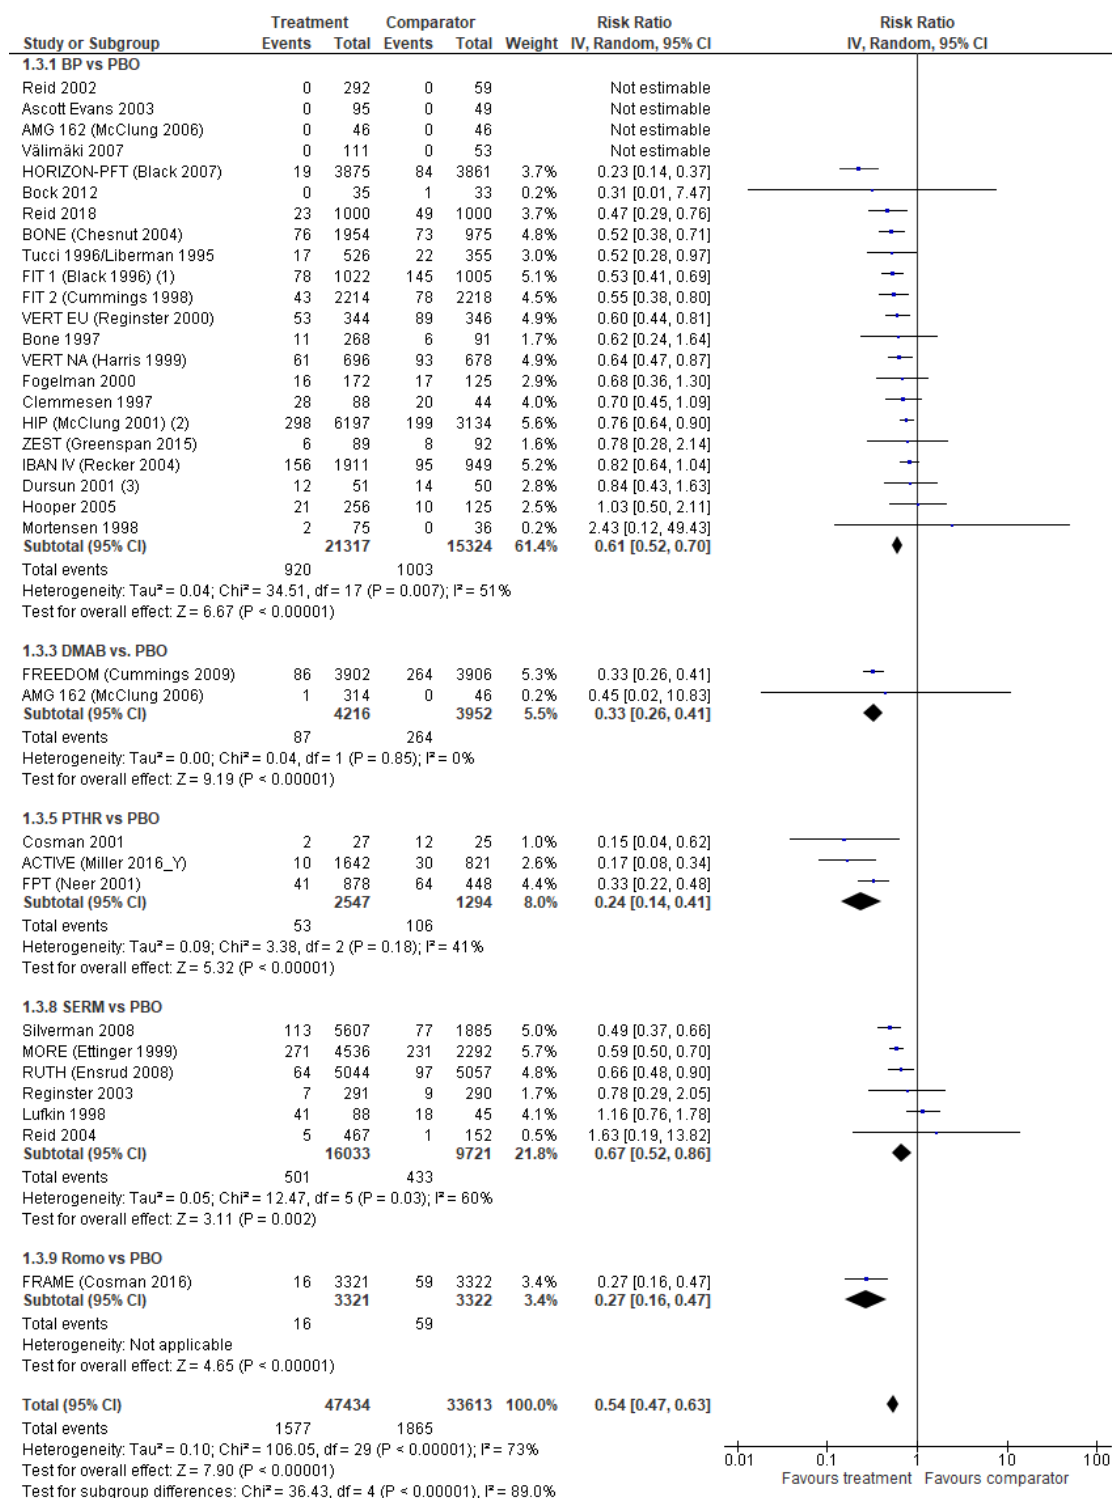

### Footnotes

- (1) Vertebral secondary
- (2) Estimates extracted from Eastell 2021
- (3) Vertebral secondary

Abbreviations: Bisphosphonates [BP], denosumab [DMAB], parathyroid hormone receptor [PTHr] agonists, placebo [PBO], romosozumab [Romo], selective oestrogen receptor modulators [SERM], confidence interval [CI].

## Forest plot of risk ratio on vertebral fractures comparing treatment to other treatments

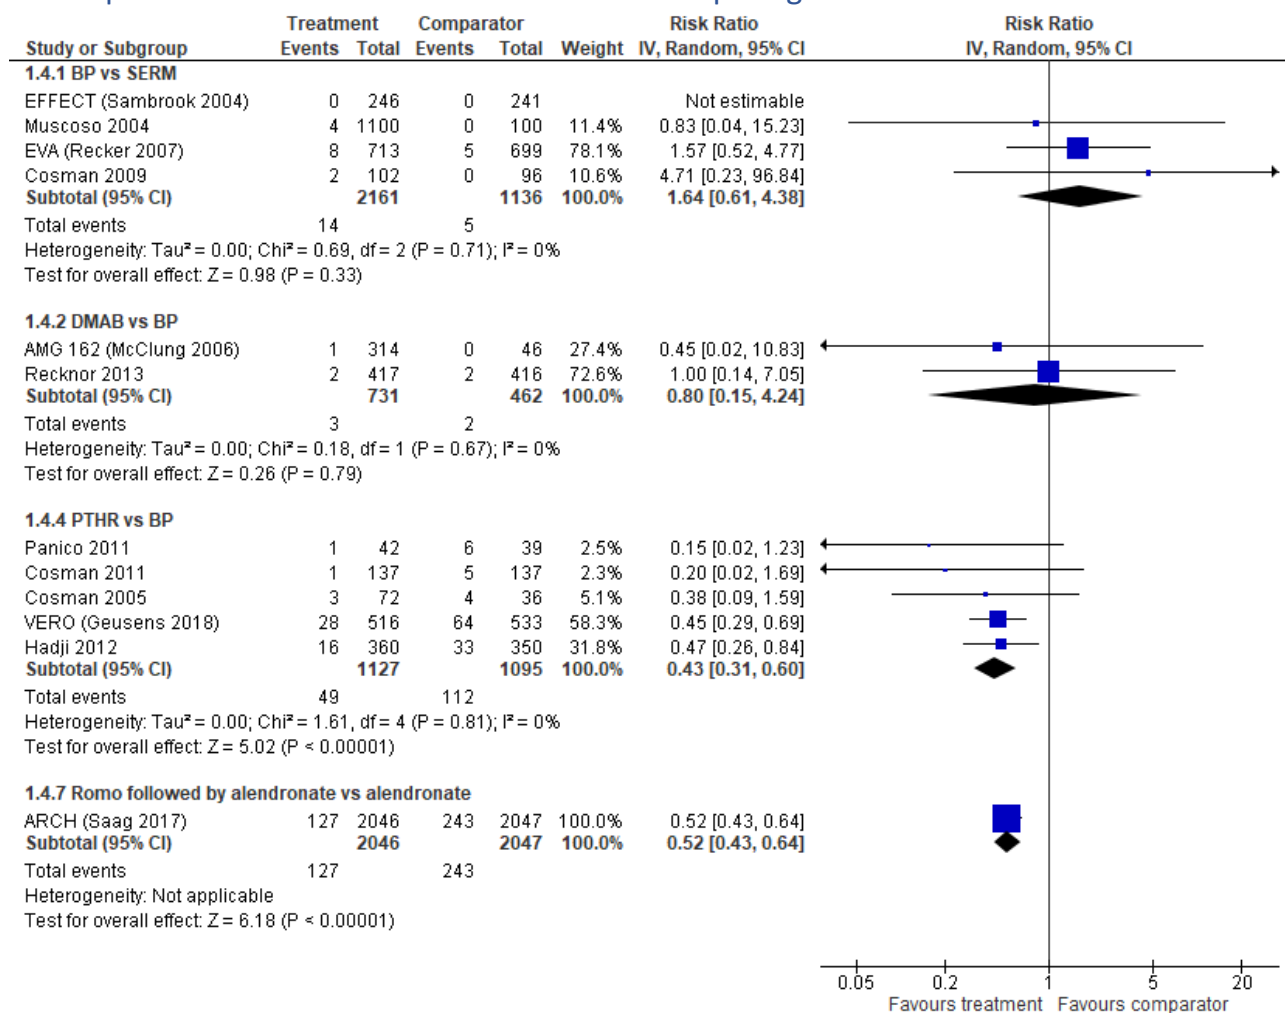

Abbreviations: Bisphosphonates [BP], denosumab [DMAB], parathyroid hormone receptor [PTHr] agonists, romosozumab [Romo], selective oestrogen receptor modulators [SERM], confidence interval [CI].

## Forest plot of risk ratio on non-vertebral fractures comparing treatment to placebo

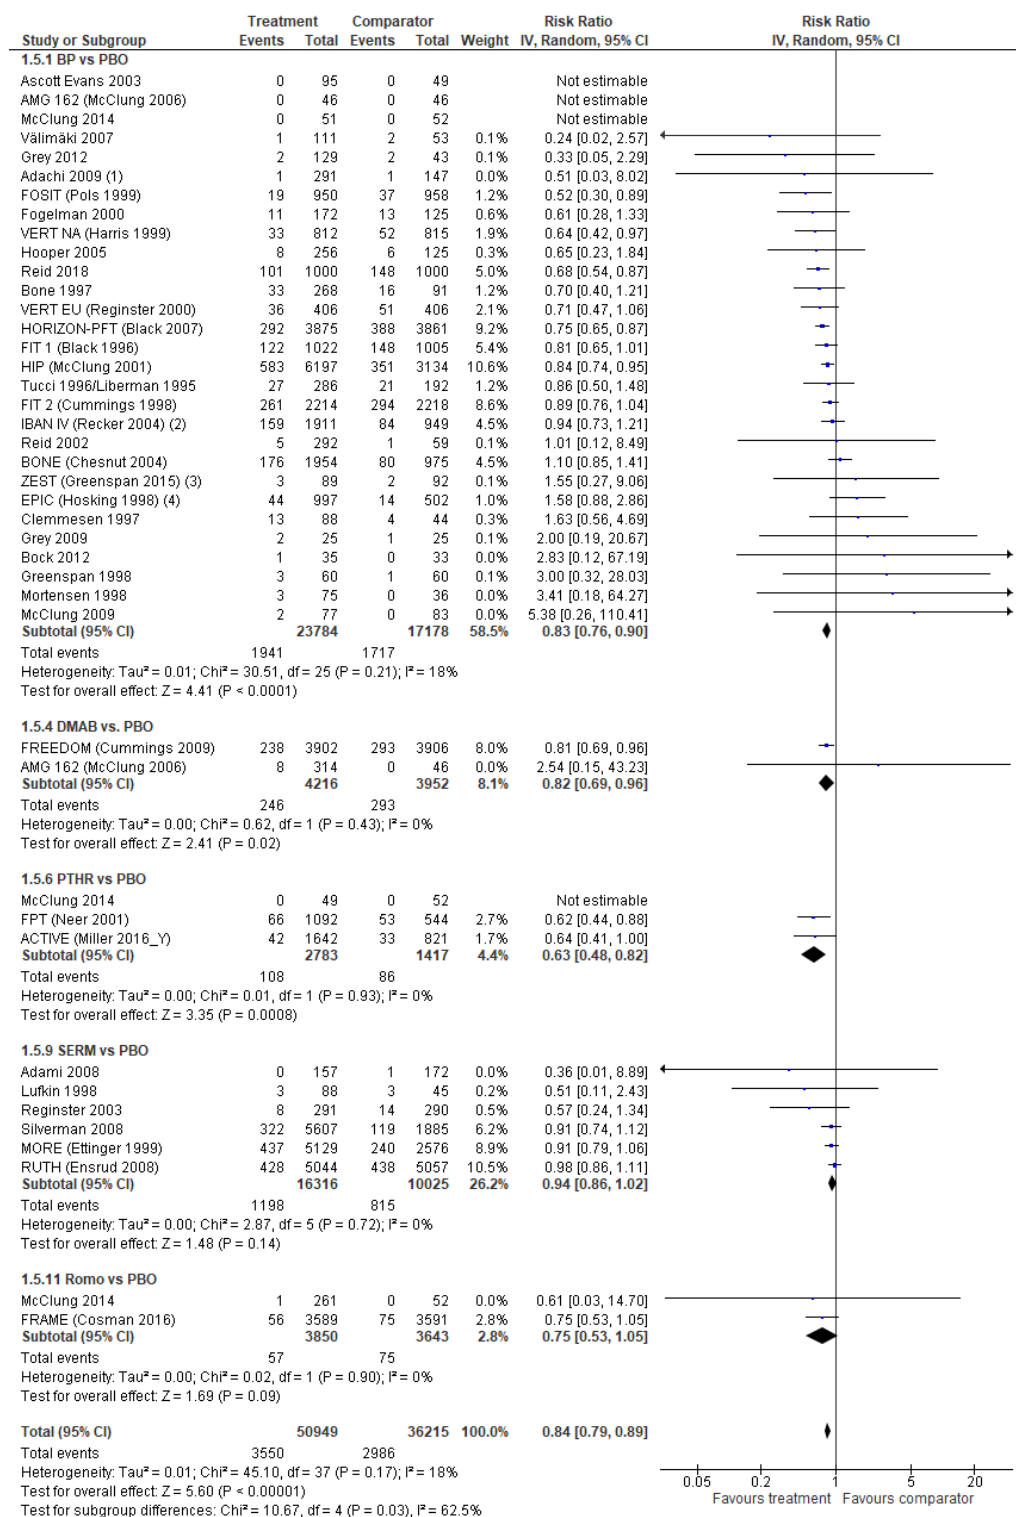

### Footnotes

- (1) Wrist fractures only
- (2) Estimates extracted from Eastell 2021
- (3) Estimates extracted from clinicaltrial.gov
- (4) ALN 5 mg

Abbreviations: Bisphosphonates [BP], denosumab [DMAB], parathyroid hormone receptor [PTHr] agonists, placebo [PBO], romosozumab [Romo], selective oestrogen receptor modulators [SERM], confidence interval [CI].

## Forest plot of risk ratio on non-vertebral fractures comparing treatment to other treatments

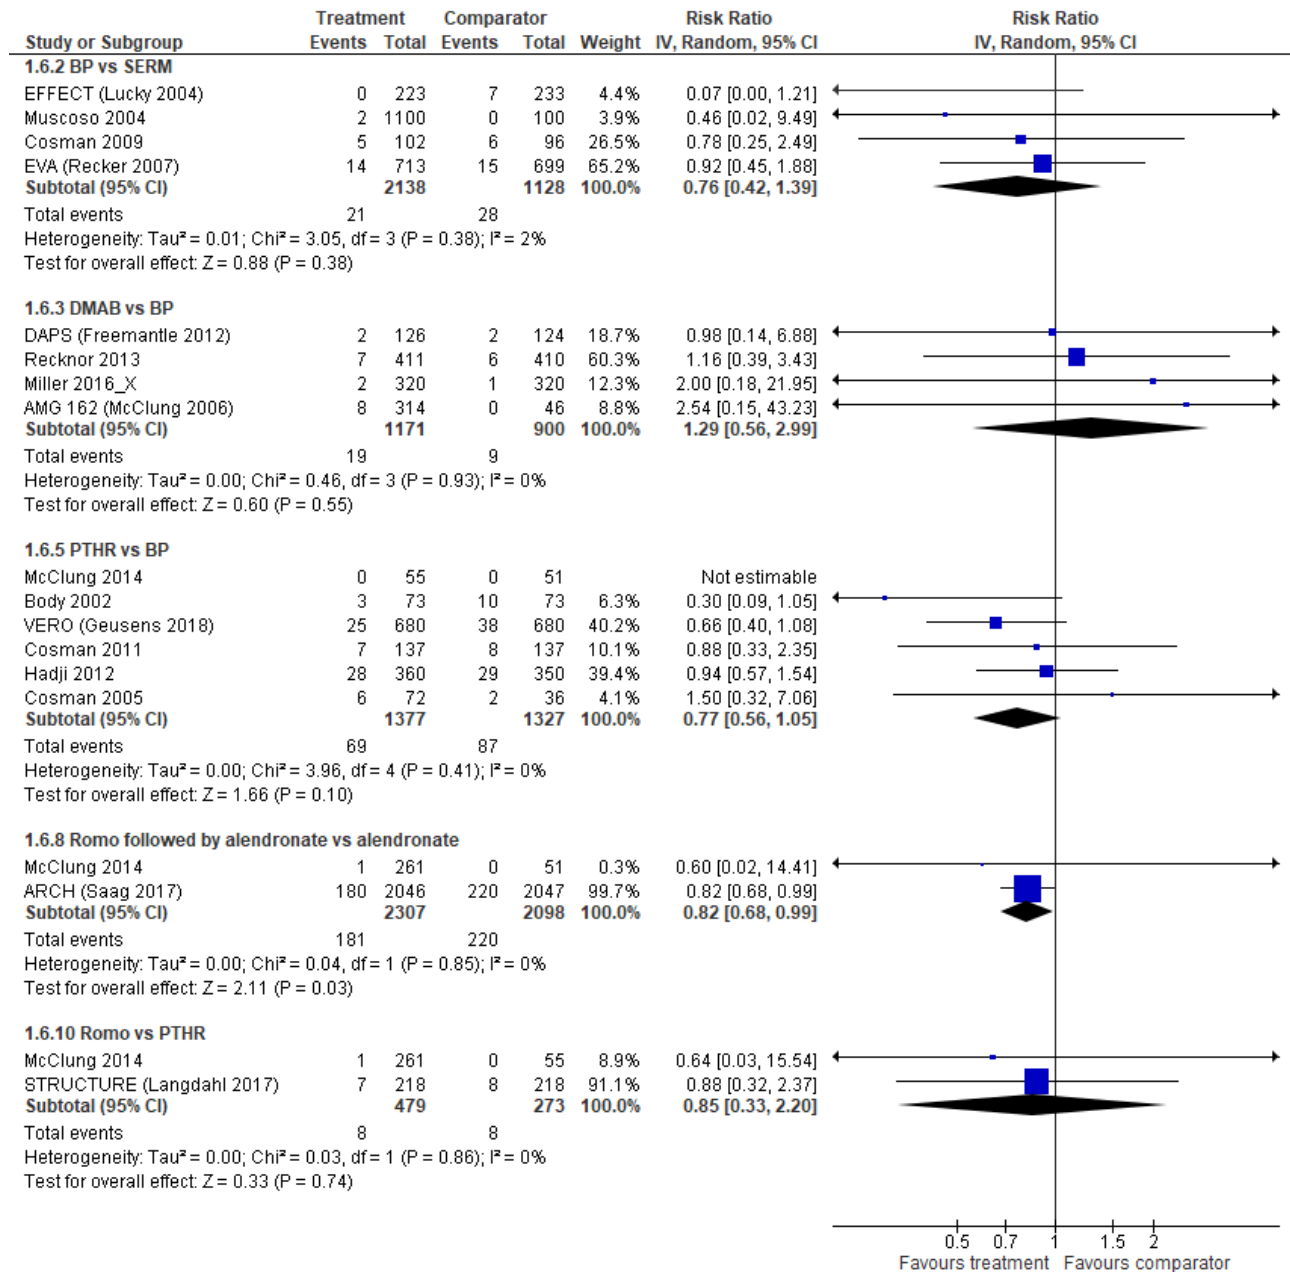

Abbreviations: Bisphosphonates [BP], denosumab [DMAB], parathyroid hormone receptor [PTHr] agonists, romosozumab [Romo], selective oestrogen receptor modulators [SERM], confidence interval [CI].

## Forest plot of risk ratio on hip fractures comparing treatment to placebo

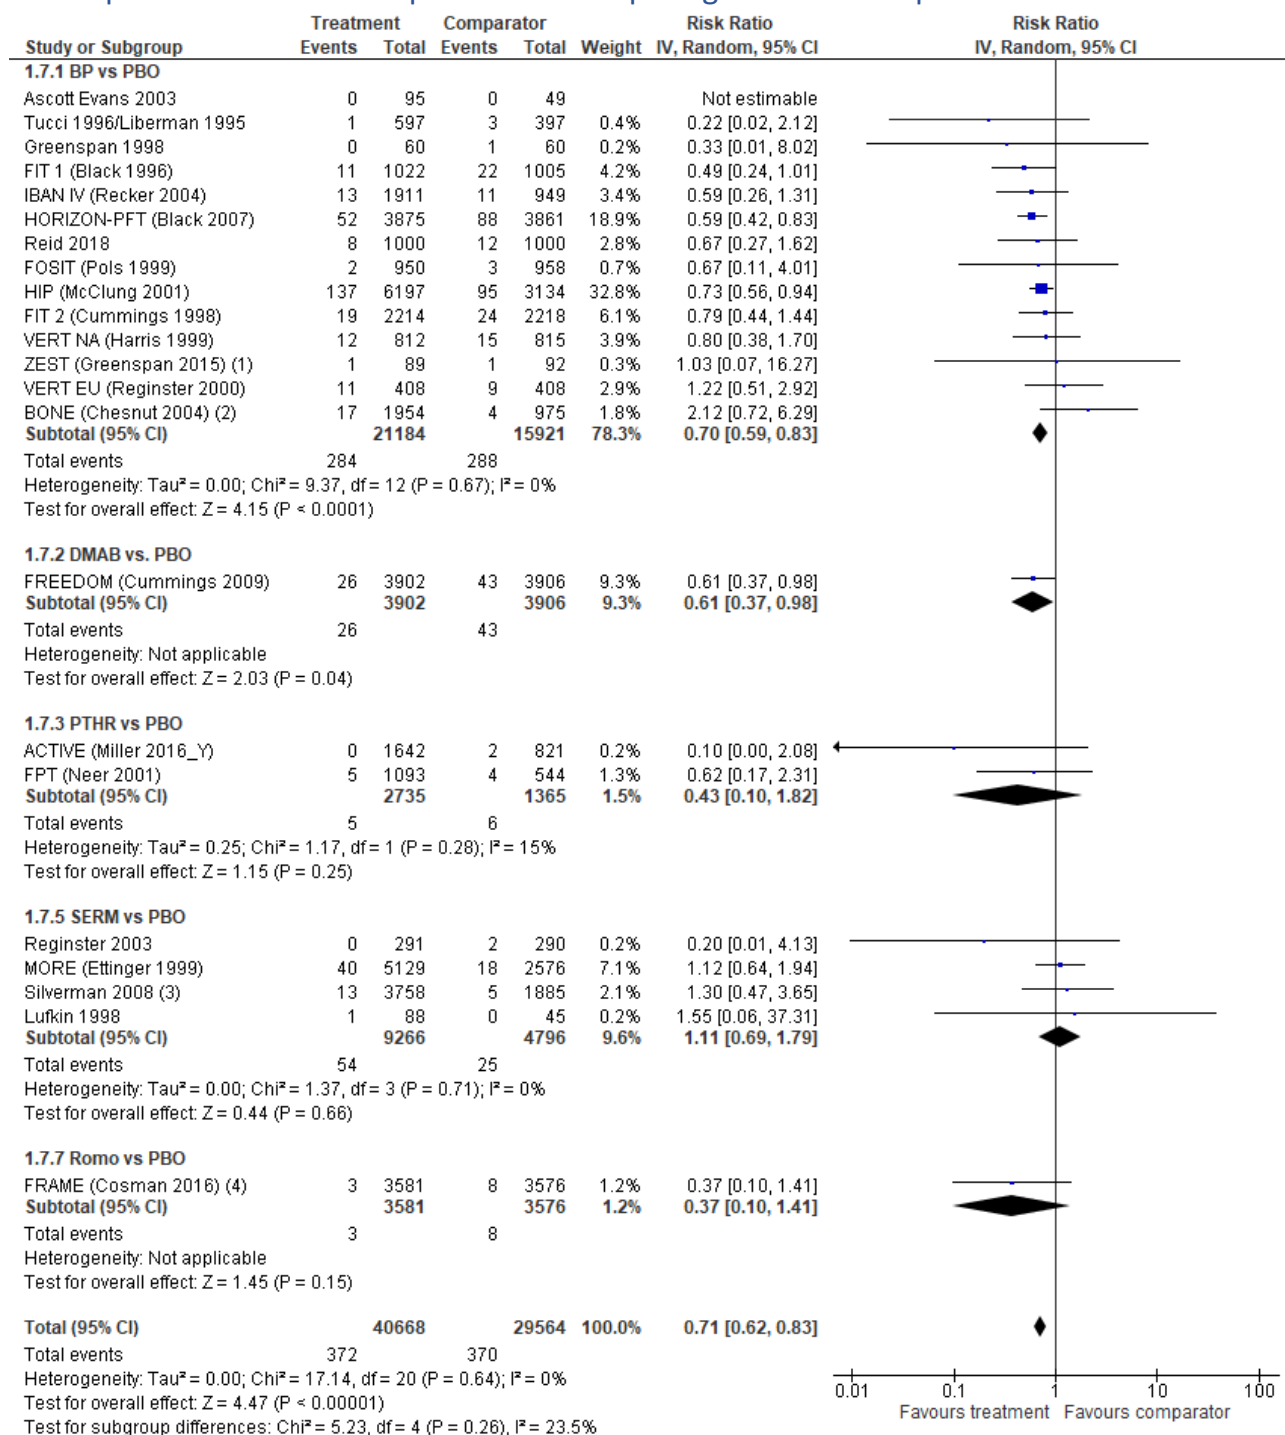

### Footnotes

(1) Estimates extracted from clinicaltrial.gov

(2) Estimates extracted from Eastell 2021

(3) Estimates extracted from Eastell 2021

(4) Estimates extracted from clinicaltrial.gov

Abbreviations: Bisphosphonates [BP], denosumab [DMAB], parathyroid hormone receptor [PTHR] agonists, placebo [PBO], romosozumab [Romo], selective oestrogen receptor modulators [SERM], confidence interval [CI]. Forest plot of risk ratio on hip fractures comparing treatment to other treatments

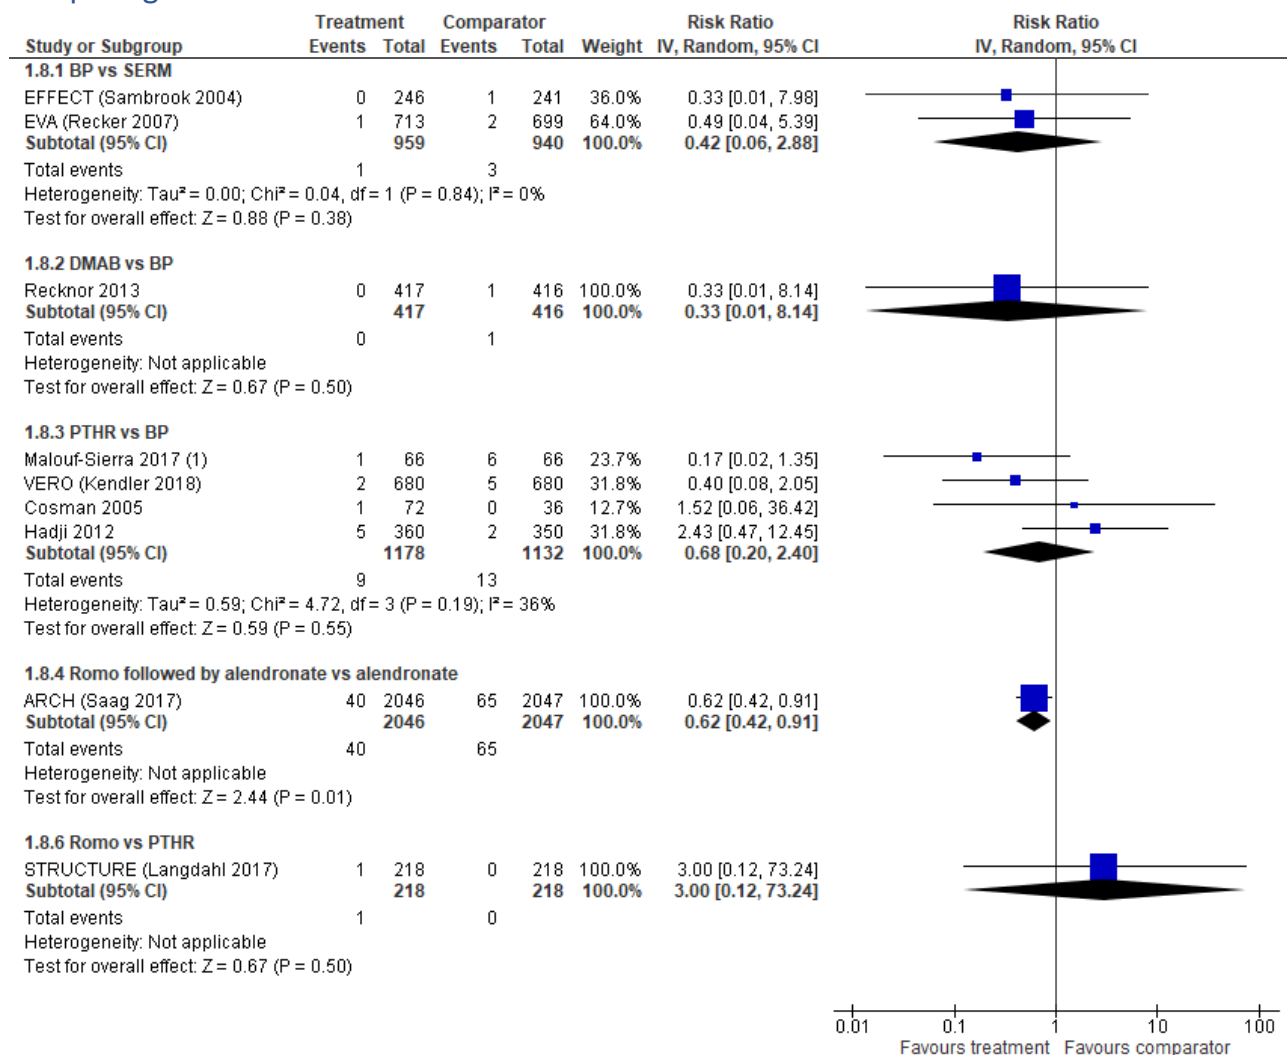

**Footnotes**

(1) Data on women only obtained from the authors

Abbreviations: Bisphosphonates [BP], denosumab [DMAB], parathyroid hormone receptor [PTHR] agonists, romosozumab [Romo], selective oestrogen receptor modulators [SERM], confidence interval [CI].

## Forest plot of risk ratio on major osteoporotic fractures comparing treatment to placebo

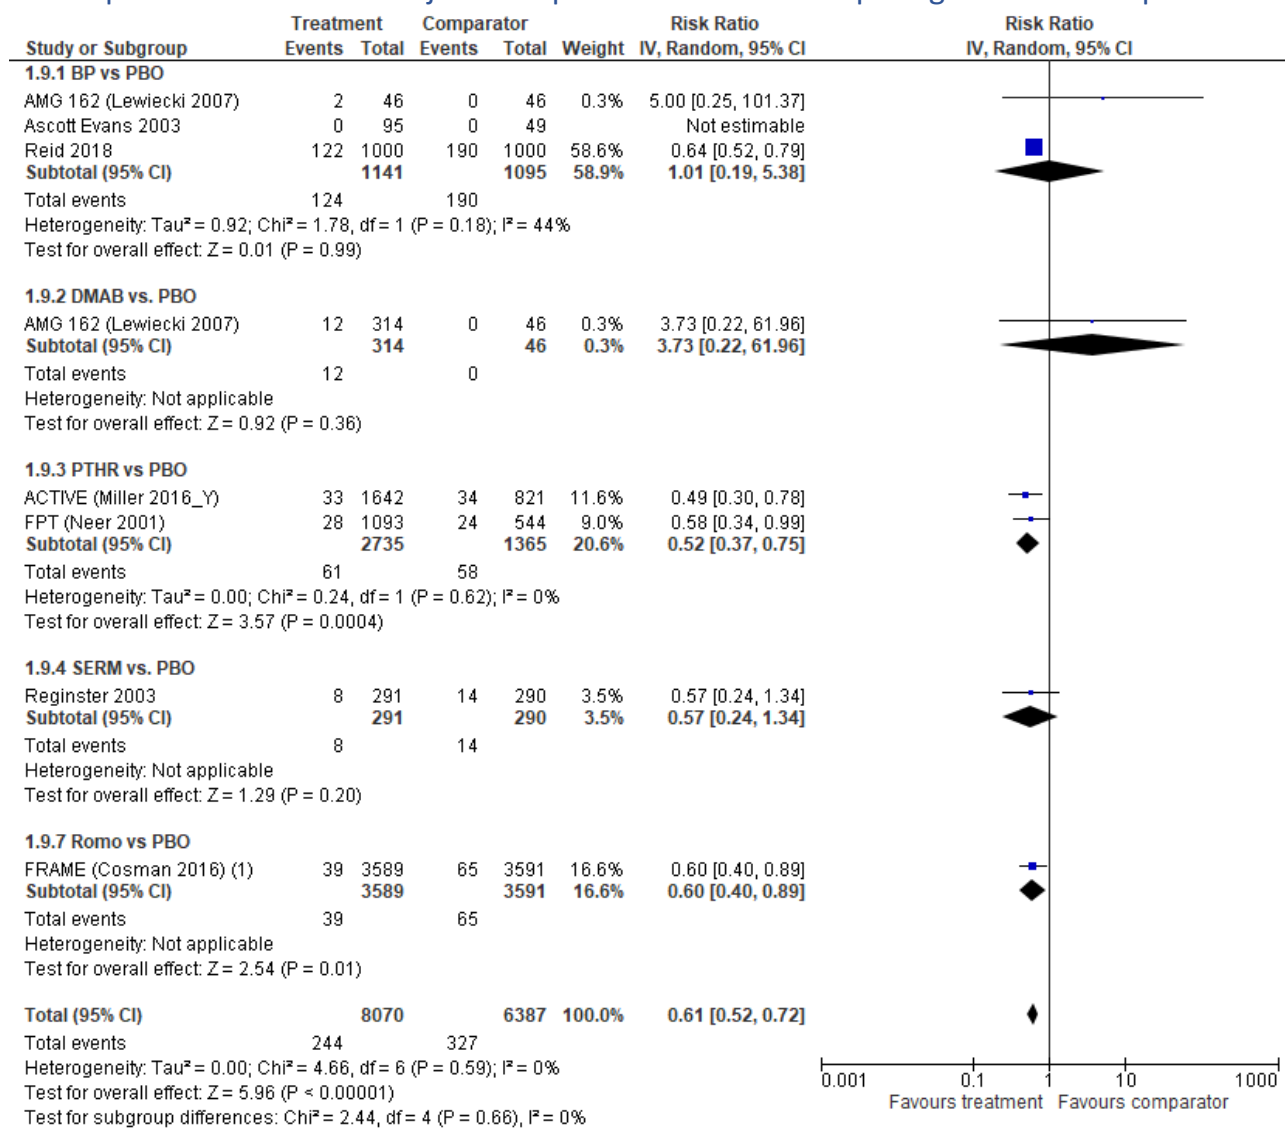

### Footnotes

(1) Estimates extracted from clinicaltrial.gov

Abbreviations: Bisphosphonates [BP], denosumab [DMAB], parathyroid hormone receptor [PTHr] agonists, placebo [PBO], romosozumab [Romo], selective oestrogen receptor modulators [SERM], confidence interval [CI].

## Forest plot of risk ratio on major osteoporotic fractures comparing treatment to other treatments

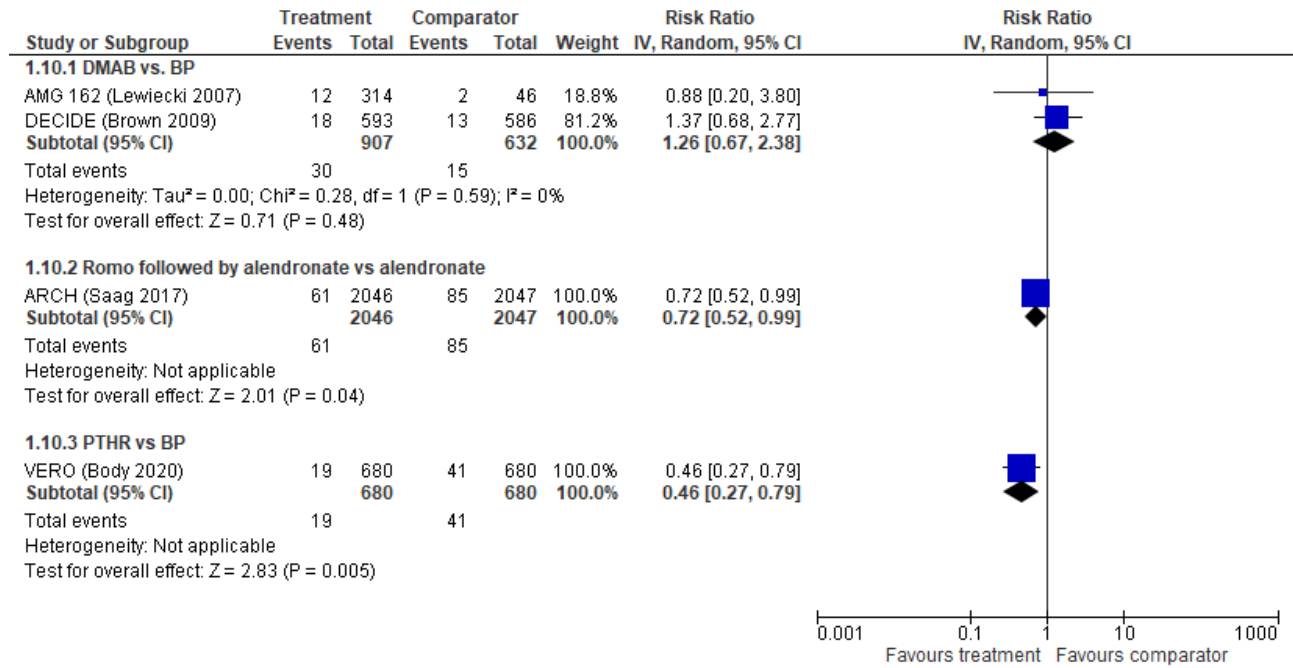

Abbreviations: Bisphosphonates [BP], denosumab [DMAB], parathyroid hormone receptor [PTHr] agonists, romosozumab [Romo], selective oestrogen receptor modulators [SERM], confidence interval [CI].



## Forest plot of risk ratio on all-cause mortality comparing treatment to placebo

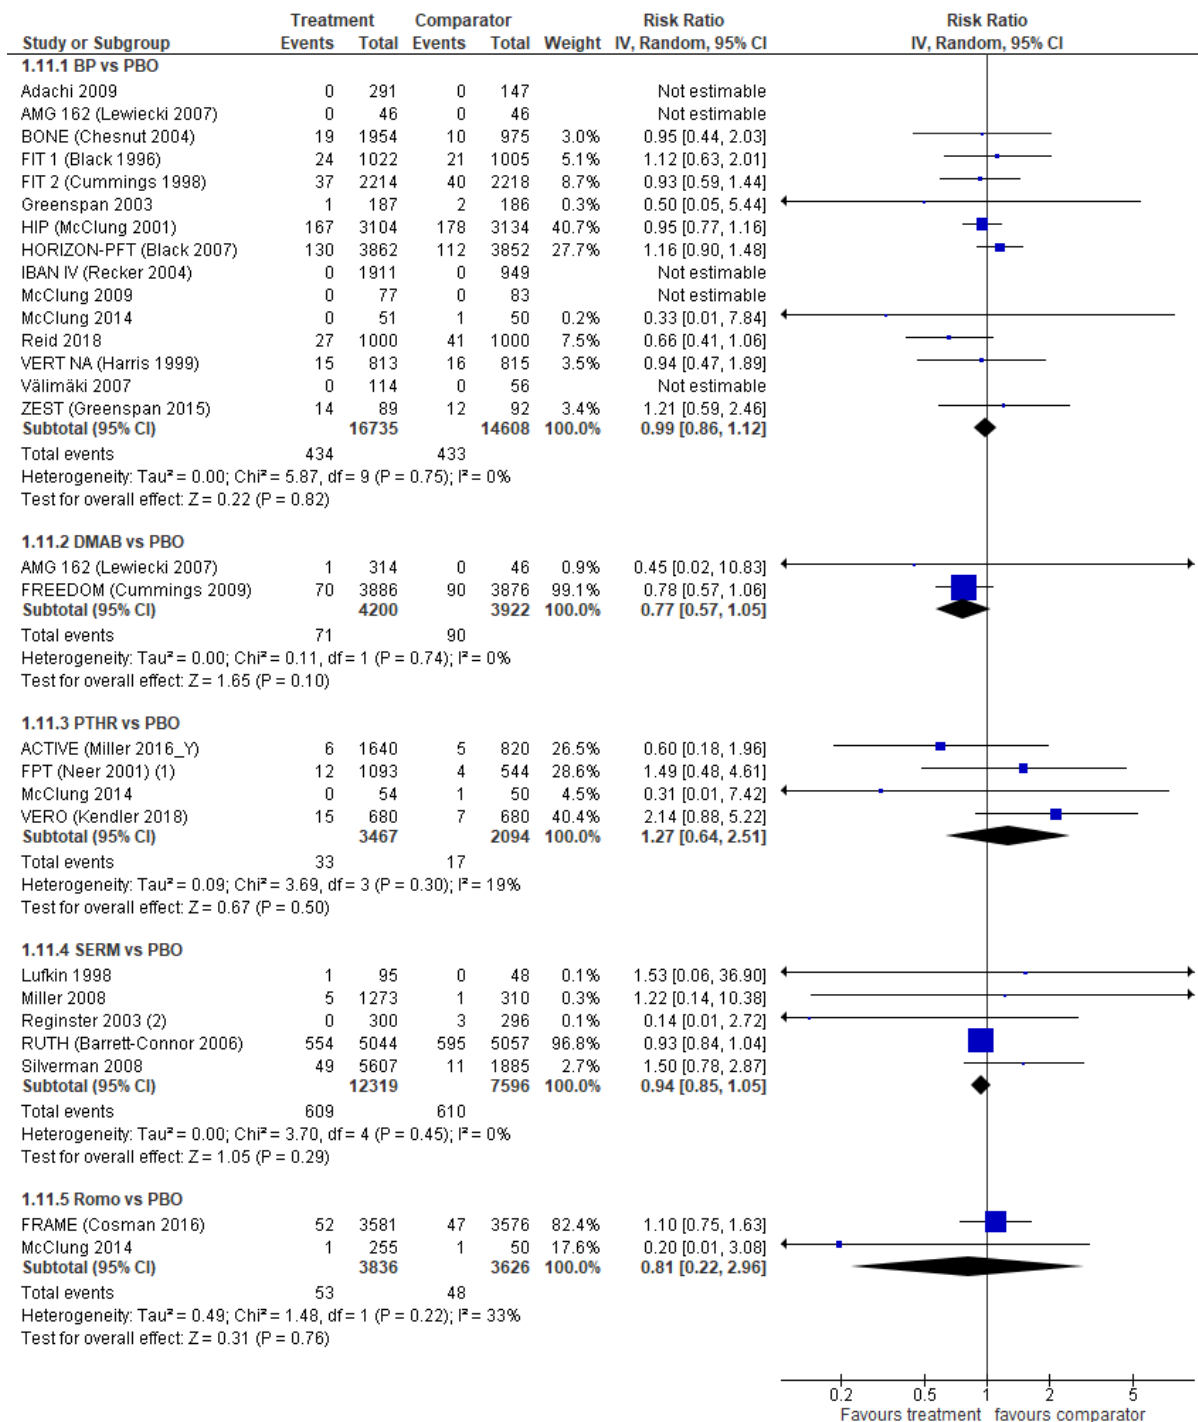

### Footnotes

(1) Extracted from Cummings 2019

(2) Discontinued study due to death

Abbreviations: Bisphosphonates [BP], denosumab [DMAB], parathyroid hormone receptor [PTHr] agonists, placebo [PBO], romosozumab [Romo], selective oestrogen receptor modulators [SERM], confidence interval [CI].

## Forest plot of risk ratio on all-cause mortality comparing treatment to other treatments

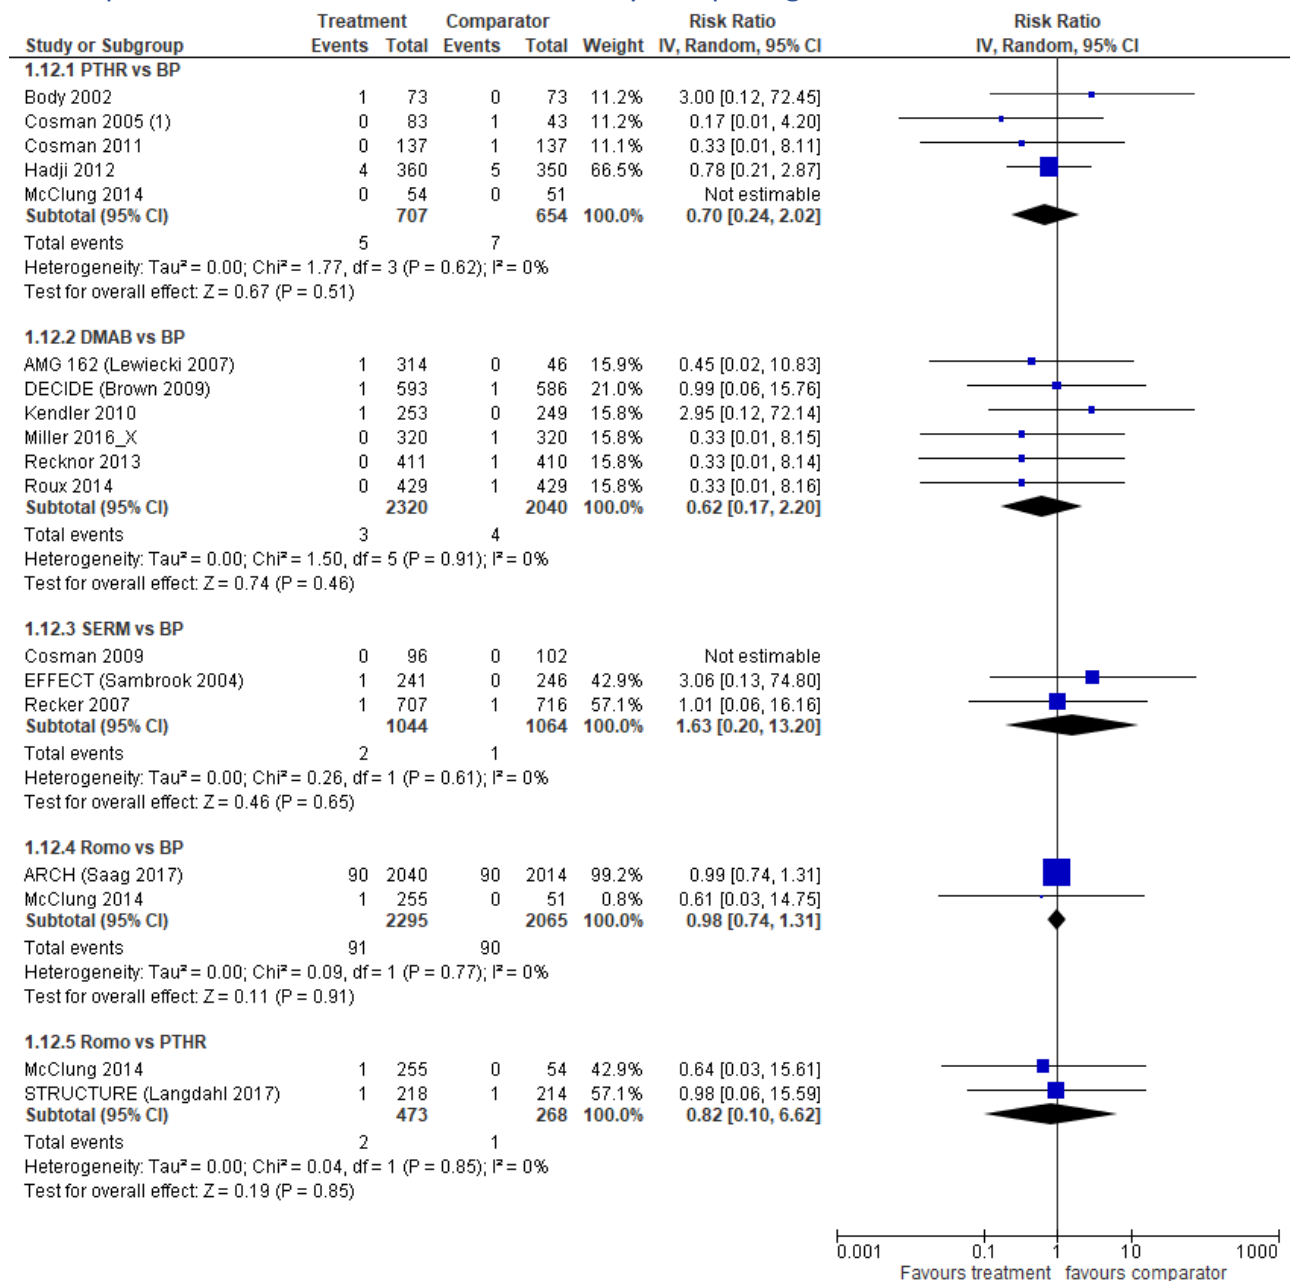

### Footnotes

(1) Death from complications of aortic-valve surgery

Abbreviations: Bisphosphonates [BP], denosumab [DMAB], parathyroid hormone receptor [PTHr] agonists, romosozumab [Romo], selective oestrogen receptor modulators [SERM], confidence interval [CI].

## Forest plot of risk ratio on number of patients with any adverse events comparing treatment to placebo

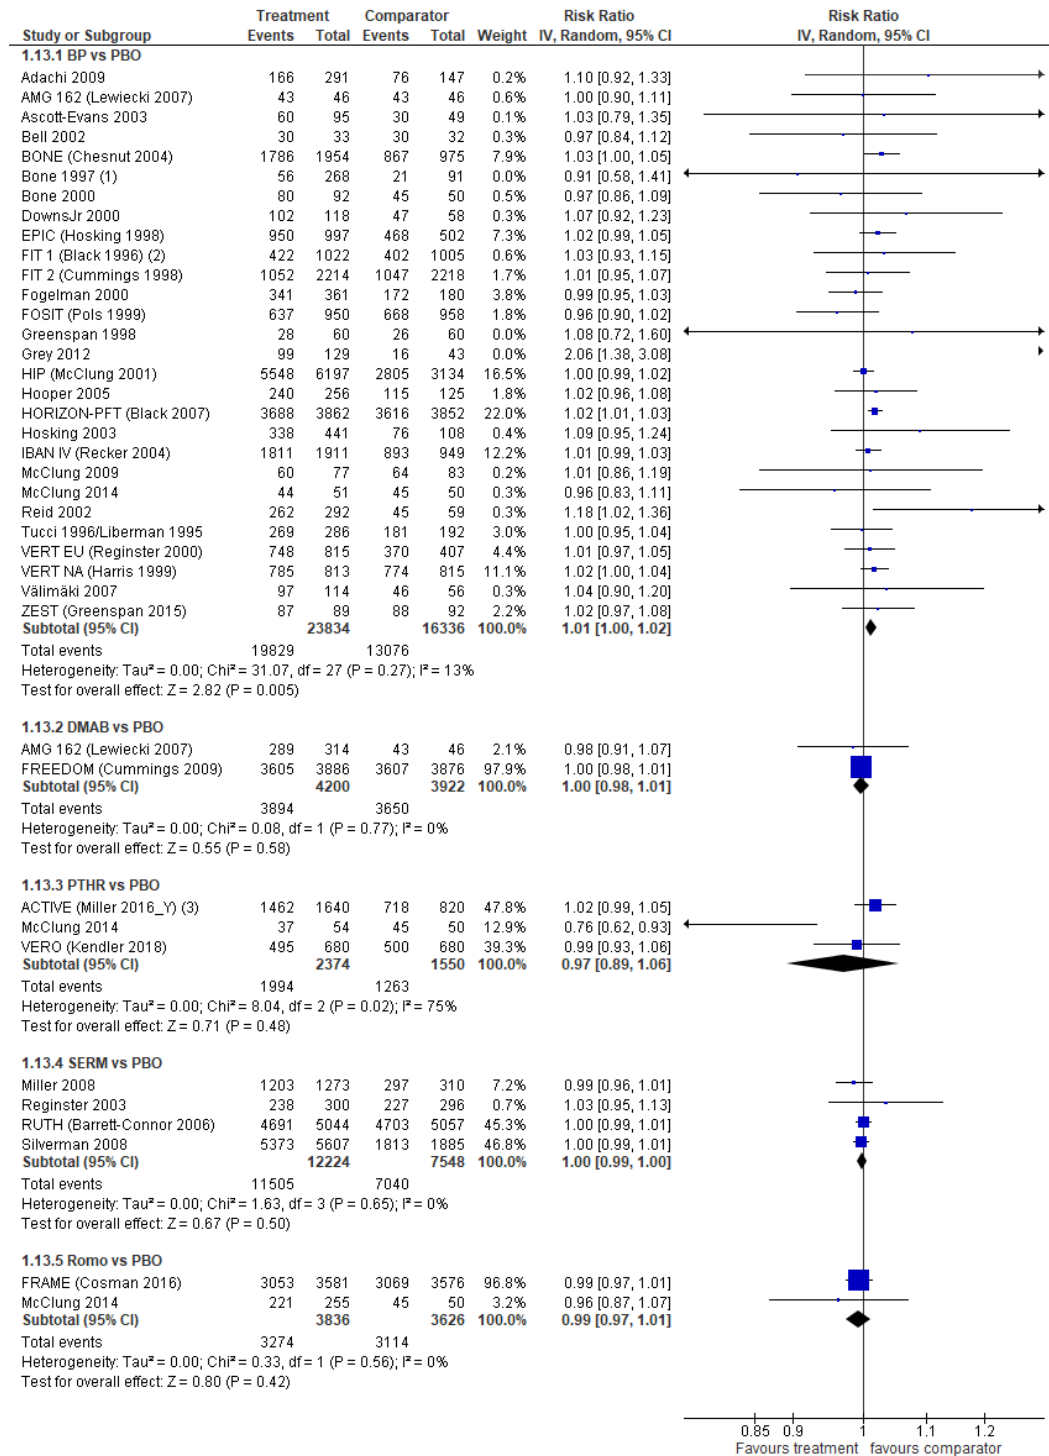

### Footnotes

- (1) adverse experiences suspected of being drug related
- (2) Any upper-gastrointestinal problem
- (3) Treatment emergent adverse events

Abbreviations: Bisphosphonates [BP], denosumab [DMAB], parathyroid hormone receptor [PTHr] agonists, placebo [PBO], romosozumab [Romo], selective oestrogen receptor modulators [SERM], confidence interval [CI].

## Forest plot of risk ratio on number of patients with any adverse events comparing treatment to other treatments

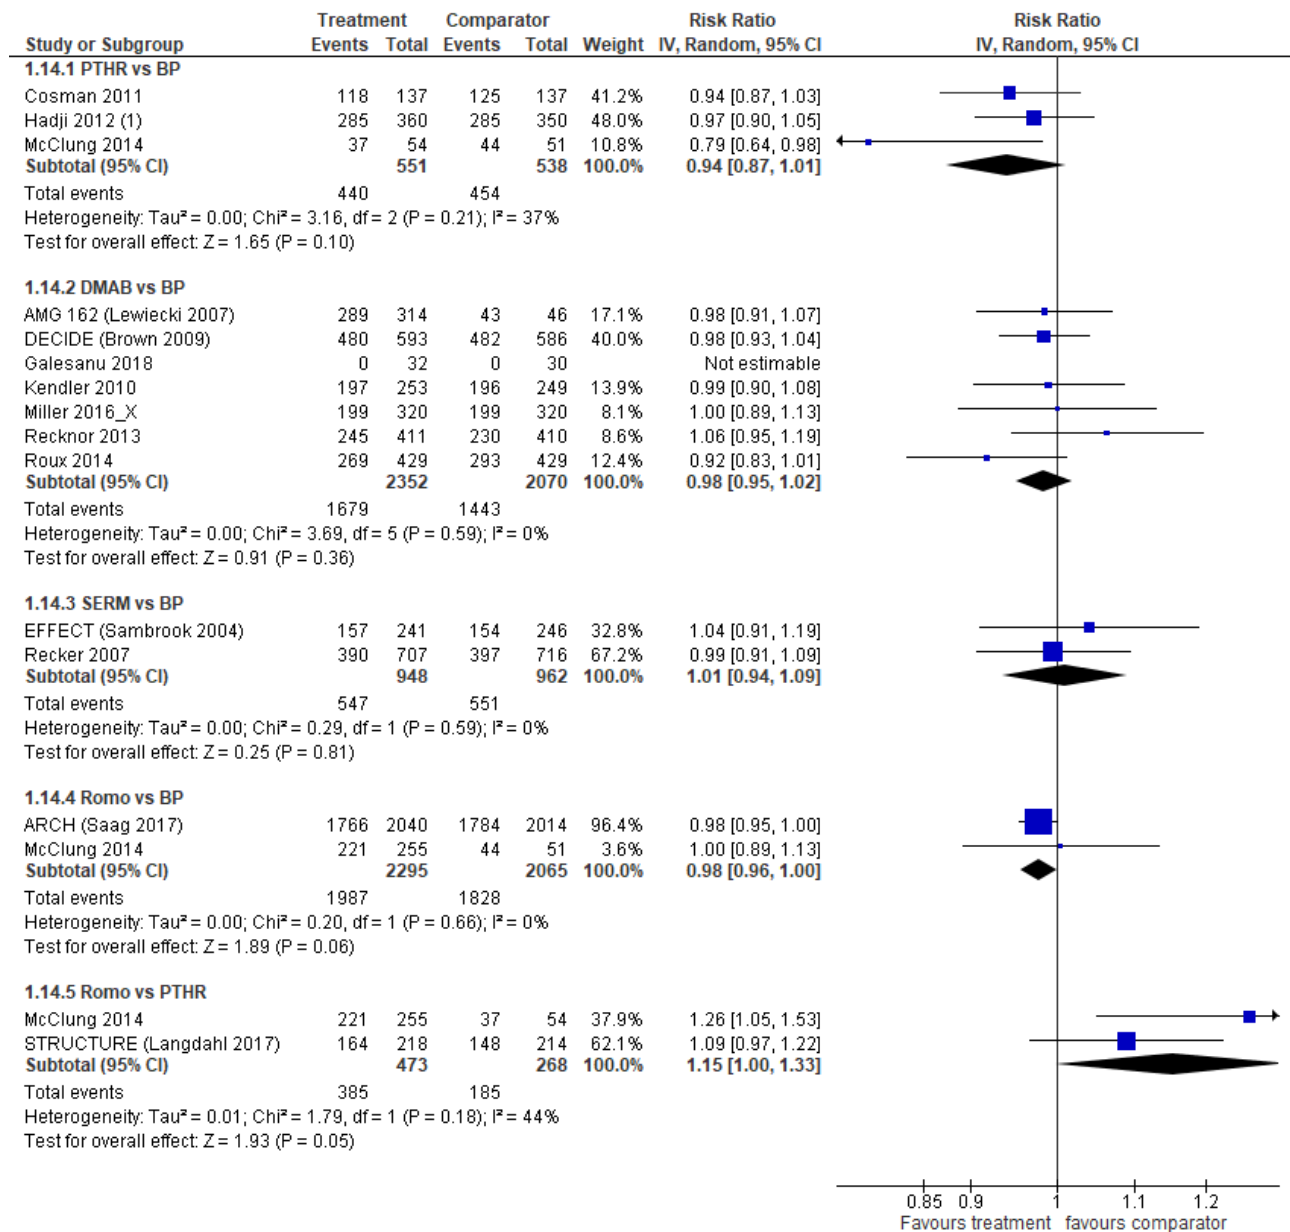

### Footnotes

(1) Treatment emergent adverse events

Abbreviations: Bisphosphonates [BP], denosumab [DMAB], parathyroid hormone receptor [PTHr] agonists, romosozumab [Romo], selective oestrogen receptor modulators [SERM], confidence interval [CI].

## Forest plot of risk ratio on number of patients with cardiovascular related serious adverse events comparing treatment to placebo

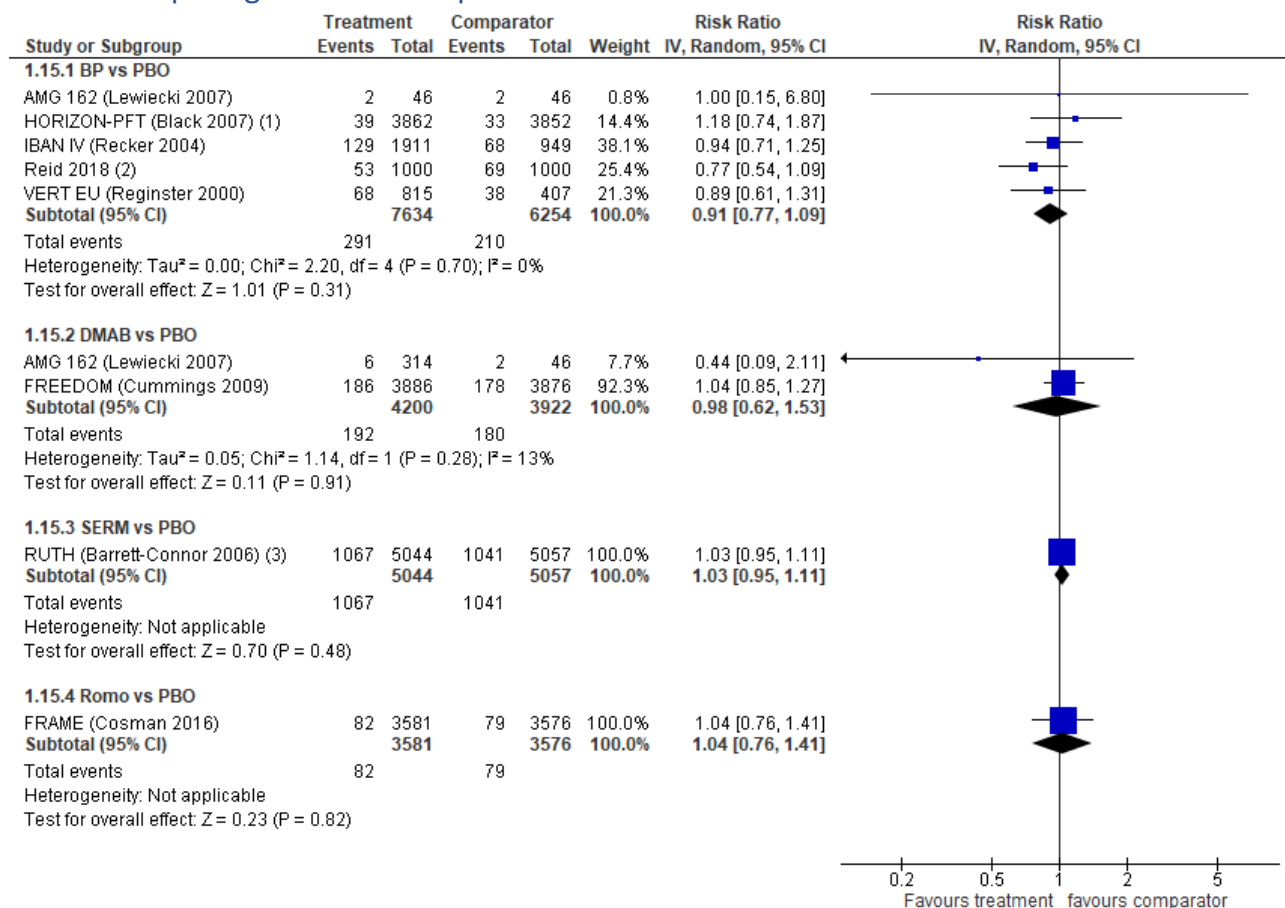

### Footnotes

(1) Death from cardiovascular causes

(2) Composite of vascular events

(3) Death from cardiovascular causes, nonfatal myocardial infarction, hospitalization for an acute coronary syndrome, myocardial revascularization, or...

Abbreviations: Bisphosphonates [BP], denosumab [DMAB], parathyroid hormone receptor [PTHr] agonists, placebo [PBO], romosozumab [Romo], selective oestrogen receptor modulators [SERM], confidence interval [CI].

## Forest plot of risk ratio on number of patients with cardiovascular related serious adverse events comparing treatment to other treatments

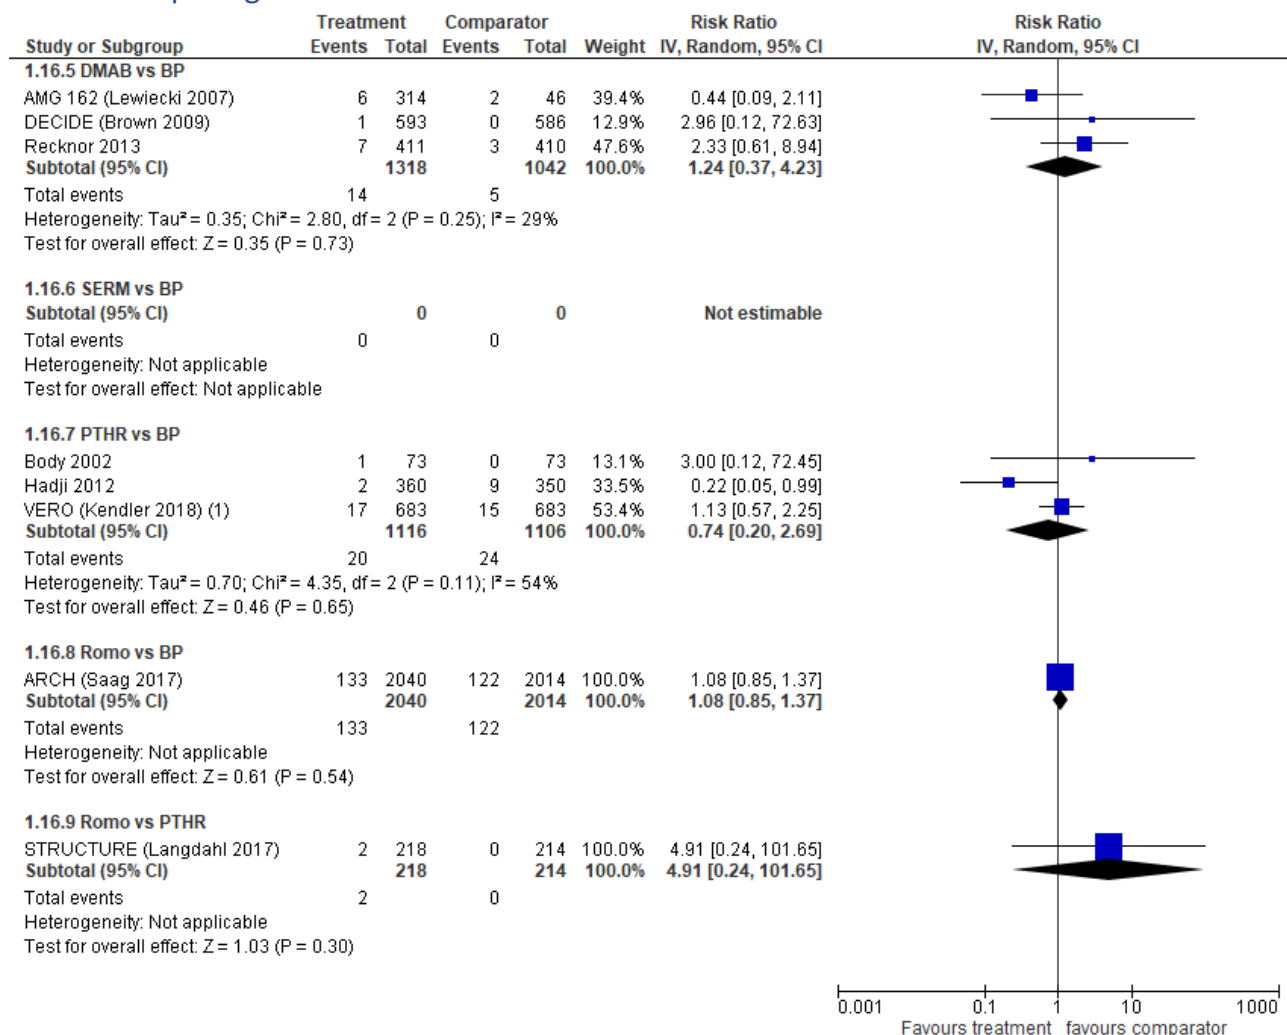

### Footnotes

(1) Estimates extracted from clinicaltrials.gov

Abbreviations: Bisphosphonates [BP], denosumab [DMAB], parathyroid hormone receptor [PTHr] agonists, romosozumab [Romo], selective oestrogen receptor modulators [SERM], confidence interval [CI].

### S3 Fig. Distribution of baseline risk indicators across the direct comparisons included in network meta-analysis

The distribution of baseline risk indicator (mean age) across the direct comparisons included in the network meta-analysis

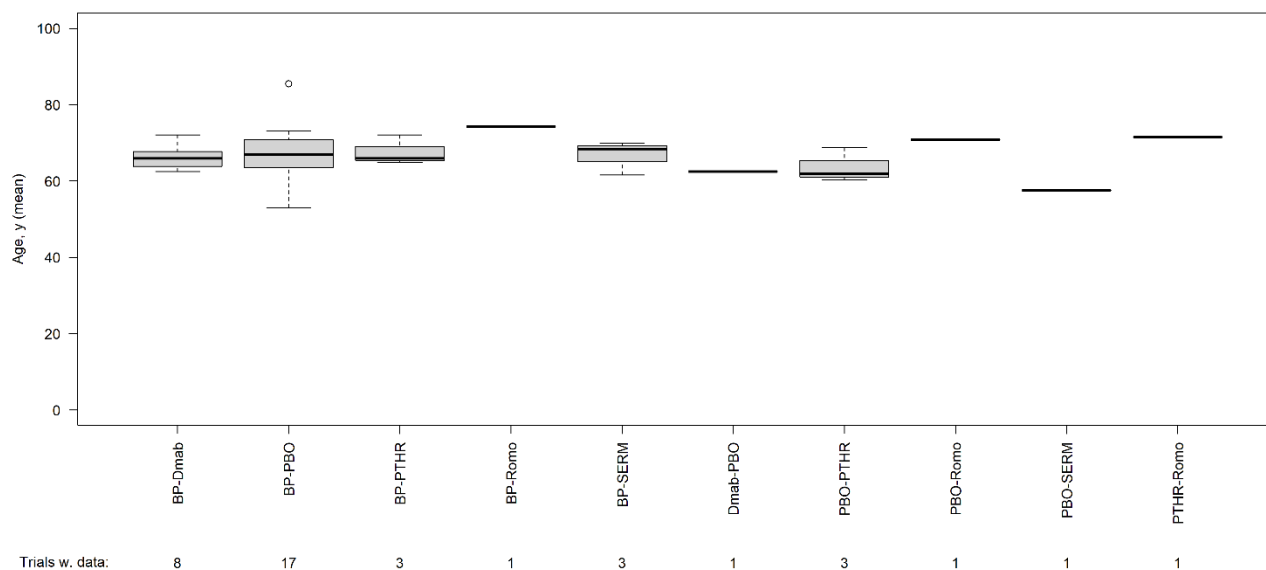

Abbreviations: Bisphosphonates [BP], denosumab [Dmab], parathyroid hormone receptor [PTHr] agonists, placebo [PBO], romosozumab [Romo], selective oestrogen receptor modulators [SERM].

The distribution of baseline risk indicator (mean BMI) across the direct comparisons included in the network meta-analysis

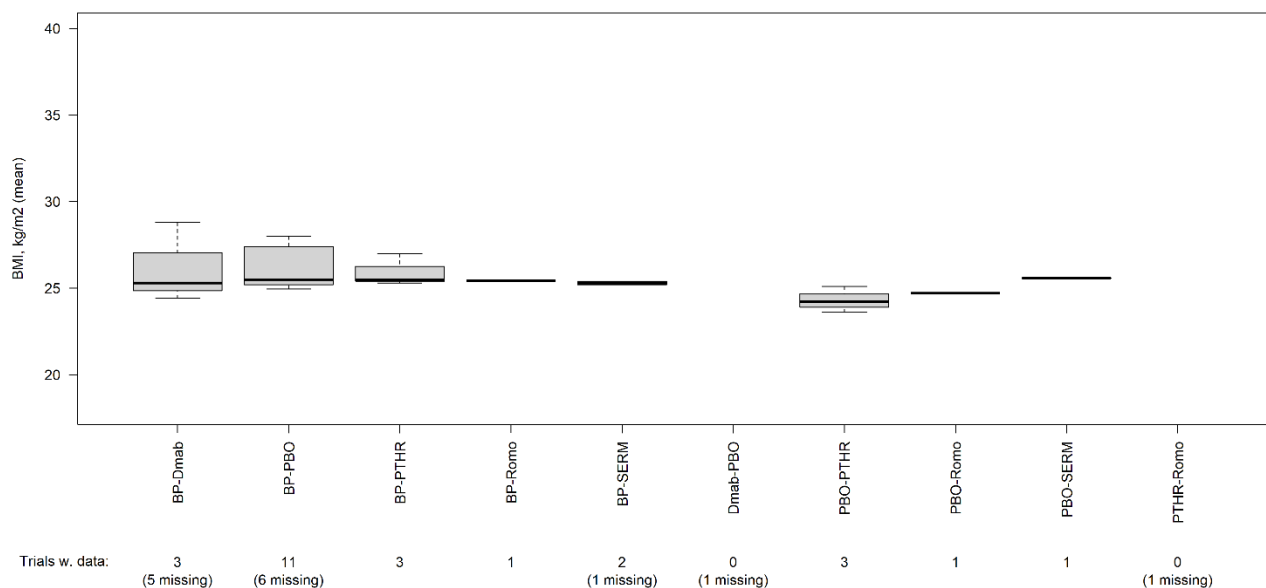

Abbreviations: Bisphosphonates [BP], body mass index [BMI], denosumab [Dmab], parathyroid hormone receptor [PTHr] agonists, placebo [PBO], romosozumab [Romo], selective oestrogen receptor modulators [SERM].

The distribution of baseline risk indicator (FRAX) across the direct comparisons included in the network meta-analysis

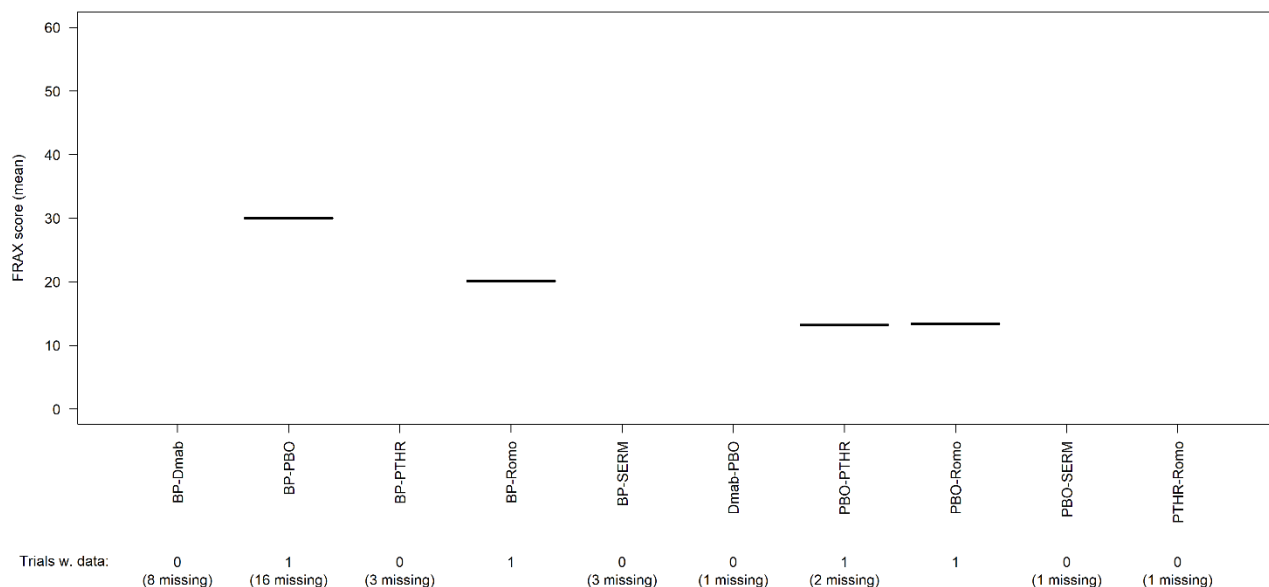

Abbreviations: Bisphosphonates [BP], denosumab [Dmab], parathyroid hormone receptor [PTHr] agonists, placebo [PBO], romosozumab [Romo], selective oestrogen receptor modulators [SERM].

The distribution of baseline risk indicator (lumbar spine BMD T-score) across the direct comparisons included in the network meta-analysis

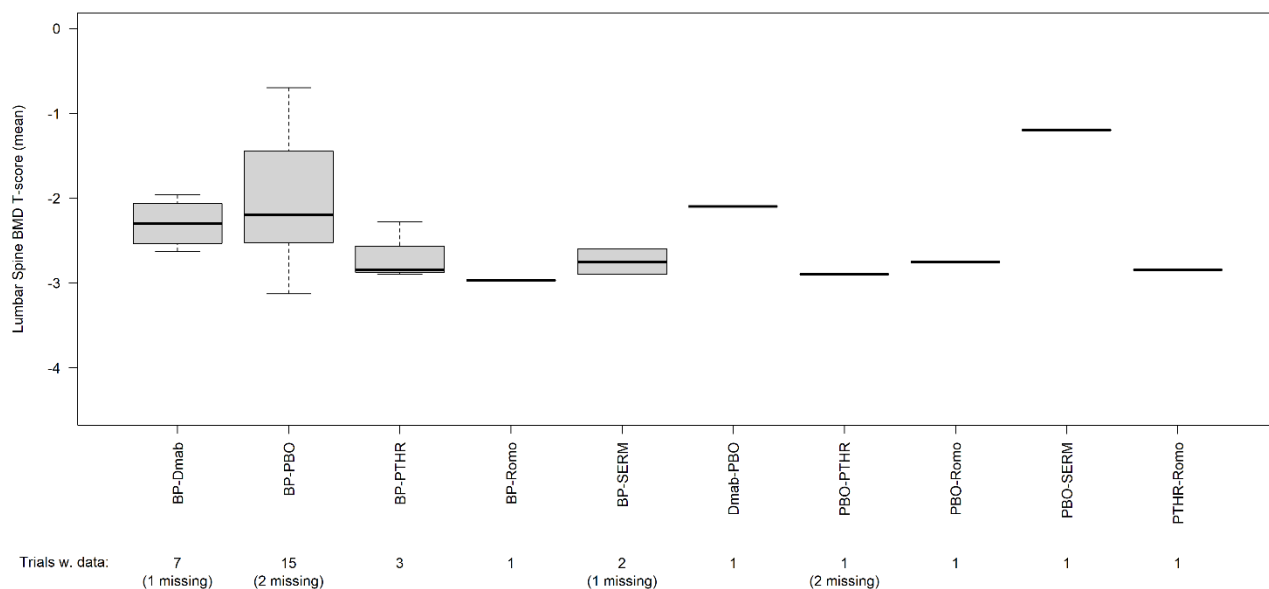

Abbreviations: Bisphosphonates [BP], bone mineral density [BMD], denosumab [Dmab], parathyroid hormone receptor [PTHr] agonists, placebo [PBO], romosozumab [Romo], selective oestrogen receptor modulators [SERM].



The distribution of baseline risk indicator (previous fracture history) across the direct comparisons included in the network meta-analysis

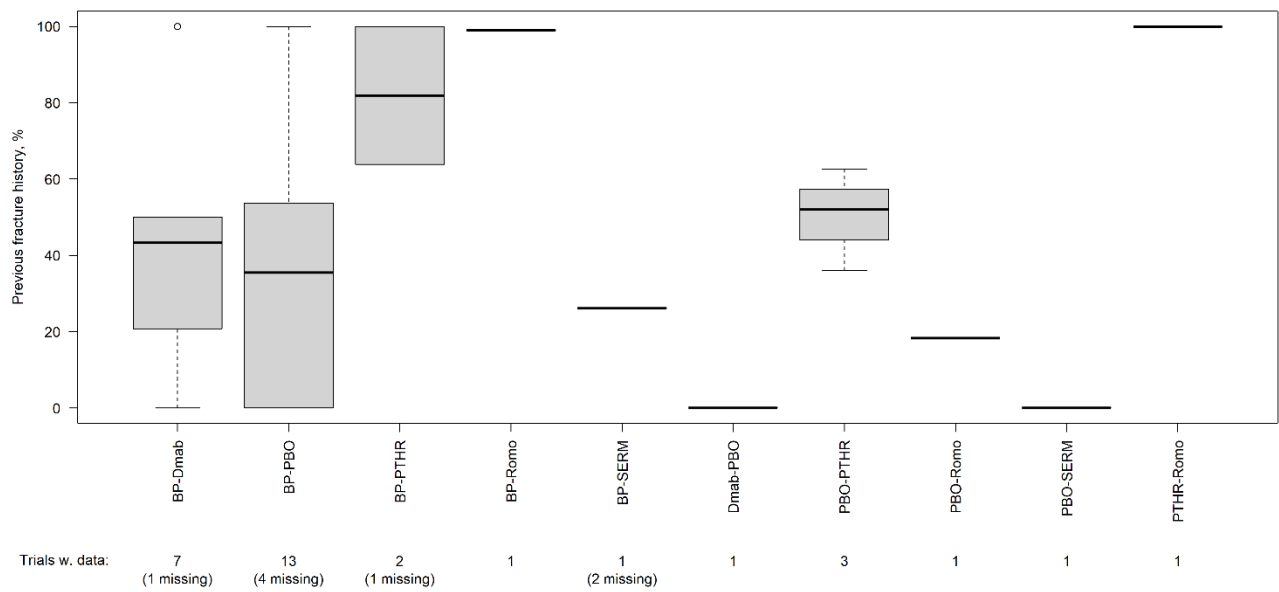

Abbreviations: Bisphosphonates [BP], denosumab [Dmab], parathyroid hormone receptor [PTHr] agonists, placebo [PBO], romosozumab [Romo], selective oestrogen receptor modulators [SERM].

## S8 Table. Network meta-analysis, sensitivity analyses

Sensitivity analyses adjusting each group for the study duration multiplied by the specific number of participants randomly allocated (i.e., a proxy for patient-years) are presented in supplemental material

### Sensitivity analyses, fractures outcomes

|              | Clinical fractures |                | VF    |                | Non-VF |                | Hip   |                | MOF   |                |
|--------------|--------------------|----------------|-------|----------------|--------|----------------|-------|----------------|-------|----------------|
|              | OR                 | 95%CI          | OR    | 95%CI          | OR     | 95%CI          | OR    | 95%CI          | OR    | 95%CI          |
| BP vs Dmab   | 0.801              | (0.56 to 1.14) | 1.829 | (1.11 to 3.01) | 0.991  | (0.76 to 1.29) | 1.181 | (0.68 to 2.06) | 0.667 | (0.28 to 1.59) |
| BP vs PBO    | 0.756              | (0.66 to 0.86) | 0.578 | (0.49 to 0.68) | 0.794  | (0.72 to 0.88) | 0.671 | (0.54 to 0.84) | 0.653 | (0.46 to 0.93) |
| BP vs PTHR   | 1.519              | (1.13 to 2.04) | 2.517 | (1.81 to 3.50) | 1.283  | (1.01 to 1.63) | 1.568 | (0.78 to 3.17) | 1.573 | (0.78 to 3.18) |
| BP vs Romo   | 1.245              | (0.97 to 1.60) | 2.063 | (1.38 to 3.09) | 1.208  | (0.96 to 1.53) | 1.616 | (1.08 to 2.43) | 1.3   | (0.85 to 1.98) |
| BP vs SERM   | 1.437              | (0.74 to 2.80) | 0.963 | (0.70 to 1.32) | 0.957  | (0.80 to 1.15) | 0.782 | (0.47 to 1.29) | 1.098 | (0.30 to 4.01) |
| Dmab vs PBO  | 0.944              | (0.65 to 1.37) | 0.316 | (0.20 to 0.51) | 0.801  | (0.62 to 1.03) | 0.568 | (0.34 to 0.95) | 0.979 | (0.40 to 2.40) |
| Dmab vs PTHR | 1.896              | (1.20 to 3.00) | 1.376 | (0.77 to 2.45) | 1.295  | (0.92 to 1.83) | 1.327 | (0.56 to 3.16) | 2.358 | (0.77 to 7.18) |
| Dmab vs Romo | 1.554              | (1.01 to 2.39) | 1.128 | (0.60 to 2.11) | 1.22   | (0.87 to 1.72) | 1.368 | (0.69 to 2.70) | 1.948 | (0.76 to 5.01) |
| Dmab vs SERM | 1.794              | (0.85 to 3.80) | 0.526 | (0.30 to 0.93) | 0.966  | (0.71 to 1.31) | 0.662 | (0.32 to 1.38) | 1.646 | (0.36 to 7.47) |
| PBO vs PTHR  | 2.009              | (1.48 to 2.72) | 4.357 | (3.12 to 6.08) | 1.616  | (1.27 to 2.05) | 2.338 | (1.16 to 4.73) | 2.409 | (1.29 to 4.49) |
| PBO vs Romo  | 1.646              | (1.27 to 2.13) | 3.572 | (2.36 to 5.41) | 1.523  | (1.20 to 1.93) | 2.41  | (1.54 to 3.78) | 1.991 | (1.28 to 3.10) |
| PBO vs SERM  | 1.901              | (0.97 to 3.73) | 1.667 | (1.22 to 2.28) | 1.205  | (1.01 to 1.44) | 1.166 | (0.68 to 1.99) | 1.681 | (0.48 to 5.87) |
| PTHR vs Romo | 0.82               | (0.57 to 1.19) | 0.82  | (0.49 to 1.37) | 0.942  | (0.68 to 1.30) | 1.031 | (0.46 to 2.30) | 0.826 | (0.39 to 1.74) |
| PTHR vs SERM | 0.946              | (0.46 to 1.96) | 0.383 | (0.25 to 0.59) | 0.746  | (0.56 to 1.00) | 0.499 | (0.21 to 1.17) | 0.698 | (0.17 to 2.88) |
| Romo vs SERM | 1.155              | (0.57 to 2.35) | 0.467 | (0.28 to 0.77) | 0.792  | (0.59 to 1.06) | 0.484 | (0.25 to 0.92) | 0.845 | (0.23 to 3.17) |

Abbreviations: bisphosphonate [BP], confidence interval [CI], Denosumab [Dmab], major osteoporotic fractures [MOF], odds ratio [OR], parathyroid hormone receptor agonist [PTHR], placebo [PBO], romosozumab [Romo]; selective oestrogen receptor modulators [SERM], vertebral fractures [VF]

## Sensitivity analysis, safety outcomes

|              | AE    |                | SAE CVD |                | Deaths  |       |
|--------------|-------|----------------|---------|----------------|---------|-------|
|              | OR    | 95%CI          | OR      | 95%CI          | OR      | 95%CI |
| BP vs Dmab   | 1.092 | (0.94 to 1.27) | 0.83    | (0.60 to 1.14) | No info |       |
| BP vs PBO    | 1.116 | (1.02 to 1.22) | 0.859   | (0.68 to 1.08) |         |       |
| BP vs PTHR   | 1.196 | (0.99 to 1.45) | 1.324   | (0.69 to 2.56) |         |       |
| BP vs Romo   | 1.089 | (0.90 to 1.31) | 0.877   | (0.69 to 1.12) |         |       |
| BP vs SERM   | 1.065 | (0.90 to 1.26) | 0.825   | (0.64 to 1.07) |         |       |
| Dmab vs PBO  | 1.022 | (0.87 to 1.20) | 1.034   | (0.82 to 1.30) |         |       |
| Dmab vs PTHR | 1.096 | (0.86 to 1.40) | 1.595   | (0.78 to 3.28) |         |       |
| Dmab vs Romo | 0.998 | (0.79 to 1.26) | 1.056   | (0.75 to 1.49) |         |       |
| Dmab vs SERM | 0.975 | (0.78 to 1.22) | 0.993   | (0.77 to 1.28) |         |       |
| PBO vs PTHR  | 1.072 | (0.88 to 1.31) | 1.542   | (0.78 to 3.07) |         |       |
| PBO vs Romo  | 0.976 | (0.81 to 1.18) | 1.021   | (0.79 to 1.33) |         |       |
| PBO vs SERM  | 0.954 | (0.81 to 1.13) | 0.96    | (0.86 to 1.07) |         |       |
| PTHR vs Romo | 0.911 | (0.72 to 1.16) | 0.662   | (0.33 to 1.32) |         |       |
| PTHR vs SERM | 0.89  | (0.70 to 1.14) | 0.623   | (0.31 to 1.25) |         |       |
| Romo vs SERM | 0.978 | (0.77 to 1.25) | 0.941   | (0.71 to 1.25) |         |       |

Abbreviations: adverse events [AE], cardiovascular related serious adverse events [SAE CVD], bisphosphonate [BP], confidence interval [CI], Denosumab [Dmab], odds ratio [OR], parathyroid hormone receptor agonist [PTHR], placebo [PBO], romosozumab [Romo]; selective oestrogen receptor modulators [SERM]

## S9 Table. Mean ranks on clinical fractures

| Treatment | Mean rank |
|-----------|-----------|
| PTHR      | 1.40      |
| Romo      | 2.31      |
| SERM      | 2.92      |
| BP        | 3.70      |
| Placebo   | 5.14      |
| Dmab      | 5.53      |

Abbreviations: Bisphosphonates [BP], denosumab [Dmab], parathyroid hormone receptor [PTHR] agonists, placebo [PBO], romosozumab [Romo], selective oestrogen receptor modulators [SERM].

## S10 Table. SUCRA on clinical fractures

The surface under the cumulative ranking curve (SUCRA) is a numeric presentation of the overall ranking and presents a single number associated with each treatment on clinical fractures. SUCRA values range from 0 to 1. The higher the SUCRA value, the higher the likelihood that a therapy is in the top rank or one of the top ranks; the closer to 0, the more likely that a therapy is in the bottom rank, or one of the bottom ranks. Abbreviations: Bisphosphonates [BP], denosumab [Dmab], parathyroid hormone receptor [PTHR] agonists, romosozumab [Romo], selective oestrogen receptor modulators [SERM].

| Treatment | SUCRA value |
|-----------|-------------|
| PTHR      | 0.921       |
| Romo      | 0.737       |
| SERM      | 0.616       |
| BP        | 0.460       |
| Placebo   | 0.172       |
| Dmab      | 0.094       |

## S4 Fig. Rankogram on clinical fractures.

Histograms are shown for each treatment reflecting corresponding probabilities for each position in the ranking of the five interventions (rankograms). The shades of gray visualise the ranks; bars with the darkest gray colour are the probability of the treatment being ranked highest, and the bars with the lightest gray colour are the probability of the intervention being ranked the lowest. Abbreviations: Bisphosphonates [BP], denosumab [Dmab], parathyroid hormone receptor [PTHR] agonists, placebo [PBO], romosozumab [Romo], selective oestrogen receptor modulators [SERM].

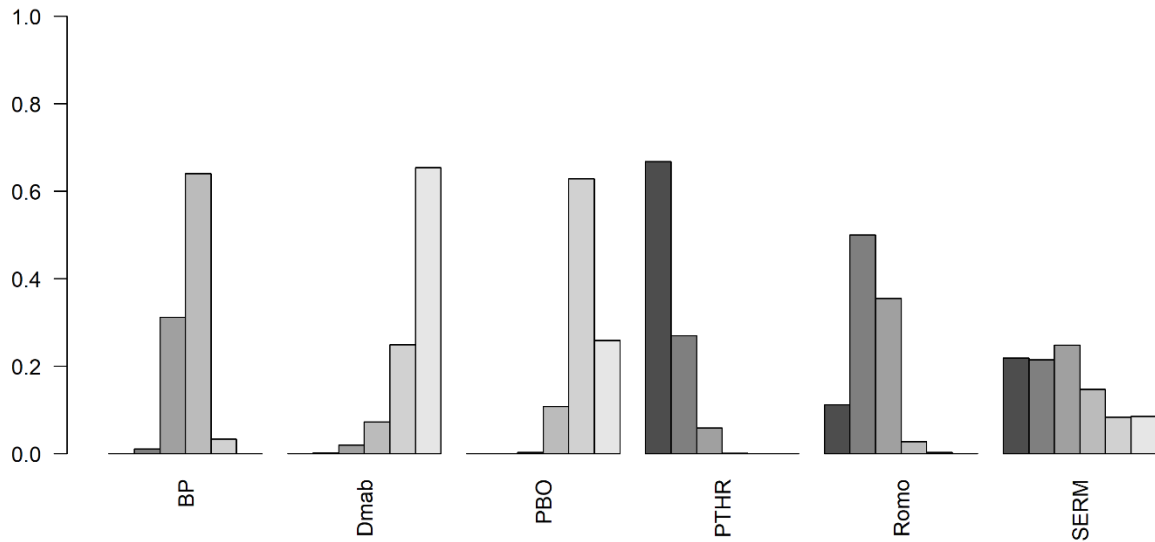

## S11 Table. Meta-regression analyses

### Meta-regression analyses on clinical fracture risk

| Risk indicator                   | <i>k</i><br>comparisons | $\beta$ | 95% CI           | $\tau^2$ | $\tau^2_{\text{0}}^{\text{§}}$ | % $\tau^2_{\text{explained}}^*$ | $I^2$ | p-value <sup>†</sup> |
|----------------------------------|-------------------------|---------|------------------|----------|--------------------------------|---------------------------------|-------|----------------------|
| <b>Antiresorptives v placebo</b> |                         |         |                  |          |                                |                                 |       |                      |
| Previous fracture history, %     | 15                      | 0.998   | (0.994 to 1.002) | 0.01     | 0.01                           | 0%                              | 20    | 0.347                |
| Age, y (mean)                    | 17                      | 0.979   | (0.960 to 0.998) | 0.00     | 0.01                           | 97%                             | 1     | <b>0.031</b>         |
| Lumbar Spine BMD T-score (mean)  | 17                      | 1.100   | (0.921 to 1.314) | 0.02     | 0.01                           | 0%                              | 33    | 0.294                |
| BMI, kg/m <sup>2</sup> (mean)    | 12                      | 0.998   | (0.835 to 1.193) | 0.03     | 0.02                           | 0%                              | 50    | 0.981                |
| <b>BP v placebo</b>              |                         |         |                  |          |                                |                                 |       |                      |
| Previous fracture history, %     | 13                      | 0.998   | (0.994 to 1.002) | 0.01     | 0.01                           | 0%                              | 24    | 0.345                |
| Age, y (mean)                    | 16                      | 0.976   | (0.958 to 0.996) | 0.00     | 0.01                           | 100%                            | 0     | <b>0.016</b>         |
| Lumbar Spine BMD T-score (mean)  | 15                      | 1.114   | (0.929 to 1.336) | 0.02     | 0.01                           | 0%                              | 37    | 0.244                |
| BMI, kg/m <sup>2</sup> (mean)    | 11                      | 0.995   | (0.827 to 1.196) | 0.03     | 0.02                           | 0%                              | 56    | 0.954                |
| <b>Anabolics v placebo</b>       |                         |         |                  |          |                                |                                 |       |                      |
| Previous fracture history, %     | 3                       | 1.000   | (0.982 to 1.018) | 0.05     | 0.00                           | 0%                              | 13    | 0.998                |
| Age, y (mean)                    | 3                       | 1.068   | (0.925 to 1.233) | 0.00     | 0.00                           | 100%                            | 0     | 0.367                |
| BMI, kg/m <sup>2</sup> (mean)    | 3                       | 1.366   | (0.600 to 3.112) | 0.00     | 0.00                           | 100%                            | 0     | 0.458                |
| <b>Anabolics v BP</b>            |                         |         |                  |          |                                |                                 |       |                      |
| Previous fracture history, %     | 3                       | 1.000   | (0.971 to 1.030) | 0.06     | 0.04                           | 0%                              | 68    | 0.998                |
| Age, y (mean)                    | 4                       | 0.985   | (0.892 to 1.088) | 0.07     | 0.03                           | 0%                              | 52    | 0.763                |
| Lumbar Spine BMD T-score (mean)  | 4                       | 0.546   | (0.280 to 1.062) | 0.00     | 0.03                           | 100%                            | 0     | <b>0.075</b>         |
| BMI, kg/m <sup>2</sup> (mean)    | 4                       | 0.773   | (0.580 to 1.031) | 0.00     | 0.03                           | 100%                            | 0     | <b>0.079</b>         |

Abbreviations: bisphosphonate (BP), body mass index (BMI), bone mineral density (BMD), confidence interval (CI), year (y)

Estimates from REML-based meta-regressions for the association between log(RR) for the outcome and the covariates were back-transformed. The slope,  $\beta$ , should be interpreted as the proportional increase (or decrease) in the treatment effect (i.e. risk ratio) pr. unit increase in the baseline risk indicator. <sup>§</sup> tau-squared for the model without the covariate; \* % $\tau^2_{\text{explained}}$  was calculated as  $(\tau^2_{\text{model w. risk indicator}} - \tau^2_{\text{model without risk indicator}}) / \tau^2_{\text{model without risk indicator}} * 100$ ;

† P-value from a Wald test for the effect of the covariate in the model. Bold p-values are presented as figures in supplemental material.

## Meta-regression on vertebral fracture risk

| Risk indicator                        | k comparisons | $\beta$ | 95% CI            | $\tau^2$ | $\tau^2_0^{\S}$ | % $\tau^2_{\text{explained}}^*$ | I <sup>2</sup> | p-value <sup>†</sup> |
|---------------------------------------|---------------|---------|-------------------|----------|-----------------|---------------------------------|----------------|----------------------|
| <b>Antiresorptives vs. placebo</b>    |               |         |                   |          |                 |                                 |                |                      |
| Previous fracture history, %          | 20            | 1.000   | (0.995 to 1.005)  | 0.07     | 0.06            | 0%                              | 70             | 0.960                |
| Age, y (mean)                         | 26            | 0.977   | (0.949 to 1.005)  | 0.07     | 0.08            | 2%                              | 67             | 0.112                |
| Lumbar Spine BMD T-score (mean)       | 17            | 1.111   | (0.848 to 1.455)  | 0.08     | 0.07            | 0%                              | 72             | 0.444                |
| BMI, kg/m <sup>2</sup> (mean)         | 20            | 1.026   | (0.894 to 1.178)  | 0.09     | 0.08            | 0%                              | 74             | 0.711                |
| <b>BP vs. placebo</b>                 |               |         |                   |          |                 |                                 |                |                      |
| Previous fracture history, %          | 14            | 0.999   | (0.992 to 1.005)  | 0.06     | 0.06            | 0%                              | 64             | 0.656                |
| Age, y (mean)                         | 18            | 0.984   | (0.955 to 1.013)  | 0.05     | 0.05            | 0%                              | 55             | 0.263                |
| Lumbar Spine BMD T-score (mean)       | 12            | 1.064   | (0.800 to 1.413)  | 0.08     | 0.07            | 0%                              | 68             | 0.671                |
| BMI, kg/m <sup>2</sup> (mean)         | 13            | 1.048   | (0.888 to 1.237)  | 0.06     | 0.05            | 0%                              | 60             | 0.582                |
| <b>Anabolic treatment vs. placebo</b> |               |         |                   |          |                 |                                 |                |                      |
| Previous fracture history, %          | 4             | 1.003   | (0.991 to 1.016)  | 0.08     | 0.02            | 0%                              | 32             | 0.636                |
| Age, y (mean)                         | 4             | 1.066   | (0.923 to 1.230)  | 0.02     | 0.02            | 0%                              | 22             | 0.387                |
| Lumbar Spine BMD T-score (mean)       | 3             | 3.969   | (0.638 to 24.673) | 0.00     | 0.01            | 100%                            | 0              | 0.139                |
| BMI, kg/m <sup>2</sup> (mean)         | 4             | 1.220   | (0.893 to 1.666)  | 0.01     | 0.02            | 54%                             | 5              | 0.212                |
| FRAX score (mean)                     | 3             | 1.063   | (0.966 to 1.170)  | 0.00     | 0.01            | 100%                            | 0              | 0.210                |
| <b>Anabolic treatment vs. BP</b>      |               |         |                   |          |                 |                                 |                |                      |
| Previous fracture history, %          | 6             | 1.013   | (0.992 to 1.033)  | 0.00     | 0.00            | 0%                              | 0              | 0.228                |
| Age, y (mean)                         | 6             | 1.076   | (0.974 to 1.189)  | 0.00     | 0.00            | 0%                              | 0              | 0.148                |
| Lumbar Spine BMD T-score (mean)       | 6             | 0.935   | (0.495 to 1.766)  | 0.00     | 0.00            | 0%                              | 0              | 0.835                |
| BMI, kg/m <sup>2</sup> (mean)         | 5             | 1.066   | (0.727 to 1.562)  | 0.04     | 0.00            | 0%                              | 16             | 0.743                |

Abbreviations: bisphosphonate (BP), body mass index (BMI), bone mineral density (BMD), Fracture Risk Assessment Tool (FRAX), confidence interval (CI), year (y). Estimates from REML-based meta-regressions for the association between log(RR) for the outcome and the covariates were back-transformed. The slope,  $\beta$ , should be interpreted as the proportional increase (or decrease) in the treatment effect (i.e. risk ratio) per unit increase in the baseline risk indicator.

<sup>§</sup> tau-squared for the model without the covariate

\* % $\tau^2_{\text{explained}}$  was calculated as  $(\tau^2_{\text{model w. covariate}} - \tau^2_{\text{model without covariate}}) / \tau^2_{\text{model without covariate}} * 100$ .

<sup>†</sup> P-value from a Wald test for the effect of the covariate in the model. Bold p-values are presented as figures in Fig 1 and in supplemental material.

## Meta-regression on non-vertebral fracture risk

| Risk indicator                        | k comparisons | $\beta$ | 95% CI           | $\tau^2$ | $\tau^2_{0^{\S}}$ | % $\tau^2_{\text{explained}}^*$ | I <sup>2</sup> | p-value <sup>†</sup> |
|---------------------------------------|---------------|---------|------------------|----------|-------------------|---------------------------------|----------------|----------------------|
| <b>Antiresorptives vs. placebo</b>    |               |         |                  |          |                   |                                 |                |                      |
| Previous fracture history, %          | 26            | 0.999   | (0.997 to 1.002) | 0.00     | 0.01              | 2%                              | 20             | 0.518                |
| Age, y (mean)                         | 34            | 0.988   | (0.975 to 1.002) | 0.00     | 0.01              | 43%                             | 11             | 0.082                |
| Lumbar Spine BMD T-score (mean)       | 21            | 0.943   | (0.823 to 1.080) | 0.00     | 0.01              | 21%                             | 16             | 0.395                |
| BMI, kg/m <sup>2</sup> (mean)         | 24            | 1.031   | (0.975 to 1.090) | 0.01     | 0.01              | 21%                             | 21             | 0.284                |
| <b>BP vs. placebo</b>                 |               |         |                  |          |                   |                                 |                |                      |
| Previous fracture history, %          | 20            | 1.001   | (0.998 to 1.004) | 0.01     | 0.00              | 0%                              | 20             | 0.629                |
| Age, y (mean)                         | 26            | 0.990   | (0.972 to 1.008) | 0.01     | 0.01              | 0%                              | 19             | 0.267                |
| Lumbar Spine BMD T-score (mean)       | 16            | 0.958   | (0.805 to 1.140) | 0.01     | 0.01              | 1%                              | 33             | 0.629                |
| BMI, kg/m <sup>2</sup> (mean)         | 18            | 0.960   | (0.837 to 1.100) | 0.01     | 0.01              | 0%                              | 32             | 0.556                |
| <b>Anabolic treatment vs. placebo</b> |               |         |                  |          |                   |                                 |                |                      |
| Previous fracture history, %          | 4             | 0.998   | (0.992 to 1.004) | 0.00     | 0.00              | 0%                              | 0              | 0.444                |
| Age, y (mean)                         | 4             | 1.098   | (0.859 to 1.403) | 0.00     | 0.00              | 0%                              | 0              | 0.455                |
| Lumbar Spine BMD T-score (mean)       | 4             | 0.787   | (0.209 to 2.961) | 0.00     | 0.00              | 0%                              | 0              | 0.723                |
| BMI, kg/m <sup>2</sup> (mean)         | 3             | 0.923   | (0.730 to 1.167) | 0.00     | 0.00              | 0%                              | 0              | 0.503                |
| FRAX score (mean)                     | 3             | 0.979   | (0.911 to 1.053) | 0.00     | 0.00              | 0%                              | 0              | 0.568                |
| <b>Anabolic treatment vs. BP</b>      |               |         |                  |          |                   |                                 |                |                      |
| Previous fracture history, %          | 6             | 0.994   | (0.977 to 1.012) | 0.00     | 0.00              | 0%                              | 0              | 0.529                |
| Age, y (mean)                         | 7             | 1.018   | (0.946 to 1.096) | 0.00     | 0.00              | 0%                              | 0              | 0.635                |
| Lumbar Spine BMD T-score (mean)       | 6             | 0.803   | (0.390 to 1.654) | 0.00     | 0.00              | 0%                              | 0              | 0.552                |
| BMI, kg/m <sup>2</sup> (mean)         | 5             | 0.938   | (0.694 to 1.268) | 0.00     | 0.00              | 0%                              | 0              | 0.678                |

Abbreviations: bisphosphonate (BP), body mass index (BMI), bone mineral density (BMD), Fracture Risk Assessment Tool (FRAX), confidence interval (CI), year (y)

Estimates from REML-based meta-regressions for the association between log(RR) for the outcome and the covariates were back-transformed. The slope,  $\beta$ , should be interpreted as the proportional increase (or decrease) in the treatment effect (i.e. risk ratio) pr. unit increase in the baseline risk indicator.

<sup>§</sup> tau-squared for the model without the covariate; \* % $\tau^2_{\text{explained}}$  was calculated as  $(\tau^2_{\text{model w. covariate}} - \tau^2_{\text{model without covariate}})/\tau^2_{\text{model without covariate}} * 100$ .

<sup>†</sup> P-value from a Wald test for the effect of the covariate in the model. Bold p-values are presented as figures in supplemental material.



## Meta-regression on hip fracture risk

| Risk indicator                        | k comparisons | $\beta$ | 95% CI            | $\tau^2$ | $\tau^2_0^{\S}$ | % $\tau^2_{\text{explained}}^*$ | $I^2$ | p-value <sup>†</sup> |
|---------------------------------------|---------------|---------|-------------------|----------|-----------------|---------------------------------|-------|----------------------|
| <b>Antiresorptives vs. placebo</b>    |               |         |                   |          |                 |                                 |       |                      |
| Previous fracture history, %          | 15            | 1.001   | (0.994 to 1.009)  | 0.00     | 0.00            | 0%                              | 3     | 0.723                |
| Age, y (mean)                         | 18            | 0.984   | (0.948 to 1.022)  | 0.01     | 0.00            | 0%                              | 3     | 0.416                |
| Lumbar Spine BMD T-score (mean)       | 13            | 0.928   | (0.570 to 1.511)  | 0.03     | 0.02            | 0%                              | 17    | 0.765                |
| BMI, kg/m <sup>2</sup> (mean)         | 16            | 1.107   | (0.824 to 1.487)  | 0.00     | 0.00            | 0%                              | 2     | 0.500                |
| <b>BP vs. placebo</b>                 |               |         |                   |          |                 |                                 |       |                      |
| Previous fracture history, %          | 11            | 1.002   | (0.994 to 1.010)  | 0.00     | 0.00            | 0%                              | 0     | 0.669                |
| Age, y (mean)                         | 13            | 1.001   | (0.960 to 1.043)  | 0.00     | 0.00            | 0%                              | 0     | 0.962                |
| Lumbar Spine BMD T-score (mean)       | 9             | 0.905   | (0.541 to 1.514)  | 0.01     | 0.00            | 0%                              | 7     | 0.704                |
| BMI, kg/m <sup>2</sup> (mean)         | 11            | 1.130   | (0.814 to 1.569)  | 0.00     | 0.00            | 0%                              | 0     | 0.466                |
| <b>Anabolic treatment vs. placebo</b> |               |         |                   |          |                 |                                 |       |                      |
| Previous fracture history, %          | 3             | 1.006   | (0.984 to 1.029)  | 0.00     | 0.00            | 0%                              | 0     | 0.586                |
| Age, y (mean)                         | 3             | 0.709   | (0.205 to 2.446)  | 0.00     | 0.00            | 0%                              | 0     | 0.586                |
| FRAX score (mean)                     | 3             | 1.090   | (0.800 to 1.485)  | 0.00     | 0.00            | 0%                              | 0     | 0.586                |
| <b>Anabolics vs. BP</b>               |               |         |                   |          |                 |                                 |       |                      |
| Previous fracture history, %          | 5             | 1.010   | (0.975 to 1.046)  | 0.16     | 0.00            | 0%                              | 23    | 0.578                |
| Age, y (mean)                         | 5             | 0.780   | (0.570 to 1.068)  | 0.00     | 0.00            | 100%                            | 0     | 0.121                |
| Lumbar Spine BMD T-score (mean)       | 4             | 0.652   | (0.014 to 30.283) | 0.60     | 0.02            | 0%                              | 42    | 0.827                |
| BMI, kg/m <sup>2</sup> (mean)         | 3             | 0.711   | (0.268 to 1.891)  | 0.00     | 0.00            | 0%                              | 0     | 0.495                |

Abbreviations: bisphosphonate (BP), body mass index (BMI), bone mineral density (BMD), Fracture Risk Assessment Tool (FRAX), confidence interval (CI), year (y). Estimates from REML-based meta-regressions for the association between log(RR) for the outcome and the covariates were back-transformed. The slope,  $\beta$ , should be interpreted as the proportional increase (or decrease) in the treatment effect (i.e. risk ratio) per unit increase in the baseline risk indicator.

<sup>§</sup> tau-squared for the model without the covariate; \* % $\tau^2_{\text{explained}}$  was calculated as  $(\tau^2_{\text{model w. covariate}} - \tau^2_{\text{model without covariate}}) / \tau^2_{\text{model without covariate}} * 100$ ;

<sup>†</sup> P-value from a Wald test for the effect of the covariate in the model.
